# Supplementary material for: Novel roles of small extracellular vesicles in regulating the quiescence and proliferation of neural stem cells
Source: bioRxiv preprint, doi:10.1101/2021.08.20.456431, version 1 (2021-08-20)
Supplement: Supplementary Table 2 [file 456431_file05.xlsx]

## Sheet: QRE
			qExo 1(log2)	qExo 2(log2)	qExo 3(log2)	reExo 1(log2)	reExo 2(log2)	reExo 3(log2)	qExo 1	qExo 2	qExo 3	reExo 1	reExo 2	reExo 3
Protein names	Gene names	Fasta headers	Reporter intensity 4 (log2)	Reporter intensity 5 (log2)	Reporter intensity 6 (log2)	Reporter intensity 7 (log2)	Reporter intensity 8 (log2)	Reporter intensity 9 (log2)	Reporter intensity 1	Reporter intensity 2	Reporter intensity 3	Reporter intensity 7	Reporter intensity 8	Reporter intensity 9	average/average (reporter intensity)	log2	p-value	-log10 (p-value)
Ras-related protein Rab-5C	Rab5c	sp|P35278|RAB5C_MOUSE Ras-related protein Rab-5C OS=Mus musculus OX=10090 GN=Rab5c PE=1 SV=2;tr|Q8C266|Q8C266_MOUSE Ras-related protein Rab-5C OS=Mus musculus OX=10090 GN=Rab5c PE=1 SV=1	13.8164	13.7909	13.8606	14.6207	14.6092	14.5853	14426.2	14173.4	14875	25192.4	24992.4	24581.7	0.581471	-0.782221	2.79216e-06	5.55406
Vacuolar protein sorting-associated protein 4B	Vps4b	sp|P46467|VPS4B_MOUSE Vacuolar protein sorting-associated protein 4B OS=Mus musculus OX=10090 GN=Vps4b PE=1 SV=2	15.1165	15.1922	15.2742	16.5792	16.5574	16.6139	35523.8	37437.6	39627.1	97912.1	96443.7	100296	0.382107	-1.38795	3.12621e-06	5.50498
Charged multivesicular body protein 1a	Chmp1a	sp|Q921W0|CHM1A_MOUSE Charged multivesicular body protein 1a OS=Mus musculus OX=10090 GN=Chmp1a PE=1 SV=1	13.0952	12.8543	13.0984	14.6378	14.682	14.6896	8750.8	7405.08	8770.24	25492.8	26285.9	26424.7	0.318735	-1.64957	4.98795e-06	5.30208
Neuronal growth regulator 1	Negr1	sp|Q80Z24|NEGR1_MOUSE Neuronal growth regulator 1 OS=Mus musculus OX=10090 GN=Negr1 PE=1 SV=1;tr|A0A4W9|A0A4W9_MOUSE Neuronal growth regulator 1 OS=Mus musculus OX=10090 GN=Negr1 PE=1 SV=1;tr|D3Z4T6|D3Z4T6_MOUSE Neuronal growth regulator 1 OS=Mus musculus	10.138	10.1885	10.3405	12.0848	12.0302	12.2056	1126.79	1166.93	1296.58	4343.97	4182.65	4723.37	0.270966	-1.88381	4.3937e-05	4.35717
Complement component C1q receptor	Cd93	sp|O89103|C1QR1_MOUSE Complement component C1q receptor OS=Mus musculus OX=10090 GN=Cd93 PE=1 SV=1	9.9017	9.93196	9.94365	11.7049	11.524	11.55	956.552	976.827	984.775	3338.3	2944.89	2998.45	0.314401	-1.66932	6.73557e-05	4.17163
Protein HEG homolog 1	Heg1	sp|E9Q7X6|HEG1_MOUSE Protein HEG homolog 1 OS=Mus musculus OX=10090 GN=Heg1 PE=1 SV=1;tr|A0A338P6D4|A0A338P6D4_MOUSE Protein HEG homolog 1 OS=Mus musculus OX=10090 GN=Heg1 PE=1 SV=1;tr|E9Q440|E9Q440_MOUSE Protein HEG homolog 1 OS=Mus musculus OX=10090 GN=H	12.7349	12.7927	12.8387	14.1612	14.0473	14.2334	6816.9	7095.56	7325.44	18320.9	16930.1	19261.1	0.3896	-1.35993	8.90383e-05	4.05042
Protocadherin gamma A6	Pcdhga6	tr|Q91XY2|Q91XY2_MOUSE Protocadherin gamma A6 OS=Mus musculus OX=10090 GN=Pcdhga6 PE=2 SV=1	13.5823	13.6515	13.8473	15.0775	15.098	15.2467	12265.3	12868	14738.5	34576.4	35071.2	38878.9	0.367392	-1.44461	0.000122428	3.91212
Vacuolar protein sorting-associated protein VTA1 homolog	Vta1	sp|Q9CR26|VTA1_MOUSE Vacuolar protein sorting-associated protein VTA1 homolog OS=Mus musculus OX=10090 GN=Vta1 PE=1 SV=1;tr|F6W5Q8|F6W5Q8_MOUSE Vacuolar protein sorting-associated protein VTA1 homolog (Fragment) OS=Mus musculus OX=10090 GN=Vta1 PE=1 SV=8	14.9929	15.2793	15.0908	16.2557	16.2894	16.4127	32607.1	39767.4	34896.6	78244.4	80093.6	87239.9	0.436811	-1.19492	0.000183672	3.73596
Vacuolar protein sorting-associated protein 4A	Vps4a	sp|Q8VEJ9|VPS4A_MOUSE Vacuolar protein sorting-associated protein 4A OS=Mus musculus OX=10090 GN=Vps4a PE=1 SV=1	14.2163	14.2377	14.5985	15.4871	15.5094	15.4881	19034.1	19318.6	24807.7	45928.4	46643.9	45960.3	0.455924	-1.13313	0.000186401	3.72955
Vacuolar protein-sorting-associated protein 36	Vps36	sp|Q91XD6|VPS36_MOUSE Vacuolar protein-sorting-associated protein 36 OS=Mus musculus OX=10090 GN=Vps36 PE=1 SV=1	15.6297	15.6009	15.8316	17.1616	17.2288	17.3915	50700.1	49698	58315.8	146608	153598	171935	0.336158	-1.57279	0.000201109	3.69657
TBC1 domain family member 10A	Tbc1d10a	sp|P58802|TB10A_MOUSE TBC1 domain family member 10A OS=Mus musculus OX=10090 GN=Tbc1d10a PE=1 SV=1;tr|Q5SPX8|Q5SPX8_MOUSE TBC1 domain family member 10A OS=Mus musculus OX=10090 GN=Tbc1d10a PE=1 SV=1	9.70256	9.73291	9.88364	12.2021	12.2872	11.9671	833.224	850.938	944.653	4711.92	4998.22	4003.65	0.191691	-2.38314	0.00024196	3.61626
Cadherin-13	Cdh13	sp|Q9WTR5|CAD13_MOUSE Cadherin-13 OS=Mus musculus OX=10090 GN=Cdh13 PE=1 SV=2	15.0981	15.3343	15.6787	17.009	16.8649	17.0424	35073.7	41312.8	52451.6	131892	119355	134981	0.33358	-1.5839	0.000251031	3.60027
Uncharacterized protein C2orf72 homolog	N/A	sp|Q9CYS6|CB072_MOUSE Uncharacterized protein C2orf72 homolog OS=Mus musculus OX=10090 PE=1 SV=2	11.4369	11.1395	11.9429	13.158	13.2214	13.1635	2772.36	2255.92	3937.05	9140.14	9550.76	9175.05	0.321731	-1.63607	0.000254934	3.59357
Embryonal Fyn-associated substrate	Efs	sp|Q64355|EFS_MOUSE Embryonal Fyn-associated substrate OS=Mus musculus OX=10090 GN=Efs PE=1 SV=2;tr|A0A2I3BQ52|A0A2I3BQ52_MOUSE Embryonal Fyn-associated substrate OS=Mus musculus OX=10090 GN=Efs PE=1 SV=1	12.2082	12.4452	12.2157	13.8315	13.8548	14.0632	4731.89	5576.72	4756.55	14577.9	14815.3	17117.7	0.323906	-1.62635	0.0002556	3.59244
Crk-like protein	Crkl	sp|P47941|CRKL_MOUSE Crk-like protein OS=Mus musculus OX=10090 GN=Crkl PE=1 SV=2	10.6398	10.4757	10.2606	11.4158	11.4612	11.494	1595.51	1423.97	1226.73	2732.11	2819.45	2884.29	0.503352	-0.990361	0.000266593	3.57415
Vacuolar protein sorting-associated protein 37C	Vps37c	sp|Q8R105|VP37C_MOUSE Vacuolar protein sorting-associated protein 37C OS=Mus musculus OX=10090 GN=Vps37c PE=1 SV=1;tr|A0A494BAY0|A0A494BAY0_MOUSE Vacuolar protein sorting-associated protein 37C (Fragment) OS=Mus musculus OX=10090 GN=Vps37c PE=1 SV=1;tr|A0A	14.5658	14.496	14.5336	15.5375	15.3826	15.3633	24251.7	23106.3	23716.4	47561.3	42719.3	42151.6	0.536686	-0.89785	0.000305155	3.51548
Protein tweety homolog 3	Ttyh3	sp|Q6P5F7|TTYH3_MOUSE Protein tweety homolog 3 OS=Mus musculus OX=10090 GN=Ttyh3 PE=1 SV=1	15.3585	15.2455	15.4547	16.0769	16.2273	16.1754	42011.6	38846.6	44908.5	69124	76719.2	74008.3	0.572053	-0.80578	0.00037655	3.42418
Disintegrin and metalloproteinase domain-containing protein 10	Adam10	sp|O35598|ADA10_MOUSE Disintegrin and metalloproteinase domain-containing protein 10 OS=Mus musculus OX=10090 GN=Adam10 PE=1 SV=2	15.9265	16.3305	16.0871	17.5104	17.65	17.7718	62280.8	82408.2	69614.5	186705	205674	223792	0.347799	-1.52368	0.000392928	3.40569
Tetraspanin-15	Tspan15	sp|F7BWT7|TSN15_MOUSE Tetraspanin-15 OS=Mus musculus OX=10090 GN=Tspan15 PE=1 SV=2	10.9728	11.887	11.4717	13.1842	13.1171	13.2731	2009.75	3787.42	2840.05	9307.64	8884.65	9899.23	0.307467	-1.7015	0.00039418	3.4043
Cell differentiation protein RCD1 homolog	Rqcd1	sp|Q9JKY0|CNOT9_MOUSE CCR4-NOT transcription complex subunit 9 OS=Mus musculus OX=10090 GN=Cnot9 PE=1 SV=1	11.249	11.0577	11.0892	10.2182	10.0745	10.2292	2433.81	2131.57	2178.62	1191.2	1078.27	1200.32	1.94364	0.958758	0.000428417	3.36813
Neurotrimin	Ntm	sp|Q99PJ0|NTRI_MOUSE Neurotrimin OS=Mus musculus OX=10090 GN=Ntm PE=1 SV=2;tr|D3Z396|D3Z396_MOUSE Neurotrimin OS=Mus musculus OX=10090 GN=Ntm PE=1 SV=1;tr|Q8BG33|Q8BG33_MOUSE Neurotrimin OS=Mus musculus OX=10090 GN=Ntm PE=1 SV=1;tr|F6Z2M6|F6Z2M6_MOUSE Neur	13.6799	13.8174	13.8466	15.3893	15.0988	15.326	13123.8	14436.2	14731.3	42918.1	35090.7	41075.8	0.355137	-1.49355	0.000447563	3.34915
Chondroitin sulfate proteoglycan 4	Cspg4	sp|Q8VHY0|CSPG4_MOUSE Chondroitin sulfate proteoglycan 4 OS=Mus musculus OX=10090 GN=Cspg4 PE=1 SV=3	14.7912	14.8872	14.977	15.6498	15.6985	15.8292	28352.7	30303.6	32249.7	51411.4	53176.5	58218.9	0.558368	-0.840712	0.000503228	3.29824
Clathrin light chain B	Cltb	sp|Q6IRU5|CLCB_MOUSE Clathrin light chain B OS=Mus musculus OX=10090 GN=Cltb PE=1 SV=1;tr|F7BHJ0|F7BHJ0_MOUSE Clathrin light chain (Fragment) OS=Mus musculus OX=10090 GN=Cltb PE=1 SV=1	12.865	13.006	13.3817	14.195	14.207	14.271	7460.21	8226.14	10673.2	18755.2	18911.8	19769.7	0.458932	-1.12365	0.000527128	3.27808
tr|Q8CFU0|Q8CFU0_MOUSE Transmembrane protein 198b OS=Mus musculus OX=10090 GN=Tmem198b PE=2 SV=1	Tmem198b	tr|Q8CFU0|Q8CFU0_MOUSE Transmembrane protein 198b OS=Mus musculus OX=10090 GN=Tmem198b PE=2 SV=1	10.4751	11.1571	10.8867	13.1237	12.8612	13.2169	1423.37	2283.61	1893.32	8925.39	7440.58	9521.02	0.216336	-2.20865	0.000531964	3.27412
Neurexin-1	Nrxn1	sp|Q9CS84|NRX1A_MOUSE Neurexin-1 OS=Mus musculus OX=10090 GN=Nrxn1 PE=1 SV=3;tr|E0CY11|E0CY11_MOUSE Neurexin-1 OS=Mus musculus OX=10090 GN=Nrxn1 PE=1 SV=2	14.2137	14.3201	14.5366	15.3019	15.1681	15.2457	18999.8	20454.1	23765.8	40395.3	36817.4	38852	0.544694	-0.876482	0.000547827	3.26136
Ras-related C3 botulinum toxin substrate 1;Ras-related C3 botulinum toxin substrate 2;Ras-related C3 botulinum toxin substrate 3	Rac1;Rac2;Rac3	sp|P63001|RAC1_MOUSE Ras-related C3 botulinum toxin substrate 1 OS=Mus musculus OX=10090 GN=Rac1 PE=1 SV=1;tr|Q3TLP8|Q3TLP8_MOUSE Ras-related C3 botulinum toxin substrate 1 OS=Mus musculus OX=10090 GN=Rac1 PE=1 SV=1;sp|Q05144|RAC2_MOUSE Ras-related C3 botu	17.7506	17.8787	17.7763	18.8122	18.8286	19.0384	220528	241004	224491	460295	465558	538430	0.468505	-1.09386	0.000565343	3.24769
Cofilin-2	Cfl2	sp|P45591|COF2_MOUSE Cofilin-2 OS=Mus musculus OX=10090 GN=Cfl2 PE=1 SV=1;tr|A0A1Y7VJ71|A0A1Y7VJ71_MOUSE Cofilin-2 OS=Mus musculus OX=10090 GN=Cfl2 PE=1 SV=1	14.2748	14.499	14.6097	15.533	15.476	15.6833	19821.8	23154.4	25001	47413.2	45576.4	52619.1	0.466849	-1.09897	0.000570005	3.24412
Toll-interacting protein	Tollip	sp|Q9QZ06|TOLIP_MOUSE Toll-interacting protein OS=Mus musculus OX=10090 GN=Tollip PE=1 SV=1;tr|F7AT44|F7AT44_MOUSE Toll-interacting protein OS=Mus musculus OX=10090 GN=Tollip PE=1 SV=2;tr|A9JEI5|A9JEI5_MOUSE Toll-interacting protein OS=Mus musculus OX=1009	12.6726	12.9373	12.9322	13.53	13.5765	13.5221	6528.79	7843.6	7815.92	11828.7	12216.1	11764.1	0.619632	-0.690517	0.000572148	3.24249
Programmed cell death 6-interacting protein	Pdcd6ip	sp|Q9WU78|PDC6I_MOUSE Programmed cell death 6-interacting protein OS=Mus musculus OX=10090 GN=Pdcd6ip PE=1 SV=3	19.9069	20.1252	20.1496	21.7593	21.8474	22.1097	983046	1.14364e+06	1.16315e+06	3.54978e+06	3.77331e+06	4.52567e+06	0.277652	-1.84865	0.000688149	3.16232
DnaJ homolog subfamily A member 1	Dnaja1	sp|P63037|DNJA1_MOUSE DnaJ homolog subfamily A member 1 OS=Mus musculus OX=10090 GN=Dnaja1 PE=1 SV=1	15.7321	15.8579	15.6285	16.9903	17.0736	17.2887	54429.5	59388.7	50657.9	130194	137932	160110	0.384078	-1.38053	0.000702505	3.15335
Prostaglandin F2 receptor negative regulator	Ptgfrn	sp|Q9WV91|FPRP_MOUSE Prostaglandin F2 receptor negative regulator OS=Mus musculus OX=10090 GN=Ptgfrn PE=1 SV=2	15.9385	15.9814	16.2523	17.0453	17.2616	17.2528	62801	64696.5	78060.2	135253	157130	156175	0.458264	-1.12575	0.000709372	3.14913
Glycerophosphoinositol inositolphosphodiesterase GDPD2	Gdpd2	sp|Q9ESM6|GDPD2_MOUSE Glycerophosphoinositol inositolphosphodiesterase GDPD2 OS=Mus musculus OX=10090 GN=Gdpd2 PE=1 SV=1	11.8494	12.3244	11.8495	13.3278	13.3463	13.5531	3689.99	5128.78	3690.24	10281.8	10414.5	12019.6	0.382354	-1.38702	0.000791807	3.10138
Tyrosine-protein phosphatase non-receptor type 23	Ptpn23	sp|Q6PB44|PTN23_MOUSE Tyrosine-protein phosphatase non-receptor type 23 OS=Mus musculus OX=10090 GN=Ptpn23 PE=1 SV=2	14.006	14.0187	14.2238	15.2769	15.0228	15.2397	16452.3	16597.7	19133.3	39701.3	33290	38690.7	0.467249	-1.09774	0.000798475	3.09774
Neural cell adhesion molecule L1-like protein;Processed neural cell adhesion molecule L1-like protein	Chl1	sp|P70232|NCHL1_MOUSE Neural cell adhesion molecule L1-like protein OS=Mus musculus OX=10090 GN=Chl1 PE=1 SV=2	11.6079	11.7774	12.1182	12.8541	12.9387	13.0071	3121.23	3510.35	4445.72	7404.06	7851.21	8232.42	0.471622	-1.0843	0.000847723	3.07175
Poly(rC)-binding protein 2	Pcbp2	sp|Q61990|PCBP2_MOUSE Poly(rC)-binding protein 2 OS=Mus musculus OX=10090 GN=Pcbp2 PE=1 SV=1;tr|B2M1R7|B2M1R7_MOUSE Poly(rC)-binding protein 2 OS=Mus musculus OX=10090 GN=Pcbp2 PE=1 SV=1;tr|A0A2R8VI25|A0A2R8VI25_MOUSE Poly(rC)-binding protein 2 OS=Mus musc	17.0964	16.9034	17.1283	18.3827	18.2493	18.5727	140129	122583	143262	341778	311592	389888	0.389141	-1.36163	0.000855733	3.06766
Integrin beta	Itgb8	sp|Q0VBD0|ITB8_MOUSE Integrin beta-8 OS=Mus musculus OX=10090 GN=Itgb8 PE=1 SV=1	12.6732	12.9462	12.4134	13.739	13.7156	13.8624	6531.51	7892.14	5455.14	13672.6	13452.6	14893.5	0.473093	-1.0798	0.000906625	3.04257
Latexin	Lxn	sp|P70202|LXN_MOUSE Latexin OS=Mus musculus OX=10090 GN=Lxn PE=1 SV=2	12.2219	12.038	12.3086	13.2836	13.1888	13.0378	4777.04	4205.32	5072.92	9971.54	9337.37	8409.47	0.507074	-0.979731	0.000937894	3.02785
Thy-1 membrane glycoprotein	Thy1	sp|P01831|THY1_MOUSE Thy-1 membrane glycoprotein OS=Mus musculus OX=10090 GN=Thy1 PE=1 SV=1;tr|A0A1L1SUX8|A0A1L1SUX8_MOUSE Thy-1 membrane glycoprotein (Fragment) OS=Mus musculus OX=10090 GN=Thy1 PE=1 SV=1	12.1234	11.6813	12.1322	13.1651	12.9609	13.0934	4461.77	3284.14	4489.07	9185.23	7972.96	8739.89	0.472428	-1.08183	0.00102271	2.99025
Tetraspanin-14	Tspan14	sp|Q8QZY6|TSN14_MOUSE Tetraspanin-14 OS=Mus musculus OX=10090 GN=Tspan14 PE=1 SV=1	14.3593	14.8672	14.546	15.7272	15.9618	15.9797	21017.4	29886.4	23921.2	54244.9	63823.5	64620.3	0.409576	-1.2878	0.00105458	2.97692
Cytoplasmic protein NCK2	Nck2	sp|O55033|NCK2_MOUSE Cytoplasmic protein NCK2 OS=Mus musculus OX=10090 GN=Nck2 PE=1 SV=1;tr|A0A087WQT7|A0A087WQT7_MOUSE Cytoplasmic protein NCK2 (Fragment) OS=Mus musculus OX=10090 GN=Nck2 PE=4 SV=1;tr|A0A0J9YUK4|A0A0J9YUK4_MOUSE Cytoplasmic protein NCK2 (	13.2981	12.9531	13.4281	14.2975	14.2001	14.1299	10072.3	7929.97	11022	20136.1	18821.6	17927.7	0.510223	-0.9708	0.00114295	2.94197
Charged multivesicular body protein 2b;Coronin-2A;Coronin	Chmp2b;Coro2a	sp|Q8BJF9|CHM2B_MOUSE Charged multivesicular body protein 2b OS=Mus musculus OX=10090 GN=Chmp2b PE=1 SV=1;tr|A0A338P7L8|A0A338P7L8_MOUSE Charged multivesicular body protein 2b OS=Mus musculus OX=10090 GN=Chmp2b PE=1 SV=1;sp|Q8C0P5|COR2A_MOUSE Coronin-2A OS	13.814	13.8649	13.8586	14.572	14.7769	14.8466	14402.2	14919.4	14854.4	24356.2	28073.1	29462.7	0.539442	-0.89046	0.00120442	2.91922
Disintegrin and metalloproteinase domain-containing protein 15	Adam15	sp|O88839|ADA15_MOUSE Disintegrin and metalloproteinase domain-containing protein 15 OS=Mus musculus OX=10090 GN=Adam15 PE=1 SV=2	13.131	12.3837	13.2737	14.2212	14.3296	14.3149	8970.67	5343.98	9903.34	19098.9	20589.2	20380.5	0.403173	-1.31053	0.0012346	2.90847
Signal recognition particle 14 kDa protein;Signal recognition particle 14 kDa protein, N-terminally processed	Srp14	sp|P16254|SRP14_MOUSE Signal recognition particle 14 kDa protein OS=Mus musculus OX=10090 GN=Srp14 PE=1 SV=1;tr|A2AUM6|A2AUM6_MOUSE Signal recognition particle 14 kDa protein OS=Mus musculus OX=10090 GN=Srp14 PE=1 SV=1	12.4116	11.8873	12.755	14.8692	14.6719	15.1532	5448.34	3788.21	6912.54	29927.8	26102.5	36439.1	0.174642	-2.51752	0.00127605	2.89413
Charged multivesicular body protein 1b-1	Chmp1b1	sp|Q99LU0|CH1B1_MOUSE Charged multivesicular body protein 1b-1 OS=Mus musculus OX=10090 GN=Chmp1b1 PE=1 SV=1	12.4316	13.1583	12.9256	13.9133	13.971	14.0223	5524.39	9142.04	7780.25	15428.4	16057.9	16639.2	0.466419	-1.1003	0.00152901	2.81559
CD2-associated protein	Cd2ap	sp|Q9JLQ0|CD2AP_MOUSE CD2-associated protein OS=Mus musculus OX=10090 GN=Cd2ap PE=1 SV=3;tr|A0A3B2W812|A0A3B2W812_MOUSE CD2-associated protein OS=Mus musculus OX=10090 GN=Cd2ap PE=1 SV=1	15.8923	16.2236	16.4741	17.5018	17.2602	17.5102	60821.8	76522.7	91032.9	185595	156978	186679	0.43151	-1.21254	0.00154816	2.81018
Secretory carrier-associated membrane protein 2	Scamp2	sp|Q9ERN0|SCAM2_MOUSE Secretory carrier-associated membrane protein 2 OS=Mus musculus OX=10090 GN=Scamp2 PE=1 SV=1;tr|A0A1L1SUU4|A0A1L1SUU4_MOUSE Secretory carrier-associated membrane protein (Fragment) OS=Mus musculus OX=10090 GN=Scamp2 PE=1 SV=1	10.7819	10.4179	10.9489	11.7579	11.6245	11.6303	1760.66	1368.05	1976.73	3463.22	3157.35	3170.07	0.52146	-0.939371	0.00157205	2.80353
E3 ubiquitin-protein ligase MYCBP2	Mycbp2	sp|Q7TPH6|MYCB2_MOUSE E3 ubiquitin-protein ligase MYCBP2 OS=Mus musculus OX=10090 GN=Mycbp2 PE=1 SV=3;tr|F7CZG3|F7CZG3_MOUSE E3 ubiquitin-protein ligase MYCBP2 (Fragment) OS=Mus musculus OX=10090 GN=Mycbp2 PE=1 SV=1;tr|F6SMY7|F6SMY7_MOUSE E3 ubiquitin-prot	14.7144	15.0828	15.2108	17.2271	17.1621	17.6232	26882.9	34703.7	37923.4	153417	146658	201889	0.198241	-2.33467	0.00162493	2.78917
Neural Wiskott-Aldrich syndrome protein	Wasl	sp|Q91YD9|WASL_MOUSE Neural Wiskott-Aldrich syndrome protein OS=Mus musculus OX=10090 GN=Wasl PE=1 SV=1	14.7591	14.5405	15.0419	16.059	15.9714	16.2991	27728.8	23830.1	33733.6	68271.7	64249.6	80634	0.400143	-1.32141	0.00172118	2.76417
CD81 antigen	Cd81	sp|P35762|CD81_MOUSE CD81 antigen OS=Mus musculus OX=10090 GN=Cd81 PE=1 SV=2;tr|A0A140LJL0|A0A140LJL0_MOUSE CD81 antigen (Fragment) OS=Mus musculus OX=10090 GN=Cd81 PE=1 SV=1	15.9431	17.1071	16.4556	18.1213	18.217	18.3885	63001.6	141173	89873	285138	304694	343155	0.315168	-1.66581	0.00172996	2.76196
SUMO-activating enzyme subunit 2	Uba2	sp|Q9Z1F9|SAE2_MOUSE SUMO-activating enzyme subunit 2 OS=Mus musculus OX=10090 GN=Uba2 PE=1 SV=1;tr|H3BJQ2|H3BJQ2_MOUSE SUMO-activating enzyme subunit 2 (Fragment) OS=Mus musculus OX=10090 GN=Uba2 PE=1 SV=1	13.19	12.9874	13.0219	12.2671	12.2385	11.8398	9345.14	8120.77	8317.3	4929.07	4832.32	3665.51	1.92026	0.941305	0.0017699	2.75205
Poly(rC)-binding protein 1	Pcbp1	sp|P60335|PCBP1_MOUSE Poly(rC)-binding protein 1 OS=Mus musculus OX=10090 GN=Pcbp1 PE=1 SV=1	14.8756	14.8184	15.1672	16.1181	15.8294	15.9796	30060.9	28892.4	36794.4	71126.5	58227	64615.8	0.493623	-1.01852	0.00184015	2.73515
Neuroligin-2	Nlgn2	sp|Q69ZK9|NLGN2_MOUSE Neuroligin-2 OS=Mus musculus OX=10090 GN=Nlgn2 PE=1 SV=2	9.30396	9.61044	9.47243	10.4396	10.656	10.3566	632.079	781.683	710.372	1388.78	1613.52	1311.13	0.492446	-1.02196	0.00190564	2.71996
Vacuolar protein sorting-associated protein 37B	Vps37b	sp|Q8R0J7|VP37B_MOUSE Vacuolar protein sorting-associated protein 37B OS=Mus musculus OX=10090 GN=Vps37b PE=1 SV=1	15.591	16.1063	15.9407	17.3153	17.2962	17.6541	49358.1	70547.1	62896.8	163089	160944	206259	0.344719	-1.53651	0.00193567	2.71317
Ceruloplasmin	Cp	sp|Q61147|CERU_MOUSE Ceruloplasmin OS=Mus musculus OX=10090 GN=Cp PE=1 SV=2;tr|G3X9T8|G3X9T8_MOUSE Ceruloplasmin OS=Mus musculus OX=10090 GN=Cp PE=1 SV=1;tr|G3X8Q5|G3X8Q5_MOUSE Ceruloplasmin OS=Mus musculus OX=10090 GN=Cp PE=1 SV=1;tr|E9PZD8|E9PZD8_MOUSE C	12.9474	12.2902	13.1994	14.2729	14.6402	14.4517	7898.7	5008.63	9406.22	19795.7	25535.2	22407.6	0.329407	-1.60206	0.00196759	2.70607
Polyadenylate-binding protein	Pabpc4	tr|Q6PHQ9|Q6PHQ9_MOUSE Polyadenylate-binding protein OS=Mus musculus OX=10090 GN=Pabpc4 PE=1 SV=1;tr|Q91YZ8|Q91YZ8_MOUSE Polyadenylate-binding protein OS=Mus musculus OX=10090 GN=Pabpc4 PE=1 SV=1;tr|A3KFU5|A3KFU5_MOUSE Polyadenylate-binding protein OS=Mus	15.9255	16.1064	16.2964	17.6402	17.6414	18.0242	62237.7	70552	80483.2	204282	204452	266578	0.315814	-1.66285	0.00197447	2.70455
Casein kinase I isoform alpha	Csnk1a1	sp|Q8BK63|KC1A_MOUSE Casein kinase I isoform alpha OS=Mus musculus OX=10090 GN=Csnk1a1 PE=1 SV=2;tr|H7BXB1|H7BXB1_MOUSE Casein kinase I isoform alpha OS=Mus musculus OX=10090 GN=Csnk1a1 PE=1 SV=1;tr|E9Q4G7|E9Q4G7_MOUSE Casein kinase I isoform alpha OS=Mus	11.7558	11.673	11.2699	12.4484	12.5496	12.6866	3458.19	3265.3	2469.32	5589.1	5995.23	6592.45	0.505745	-0.983519	0.00204789	2.68869
E3 ubiquitin-protein ligase makorin-1;Probable E3 ubiquitin-protein ligase makorin-3	Mkrn1;Mkrn3	sp|Q9QXP6|MKRN1_MOUSE E3 ubiquitin-protein ligase makorin-1 OS=Mus musculus OX=10090 GN=Mkrn1 PE=1 SV=1;tr|Q99LD7|Q99LD7_MOUSE E3 ubiquitin-protein ligase makorin-1 OS=Mus musculus OX=10090 GN=Mkrn1 PE=1 SV=1;tr|F6S742|F6S742_MOUSE E3 ubiquitin-protein lig	12.6261	12.2905	12.7337	13.8319	13.6481	13.5209	6321.71	5009.67	6811.23	14582	12837.7	11754.3	0.463129	-1.11051	0.00204974	2.6883
Wolframin	Wfs1	sp|P56695|WFS1_MOUSE Wolframin OS=Mus musculus OX=10090 GN=Wfs1 PE=1 SV=1;tr|Q3UN10|Q3UN10_MOUSE Wolframin OS=Mus musculus OX=10090 GN=Wfs1 PE=1 SV=1	11.9173	11.4232	11.3519	12.6312	12.809	12.9141	3867.81	2746.16	2613.74	6344.1	7176.18	7718.47	0.434475	-1.20266	0.00207853	2.68224
NEDD4-binding protein 1	N4bp1	sp|Q6A037|N4BP1_MOUSE NEDD4-binding protein 1 OS=Mus musculus OX=10090 GN=N4bp1 PE=1 SV=2	11.8583	11.5377	11.5585	12.9191	12.5849	12.7281	3712.82	2972.99	3016.17	7745.27	6143.73	6784.84	0.469287	-1.09146	0.00220833	2.65594
Ras-related protein R-Ras	Rras	sp|P10833|RRAS_MOUSE Ras-related protein R-Ras OS=Mus musculus OX=10090 GN=Rras PE=1 SV=1	13.5236	13.8808	13.9754	14.5441	14.6205	14.7179	11776.3	15084.7	16107	23889.7	25188.9	26948.2	0.56517	-0.823244	0.00221757	2.65412
G-protein coupled receptor family C group 5 member B	Gprc5b	sp|Q923Z0|GPC5B_MOUSE G-protein coupled receptor family C group 5 member B OS=Mus musculus OX=10090 GN=Gprc5b PE=1 SV=1;tr|D2DFA9|D2DFA9_MOUSE G protein-coupled receptor family C group 5 member B variant 2 OS=Mus musculus OX=10090 GN=Gprc5b PE=1 SV=1	15.5835	15.9357	15.624	17.3067	17.1755	17.6267	49102.2	62679.2	50500.1	162120	148027	202379	0.316631	-1.65912	0.00227584	2.64286
Voltage-dependent calcium channel gamma-5 subunit	Cacng5	sp|Q8VHW4|CCG5_MOUSE Voltage-dependent calcium channel gamma-5 subunit OS=Mus musculus OX=10090 GN=Cacng5 PE=1 SV=1	12.9141	13.2704	13.6343	14.9294	15.4232	15.3444	7718.47	9880.72	12715.5	31203.1	43938.6	41603	0.259667	-1.94527	0.0023091	2.63656
Acidic leucine-rich nuclear phosphoprotein 32 family member A;Putative acidic leucine-rich nuclear phosphoprotein 32 family member C	Anp32a;Anp32c	sp|O35381|AN32A_MOUSE Acidic leucine-rich nuclear phosphoprotein 32 family member A OS=Mus musculus OX=10090 GN=Anp32a PE=1 SV=1;tr|F6UFG6|F6UFG6_MOUSE Acidic leucine-rich nuclear phosphoprotein 32 family member A (Fragment) OS=Mus musculus OX=10090 GN=Anp	15.301	15.2116	15.1329	14.4712	14.0702	13.7218	40370.1	37944.4	35930	22712.5	17200.9	13510.6	2.13845	1.09656	0.00239585	2.62054
Tumor susceptibility gene 101 protein	Tsg101	sp|Q61187|TS101_MOUSE Tumor susceptibility gene 101 protein OS=Mus musculus OX=10090 GN=Tsg101 PE=1 SV=2;tr|A0A1B0GS09|A0A1B0GS09_MOUSE Tumor susceptibility gene 101 protein (Fragment) OS=Mus musculus OX=10090 GN=Tsg101 PE=1 SV=1	16.7022	16.6314	16.8073	18.0503	18.0068	18.4121	106626	101520	114684	271445	263383	348814	0.36534	-1.45269	0.00244673	2.61141
Coiled-coil and C2 domain-containing protein 1B	Cc2d1b	sp|Q8BRN9|C2D1B_MOUSE Coiled-coil and C2 domain-containing protein 1B OS=Mus musculus OX=10090 GN=Cc2d1b PE=1 SV=1;tr|F6XC25|F6XC25_MOUSE Coiled-coil and C2 domain-containing protein 1B (Fragment) OS=Mus musculus OX=10090 GN=Cc2d1b PE=1 SV=1	14.2091	14.0764	14.6502	15.4994	15.525	15.2758	18939.4	17275	25712.8	46321.7	47151	39671.1	0.465115	-1.10434	0.00247123	2.60709
Protocadherin beta-14	Pcdhb14	sp|Q6PB90|PCDBE_MOUSE Protocadherin beta-14 OS=Mus musculus OX=10090 GN=Pcdhb14 PE=1 SV=2	11.9128	11.5762	12.0003	12.8361	13.07	13.2143	3855.76	3053.4	4096.85	7312.25	8599.28	9503.87	0.433045	-1.20741	0.00248811	2.60413
Peptidyl-prolyl cis-trans isomerase FKBP1A;Peptidyl-prolyl cis-trans isomerase	Fkbp1a	sp|P26883|FKB1A_MOUSE Peptidyl-prolyl cis-trans isomerase FKBP1A OS=Mus musculus OX=10090 GN=Fkbp1a PE=1 SV=2;tr|F6X9I3|F6X9I3_MOUSE Peptidylprolyl isomerase (Fragment) OS=Mus musculus OX=10090 GN=Fkbp1a PE=1 SV=1	13.4756	13.2511	13.8727	14.7866	14.8129	15.1127	11390.9	9749.42	15000.3	28262.5	28782.4	35430.4	0.390814	-1.35545	0.00250574	2.60106
Heterogeneous nuclear ribonucleoprotein D0	Hnrnpd	sp|Q60668|HNRPD_MOUSE Heterogeneous nuclear ribonucleoprotein D0 OS=Mus musculus OX=10090 GN=Hnrnpd PE=1 SV=2;tr|E9Q5B6|E9Q5B6_MOUSE Heterogeneous nuclear ribonucleoprotein D0 (Fragment) OS=Mus musculus OX=10090 GN=Hnrnpd PE=1 SV=1;tr|F6ZV59|F6ZV59_MOUSE H	14.4764	14.3395	14.0912	13.162	13.3078	12.9802	22794.5	20731	17453.2	9165.51	10140.2	8080.34	2.22663	1.15486	0.00254639	2.59408
Cleavage and polyadenylation specificity factor subunit 6	Cpsf6	sp|Q6NVF9|CPSF6_MOUSE Cleavage and polyadenylation specificity factor subunit 6 OS=Mus musculus OX=10090 GN=Cpsf6 PE=1 SV=1;tr|H3BJ30|H3BJ30_MOUSE Cleavage and polyadenylation-specificity factor subunit 6 OS=Mus musculus OX=10090 GN=Cpsf6 PE=1 SV=1;tr|H3BJ	11.976	11.9444	11.5602	12.5443	12.7351	12.7317	4028.42	3941.15	3019.72	5973.25	6817.84	6801.8	0.560882	-0.834231	0.00254753	2.59388
Vacuolar protein sorting-associated protein 28 homolog	Vps28	sp|Q9D1C8|VPS28_MOUSE Vacuolar protein sorting-associated protein 28 homolog OS=Mus musculus OX=10090 GN=Vps28 PE=1 SV=1;tr|A0A2R8VKS6|A0A2R8VKS6_MOUSE Vacuolar protein sorting-associated protein 28 homolog OS=Mus musculus OX=10090 GN=Vps28 PE=1 SV=1	16.4401	16.5602	16.4736	17.4526	17.4907	17.7988	88912.6	96631.1	91001.3	179373	184173	228020	0.46748	-1.09702	0.00256726	2.59053
RNA-binding protein 3	Rbm3	sp|O89086|RBM3_MOUSE RNA-binding protein 3 OS=Mus musculus OX=10090 GN=Rbm3 PE=1 SV=1;tr|Q8BG13|Q8BG13_MOUSE RNA-binding protein 3 OS=Mus musculus OX=10090 GN=Rbm3 PE=1 SV=1;tr|S4R2M6|S4R2M6_MOUSE RNA-binding protein 3 OS=Mus musculus OX=10090 GN=Rbm3 PE=1	10.2394	10.8453	10.8849	11.7157	11.9075	12.025	1208.83	1839.76	1890.96	3363.39	3841.62	4167.6	0.434337	-1.20311	0.00259215	2.58634
TOM1-like protein 2	Tom1l2	sp|Q5SRX1|TM1L2_MOUSE TOM1-like protein 2 OS=Mus musculus OX=10090 GN=Tom1l2 PE=1 SV=1;tr|Q5SXA5|Q5SXA5_MOUSE TOM1-like protein 2 OS=Mus musculus OX=10090 GN=Tom1l2 PE=1 SV=1;tr|Q5SXA4|Q5SXA4_MOUSE TOM1-like protein 2 OS=Mus musculus OX=10090 GN=Tom1l2 PE=	13.3546	13.4393	14.0911	14.8399	14.7577	14.9324	10474.5	11107.9	17451.9	29326.1	27702	31268	0.442085	-1.1776	0.00259712	2.58551
Ras-related protein Rab-13	Rab13	sp|Q9DD03|RAB13_MOUSE Ras-related protein Rab-13 OS=Mus musculus OX=10090 GN=Rab13 PE=1 SV=1;tr|D3YUS4|D3YUS4_MOUSE Ras-related protein Rab-13 OS=Mus musculus OX=10090 GN=Rab13 PE=1 SV=1	15.7039	16.0078	15.8931	16.657	16.9843	16.9288	53375.9	65891.3	60855.5	103337	129653	124760	0.503486	-0.989976	0.0026082	2.58366
Ras-related protein Rab-23	Rab23	sp|P35288|RAB23_MOUSE Ras-related protein Rab-23 OS=Mus musculus OX=10090 GN=Rab23 PE=1 SV=2;tr|Q9D4I9|Q9D4I9_MOUSE Ras-related protein Rab-23 OS=Mus musculus OX=10090 GN=Rab23 PE=1 SV=1;tr|M0QWL7|M0QWL7_MOUSE Ras-related protein Rab-23 OS=Mus musculus OX=	12.0726	12.5247	12.8743	13.544	13.5914	13.5598	4307.4	5892.65	7508.45	11944	12343	12075.5	0.486999	-1.03801	0.00261788	2.58205
Cation-dependent mannose-6-phosphate receptor	M6pr	sp|P24668|MPRD_MOUSE Cation-dependent mannose-6-phosphate receptor OS=Mus musculus OX=10090 GN=M6pr PE=1 SV=1	12.5411	12.1269	12.4115	13.3753	13.1921	13.1348	5960.01	4472.61	5447.96	10625.9	9358.75	8994.33	0.548003	-0.867744	0.00269798	2.56896
Erythrocyte band 7 integral membrane protein	Stom	sp|P54116|STOM_MOUSE Erythrocyte band 7 integral membrane protein OS=Mus musculus OX=10090 GN=Stom PE=1 SV=3	12.8869	13.1981	13.4079	14.2615	14.6738	14.562	7574.32	9397.75	10868.8	19639.9	26136.9	24187.9	0.397927	-1.32943	0.00282899	2.54837
Rho-related GTP-binding protein RhoG	Rhog	sp|P84096|RHOG_MOUSE Rho-related GTP-binding protein RhoG OS=Mus musculus OX=10090 GN=Rhog PE=1 SV=1	14.2104	14.2394	14.6308	15.455	15.1816	15.4283	18956.4	19341.3	25369.4	44917.8	37163.5	44094.2	0.504592	-0.986811	0.00293337	2.53263
Vacuolar protein-sorting-associated protein 25	Vps25	sp|Q9CQ80|VPS25_MOUSE Vacuolar protein-sorting-associated protein 25 OS=Mus musculus OX=10090 GN=Vps25 PE=1 SV=1;tr|A2A4J8|A2A4J8_MOUSE Vacuolar protein-sorting-associated protein 25 OS=Mus musculus OX=10090 GN=Vps25 PE=1 SV=1;tr|A2A4K0|A2A4K0_MOUSE Vacuol	13.0196	13.2105	13.3107	14.1824	14.1936	14.5191	8304.05	9478.87	10160.6	18592.1	18737	23479.3	0.459535	-1.12175	0.0029488	2.53035
60S ribosomal protein L5	Rpl5	sp|P47962|RL5_MOUSE 60S ribosomal protein L5 OS=Mus musculus OX=10090 GN=Rpl5 PE=1 SV=3;tr|D3YYV8|D3YYV8_MOUSE 60S ribosomal protein L5 (Fragment) OS=Mus musculus OX=10090 GN=Rpl5 PE=1 SV=1	15.355	15.0418	14.9214	13.8639	13.1125	13.2344	41909.8	33731.3	31030.5	14909	8856.37	9637.21	3.19351	1.67514	0.00296329	2.52823
Polyadenylate-binding protein 1	Pabpc1	sp|P29341|PABP1_MOUSE Polyadenylate-binding protein 1 OS=Mus musculus OX=10090 GN=Pabpc1 PE=1 SV=2	19.2569	19.5974	19.5698	21.2281	21.145	21.6456	626476	793241	778210	2.45638e+06	2.31889e+06	3.28076e+06	0.27283	-1.87392	0.00305803	2.51456
Growth arrest-specific protein 7	Gas7	sp|Q60780|GAS7_MOUSE Growth arrest-specific protein 7 OS=Mus musculus OX=10090 GN=Gas7 PE=1 SV=1;tr|B1ATI9|B1ATI9_MOUSE Growth arrest-specific protein 7 OS=Mus musculus OX=10090 GN=Gas7 PE=1 SV=1;tr|Q3U432|Q3U432_MOUSE Growth arrest-specific protein 7 OS=M	11.2478	11.9292	11.9124	12.711	12.6329	12.7666	2431.79	3899.84	3854.69	6704.9	6351.58	6968.34	0.508685	-0.975157	0.00309719	2.50903
Peptidyl-prolyl cis-trans isomerase C	Ppic	sp|P30412|PPIC_MOUSE Peptidyl-prolyl cis-trans isomerase C OS=Mus musculus OX=10090 GN=Ppic PE=1 SV=1	10.5018	8.78604	10.8666	11.9528	12.023	11.9172	1449.96	441.43	1867.12	3964.16	4161.82	3867.54	0.313379	-1.67402	0.00314263	2.50271
Leukocyte surface antigen CD47	Cd47	tr|A0A2R8VI30|A0A2R8VI30_MOUSE Leukocyte surface antigen CD47 OS=Mus musculus OX=10090 GN=Cd47 PE=1 SV=1;tr|A0A2R8VK70|A0A2R8VK70_MOUSE Leukocyte surface antigen CD47 OS=Mus musculus OX=10090 GN=Cd47 PE=1 SV=1;tr|A0A2R8W6P0|A0A2R8W6P0_MOUSE Leukocyte surfa	12.6363	13.1093	13.4178	14.1228	14.145	14.337	6366.57	8836.75	10943.6	17839.7	18116.3	20695.1	0.461544	-1.11546	0.00317853	2.49777
Disintegrin and metalloproteinase domain-containing protein 9	Adam9	sp|Q61072|ADAM9_MOUSE Disintegrin and metalloproteinase domain-containing protein 9 OS=Mus musculus OX=10090 GN=Adam9 PE=1 SV=2;tr|A0A140LHU0|A0A140LHU0_MOUSE Disintegrin and metalloproteinase domain-containing protein 9 OS=Mus musculus OX=10090 GN=Adam9 P	13.9592	14.3808	14.3582	15.2349	15.3317	15.5983	15927.1	21333	21001.4	38562.2	41238.4	49608.5	0.450212	-1.15132	0.00322686	2.49122
Charged multivesicular body protein 6	Chmp6	sp|P0C0A3|CHMP6_MOUSE Charged multivesicular body protein 6 OS=Mus musculus OX=10090 GN=Chmp6 PE=1 SV=2;tr|B1AZ42|B1AZ42_MOUSE Charged multivesicular body protein 6 (Fragment) OS=Mus musculus OX=10090 GN=Chmp6 PE=1 SV=1;tr|B1AZ41|B1AZ41_MOUSE Charged multi	12.2148	12.5568	12.2063	13.7092	13.5553	13.2973	4753.58	6025.23	4725.66	13393.1	12037.9	10066.7	0.436774	-1.19504	0.00323006	2.49079
Kelch-like ECH-associated protein 1	Keap1	sp|Q9Z2X8|KEAP1_MOUSE Kelch-like ECH-associated protein 1 OS=Mus musculus OX=10090 GN=Keap1 PE=1 SV=1;tr|A0A1L1SS10|A0A1L1SS10_MOUSE Kelch-like ECH-associated protein 1 OS=Mus musculus OX=10090 GN=Keap1 PE=1 SV=1	13.4048	13.317	13.9243	14.8515	14.797	15.163	10845.4	10205.1	15546.5	29562.9	28466.9	36687.5	0.386381	-1.3719	0.0032572	2.48716
Integrin alpha-7;Integrin alpha-7 heavy chain;Integrin alpha-7 light chain	Itga7	sp|Q61738|ITA7_MOUSE Integrin alpha-7 OS=Mus musculus OX=10090 GN=Itga7 PE=1 SV=3;tr|G3X9Q1|G3X9Q1_MOUSE Integrin alpha-7 OS=Mus musculus OX=10090 GN=Itga7 PE=1 SV=1;tr|Q3TZS3|Q3TZS3_MOUSE Integrin alpha-7 OS=Mus musculus OX=10090 GN=Itga7 PE=1 SV=1	16.3118	16.9326	17.2498	18.2528	18.7017	18.473	81346.9	125089	155850	312349	426356	363854	0.328587	-1.60565	0.00332149	2.47867
Disintegrin and metalloproteinase domain-containing protein 12	Adam12	sp|Q61824|ADA12_MOUSE Disintegrin and metalloproteinase domain-containing protein 12 OS=Mus musculus OX=10090 GN=Adam12 PE=1 SV=2;tr|F6YWH6|F6YWH6_MOUSE Disintegrin and metalloproteinase domain-containing protein 12 (Fragment) OS=Mus musculus OX=10090 GN=A	8.92184	9.17523	8.62017	10.3427	9.93875	10.2581	485	578.122	393.486	1298.56	981.436	1224.6	0.415627	-1.26664	0.00338624	2.47028
Integrin alpha-2	Itga2	sp|Q62469|ITA2_MOUSE Integrin alpha-2 OS=Mus musculus OX=10090 GN=Itga2 PE=1 SV=2	13.3836	13.6134	13.9051	14.5876	14.8957	14.9572	10687.2	12532.6	15340.9	24621	30482.6	31810.2	0.443667	-1.17245	0.00339554	2.46909
G-protein coupled receptor-associated sorting protein 1	Gprasp1	sp|Q5U4C1|GASP1_MOUSE G-protein coupled receptor-associated sorting protein 1 OS=Mus musculus OX=10090 GN=Gprasp1 PE=1 SV=1	14.5274	14.2541	14.5665	15.3572	15.2022	15.5387	23614.7	19539.4	24263.5	41973.8	37698	47600.9	0.529711	-0.916724	0.00347446	2.45911
Cordon-bleu protein-like 1	Cobll1	sp|Q3UMF0|COBL1_MOUSE Cordon-bleu protein-like 1 OS=Mus musculus OX=10090 GN=Cobll1 PE=1 SV=2;tr|B1AZ15|B1AZ15_MOUSE Cordon-bleu protein-like 1 OS=Mus musculus OX=10090 GN=Cobll1 PE=1 SV=1;tr|B1AZ14|B1AZ14_MOUSE Cordon-bleu protein-like 1 OS=Mus musculus O	15.381	15.3204	15.3499	16.4128	16.5432	16.8627	42671.9	40916.6	41761.9	87245.9	95499.1	119173	0.41518	-1.26819	0.00356178	2.44833
High affinity cationic amino acid transporter 1	Slc7a1	sp|Q09143|SL7A1_MOUSE High affinity cationic amino acid transporter 1 OS=Mus musculus OX=10090 GN=Slc7a1 PE=1 SV=1;tr|E9Q3N1|E9Q3N1_MOUSE High affinity cationic amino acid transporter 1 (Fragment) OS=Mus musculus OX=10090 GN=Slc7a1 PE=1 SV=8;tr|D3Z161|D3Z1	11.4899	12.1991	12.2908	13.3537	13.0886	13.1458	2876.1	4702.13	5010.71	10468	8710.86	9063.17	0.445752	-1.16569	0.00365497	2.43712
Cofilin-1	Cfl1	sp|P18760|COF1_MOUSE Cofilin-1 OS=Mus musculus OX=10090 GN=Cfl1 PE=1 SV=3;tr|F8WGL3|F8WGL3_MOUSE Cofilin-1 OS=Mus musculus OX=10090 GN=Cfl1 PE=1 SV=1;tr|A0A494B9A7|A0A494B9A7_MOUSE Cofilin-1 OS=Mus musculus OX=10090 GN=Cfl1 PE=1 SV=1	17.1626	17.9843	17.6191	18.7483	18.5862	18.8065	146709	259307	201316	440353	393553	458480	0.46993	-1.08948	0.00379698	2.42056
Coiled-coil domain-containing protein 50	Ccdc50	sp|Q810U5|CCD50_MOUSE Coiled-coil domain-containing protein 50 OS=Mus musculus OX=10090 GN=Ccdc50 PE=1 SV=1;tr|F6UK66|F6UK66_MOUSE Coiled-coil domain-containing protein 50 (Fragment) OS=Mus musculus OX=10090 GN=Ccdc50 PE=1 SV=1;tr|A0A668KL36|A0A668KL36_MOU	13.734	14.0833	14.2832	15.1107	15.2372	15.5174	13625.3	17357.8	19937.5	35381.3	38623.7	46903.2	0.421151	-1.24759	0.00388577	2.41052
Huntingtin-interacting protein 1	Hip1	sp|Q8VD75|HIP1_MOUSE Huntingtin-interacting protein 1 OS=Mus musculus OX=10090 GN=Hip1 PE=1 SV=2;tr|A0A0J9YUA3|A0A0J9YUA3_MOUSE Huntingtin-interacting protein 1 (Fragment) OS=Mus musculus OX=10090 GN=Hip1 PE=1 SV=1	16.3152	16.2331	16.373	17.0559	16.9781	16.7768	81538.9	77028.2	84871.9	136250	129097	112285	0.644646	-0.633421	0.00388778	2.4103
CUGBP Elav-like family member 2	Celf2	sp|Q9Z0H4|CELF2_MOUSE CUGBP Elav-like family member 2 OS=Mus musculus OX=10090 GN=Celf2 PE=1 SV=1;tr|A0A0R4J2B0|A0A0R4J2B0_MOUSE CUGBP Elav-like family member 2 OS=Mus musculus OX=10090 GN=Celf2 PE=1 SV=1;tr|V9GX43|V9GX43_MOUSE CUGBP Elav-like family membe	13.9282	14.1813	13.8843	14.9274	14.9584	15.28	15588.6	18577.9	15121.4	31159.8	31836.6	39786.7	0.479532	-1.0603	0.00389156	2.40988
Constitutive coactivator of PPAR-gamma-like protein 1	FAM120A	sp|Q6A0A9|F120A_MOUSE Constitutive coactivator of PPAR-gamma-like protein 1 OS=Mus musculus OX=10090 GN=FAM120A PE=1 SV=2	12.4602	12.2865	12.5117	13.257	12.9951	13.0514	5635	4995.8	5839.79	9789.37	8164.22	8489.12	0.622878	-0.682978	0.00398025	2.40009
Dedicator of cytokinesis protein 7	Dock7	sp|Q8R1A4|DOCK7_MOUSE Dedicator of cytokinesis protein 7 OS=Mus musculus OX=10090 GN=Dock7 PE=1 SV=3;tr|E9PX48|E9PX48_MOUSE Dedicator of cytokinesis protein 7 OS=Mus musculus OX=10090 GN=Dock7 PE=1 SV=2;tr|A0A0U1RNK7|A0A0U1RNK7_MOUSE Dedicator of cytokines	12.3308	11.9468	12.2358	13.0932	13.5037	13.4857	5151.58	3947.71	4823.28	8738.68	11615	11471	0.437478	-1.19272	0.00399442	2.39855
LIM zinc-binding domain-containing Nebulette	Nebl	sp|Q9DC07|LNEBL_MOUSE LIM zinc-binding domain-containing Nebulette OS=Mus musculus OX=10090 GN=Nebl PE=1 SV=1	12.7636	12.1911	12.5539	13.5976	13.3872	13.733	6953.87	4676.13	6013.13	12396.1	10713.9	13615.9	0.4804	-1.05769	0.00401308	2.39652
Immunoglobulin superfamily member 8	Igsf8	sp|Q8R366|IGSF8_MOUSE Immunoglobulin superfamily member 8 OS=Mus musculus OX=10090 GN=Igsf8 PE=1 SV=2;tr|G3UYZ1|G3UYZ1_MOUSE Immunoglobulin superfamily member 8 OS=Mus musculus OX=10090 GN=Igsf8 PE=1 SV=1;tr|A0A0R4J117|A0A0R4J117_MOUSE Immunoglobulin super	16.7971	17.175	17.0676	17.6512	17.9279	17.8822	113876	147976	137360	205845	249365	241590	0.572921	-0.803593	0.00408592	2.38871
DnaJ homolog subfamily A member 2	Dnaja2	sp|Q9QYJ0|DNJA2_MOUSE DnaJ homolog subfamily A member 2 OS=Mus musculus OX=10090 GN=Dnaja2 PE=1 SV=1	14.9946	15.0695	14.7419	15.8103	15.9661	16.2148	32645.6	34385.2	27400.2	57461.2	64014	76057.3	0.478053	-1.06476	0.00415843	2.38107
Heat shock cognate 71 kDa protein	Hspa8	sp|P63017|HSP7C_MOUSE Heat shock cognate 71 kDa protein OS=Mus musculus OX=10090 GN=Hspa8 PE=1 SV=1;tr|Q504P4|Q504P4_MOUSE Heat shock cognate 71 kDa protein OS=Mus musculus OX=10090 GN=Hspa8 PE=1 SV=1	19.9394	20.0989	19.7688	20.5836	20.7497	20.8963	1.00544e+06	1.12298e+06	893309	1.57138e+06	1.76312e+06	1.9517e+06	0.571626	-0.806856	0.00416712	2.38016
Multifunctional protein ADE2;Phosphoribosylaminoimidazole-succinocarboxamide synthase;Phosphoribosylaminoimidazole carboxylase	Paics	sp|Q9DCL9|PUR6_MOUSE Multifunctional protein ADE2 OS=Mus musculus OX=10090 GN=Paics PE=1 SV=4	14.7403	14.7989	14.7988	14.293	14.067	13.7355	27369.9	28504.5	28502.5	20073.4	17162.8	13639.5	1.65849	0.729868	0.00417216	2.37964
BAG family molecular chaperone regulator 5	Bag5	sp|Q8CI32|BAG5_MOUSE BAG family molecular chaperone regulator 5 OS=Mus musculus OX=10090 GN=Bag5 PE=1 SV=1	13.3479	12.9575	13.2303	14.1409	14.5102	14.1877	10426	7954.19	9609.86	18064.9	23334.9	18660.5	0.466033	-1.1015	0.0041804	2.37878
Syntaxin-4	Stx4	sp|P70452|STX4_MOUSE Syntaxin-4 OS=Mus musculus OX=10090 GN=Stx4 PE=1 SV=1	10.9874	11.3284	10.7432	12.6204	12.4102	12.1421	2030.19	2571.51	1714.06	6296.79	5443.05	4519.98	0.388427	-1.36428	0.00437724	2.3588
eIF-2-alpha kinase activator GCN1	Gcn1l1	sp|E9PVA8|GCN1_MOUSE eIF-2-alpha kinase activator GCN1 OS=Mus musculus OX=10090 GN=Gcn1 PE=1 SV=1	23.1192	22.9593	23.6209	25.2523	25.4037	25.8668	9.11114e+06	8.15526e+06	1.29003e+07	3.99668e+07	4.4389e+07	6.11903e+07	0.207265	-2.27045	0.00438048	2.35848
Putative helicase MOV-10	Mov10	sp|P23249|MOV10_MOUSE Putative helicase MOV-10 OS=Mus musculus OX=10090 GN=Mov10 PE=1 SV=2;tr|D3Z3E8|D3Z3E8_MOUSE Putative helicase MOV-10 OS=Mus musculus OX=10090 GN=Mov10 PE=1 SV=1;tr|E9PW39|E9PW39_MOUSE Putative helicase MOV-10 OS=Mus musculus OX=10090	13.3945	12.9248	13.4664	14.1544	14.0843	14.3515	10768.3	7775.93	11318.5	18234.7	17369.9	20904.1	0.528463	-0.920126	0.00438697	2.35784
Integrin alpha-V;Integrin alpha-V heavy chain;Integrin alpha-V light chain	Itgav	sp|P43406|ITAV_MOUSE Integrin alpha-V OS=Mus musculus OX=10090 GN=Itgav PE=1 SV=2;tr|A2AKI5|A2AKI5_MOUSE Integrin alpha-V OS=Mus musculus OX=10090 GN=Itgav PE=1 SV=1	14.4606	14.9652	14.8909	15.4903	15.7466	15.6826	22546.3	31987	30381.4	46030.4	54979.3	52593.6	0.552818	-0.855123	0.00443578	2.35303
SH3 and PX domain-containing protein 2B	Sh3pxd2b	sp|A2AAY5|SPD2B_MOUSE SH3 and PX domain-containing protein 2B OS=Mus musculus OX=10090 GN=Sh3pxd2b PE=1 SV=1;tr|A0A5F8MPP7|A0A5F8MPP7_MOUSE SH3 and PX domain-containing protein 2B OS=Mus musculus OX=10090 GN=Sh3pxd2b PE=1 SV=1	10.7837	11.1759	10.6562	11.5916	11.6541	11.7372	1762.86	2313.56	1613.75	3086.17	3222.8	3413.89	0.585236	-0.772909	0.00448591	2.34815
Tetraspanin;Tetraspanin-6	Tspan6	tr|Q99L96|Q99L96_MOUSE Tetraspanin OS=Mus musculus OX=10090 GN=Tspan6 PE=1 SV=1;sp|O70401|TSN6_MOUSE Tetraspanin-6 OS=Mus musculus OX=10090 GN=Tspan6 PE=1 SV=1;tr|H3BL26|H3BL26_MOUSE Tetraspanin-6 (Fragment) OS=Mus musculus OX=10090 GN=Tspan6 PE=1 SV=8	13.4343	13.3878	13.5989	14.2985	14.7499	14.6036	11069.5	10718.4	12407.3	20150.1	27552.6	24895.5	0.471019	-1.08614	0.00452879	2.34402
Cadherin-2	Cdh2	sp|P15116|CADH2_MOUSE Cadherin-2 OS=Mus musculus OX=10090 GN=Cdh2 PE=1 SV=2;tr|D3YYT0|D3YYT0_MOUSE Cadherin-2 OS=Mus musculus OX=10090 GN=Cdh2 PE=1 SV=1	11.4753	10.5855	10.734	12.2844	12.2772	12.6115	2847.14	1536.57	1703.16	4988.53	4963.7	6258.06	0.375495	-1.41314	0.00472647	2.32546
SH3 domain-containing kinase-binding protein 1	Sh3kbp1	sp|Q8R550|SH3K1_MOUSE SH3 domain-containing kinase-binding protein 1 OS=Mus musculus OX=10090 GN=Sh3kbp1 PE=1 SV=1;tr|E9Q0C1|E9Q0C1_MOUSE SH3 domain-containing kinase-binding protein 1 OS=Mus musculus OX=10090 GN=Sh3kbp1 PE=1 SV=1	15.0965	15.0281	15.5499	16.109	16.3277	16.4805	35034.8	33412.5	47971.8	70679.3	82248.4	91437.6	0.476414	-1.06971	0.00488137	2.31146
Voltage-dependent calcium channel subunit alpha-2/delta-1;Voltage-dependent calcium channel subunit alpha-2-1;Voltage-dependent calcium channel subunit delta-1	Cacna2d1	sp|O08532|CA2D1_MOUSE Voltage-dependent calcium channel subunit alpha-2/delta-1 OS=Mus musculus OX=10090 GN=Cacna2d1 PE=1 SV=1;tr|E9Q1X8|E9Q1X8_MOUSE Voltage-dependent calcium channel subunit alpha-2/delta-1 OS=Mus musculus OX=10090 GN=Cacna2d1 PE=1 SV=2	13.077	13.2156	13.9162	14.56	14.9298	14.8847	8641.1	9512.44	15459.4	24154.4	31211.7	30251.1	0.392596	-1.34888	0.00488964	2.31072
Sodium-coupled neutral amino acid transporter 3	Slc38a3	sp|Q9DCP2|S38A3_MOUSE Sodium-coupled neutral amino acid transporter 3 OS=Mus musculus OX=10090 GN=Slc38a3 PE=1 SV=1;tr|A0A0A6YWH4|A0A0A6YWH4_MOUSE Sodium-coupled neutral amino acid transporter 3 (Fragment) OS=Mus musculus OX=10090 GN=Slc38a3 PE=1 SV=1;tr|A	13.331	13.4866	13.6844	14.0544	14.2351	14.3116	10304.6	11478.1	13164.8	17013.6	19283.8	20333.9	0.617107	-0.696408	0.00490138	2.30968
Polyadenylate-binding protein-interacting protein 1	Paip1	tr|F6Y616|F6Y616_MOUSE Polyadenylate-binding protein-interacting protein 1 OS=Mus musculus OX=10090 GN=Paip1 PE=1 SV=2;sp|Q8VE62|PAIP1_MOUSE Polyadenylate-binding protein-interacting protein 1 OS=Mus musculus OX=10090 GN=Paip1 PE=1 SV=1;tr|D3Z3J6|D3Z3J6_MO	14.6833	14.571	14.5055	15.4815	15.1678	15.5219	26309.6	24339.3	23259	45750.5	36809.7	47049.8	0.570233	-0.810378	0.00512808	2.29004
Vacuolar-sorting protein SNF8	Snf8	sp|Q9CZ28|SNF8_MOUSE Vacuolar-sorting protein SNF8 OS=Mus musculus OX=10090 GN=Snf8 PE=1 SV=1;tr|A2A6M1|A2A6M1_MOUSE Vacuolar-sorting protein SNF8 OS=Mus musculus OX=10090 GN=Snf8 PE=1 SV=1	14.4166	14.2471	14.4173	15.1531	15.1293	15.4792	21869	19444.8	21879.6	36436.6	35840.4	45677.6	0.535744	-0.900385	0.00513847	2.28917
Syntaxin-12	Stx12	sp|Q9ER00|STX12_MOUSE Syntaxin-12 OS=Mus musculus OX=10090 GN=Stx12 PE=1 SV=1	11.4346	11.7757	10.7453	12.8373	12.5135	12.9266	2767.95	3506.22	1716.55	7318.34	5847.08	7785.64	0.381399	-1.39063	0.00523229	2.28131
Charged multivesicular body protein 5	Chmp5	sp|Q9D7S9|CHMP5_MOUSE Charged multivesicular body protein 5 OS=Mus musculus OX=10090 GN=Chmp5 PE=1 SV=1	14.137	13.6844	14.4203	14.9386	15.0455	15.1567	18016.1	13164.8	21925.2	31402.7	33817.9	36527.6	0.521936	-0.938054	0.00524034	2.28064
Syndecan-4	Sdc4	sp|O35988|SDC4_MOUSE Syndecan-4 OS=Mus musculus OX=10090 GN=Sdc4 PE=1 SV=1	11.6163	10.9468	11.7338	12.9288	13.2949	13.5494	3139.46	1973.85	3405.85	7797.52	10049.9	11988.8	0.28553	-1.80828	0.00527556	2.27773
Endophilin-A2	Sh3gl1	sp|Q62419|SH3G1_MOUSE Endophilin-A2 OS=Mus musculus OX=10090 GN=Sh3gl1 PE=1 SV=1;tr|A0A3B2W7K0|A0A3B2W7K0_MOUSE Endophilin-A2 OS=Mus musculus OX=10090 GN=Sh3gl1 PE=1 SV=1	18.2207	18.4315	18.4047	19.7329	19.7815	20.2546	305476	353537	347030	871354	901208	1.25096e+06	0.332739	-1.58754	0.00541008	2.2668
Eukaryotic initiation factor 4A-III;Eukaryotic initiation factor 4A-III, N-terminally processed	Eif4a3;Gm8994	sp|Q91VC3|IF4A3_MOUSE Eukaryotic initiation factor 4A-III OS=Mus musculus OX=10090 GN=Eif4a3 PE=1 SV=3;tr|A0A0N4SVP8|A0A0N4SVP8_MOUSE Eukaryotic translation initiation factor 4A3-like 2 OS=Mus musculus OX=10090 GN=Eif4a3l2 PE=3 SV=1;tr|E9PV04|E9PV04_MOUSE	13.0886	12.7739	12.9996	12.1178	12.0726	12.3803	8710.86	7003.69	8189.73	4444.48	4307.4	5331.4	1.69735	0.763286	0.00543364	2.26491
Death-associated protein kinase 1	Dapk1	sp|Q80YE7|DAPK1_MOUSE Death-associated protein kinase 1 OS=Mus musculus OX=10090 GN=Dapk1 PE=1 SV=3	13.0018	12.926	13.0629	13.7546	13.7989	14.1291	8202.23	7782.4	8557.06	13821.2	14252.2	17917.7	0.533617	-0.906123	0.00561116	2.25095
EH domain-containing protein 4	Ehd4	sp|Q9EQP2|EHD4_MOUSE EH domain-containing protein 4 OS=Mus musculus OX=10090 GN=Ehd4 PE=1 SV=1	14.5549	14.2601	14.8983	15.4206	15.6337	15.7686	24069.2	19620.9	30537.6	43859.4	50840.8	55824.1	0.493127	-1.01997	0.00564795	2.24811
Poliovirus receptor	Pvr	tr|Q8K094|Q8K094_MOUSE Poliovirus receptor OS=Mus musculus OX=10090 GN=Pvr PE=1 SV=1	9.34173	9.61419	8.78844	11.0651	10.7314	10.5502	648.845	783.718	442.165	2142.53	1700.1	1499.43	0.350937	-1.51071	0.00572422	2.24228
Sodium- and chloride-dependent GABA transporter 1	Slc6a1	sp|P31648|SC6A1_MOUSE Sodium- and chloride-dependent GABA transporter 1 OS=Mus musculus OX=10090 GN=Slc6a1 PE=1 SV=2;tr|A0A0N4SVF5|A0A0N4SVF5_MOUSE Sodium- and chloride-dependent GABA transporter 1 OS=Mus musculus OX=10090 GN=Slc6a1 PE=1 SV=1	12.1624	12.1861	13.1625	13.8494	13.8857	13.7519	4584.03	4659.95	9168.69	14759.9	15136	13795.4	0.421426	-1.24665	0.00578464	2.23772
DNA dC->dU-editing enzyme APOBEC-3	Apobec3	sp|Q99J72|ABEC3_MOUSE DNA dC->dU-editing enzyme APOBEC-3 OS=Mus musculus OX=10090 GN=Apobec3 PE=1 SV=3;tr|Q3U5C5|Q3U5C5_MOUSE Apolipoprotein B mRNA editing enzyme, catalytic polypeptide 3 OS=Mus musculus OX=10090 GN=Apobec3 PE=1 SV=1;tr|E9QMH1|E9QMH1_MOUSE	11.6323	11.9532	11.9408	13.1484	13.2507	13.6871	3174.47	3965.26	3931.33	9079.52	9746.71	13189.5	0.345801	-1.53199	0.00579502	2.23695
Multivesicular body subunit 12A	Mvb12a	sp|Q78HU3|MB12A_MOUSE Multivesicular body subunit 12A OS=Mus musculus OX=10090 GN=Mvb12a PE=1 SV=1	15.221	16.1281	15.5691	17.1512	16.9111	17.4098	38192.5	71621.2	48614.5	145555	123239	174129	0.357688	-1.48323	0.00589357	2.22962
Plexin-B1	Plxnb1	sp|Q8CJH3|PLXB1_MOUSE Plexin-B1 OS=Mus musculus OX=10090 GN=Plxnb1 PE=1 SV=2	12.8717	13.1371	13.537	14.1541	14.0824	13.9625	7494.93	9008.68	11886.2	18230.9	17347	15963.6	0.550814	-0.860363	0.0059527	2.22529
Synaptobrevin homolog YKT6	Ykt6	sp|Q9CQW1|YKT6_MOUSE Synaptobrevin homolog YKT6 OS=Mus musculus OX=10090 GN=Ykt6 PE=1 SV=1	9.79114	10.6597	10.4334	11.2651	11.5726	11.4271	885.986	1617.67	1382.82	2461.12	3045.79	2753.59	0.470489	-1.08777	0.00599071	2.22252
CD109 antigen	Cd109	sp|Q8R422|CD109_MOUSE CD109 antigen OS=Mus musculus OX=10090 GN=Cd109 PE=1 SV=1	17.7971	18.5289	18.5252	19.4492	19.6737	19.9486	227751	378229	377260	715801	836323	1.01188e+06	0.383479	-1.38278	0.00609252	2.2152
Heterogeneous nuclear ribonucleoprotein U-like protein 1	Hnrnpul1	sp|Q8VDM6|HNRL1_MOUSE Heterogeneous nuclear ribonucleoprotein U-like protein 1 OS=Mus musculus OX=10090 GN=Hnrnpul1 PE=1 SV=1	11.5291	11.1893	11.1567	10.3485	10.0171	10.4612	2955.32	2335.15	2282.98	1303.79	1036.21	1409.73	2.01973	1.01416	0.00630571	2.20027
Retinal rod rhodopsin-sensitive cGMP 3,5-cyclic phosphodiesterase subunit delta	Pde6d	sp|O55057|PDE6D_MOUSE Retinal rod rhodopsin-sensitive cGMP 3,5-cyclic phosphodiesterase subunit delta OS=Mus musculus OX=10090 GN=Pde6d PE=1 SV=1	9.35204	9.9658	9.66702	10.8928	11.0859	10.6118	653.498	1000.01	812.948	1901.34	2173.64	1564.84	0.437329	-1.19321	0.00641763	2.19263
Dynactin subunit 1	Dctn1	sp|O08788|DCTN1_MOUSE Dynactin subunit 1 OS=Mus musculus OX=10090 GN=Dctn1 PE=1 SV=3;tr|D3YX34|D3YX34_MOUSE Dynactin subunit 1 OS=Mus musculus OX=10090 GN=Dctn1 PE=1 SV=1;tr|E9Q586|E9Q586_MOUSE Dynactin subunit 1 OS=Mus musculus OX=10090 GN=Dctn1 PE=1 SV=1	10.0116	10.3409	10.0898	9.22036	8.61722	9.36861	1032.27	1296.94	1089.76	596.492	392.683	661.047	2.07183	1.0509	0.00664786	2.17732
Heterogeneous nuclear ribonucleoprotein U	Hnrnpu	sp|Q8VEK3|HNRPU_MOUSE Heterogeneous nuclear ribonucleoprotein U OS=Mus musculus OX=10090 GN=Hnrnpu PE=1 SV=1	15.4215	14.7453	14.9845	13.4875	12.4786	12.6698	43886.8	27464.9	32417.8	11485.3	5707.33	6516.13	4.37684	2.12989	0.00677276	2.16923
Zinc finger CCCH domain-containing protein 10	Zc3h10	sp|Q8R205|ZC3HA_MOUSE Zinc finger CCCH domain-containing protein 10 OS=Mus musculus OX=10090 GN=Zc3h10 PE=1 SV=1	14.4804	14.2218	14.7315	15.7891	15.7685	16.2682	22857.8	19106.8	27203.4	56623	55820.2	78925.3	0.361439	-1.46818	0.00679071	2.16808
Transmembrane protein 242	Tmem242	sp|Q8VCR3|TM242_MOUSE Transmembrane protein 242 OS=Mus musculus OX=10090 GN=Tmem242 PE=2 SV=1	11.5345	11.4137	11.141	12.7166	12.3833	12.9595	2966.41	2728.14	2258.27	6730.98	5342.5	7965.23	0.396872	-1.33325	0.00684746	2.16447
Peptidyl-prolyl cis-trans isomerase A;Peptidyl-prolyl cis-trans isomerase A, N-terminally processed	Ppia	sp|P17742|PPIA_MOUSE Peptidyl-prolyl cis-trans isomerase A OS=Mus musculus OX=10090 GN=Ppia PE=1 SV=2;tr|A0A1L1SST0|A0A1L1SST0_MOUSE Peptidyl-prolyl cis-trans isomerase OS=Mus musculus OX=10090 GN=Ppia PE=1 SV=1	18.2697	18.8038	18.9109	19.681	19.6456	20.021	316030	457623	492888	840565	820191	1.06395e+06	0.464836	-1.10521	0.00689266	2.16161
Reticulon-4 receptor-like 1	Rtn4rl1	sp|Q8K0S5|R4RL1_MOUSE Reticulon-4 receptor-like 1 OS=Mus musculus OX=10090 GN=Rtn4rl1 PE=1 SV=1	13.7406	13.1399	14.0049	14.704	15.1158	15.1881	13687.8	9026.18	16439.7	26689.8	35506.6	37331.3	0.393395	-1.34595	0.00690729	2.16069
Polypyrimidine tract-binding protein 1	Ptbp1	sp|P17225|PTBP1_MOUSE Polypyrimidine tract-binding protein 1 OS=Mus musculus OX=10090 GN=Ptbp1 PE=1 SV=2;tr|E9Q279|E9Q279_MOUSE Polypyrimidine tract-binding protein 1 OS=Mus musculus OX=10090 GN=Ptbp1 PE=1 SV=1;tr|E9QMW9|E9QMW9_MOUSE Polypyrimidine tract-b	9.24702	9.22907	9.44689	10.4553	10.0034	10.2426	607.618	600.105	697.907	1403.97	1026.42	1211.52	0.52325	-0.934427	0.00697282	2.15659
GTPase KRas;GTPase KRas, N-terminally processed	Kras;Hras	sp|P32883|RASK_MOUSE GTPase KRas OS=Mus musculus OX=10090 GN=Kras PE=1 SV=1;tr|C0H5X4|C0H5X4_MOUSE GTPase HRas OS=Mus musculus OX=10090 GN=Hras PE=2 SV=1	14.5057	14.8498	14.9843	15.4223	15.6272	15.4257	23262.2	29528.1	32413.3	43911.2	50612.3	44014.8	0.615019	-0.701297	0.00704183	2.15231
Formin-like protein 2	Fmnl2	sp|A2APV2|FMNL2_MOUSE Formin-like protein 2 OS=Mus musculus OX=10090 GN=Fmnl2 PE=1 SV=2;tr|E9PXE6|E9PXE6_MOUSE Formin-like protein 2 OS=Mus musculus OX=10090 GN=Fmnl2 PE=1 SV=2;tr|F8VPR2|F8VPR2_MOUSE Formin-like protein 2 OS=Mus musculus OX=10090 GN=Fmnl2	14.3528	14.4582	14.4875	14.9087	14.9994	15.2227	20923	22508.8	22970.6	30758.6	32754.4	38237.5	0.6526	-0.615729	0.0070895	2.14938
Roundabout homolog 2	Robo2	sp|Q7TPD3|ROBO2_MOUSE Roundabout homolog 2 OS=Mus musculus OX=10090 GN=Robo2 PE=1 SV=2;tr|Q19AB2|Q19AB2_MOUSE ROBO2 isoform b OS=Mus musculus OX=10090 GN=Robo2 PE=1 SV=1;tr|E9Q6A0|E9Q6A0_MOUSE Roundabout homolog 2 OS=Mus musculus OX=10090 GN=Robo2 PE=1 SV=	14.7204	14.9001	15.0893	15.3629	15.4208	15.5238	26994.9	30575.7	34860.4	42139.9	43865.5	47111.8	0.694358	-0.526248	0.00737585	2.13219
Platelet glycoprotein 4	Cd36	sp|Q08857|CD36_MOUSE Platelet glycoprotein 4 OS=Mus musculus OX=10090 GN=Cd36 PE=1 SV=2;tr|A0A0G2JFB7|A0A0G2JFB7_MOUSE Platelet glycoprotein 4 (Fragment) OS=Mus musculus OX=10090 GN=Cd36 PE=1 SV=1	13.5043	13.7497	14.2415	15.5935	16.0454	16.3717	11619.8	13774.4	19369.5	49443.7	67631.1	84795.5	0.221745	-2.17303	0.0074673	2.12684
Gap junction alpha-1 protein	Gja1	sp|P23242|CXA1_MOUSE Gap junction alpha-1 protein OS=Mus musculus OX=10090 GN=Gja1 PE=1 SV=2	14.5073	15.1709	14.5489	16.0585	16.3389	15.8343	23288	36888.9	23969.3	68248	82889.4	58425.1	0.401533	-1.31641	0.00752615	2.12343
116 kDa U5 small nuclear ribonucleoprotein component	Eftud2	sp|O08810|U5S1_MOUSE 116 kDa U5 small nuclear ribonucleoprotein component OS=Mus musculus OX=10090 GN=Eftud2 PE=1 SV=1;tr|G3UZ34|G3UZ34_MOUSE 116 kDa U5 small nuclear ribonucleoprotein component OS=Mus musculus OX=10090 GN=Eftud2 PE=1 SV=1;tr|A2AH85|A2AH85	14.7328	14.278	14.2899	13.4471	13.1592	13.0368	27227.9	19865.8	20030.3	11168.1	9147.74	8403.65	2.33723	1.2248	0.0075262	2.12342
Charged multivesicular body protein 2a	Chmp2a	sp|Q9DB34|CHM2A_MOUSE Charged multivesicular body protein 2a OS=Mus musculus OX=10090 GN=Chmp2a PE=1 SV=1;tr|A0A1B0GT75|A0A1B0GT75_MOUSE Charged multivesicular body protein 2a OS=Mus musculus OX=10090 GN=Chmp2a PE=1 SV=1;tr|A0A1B0GR63|A0A1B0GR63_MOUSE Char	14.7606	14.5632	14.9751	15.6025	16.0767	16.0932	27757.7	24208.1	32207.3	49753.1	69114.5	69909.5	0.445886	-1.16525	0.0075328	2.12304
Peripheral plasma membrane protein CASK	Cask	sp|O70589|CSKP_MOUSE Peripheral plasma membrane protein CASK OS=Mus musculus OX=10090 GN=Cask PE=1 SV=2;tr|A0A067XG53|A0A067XG53_MOUSE Peripheral plasma membrane protein CASK (Fragment) OS=Mus musculus OX=10090 GN=Cask PE=1 SV=1;tr|F6Y9I5|F6Y9I5_MOUSE Peri	12.8176	13.2118	13.143	13.8351	14.2772	14.006	7219.08	9487.42	9045.6	14614.4	19854.8	16452.3	0.505722	-0.983583	0.00759898	2.11924
Metallothionein-3	Mt3	sp|P28184|MT3_MOUSE Metallothionein-3 OS=Mus musculus OX=10090 GN=Mt3 PE=1 SV=1;tr|A0A1D5RLI5|A0A1D5RLI5_MOUSE Metallothionein OS=Mus musculus OX=10090 GN=Mt3 PE=1 SV=1;tr|A0A1D5RLF4|A0A1D5RLF4_MOUSE Metallothionein OS=Mus musculus OX=10090 GN=Mt3 PE=1 SV=	11.5011	12.0759	11.7672	12.4505	12.4974	12.6344	2898.52	4317.26	3485.62	5597.24	5782.19	6358.19	0.603317	-0.729013	0.00760276	2.11903
Prolow-density lipoprotein receptor-related protein 1;Low-density lipoprotein receptor-related protein 1 85 kDa subunit;Low-density lipoprotein receptor-related protein 1 515 kDa subunit;Low-density lipoprotein receptor-related protein 1 intracellular domain	Lrp1	sp|Q91ZX7|LRP1_MOUSE Prolow-density lipoprotein receptor-related protein 1 OS=Mus musculus OX=10090 GN=Lrp1 PE=1 SV=1;tr|A0A0R4J0I9|A0A0R4J0I9_MOUSE Prolow-density lipoprotein receptor-related protein 1 OS=Mus musculus OX=10090 GN=Lrp1 PE=1 SV=1	13.7291	14.1128	13.643	14.4649	14.6775	14.5036	13579.1	17716.4	12792.4	22613.6	26204	23228.4	0.611942	-0.708533	0.00782669	2.10642
Vacuolar protein sorting-associated protein 11 homolog	Vps11	sp|Q91W86|VPS11_MOUSE Vacuolar protein sorting-associated protein 11 homolog OS=Mus musculus OX=10090 GN=Vps11 PE=1 SV=3	12.0106	11.1187	12.5096	13.3002	13.1593	13.4988	4126.21	2223.63	5831.29	10086.9	9148.38	11575.6	0.395351	-1.33879	0.00785887	2.10464
Charged multivesicular body protein 1b-2	Chmp1b2	sp|Q9CQD4|CH1B2_MOUSE Charged multivesicular body protein 1b-2 OS=Mus musculus OX=10090 GN=Chmp1b2 PE=2 SV=2	13.3192	13.2105	13.767	14.2508	14.4909	14.2088	10220.7	9478.87	13940.6	19494.8	23024.8	18935.4	0.547394	-0.869349	0.00790066	2.10234
Pleckstrin homology domain-containing family B member 2	Plekhb2	sp|Q9QZC7|PKHB2_MOUSE Pleckstrin homology domain-containing family B member 2 OS=Mus musculus OX=10090 GN=Plekhb2 PE=1 SV=1;tr|D3Z3L2|D3Z3L2_MOUSE Pleckstrin homology domain-containing family B member 2 (Fragment) OS=Mus musculus OX=10090 GN=Plekhb2 PE=4 S	10.9754	11.0106	10.0469	12.3006	11.9328	11.8894	2013.37	2063.1	1057.84	5044.87	3909.59	3793.73	0.402749	-1.31205	0.00794107	2.10012
Myc box-dependent-interacting protein 1	Bin1	sp|O08539|BIN1_MOUSE Myc box-dependent-interacting protein 1 OS=Mus musculus OX=10090 GN=Bin1 PE=1 SV=1;tr|A0A3Q4EBK4|A0A3Q4EBK4_MOUSE Myc box-dependent-interacting protein 1 OS=Mus musculus OX=10090 GN=Bin1 PE=1 SV=1;tr|Q6P1B9|Q6P1B9_MOUSE Bin1 protein OS	13.6902	13.462	14.1073	14.628	14.9926	15.0878	13217.9	11284.1	17649	25320.2	32600.4	34824.1	0.454484	-1.1377	0.0079735	2.09835
Vascular cell adhesion protein 1	Vcam1	sp|P29533|VCAM1_MOUSE Vascular cell adhesion protein 1 OS=Mus musculus OX=10090 GN=Vcam1 PE=1 SV=1;tr|Q3UPN1|Q3UPN1_MOUSE Vascular cell adhesion protein 1 OS=Mus musculus OX=10090 GN=Vcam1 PE=1 SV=1;tr|A0A0G2JFP9|A0A0G2JFP9_MOUSE Vascular cell adhesion pro	11.2003	11.3069	11.495	12.6951	12.2249	12.3106	2353.02	2533.47	2886.29	6631.41	4786.98	5079.95	0.471125	-1.08582	0.00803107	2.09523
Cyclin-dependent kinase 1	Cdk1	sp|P11440|CDK1_MOUSE Cyclin-dependent kinase 1 OS=Mus musculus OX=10090 GN=Cdk1 PE=1 SV=3;tr|D3Z2T9|D3Z2T9_MOUSE Cyclin-dependent kinase 1 (Fragment) OS=Mus musculus OX=10090 GN=Cdk1 PE=1 SV=1	14.6666	14.5232	14.7701	15.2058	15.5515	15.304	26006.8	23546.1	27941.1	37792.2	48025.1	40454.1	0.613709	-0.704372	0.00804699	2.09437
Retrovirus-related Pol polyprotein;Reverse transcriptase;Endonuclease	Pol	sp|P10400|POL1_MOUSE Retrovirus-related Pol polyprotein (Fragment) OS=Mus musculus OX=10090 GN=Pol PE=2 SV=1	16.2803	16.4496	16.1048	18.0565	18.0663	18.6861	79590	89500	70473.8	272614	274472	421771	0.247264	-2.01587	0.00810403	2.0913
WAS/WASL-interacting protein family member 2	Wipf2	sp|Q6PEV3|WIPF2_MOUSE WAS/WASL-interacting protein family member 2 OS=Mus musculus OX=10090 GN=Wipf2 PE=1 SV=1	14.173	14.4235	14.3511	15.4314	15.4036	15.906	18471.3	21973.8	20898.3	44189	43345.7	61402.1	0.411876	-1.27972	0.00811579	2.09067
Isocitrate dehydrogenase [NADP], mitochondrial	Idh2	sp|P54071|IDHP_MOUSE Isocitrate dehydrogenase [NADP], mitochondrial OS=Mus musculus OX=10090 GN=Idh2 PE=1 SV=3	11.6534	11.5634	11.4989	10.2299	11.0216	10.8218	3221.24	3026.43	2894.1	1200.9	2078.89	1810.03	1.79609	0.844857	0.00813806	2.08948
Formin-binding protein 1	Fnbp1	sp|Q80TY0|FNBP1_MOUSE Formin-binding protein 1 OS=Mus musculus OX=10090 GN=Fnbp1 PE=1 SV=2;tr|F6VVN1|F6VVN1_MOUSE Formin-binding protein 1 (Fragment) OS=Mus musculus OX=10090 GN=Fnbp1 PE=1 SV=1;tr|A2AQ43|A2AQ43_MOUSE Formin-binding protein 1 OS=Mus musculu	12.1945	11.9553	12.1347	13.2917	13.1399	13.7003	4687.17	3971.04	4496.85	10027.7	9026.18	13310.7	0.406465	-1.2988	0.00814854	2.08892
Leucyl-cystinyl aminopeptidase	Lnpep	sp|Q8C129|LCAP_MOUSE Leucyl-cystinyl aminopeptidase OS=Mus musculus OX=10090 GN=Lnpep PE=1 SV=1	12.9739	13.2776	13.1281	13.8685	13.686	14.0595	8045.13	9930.15	8952.66	14956.7	13179.4	17073.8	0.59562	-0.747536	0.00819655	2.08637
Vesicle-associated membrane protein 3;Vesicle-associated membrane protein 2	Vamp3;Vamp2	sp|P63024|VAMP3_MOUSE Vesicle-associated membrane protein 3 OS=Mus musculus OX=10090 GN=Vamp3 PE=1 SV=1;sp|P63044|VAMP2_MOUSE Vesicle-associated membrane protein 2 OS=Mus musculus OX=10090 GN=Vamp2 PE=1 SV=2;tr|B0QZN5|B0QZN5_MOUSE Vesicle-associated membra	13.5918	13.7909	14.3556	14.9302	14.9356	14.7441	12346.4	14173.4	20963.6	31220.4	31337.4	27442	0.527594	-0.922499	0.00828899	2.0815
Endothelin B receptor	Ednrb	sp|P48302|EDNRB_MOUSE Endothelin receptor type B OS=Mus musculus OX=10090 GN=Ednrb PE=2 SV=1	15.3495	15.4539	15.8158	16.2245	16.62	16.4826	41750.3	44883.6	57680.7	76570.4	100721	91570.8	0.536761	-0.897648	0.00834398	2.07863
EH domain-containing protein 1	Ehd1	sp|Q9WVK4|EHD1_MOUSE EH domain-containing protein 1 OS=Mus musculus OX=10090 GN=Ehd1 PE=1 SV=1	15.8817	16.134	15.9165	16.7768	16.9065	17.2472	60376.5	71914.7	61850.6	112285	122847	155570	0.496907	-1.00895	0.00837308	2.07711
Tyrosine-protein kinase Fyn;Non-specific protein-tyrosine kinase	Fyn	sp|P39688|FYN_MOUSE Tyrosine-protein kinase Fyn OS=Mus musculus OX=10090 GN=Fyn PE=1 SV=4;tr|D3YZ57|D3YZ57_MOUSE Tyrosine-protein kinase OS=Mus musculus OX=10090 GN=Fyn PE=1 SV=1	14.0046	13.6655	14.1053	14.6711	14.9838	15.1482	16436.3	12993.5	17624.6	26088	32402.1	36313	0.496337	-1.01061	0.00838279	2.07661
CUGBP Elav-like family member 1	Celf1	sp|P28659|CELF1_MOUSE CUGBP Elav-like family member 1 OS=Mus musculus OX=10090 GN=Celf1 PE=1 SV=2;tr|A0A0R4J0T5|A0A0R4J0T5_MOUSE CUGBP Elav-like family member 1 OS=Mus musculus OX=10090 GN=Celf1 PE=1 SV=1	12.7185	13.0744	12.5058	13.8506	13.4768	13.7794	6739.85	8625.55	5815.95	14772.2	11400.4	14060.9	0.52646	-0.925605	0.0085269	2.06921
Splicing factor 3b, subunit	Sf3b2	tr|Q3UJB0|Q3UJB0_MOUSE Splicing factor 3b, subunit 2 OS=Mus musculus OX=10090 GN=Sf3b2 PE=1 SV=1;tr|A0A494B9S9|A0A494B9S9_MOUSE Splicing factor 3b, subunit 2 (Fragment) OS=Mus musculus OX=10090 GN=Sf3b2 PE=1 SV=1	13.884	13.9417	14.0065	14.3362	14.3073	14.5463	15118.2	15735.1	16458	20683.6	20273.4	23926.1	0.729177	-0.455658	0.00860302	2.06535
Protein flightless-1 homolog	Flii	sp|Q9JJ28|FLII_MOUSE Protein flightless-1 homolog OS=Mus musculus OX=10090 GN=Flii PE=1 SV=1	10.1729	9.94446	9.75776	10.4214	10.5846	10.5651	1154.38	985.328	865.722	1371.37	1535.61	1515	0.679657	-0.557122	0.00865263	2.06285
Ras-related protein Ral-B	Ralb	sp|Q9JIW9|RALB_MOUSE Ras-related protein Ral-B OS=Mus musculus OX=10090 GN=Ralb PE=1 SV=1;tr|F6QC68|F6QC68_MOUSE Ras-related protein Ral-B (Fragment) OS=Mus musculus OX=10090 GN=Ralb PE=1 SV=2	13.9991	14.286	14.4087	15.1398	14.792	15.0154	16373.8	19976.3	21749.6	36102.2	28368.5	33119.7	0.595342	-0.748209	0.00875223	2.05788
Myelin protein zero-like protein 1	Mpzl1	sp|Q3TEW6|MPZL1_MOUSE Myelin protein zero-like protein 1 OS=Mus musculus OX=10090 GN=Mpzl1 PE=1 SV=1;tr|A0A0A6YXX8|A0A0A6YXX8_MOUSE Myelin protein zero-like protein 1 (Fragment) OS=Mus musculus OX=10090 GN=Mpzl1 PE=1 SV=1;tr|A0A0A6YX14|A0A0A6YX14_MOUSE Mye	11.6609	12.2359	11.7969	12.8344	13.0471	12.6709	3238.03	4823.62	3558.12	7303.64	8463.86	6521.1	0.521332	-0.939725	0.00875613	2.05769
Dedicator of cytokinesis protein 1;Dedicator of cytokinesis protein 5	Dock1;Dock5	sp|Q8BUR4|DOCK1_MOUSE Dedicator of cytokinesis protein 1 OS=Mus musculus OX=10090 GN=Dock1 PE=1 SV=3;sp|B2RY04|DOCK5_MOUSE Dedicator of cytokinesis protein 5 OS=Mus musculus OX=10090 GN=Dock5 PE=1 SV=2;tr|A0A1B0GSI1|A0A1B0GSI1_MOUSE Dedicator of cytokinesi	13.4174	12.8481	13.0334	11.8056	11.7687	10.5057	10940.6	7373.33	8383.87	3579.64	3489.25	1453.89	3.13252	1.64732	0.00879566	2.05573
Golgi-associated plant pathogenesis-related protein 1	Glipr2	sp|Q9CYL5|GAPR1_MOUSE Golgi-associated plant pathogenesis-related protein 1 OS=Mus musculus OX=10090 GN=Glipr2 PE=1 SV=3	12.6756	12.1466	12.9034	13.9656	14.2011	14.6239	6542.38	4534.1	7661.44	15998	18834.6	25248.3	0.311878	-1.68095	0.0087962	2.0557
Elongation factor 1-delta	Eef1d	sp|P57776|EF1D_MOUSE Elongation factor 1-delta OS=Mus musculus OX=10090 GN=Eef1d PE=1 SV=3;tr|Q80T06|Q80T06_MOUSE Elongation factor 1-delta OS=Mus musculus OX=10090 GN=Eef1d PE=1 SV=1;tr|A0A0R4J1E2|A0A0R4J1E2_MOUSE Elongation factor 1-delta OS=Mus musculus	13.7485	13.4194	13.2369	12.3391	12.0833	12.5732	13762.9	10955.7	9653.93	5181.31	4339.46	6094.11	2.20127	1.13834	0.00891595	2.04983
Phosphatidylinositol-binding clathrin assembly protein	Picalm	sp|Q7M6Y3|PICAL_MOUSE Phosphatidylinositol-binding clathrin assembly protein OS=Mus musculus OX=10090 GN=Picalm PE=1 SV=1;tr|A0A1L1SUR7|A0A1L1SUR7_MOUSE Phosphatidylinositol-binding clathrin assembly protein (Fragment) OS=Mus musculus OX=10090 GN=Picalm PE	11.6429	11.7	11.7501	12.3368	12.0335	12.2251	3197.88	3326.99	3444.55	5173.05	4192.22	4787.64	0.704407	-0.505519	0.00902175	2.04471
Phospholipid scramblase 3	Plscr3	sp|Q9JIZ9|PLS3_MOUSE Phospholipid scramblase 3 OS=Mus musculus OX=10090 GN=Plscr3 PE=1 SV=1;tr|Q5F284|Q5F284_MOUSE Phospholipid scramblase (Fragment) OS=Mus musculus OX=10090 GN=Plscr3 PE=1 SV=1	12.8414	13.2095	13.7889	14.4117	14.7276	14.9514	7339.16	9472.31	14153.8	21794.9	27130	31682.5	0.384149	-1.38026	0.00907267	2.04226
Calpain-5	Capn5	sp|O08688|CAN5_MOUSE Calpain-5 OS=Mus musculus OX=10090 GN=Capn5 PE=1 SV=1	15.2236	15.8729	15.5391	16.3835	16.3783	16.6859	38261.3	60009.4	47614.1	85491.9	85184.3	105428	0.528368	-0.920384	0.00916274	2.03797
Bifunctional polynucleotide phosphatase/kinase;Polynucleotide 3-phosphatase;Polynucleotide 5-hydroxyl-kinase	Pnkp	sp|Q9JLV6|PNKP_MOUSE Bifunctional polynucleotide phosphatase/kinase OS=Mus musculus OX=10090 GN=Pnkp PE=1 SV=2;tr|E9Q9A5|E9Q9A5_MOUSE Bifunctional polynucleotide phosphatase/kinase OS=Mus musculus OX=10090 GN=Pnkp PE=1 SV=1;tr|G5E8N7|G5E8N7_MOUSE Bifunctio	11.49	11.1294	11.3148	11.8343	11.9296	11.734	2876.3	2240.18	2547.38	3651.57	3900.92	3406.32	0.699334	-0.515947	0.0091638	2.03792
Creatine kinase B-type	Ckb	sp|Q04447|KCRB_MOUSE Creatine kinase B-type OS=Mus musculus OX=10090 GN=Ckb PE=1 SV=1	19.4442	19.5553	19.6073	19.0809	18.8774	18.4469	713325	770428	798703	554528	481575	357331	1.63801	0.711943	0.00918103	2.03711
Tumor necrosis factor receptor superfamily member 12A	Tnfrsf12a	sp|Q9CR75|TNR12_MOUSE Tumor necrosis factor receptor superfamily member 12A OS=Mus musculus OX=10090 GN=Tnfrsf12a PE=2 SV=1;tr|E9PZT5|E9PZT5_MOUSE Tumor necrosis factor receptor superfamily member 12A OS=Mus musculus OX=10090 GN=Tnfrsf12a PE=1 SV=1	9.43282	9.05787	10.2771	11.2795	11.1978	10.8274	691.133	532.955	1240.84	2485.81	2348.95	1817.07	0.370564	-1.43221	0.00920611	2.03592
SLIT-ROBO Rho GTPase-activating protein 2	Srgap2	sp|Q91Z67|SRGP2_MOUSE SLIT-ROBO Rho GTPase-activating protein 2 OS=Mus musculus OX=10090 GN=Srgap2 PE=1 SV=2;tr|A0A087WNM1|A0A087WNM1_MOUSE SLIT-ROBO Rho GTPase-activating protein 2 OS=Mus musculus OX=10090 GN=Srgap2 PE=1 SV=1;tr|A0A087WSQ1|A0A087WSQ1_MOUS	14.1646	14.0289	14.5108	14.7777	14.8842	14.9355	18364.1	16715.5	23344.6	28088.7	30240.6	31335.3	0.651586	-0.617972	0.00921223	2.03564
Interleukin enhancer-binding factor 3	Ilf3	sp|Q9Z1X4|ILF3_MOUSE Interleukin enhancer-binding factor 3 OS=Mus musculus OX=10090 GN=Ilf3 PE=1 SV=2;tr|Q45VK5|Q45VK5_MOUSE Interleukin enhancer-binding factor 3 OS=Mus musculus OX=10090 GN=Ilf3 PE=1 SV=1;tr|A0A1L1STE4|A0A1L1STE4_MOUSE Interleukin enhance	15.6975	15.7742	15.9183	16.7273	16.614	17.1062	53139.6	56041.2	61927.8	108497	100303	141085	0.489043	-1.03197	0.0094143	2.02621
Unconventional myosin-Ic	Myo1c	sp|Q9WTI7|MYO1C_MOUSE Unconventional myosin-Ic OS=Mus musculus OX=10090 GN=Myo1c PE=1 SV=2	11.7385	11.4896	11.9153	13.0011	13.3085	12.6936	3416.97	2875.51	3862.45	8198.25	10145.1	6624.52	0.406719	-1.2979	0.00952237	2.02125
Peptidyl-prolyl cis-trans isomerase NIMA-interacting 1	Pin1;Pin1rt1	sp|Q9QUR7|PIN1_MOUSE Peptidyl-prolyl cis-trans isomerase NIMA-interacting 1 OS=Mus musculus OX=10090 GN=Pin1 PE=1 SV=1;tr|Q3ULQ2|Q3ULQ2_MOUSE Peptidyl-prolyl cis-trans isomerase OS=Mus musculus OX=10090 GN=Pin1rt1 PE=1 SV=1	14.2898	14.7775	14.4234	15.7064	15.6143	16.1632	20029	28084.8	21972.3	53468.4	50161.7	73385.1	0.395932	-1.33667	0.00958818	2.01826
CD44 antigen	Cd44	sp|P15379|CD44_MOUSE CD44 antigen OS=Mus musculus OX=10090 GN=Cd44 PE=1 SV=3;tr|Q3U8S1|Q3U8S1_MOUSE CD44 antigen OS=Mus musculus OX=10090 GN=Cd44 PE=1 SV=1;tr|A2APM5|A2APM5_MOUSE CD44 antigen OS=Mus musculus OX=10090 GN=Cd44 PE=1 SV=1;tr|A2APM3|A2APM3_MOUS	10.5447	10.904	10.5361	11.5418	12.1468	11.9508	1493.73	1916.16	1484.85	2981.45	4534.73	3958.67	0.426562	-1.22917	0.00991039	2.00391
Protein shisa-4	Shisa4	sp|Q8CA71|SHSA4_MOUSE Protein shisa-4 OS=Mus musculus OX=10090 GN=Shisa4 PE=1 SV=1	14.4541	14.9639	14.5468	16.1035	16.2324	16.766	22444.9	31958.2	23934.4	70410.4	76990.9	111447	0.302639	-1.72433	0.00998504	2.00065
Neurexin-2	Nrxn2	tr|E9Q5N7|E9Q5N7_MOUSE Neurexin-2 OS=Mus musculus OX=10090 GN=Nrxn2 PE=1 SV=2;tr|A0A494B8Y4|A0A494B8Y4_MOUSE Neurexin-2 OS=Mus musculus OX=10090 GN=Nrxn2 PE=1 SV=1;tr|E9PUM9|E9PUM9_MOUSE Neurexin-2 OS=Mus musculus OX=10090 GN=Nrxn2 PE=1 SV=1;sp|E9Q7X7|NRX2	13.3671	13.7767	13.8712	14.2465	14.4228	14.5462	10565.7	14034.6	14984.7	19436.8	21963.2	23924.5	0.605975	-0.72267	0.0100899	1.99611
Ras-related protein Rab-1A	Rab1A;Rab1	sp|P62821|RAB1A_MOUSE Ras-related protein Rab-1A OS=Mus musculus OX=10090 GN=Rab1A PE=1 SV=3;tr|Q5SW87|Q5SW87_MOUSE RAB1A, member RAS oncogene family OS=Mus musculus OX=10090 GN=Rab1a PE=1 SV=1;tr|Q5SW88|Q5SW88_MOUSE RAB1A, member RAS oncogene family OS=Mu	12.8863	13.0029	13.1719	13.5417	13.6426	13.8891	7571.17	8208.48	9228.63	11925	12788.9	15171.8	0.627	-0.673462	0.0102309	1.99009
CKLF-like MARVEL transmembrane domain-containing protein 6	Cmtm6	sp|Q9CZ69|CKLF6_MOUSE CKLF-like MARVEL transmembrane domain-containing protein 6 OS=Mus musculus OX=10090 GN=Cmtm6 PE=1 SV=1	10.9465	11.5337	11.535	12.693	12.3991	12.2058	1973.44	2964.76	2967.43	6621.76	5401.33	4724.02	0.47206	-1.08296	0.0103425	1.98538
Membrane protein MLC1	Mlc1	sp|Q8VHK5|MLC1_MOUSE Membrane protein MLC1 OS=Mus musculus OX=10090 GN=Mlc1 PE=1 SV=1;tr|E9QP87|E9QP87_MOUSE Membrane protein MLC1 OS=Mus musculus OX=10090 GN=Mlc1 PE=1 SV=1	11.7532	11.3174	10.8664	12.4543	13.1122	12.965	3451.96	2551.98	1866.86	5612	8854.53	7995.65	0.350402	-1.51292	0.0105553	1.97653
Integrin beta-1	Itgb1	sp|P09055|ITB1_MOUSE Integrin beta-1 OS=Mus musculus OX=10090 GN=Itgb1 PE=1 SV=1	15.8543	16.1612	16.3168	16.7327	17.1271	17.1539	59240.7	73283.5	81629.3	108904	143143	145827	0.538244	-0.893669	0.0106956	1.9708
WD repeat-containing protein 1	Wdr1	sp|O88342|WDR1_MOUSE WD repeat-containing protein 1 OS=Mus musculus OX=10090 GN=Wdr1 PE=1 SV=3	14.4027	14.7295	14.3104	15.2925	15.0076	15.3309	21659.3	27165.7	20317	40133	32941.1	41215.5	0.604973	-0.725058	0.010737	1.96912
Inactive tyrosine-protein kinase 7	Ptk7	sp|Q8BKG3|PTK7_MOUSE Inactive tyrosine-protein kinase 7 OS=Mus musculus OX=10090 GN=Ptk7 PE=1 SV=1	13.7565	13.4604	14.0721	14.4332	14.7002	14.503	13839.5	11271.6	17223.6	22122.1	26619.6	23218.7	0.588305	-0.765364	0.0107762	1.96753
Lysosome membrane protein 2	Scarb2	sp|O35114|SCRB2_MOUSE Lysosome membrane protein 2 OS=Mus musculus OX=10090 GN=Scarb2 PE=1 SV=3	13.3602	13.8041	13.6815	14.3952	14.7795	14.3945	10515.3	14303.7	13138.4	21547	28123.7	21536.6	0.533054	-0.907645	0.01083	1.96537
CD59A glycoprotein	Cd59a	sp|O55186|CD59A_MOUSE CD59A glycoprotein OS=Mus musculus OX=10090 GN=Cd59a PE=2 SV=1	10.831	11.1419	11.0281	11.9459	11.5786	12.0469	1821.61	2259.68	2088.28	3945.25	3058.48	4231.34	0.549135	-0.864768	0.0108368	1.9651
Protein kinase C and casein kinase II substrate protein 3	Pacsin3	sp|Q99JB8|PACN3_MOUSE Protein kinase C and casein kinase II substrate protein 3 OS=Mus musculus OX=10090 GN=Pacsin3 PE=1 SV=1	14.7957	15.1742	15.4095	16.151	15.8256	16.2575	28441.3	36973.4	43523.3	72767.2	58073.8	78342.1	0.520778	-0.941259	0.0109815	1.95934
Septin-5	SEPT5	sp|Q9Z2Q6|SEPT5_MOUSE Septin-5 OS=Mus musculus OX=10090 GN=Septin5 PE=1 SV=2;tr|A0A338P6R8|A0A338P6R8_MOUSE Predicted gene, 49601 OS=Mus musculus OX=10090 GN=Gm49601 PE=3 SV=1;tr|A0A338P769|A0A338P769_MOUSE Septin-5 OS=Mus musculus OX=10090 GN=Septin5 PE=1	11.1981	11.1477	10.8629	10.0849	10.5498	9.9559	2349.44	2268.78	1862.34	1086.07	1499.02	993.172	1.81109	0.85686	0.0110941	1.95491
Ras-related protein Rab-8A	Rab8a	sp|P55258|RAB8A_MOUSE Ras-related protein Rab-8A OS=Mus musculus OX=10090 GN=Rab8a PE=1 SV=2	11.876	11.2107	11.3916	9.85825	9.96403	10.223	3758.65	2370.05	2686.66	928.173	998.785	1195.17	2.82351	1.49749	0.0113582	1.94469
Centrosomal protein of 55 kDa	Cep55	sp|Q8BT07|CEP55_MOUSE Centrosomal protein of 55 kDa OS=Mus musculus OX=10090 GN=Cep55 PE=1 SV=2	14.4544	14.557	14.461	15.3877	15.1882	15.7165	22449.6	24104.3	22552.5	42870.6	37333.9	53844.1	0.515532	-0.955866	0.0113766	1.94399
Sorting nexin;Sorting nexin-18	Snx18	tr|Q8C788|Q8C788_MOUSE Sorting nexin OS=Mus musculus OX=10090 GN=Snx18 PE=1 SV=1;sp|Q91ZR2|SNX18_MOUSE Sorting nexin-18 OS=Mus musculus OX=10090 GN=Snx18 PE=1 SV=1	14.5842	14.7094	14.7858	15.3264	15.8328	15.8421	24563	26789.9	28246.8	41087.2	58364.4	58741.8	0.50318	-0.990854	0.0114681	1.94051
Thioredoxin	Txn	sp|P10639|THIO_MOUSE Thioredoxin OS=Mus musculus OX=10090 GN=Txn PE=1 SV=3	16.6558	17.1213	16.8949	17.9782	17.5161	17.8817	103251	142569	121863	258213	187444	241506	0.535074	-0.902189	0.0116663	1.93307
Disks large homolog 1	Dlg1	sp|Q811D0|DLG1_MOUSE Disks large homolog 1 OS=Mus musculus OX=10090 GN=Dlg1 PE=1 SV=1;tr|D3Z3B8|D3Z3B8_MOUSE Disks large homolog 1 OS=Mus musculus OX=10090 GN=Dlg1 PE=1 SV=1;tr|F6UDT8|F6UDT8_MOUSE Disks large homolog 1 (Fragment) OS=Mus musculus OX=10090 G	12.101	11.9852	11.961	13.1348	13.2853	12.6966	4393.03	4054.2	3986.76	8994.33	9983.29	6638.31	0.4854	-1.04275	0.0117486	1.93002
Myosin-14	Myh14	sp|Q6URW6|MYH14_MOUSE Myosin-14 OS=Mus musculus OX=10090 GN=Myh14 PE=1 SV=1;tr|A0A140LI60|A0A140LI60_MOUSE Myosin-14 (Fragment) OS=Mus musculus OX=10090 GN=Myh14 PE=1 SV=1;tr|K3W4R2|K3W4R2_MOUSE Myosin-14 OS=Mus musculus OX=10090 GN=Myh14 PE=1 SV=1	14.057	13.7569	13.1874	11.784	11.3798	11.9858	17044.3	13843.3	9328.31	3526.45	2664.78	4055.88	3.92461	1.97255	0.0117654	1.92939
Epimerase family protein SDR39U1	Sdr39u1	sp|Q5M8N4|D39U1_MOUSE Epimerase family protein SDR39U1 OS=Mus musculus OX=10090 GN=Sdr39u1 PE=1 SV=2	11.3332	11.7276	11.7563	13.4513	13.2481	14.0303	2580.08	3391.25	3459.39	11200.7	9729.16	16731.7	0.250407	-1.99766	0.0119099	1.92409
Solute carrier family 2, facilitated glucose transporter member 1	Slc2a1	sp|P17809|GTR1_MOUSE Solute carrier family 2, facilitated glucose transporter member 1 OS=Mus musculus OX=10090 GN=Slc2a1 PE=1 SV=4	10.3046	10.8905	9.40791	11.5629	11.6288	11.3752	1264.72	1898.31	679.302	3025.38	3166.78	2656.3	0.434238	-1.20344	0.0121423	1.9157
Charged multivesicular body protein 4b	Chmp4b	sp|Q9D8B3|CHM4B_MOUSE Charged multivesicular body protein 4b OS=Mus musculus OX=10090 GN=Chmp4b PE=1 SV=2	15.8392	15.792	16.319	16.8838	17.5108	17.4349	58623.8	56736.9	81753.9	120929	186757	177185	0.40653	-1.29857	0.0121623	1.91498
Heterogeneous nuclear ribonucleoproteins A2/B1	Hnrnpa2b1	sp|O88569|ROA2_MOUSE Heterogeneous nuclear ribonucleoproteins A2/B1 OS=Mus musculus OX=10090 GN=Hnrnpa2b1 PE=1 SV=2;tr|A0A0N4SUM2|A0A0N4SUM2_MOUSE Heterogeneous nuclear ribonucleoproteins A2/B1 (Fragment) OS=Mus musculus OX=10090 GN=Hnrnpa2b1 PE=1 SV=1	13.4822	13.8039	13.6154	13.2018	12.9036	12.806	11443.2	14301.7	12550	9421.88	7662.5	7161.27	1.57945	0.659425	0.0122166	1.91305
Sorting nexin-33	Snx33	sp|Q4VAA7|SNX33_MOUSE Sorting nexin-33 OS=Mus musculus OX=10090 GN=Snx33 PE=1 SV=1	14.9842	15.2173	15.3231	16.5789	16.6322	17.2433	32411.1	38094.6	40993.3	97891.8	101576	155150	0.314421	-1.66923	0.0122545	1.9117
28 kDa heat- and acid-stable phosphoprotein	Pdap1	sp|Q3UHX2|HAP28_MOUSE 28 kDa heat- and acid-stable phosphoprotein OS=Mus musculus OX=10090 GN=Pdap1 PE=1 SV=1	13.1613	13.0692	13.6899	14.1888	14.0502	13.9948	9161.07	8594.51	13215.1	18674.7	16964.1	16325.1	0.596004	-0.746607	0.012327	1.90914
Synaptic vesicle membrane protein VAT-1 homolog	Vat1	sp|Q62465|VAT1_MOUSE Synaptic vesicle membrane protein VAT-1 homolog OS=Mus musculus OX=10090 GN=Vat1 PE=1 SV=3	12.5456	12.0785	12.6083	11.6293	11.1979	11.3694	5978.63	4325.05	6244.2	3167.88	2349.11	2645.64	2.02727	1.01954	0.012402	1.90651
ATP-dependent 6-phosphofructokinase, muscle type	Pfkm	sp|P47857|PFKAM_MOUSE ATP-dependent 6-phosphofructokinase, muscle type OS=Mus musculus OX=10090 GN=Pfkm PE=1 SV=3	13.0498	12.9697	12.7554	12.4674	12.5016	12.244	8479.71	8021.74	6914.46	5663.19	5799.05	4850.78	1.43541	0.521466	0.0126709	1.89719
Serine/threonine-protein phosphatase with EF-hands 2	Ppef2	sp|O35385|PPE2_MOUSE Serine/threonine-protein phosphatase with EF-hands 2 OS=Mus musculus OX=10090 GN=Ppef2 PE=2 SV=1	14.4742	15.1494	14.5645	16.1991	16.3696	16.9209	22759.8	36343.3	24229.9	75234.1	84672.2	124079	0.293441	-1.76886	0.0126766	1.897
60 kDa SS-A/Ro ribonucleoprotein	Trove2	sp|O08848|RO60_MOUSE 60 kDa SS-A/Ro ribonucleoprotein OS=Mus musculus OX=10090 GN=RO60 PE=1 SV=1	13.4005	13.1865	13.9304	14.6063	14.441	14.9433	10813.2	9322.49	15612.3	24942.2	22242	31505.1	0.454293	-1.13831	0.0128111	1.89241
Poly(rC)-binding protein 3	Pcbp3	sp|P57722|PCBP3_MOUSE Poly(rC)-binding protein 3 OS=Mus musculus OX=10090 GN=Pcbp3 PE=1 SV=3;tr|E9Q7D8|E9Q7D8_MOUSE Poly(rC)-binding protein 3 OS=Mus musculus OX=10090 GN=Pcbp3 PE=1 SV=1	10.7328	11.2394	12.153	12.7632	13.3722	13.4406	1701.75	2417.67	4554.26	6951.94	10603.1	11117.9	0.302503	-1.72498	0.0130968	1.88283
Acylphosphatase-1;Acylphosphatase	Acyp1	sp|P56376|ACYP1_MOUSE Acylphosphatase-1 OS=Mus musculus OX=10090 GN=Acyp1 PE=1 SV=2;tr|E9QJT5|E9QJT5_MOUSE Acylphosphatase OS=Mus musculus OX=10090 GN=Acyp1 PE=1 SV=1	9.57977	10.2668	10.6177	11.2321	11.0244	11.3254	765.241	1232.01	1571.25	2405.46	2082.93	2566.17	0.505843	-0.983237	0.0131642	1.88061
40S ribosomal protein S16	Rps16	sp|P14131|RS16_MOUSE 40S ribosomal protein S16 OS=Mus musculus OX=10090 GN=Rps16 PE=1 SV=4	17.8164	17.752	16.9563	15.7966	15.4361	15.7364	230819	220742	127161	56918.1	44333.2	54591.9	3.71349	1.89277	0.0132392	1.87814
Acidic leucine-rich nuclear phosphoprotein 32 family member B	Anp32b	sp|Q9EST5|AN32B_MOUSE Acidic leucine-rich nuclear phosphoprotein 32 family member B OS=Mus musculus OX=10090 GN=Anp32b PE=1 SV=1	12.6044	12.2215	12.2587	11.7338	11.7279	11.5674	6227.34	4775.71	4900.46	3405.85	3391.95	3034.83	1.61742	0.693695	0.0135309	1.86867
Neural cell adhesion molecule 1	Ncam1	tr|A0A0A6YY47|A0A0A6YY47_MOUSE Neural cell adhesion molecule 1 OS=Mus musculus OX=10090 GN=Ncam1 PE=1 SV=1;sp|P13595|NCAM1_MOUSE Neural cell adhesion molecule 1 OS=Mus musculus OX=10090 GN=Ncam1 PE=1 SV=3;tr|E9QB01|E9QB01_MOUSE Neural cell adhesion molecul	16.4774	16.6781	16.852	17.1444	17.4936	17.5549	91241.3	104860	118293	144870	184543	192554	0.602325	-0.731387	0.014289	1.845
UMP-CMP kinase	Cmpk1	sp|Q9DBP5|KCY_MOUSE UMP-CMP kinase OS=Mus musculus OX=10090 GN=Cmpk1 PE=1 SV=1;tr|A0A0R4J093|A0A0R4J093_MOUSE UMP-CMP kinase OS=Mus musculus OX=10090 GN=Cmpk1 PE=1 SV=1	11.3226	10.726	10.9342	12.0201	11.7855	11.6461	2561.19	1693.74	1956.69	4153.47	3530.12	3204.98	0.570473	-0.80977	0.0146474	1.83424
Eukaryotic translation initiation factor 4H	Eif4h	sp|Q9WUK2|IF4H_MOUSE Eukaryotic translation initiation factor 4H OS=Mus musculus OX=10090 GN=Eif4h PE=1 SV=3	12.5318	12.9909	12.9845	13.6041	13.3182	13.6152	5921.72	8140.49	8104.46	12452.1	10213.6	12548.3	0.629486	-0.667754	0.0147377	1.83157
Clathrin light chain A	Clta	tr|B1AWE0|B1AWE0_MOUSE Clathrin light chain OS=Mus musculus OX=10090 GN=Clta PE=1 SV=1;tr|Q6PFA2|Q6PFA2_MOUSE Clathrin light chain OS=Mus musculus OX=10090 GN=Clta PE=1 SV=1;sp|O08585|CLCA_MOUSE Clathrin light chain A OS=Mus musculus OX=10090 GN=Clta PE=1	14.38	13.9328	13.9127	14.6485	14.594	14.6904	21321.2	15638.3	15422	25682.5	24730.4	26439.4	0.681586	-0.553032	0.0149566	1.82517
Heterogeneous nuclear ribonucleoprotein F;Heterogeneous nuclear ribonucleoprotein F, N-terminally processed	Hnrnpf	sp|Q9Z2X1|HNRPF_MOUSE Heterogeneous nuclear ribonucleoprotein F OS=Mus musculus OX=10090 GN=Hnrnpf PE=1 SV=3;tr|J3QMT0|J3QMT0_MOUSE Heterogeneous nuclear ribonucleoprotein F (Fragment) OS=Mus musculus OX=10090 GN=Hnrnpf PE=1 SV=8;tr|J3QM80|J3QM80_MOUSE Het	12.607	12.3664	12.8546	11.9651	11.7784	11.8432	6238.57	5280.28	7406.62	3998.1	3512.79	3674.16	1.69203	0.758758	0.0150003	1.8239
Neural cell adhesion molecule 1	Ncam1	tr|A0A0A6YY91|A0A0A6YY91_MOUSE Neural cell adhesion molecule 1 (Fragment) OS=Mus musculus OX=10090 GN=Ncam1 PE=1 SV=1	12.1616	12.2433	12.081	13.1941	13.4598	13.9259	4581.49	4848.42	4332.55	9371.73	11266.9	15563.7	0.380154	-1.39534	0.015222	1.81753
Transforming protein RhoA;Rho-related GTP-binding protein RhoC	Rhoa;Rhoc;4930544G11Rik	sp|Q9QUI0|RHOA_MOUSE Transforming protein RhoA OS=Mus musculus OX=10090 GN=Rhoa PE=1 SV=1;sp|Q62159|RHOC_MOUSE Rho-related GTP-binding protein RhoC OS=Mus musculus OX=10090 GN=Rhoc PE=1 SV=2;tr|H3BL56|H3BL56_MOUSE Rho-related GTP-binding protein RhoC OS=Mu	16.6233	17.0379	16.5836	17.2468	17.3918	17.5127	100951	134561	98211.2	155526	171970	187003	0.648637	-0.624517	0.0152221	1.81753
Heat shock 70 kDa protein 1A;Heat shock 70 kDa protein 1B	Hspa1a;Hspa1b	sp|Q61696|HS71A_MOUSE Heat shock 70 kDa protein 1A OS=Mus musculus OX=10090 GN=Hspa1a PE=1 SV=2;sp|P17879|HS71B_MOUSE Heat shock 70 kDa protein 1B OS=Mus musculus OX=10090 GN=Hspa1b PE=1 SV=3	12.3902	12.2986	12.4979	12.8803	12.6597	12.738	5368.12	5037.88	5784.19	7539.74	6470.67	6831.56	0.776806	-0.364373	0.0152345	1.81717
Neuronal membrane glycoprotein M6-a	Gpm6a	sp|P35802|GPM6A_MOUSE Neuronal membrane glycoprotein M6-a OS=Mus musculus OX=10090 GN=Gpm6a PE=1 SV=1	17.1736	17.6327	17.8146	18.2362	18.3635	18.1206	147832	203222	230531	308776	337260	285000	0.624665	-0.678844	0.015252	1.81667
Chondroitin sulfate proteoglycan 5	Cspg5	sp|Q71M36|CSPG5_MOUSE Chondroitin sulfate proteoglycan 5 OS=Mus musculus OX=10090 GN=Cspg5 PE=1 SV=2	14.9552	15.1372	15.7012	16.0746	16.4346	16.1391	31766.1	36037.2	53276.1	69013.9	88574.3	72169.4	0.526987	-0.92416	0.0154693	1.81053
Ras-related protein Rab-35	Rab35	sp|Q6PHN9|RAB35_MOUSE Ras-related protein Rab-35 OS=Mus musculus OX=10090 GN=Rab35 PE=1 SV=1	12.1047	11.7457	12.4983	12.8428	13.133	12.8908	4404.31	3434.06	5785.8	7346.29	8983.11	7594.82	0.569472	-0.812304	0.0157018	1.80405
Acid sphingomyelinase-like phosphodiesterase 3b	Smpdl3b	sp|P58242|ASM3B_MOUSE Acid sphingomyelinase-like phosphodiesterase 3b OS=Mus musculus OX=10090 GN=Smpdl3b PE=1 SV=1	14.4833	14.6858	14.7094	15.0982	15.39	15.5817	22903.8	26355.2	26789.9	35076.1	42939	49041	0.598546	-0.740466	0.0158063	1.80117
Chromobox protein homolog 3	Cbx3	sp|P23198|CBX3_MOUSE Chromobox protein homolog 3 OS=Mus musculus OX=10090 GN=Cbx3 PE=1 SV=2;tr|D3Z1A9|D3Z1A9_MOUSE Chromobox protein homolog 3 OS=Mus musculus OX=10090 GN=Cbx3 PE=1 SV=1;tr|D3Z313|D3Z313_MOUSE Chromobox protein homolog 3 (Fragment) OS=Mus m	12.6207	12.7911	12.8432	12.3748	11.7563	12.1236	6298.1	7087.69	7348.33	5311.12	3459.39	4462.39	1.56686	0.647878	0.015811	1.80104
Sorting nexin-5	Snx5	sp|Q9D8U8|SNX5_MOUSE Sorting nexin-5 OS=Mus musculus OX=10090 GN=Snx5 PE=1 SV=1	12.7034	12.2317	12.497	11.8472	11.2187	11.6608	6669.67	4809.6	5780.59	3684.36	2383.23	3237.8	1.85482	0.891281	0.0158144	1.80095
40S ribosomal protein S2	Rps2	sp|P25444|RS2_MOUSE 40S ribosomal protein S2 OS=Mus musculus OX=10090 GN=Rps2 PE=1 SV=3;tr|D3YVC1|D3YVC1_MOUSE 40S ribosomal protein S2 (Fragment) OS=Mus musculus OX=10090 GN=Rps2 PE=1 SV=1;tr|D3YWJ3|D3YWJ3_MOUSE 40S ribosomal protein S2 OS=Mus musculus OX	17.527	16.5333	17.0798	15.1654	14.8804	14.7484	188866	94846	138526	36748.6	30161.1	27524	4.47127	2.16068	0.0161004	1.79316
40S ribosomal protein S23	Rps23	sp|P62267|RS23_MOUSE 40S ribosomal protein S23 OS=Mus musculus OX=10090 GN=Rps23 PE=1 SV=3	15.619	14.688	15.5377	13.5026	13.1508	13.5887	50325.4	26395.4	47567.9	11606.1	9094.63	12319.9	3.76397	1.91226	0.0162464	1.78924
Monocyte differentiation antigen CD14	Cd14	sp|P10810|CD14_MOUSE Monocyte differentiation antigen CD14 OS=Mus musculus OX=10090 GN=Cd14 PE=1 SV=1	14.0879	14.2421	13.8922	15.4505	15.905	16.3685	17413.3	19377.6	15204.4	44777.9	61359.5	84607.6	0.27259	-1.87519	0.0163708	1.78593
Coiled-coil and C2 domain-containing protein 1A	Cc2d1a	sp|Q8K1A6|C2D1A_MOUSE Coiled-coil and C2 domain-containing protein 1A OS=Mus musculus OX=10090 GN=Cc2d1a PE=1 SV=2;tr|E9PX94|E9PX94_MOUSE Coiled-coil and C2 domain-containing protein 1A OS=Mus musculus OX=10090 GN=Cc2d1a PE=1 SV=2	13.7485	13.9743	14.2371	14.7435	14.9364	15.3086	13762.9	16094.7	19310.5	27430.6	31354.8	40583.3	0.494805	-1.01507	0.0165663	1.78077
FAT atypical cadherin 1	Fat1	tr|F2Z4A3|F2Z4A3_MOUSE FAT atypical cadherin 1 OS=Mus musculus OX=10090 GN=Fat1 PE=1 SV=1;tr|A0A087WRT4|A0A087WRT4_MOUSE FAT atypical cadherin 1 OS=Mus musculus OX=10090 GN=Fat1 PE=1 SV=2;tr|A0A1L1SQU7|A0A1L1SQU7_MOUSE FAT atypical cadherin 1 OS=Mus muscul	15.9793	16.0018	16.2182	16.3471	16.3377	16.3845	64602.4	65617.8	76236.8	83361.9	82820.5	85551.2	0.820141	-0.286056	0.0167039	1.77718
Heat shock protein HSP 90-alpha	Hsp90aa1	sp|P07901|HS90A_MOUSE Heat shock protein HSP 90-alpha OS=Mus musculus OX=10090 GN=Hsp90aa1 PE=1 SV=4	15.5756	15.6126	15.1539	14.4226	14.7403	14.8169	48834.1	50102.7	36456.8	21960.1	27369.9	28862.3	1.73154	0.79206	0.0168666	1.77297
40S ribosomal protein S4, X isoform;40S ribosomal protein S4	Rps4x;Gm15013	sp|P62702|RS4X_MOUSE 40S ribosomal protein S4, X isoform OS=Mus musculus OX=10090 GN=Rps4x PE=1 SV=2;tr|V9GWY0|V9GWY0_MOUSE 40S ribosomal protein S4 OS=Mus musculus OX=10090 GN=Gm15013 PE=3 SV=1	18.2334	17.8563	17.2147	15.8977	15.7024	15.6641	308177	237291	152104	61049.8	53320.4	51923.5	4.19482	2.06861	0.0172853	1.76232
40S ribosomal protein S3a	Rps3a	sp|P97351|RS3A_MOUSE 40S ribosomal protein S3a OS=Mus musculus OX=10090 GN=Rps3a PE=1 SV=3	17.1625	16.2594	17.0557	15.3904	15.09	14.912	146699	78445.3	136231	42950.9	34877.3	30829	3.32584	1.73372	0.0173279	1.76125
Exportin-1	Xpo1	sp|Q6P5F9|XPO1_MOUSE Exportin-1 OS=Mus musculus OX=10090 GN=Xpo1 PE=1 SV=1	15.579	15.0619	14.9341	14.2731	13.4009	13.421	48949.3	34204.5	31304.9	19798.5	10816.2	10967.9	2.75257	1.46078	0.017437	1.75853
Malate dehydrogenase, cytoplasmic	Mdh1	sp|P14152|MDHC_MOUSE Malate dehydrogenase, cytoplasmic OS=Mus musculus OX=10090 GN=Mdh1 PE=1 SV=3;tr|A0A5F8MPN8|A0A5F8MPN8_MOUSE Malate dehydrogenase OS=Mus musculus OX=10090 GN=Mdh1 PE=1 SV=1	14.3532	14.5403	14.1848	13.7743	13.9318	13.5145	20928.8	23826.8	18623	14011.3	15627.5	11702.3	1.53307	0.616422	0.0176712	1.75273
High affinity copper uptake protein 1	Slc31a1	sp|Q8K211|COPT1_MOUSE High affinity copper uptake protein 1 OS=Mus musculus OX=10090 GN=Slc31a1 PE=2 SV=1	11.2947	11.9234	11.5441	12.142	12.325	12.2364	2512.14	3884.2	2986.21	4519.66	5130.91	4825.29	0.648151	-0.625599	0.0180776	1.74286
Protein lifeguard 3	Tmbim1	sp|Q8BJZ3|LFG3_MOUSE Protein lifeguard 3 OS=Mus musculus OX=10090 GN=Tmbim1 PE=1 SV=1;tr|D3Z0A5|D3Z0A5_MOUSE Protein lifeguard 3 (Fragment) OS=Mus musculus OX=10090 GN=Tmbim1 PE=1 SV=8;tr|D3Z225|D3Z225_MOUSE Protein lifeguard 3 (Fragment) OS=Mus musculus O	11.0896	11.0786	11.3453	12.0834	12.7065	12.9298	2179.23	2162.67	2601.81	4339.76	6684.02	7802.93	0.368822	-1.439	0.0183971	1.73525
BRO1 domain-containing protein BROX	Brox	sp|Q8K2Q7|BROX_MOUSE BRO1 domain-containing protein BROX OS=Mus musculus OX=10090 GN=Brox PE=1 SV=1	15.1643	15.7631	15.2208	16.7036	16.7875	17.4303	36720.5	55611.7	38187.2	106730	113120	176621	0.329203	-1.60295	0.0185457	1.73176
Latrophilin-2	Lphn2	sp|Q8JZZ7|AGRL2_MOUSE Adhesion G protein-coupled receptor L2 OS=Mus musculus OX=10090 GN=Adgrl2 PE=1 SV=3;tr|A0A0G2JFV3|A0A0G2JFV3_MOUSE Adhesion G protein-coupled receptor L2 OS=Mus musculus OX=10090 GN=Adgrl2 PE=1 SV=1;tr|A0A0G2JDE3|A0A0G2JDE3_MOUSE Adhe	14.0617	14.1572	14.6274	15.518	15.8915	16.3813	17099.9	18270.1	25309.7	46922.8	60788	85361.6	0.314285	-1.66986	0.018646	1.72941
Lysine-specific demethylase 6A	Kdm6a	sp|O70546|KDM6A_MOUSE Lysine-specific demethylase 6A OS=Mus musculus OX=10090 GN=Kdm6a PE=1 SV=2;tr|A0A286YD05|A0A286YD05_MOUSE Lysine-specific demethylase 6A (Fragment) OS=Mus musculus OX=10090 GN=Kdm6a PE=1 SV=1	10.1771	10.9853	11.1094	13.5481	12.5393	13.6729	1157.74	2027.24	2209.34	11978	5952.58	13060.3	0.174062	-2.52233	0.0188104	1.7256
Vacuolar protein sorting-associated protein 37A	Vps37a	sp|Q8CHS8|VP37A_MOUSE Vacuolar protein sorting-associated protein 37A OS=Mus musculus OX=10090 GN=Vps37a PE=1 SV=1	10.929	11.904	11.1322	12.2026	12.463	12.657	1949.65	3832.31	2244.53	4713.56	5645.95	6458.57	0.477254	-1.06717	0.0191678	1.71743
DnaJ homolog subfamily B member 4	Dnajb4	sp|Q9D832|DNJB4_MOUSE DnaJ homolog subfamily B member 4 OS=Mus musculus OX=10090 GN=Dnajb4 PE=1 SV=1	11.4842	10.8243	10.963	12.1595	12.1596	12.7367	2864.76	1813.17	1996.14	4574.82	4575.14	6825.41	0.417773	-1.25921	0.0192083	1.71651
Protein LAP2	Erbb2ip	sp|Q80TH2|ERBIN_MOUSE Erbin OS=Mus musculus OX=10090 GN=Erbin PE=1 SV=3;tr|B2RUJ2|B2RUJ2_MOUSE Erbb2ip protein OS=Mus musculus OX=10090 GN=Erbin PE=1 SV=1;tr|B7ZNX6|B7ZNX6_MOUSE Erbb2ip protein OS=Mus musculus OX=10090 GN=Erbin PE=1 SV=1	11.6224	11.9538	11.7442	12.1787	12.2755	12.0839	3152.76	3966.91	3430.49	4636.11	4957.85	4341.27	0.757086	-0.401472	0.0193259	1.71386
Guanine nucleotide-binding protein subunit alpha-13	Gna13	sp|P27601|GNA13_MOUSE Guanine nucleotide-binding protein subunit alpha-13 OS=Mus musculus OX=10090 GN=Gna13 PE=1 SV=1	13.3748	13.2356	13.6113	13.8934	14.3811	14.1717	10622.2	9645.23	12514.4	15217	21337.4	18454.7	0.595934	-0.746775	0.0193736	1.71279
Sodium/potassium-transporting ATPase subunit beta-1	Atp1b1	sp|P14094|AT1B1_MOUSE Sodium/potassium-transporting ATPase subunit beta-1 OS=Mus musculus OX=10090 GN=Atp1b1 PE=1 SV=1;tr|A0A0A6YX05|A0A0A6YX05_MOUSE Sodium/potassium-transporting ATPase subunit beta (Fragment) OS=Mus musculus OX=10090 GN=Atp1b1 PE=1 SV=1	10.7043	12.0997	12.222	12.7243	12.9838	13.0549	1668.46	4389.07	4777.37	6767	8100.53	8509.74	0.46348	-1.10942	0.0196975	1.70559
Niban-like protein 1	Fam129b	sp|Q8R1F1|NIBA2_MOUSE Protein Niban 2 OS=Mus musculus OX=10090 GN=Niban2 PE=1 SV=2	10.4241	10.2398	10.3961	10.7763	10.928	11.2136	1373.94	1209.17	1347.53	1753.84	1948.3	2374.82	0.64681	-0.628586	0.0198066	1.70319
Translationally-controlled tumor protein	Tpt1	sp|P63028|TCTP_MOUSE Translationally-controlled tumor protein OS=Mus musculus OX=10090 GN=Tpt1 PE=1 SV=1;tr|D3YU75|D3YU75_MOUSE Translationally-controlled tumor protein OS=Mus musculus OX=10090 GN=Tpt1 PE=1 SV=1	11.6844	11.8319	12.858	13.5659	13.3805	13.1709	3291.2	3645.5	7424.1	12126.7	10664.3	9222.23	0.44859	-1.15653	0.0198159	1.70299
6-phosphogluconate dehydrogenase, decarboxylating	Pgd	sp|Q9DCD0|6PGD_MOUSE 6-phosphogluconate dehydrogenase, decarboxylating OS=Mus musculus OX=10090 GN=Pgd PE=1 SV=3	12.966	12.6272	12.8044	12.4222	12.1369	11.9141	8001.2	6326.54	7153.33	5488.51	4503.72	3859.24	1.55082	0.633027	0.019821	1.70287
Sorting nexin-9	Snx9	sp|Q91VH2|SNX9_MOUSE Sorting nexin-9 OS=Mus musculus OX=10090 GN=Snx9 PE=1 SV=1	13.5175	14.0691	13.746	14.7291	14.7241	15.2882	11726.6	17187.8	13739.1	27158.2	27064.2	40013.5	0.452625	-1.14361	0.0199732	1.69955
GTPase HRas;GTPase HRas, N-terminally processed;GTPase NRas	Hras;Nras	sp|Q61411|RASH_MOUSE GTPase HRas OS=Mus musculus OX=10090 GN=Hras PE=1 SV=2;sp|P08556|RASN_MOUSE GTPase NRas OS=Mus musculus OX=10090 GN=Nras PE=1 SV=1;tr|A0A0G2JE25|A0A0G2JE25_MOUSE GTPase NRas (Fragment) OS=Mus musculus OX=10090 GN=Nras PE=1 SV=1;tr|A0A0	12.3659	12.1664	12.6	12.8503	13.0052	13.2436	5278.45	4596.75	6208.38	7384.58	8221.58	9698.86	0.635589	-0.653835	0.02014	1.69594
Very low-density lipoprotein receptor	Vldlr	sp|P98156|VLDLR_MOUSE Very low-density lipoprotein receptor OS=Mus musculus OX=10090 GN=Vldlr PE=1 SV=1;tr|F6RKS4|F6RKS4_MOUSE Very low-density lipoprotein receptor (Fragment) OS=Mus musculus OX=10090 GN=Vldlr PE=1 SV=1;tr|F8WIN7|F8WIN7_MOUSE Very low-dens	11.7818	11.8707	11.8356	12.6177	12.4937	12.1605	3521.07	3744.87	3654.86	6285.01	5767.38	4577.99	0.656678	-0.606743	0.0202011	1.69462
Acetyl-CoA acetyltransferase, cytosolic	Acat2;Acat3	sp|Q8CAY6|THIC_MOUSE Acetyl-CoA acetyltransferase, cytosolic OS=Mus musculus OX=10090 GN=Acat2 PE=1 SV=2;tr|Q80X81|Q80X81_MOUSE Acetyl-Coenzyme A acetyltransferase 3 OS=Mus musculus OX=10090 GN=Acat3 PE=1 SV=1;tr|G3XA25|G3XA25_MOUSE Acetyl-CoA acetyltransf	13.6315	13.0146	13.3371	12.5798	12.3138	12.4123	12690.8	8275.32	10348.3	6122.05	5091.24	5450.98	1.87914	0.910069	0.0203727	1.69095
DNA nucleotidylexotransferase	Dntt	sp|P09838|TDT_MOUSE DNA nucleotidylexotransferase OS=Mus musculus OX=10090 GN=Dntt PE=1 SV=4	15.1848	15.3699	15.7338	16.311	16.0515	16.5833	37246.1	42344.9	54493.6	81301.8	67917.7	98190.8	0.541952	-0.883762	0.0203994	1.69038
Actin-related protein 2/3 complex subunit 5	Arpc5	sp|Q9CPW4|ARPC5_MOUSE Actin-related protein 2/3 complex subunit 5 OS=Mus musculus OX=10090 GN=Arpc5 PE=1 SV=3;tr|Q3UA72|Q3UA72_MOUSE Actin-related protein 2/3 complex subunit 5 OS=Mus musculus OX=10090 GN=Arpc5 PE=1 SV=1	12.9875	13.4099	13.3422	13.7828	13.7779	14.1097	8121.33	10883.8	10384.9	14094.1	14046.3	17678.4	0.641442	-0.640609	0.0205075	1.68809
Cleavage and polyadenylation specificity factor subunit 5	Nudt21	sp|Q9CQF3|CPSF5_MOUSE Cleavage and polyadenylation specificity factor subunit 5 OS=Mus musculus OX=10090 GN=Nudt21 PE=1 SV=1;tr|A0A1D5RM23|A0A1D5RM23_MOUSE Cleavage and polyadenylation specificity factor subunit 5 OS=Mus musculus OX=10090 GN=Nudt21 PE=1 SV	12.6676	12.493	13.0563	13.3618	13.8255	13.9562	6506.2	5764.58	8518.01	10527	14517.4	15894.1	0.507806	-0.977651	0.0205453	1.68729
Rho-related BTB domain-containing protein 3	Rhobtb3	sp|Q9CTN4|RHBT3_MOUSE Rho-related BTB domain-containing protein 3 OS=Mus musculus OX=10090 GN=Rhobtb3 PE=2 SV=3;tr|Q8BV11|Q8BV11_MOUSE Rho-related BTB domain-containing protein 3 OS=Mus musculus OX=10090 GN=Rhobtb3 PE=1 SV=1	11.8635	12.2023	10.8857	12.7051	12.759	12.6005	3726.23	4712.58	1892	6677.54	6931.73	6210.53	0.521237	-0.939989	0.0206855	1.68433
CD276 antigen	Cd276	tr|A0A1L1SUD4|A0A1L1SUD4_MOUSE CD276 antigen (Fragment) OS=Mus musculus OX=10090 GN=Cd276 PE=1 SV=1;sp|Q8VE98|CD276_MOUSE CD276 antigen OS=Mus musculus OX=10090 GN=Cd276 PE=1 SV=1	11.298	11.178	10.939	11.9089	12.5337	12.0684	2517.89	2316.93	1963.21	3845.35	5929.52	4294.87	0.483167	-1.04941	0.0206873	1.6843
Glypican-1;Secreted glypican-1	Gpc1	sp|Q9QZF2|GPC1_MOUSE Glypican-1 OS=Mus musculus OX=10090 GN=Gpc1 PE=1 SV=1	13.5501	13.3325	13.7323	14.1967	14.3288	14.7402	11994.6	10315.3	13609.3	18777.3	20577.8	27368	0.538333	-0.89343	0.0210308	1.67714
Drebrin-like protein	Dbnl	sp|Q62418|DBNL_MOUSE Drebrin-like protein OS=Mus musculus OX=10090 GN=Dbnl PE=1 SV=2	10.6365	9.82446	10.7741	11.1846	11.2174	11.4254	1591.86	906.687	1751.17	2327.56	2381.08	2750.35	0.569744	-0.811613	0.0213146	1.67132
Neurogenic locus notch homolog protein 2;Notch 2 extracellular truncation;Notch 2 intracellular domain	Notch2	sp|O35516|NOTC2_MOUSE Neurogenic locus notch homolog protein 2 OS=Mus musculus OX=10090 GN=Notch2 PE=1 SV=2	11.1821	10.8655	11.1762	11.5644	11.5507	11.3654	2323.53	1865.7	2314.04	3028.53	2999.9	2638.31	0.750371	-0.414325	0.0213671	1.67026
LIM and SH3 domain protein 1	Lasp1	sp|Q61792|LASP1_MOUSE LIM and SH3 domain protein 1 OS=Mus musculus OX=10090 GN=Lasp1 PE=1 SV=1;tr|A2A6H1|A2A6H1_MOUSE LIM and SH3 domain protein 1 (Fragment) OS=Mus musculus OX=10090 GN=Lasp1 PE=1 SV=1;tr|A2A6G6|A2A6G6_MOUSE LIM and SH3 domain protein 1 (F	13.1893	12.8891	13.2174	14.2359	14.5834	15.1141	9340.6	7585.88	9524.32	19294.5	24549.4	35464.8	0.333517	-1.58417	0.0214107	1.66937
Ras-related protein Rab-31	Rab31	sp|Q921E2|RAB31_MOUSE Ras-related protein Rab-31 OS=Mus musculus OX=10090 GN=Rab31 PE=1 SV=1;tr|Q3TXV4|Q3TXV4_MOUSE Rab22B OS=Mus musculus OX=10090 GN=Rab31 PE=1 SV=1	14.632	15.0007	15.1018	15.4352	15.9327	15.9812	25390.5	32783.9	35163.7	44305.6	62549	64687.5	0.544112	-0.878025	0.0214109	1.66937
Protocadherin beta-18	Pcdhb18	sp|Q91Y02|PCDBI_MOUSE Protocadherin beta-18 OS=Mus musculus OX=10090 GN=Pcdhb18 PE=2 SV=1	11.3579	10.8686	11.5969	12.1139	12.1901	11.8368	2624.63	1869.71	3097.52	4432.48	4672.89	3657.9	0.594821	-0.749472	0.0215469	1.66661
Ribonucleoside-diphosphate reductase large subunit	Rrm1	sp|P07742|RIR1_MOUSE Ribonucleoside-diphosphate reductase large subunit OS=Mus musculus OX=10090 GN=Rrm1 PE=1 SV=2	12.4408	12.1977	12.0699	11.8385	11.5116	11.3191	5559.73	4697.57	4299.34	3662.21	2919.69	2554.99	1.59317	0.671903	0.0217011	1.66352
Tax1-binding protein 3	Tax1bp3	sp|Q9DBG9|TX1B3_MOUSE Tax1-binding protein 3 OS=Mus musculus OX=10090 GN=Tax1bp3 PE=1 SV=1	11.8514	12.1259	12.5819	12.9301	12.8195	12.8444	3695.11	4469.51	6130.97	7804.55	7228.6	7354.44	0.63855	-0.64713	0.0218203	1.66114
Protein kinase C and casein kinase substrate in neurons protein 2	Pacsin2	sp|Q9WVE8|PACN2_MOUSE Protein kinase C and casein kinase substrate in neurons protein 2 OS=Mus musculus OX=10090 GN=Pacsin2 PE=1 SV=1;tr|A0A2R8W6S4|A0A2R8W6S4_MOUSE Protein kinase C and casein kinase substrate in neurons protein 2 (Fragment) OS=Mus musculu	17.3771	17.652	17.7403	18.7775	18.9085	19.5587	170227	205959	218959	449356	492069	772245	0.347293	-1.52578	0.0218806	1.65994
Eukaryotic translation initiation factor 5A-1;Eukaryotic translation initiation factor 5A;Eukaryotic translation initiation factor 5A-2	Eif5a;Eif5a2	sp|P63242|IF5A1_MOUSE Eukaryotic translation initiation factor 5A-1 OS=Mus musculus OX=10090 GN=Eif5a PE=1 SV=2;tr|A0A0A0MQM0|A0A0A0MQM0_MOUSE Eukaryotic translation initiation factor 5A (Fragment) OS=Mus musculus OX=10090 GN=Eif5a PE=1 SV=1;sp|Q8BGY2|IF5A	15.0687	15.2615	15.4238	15.554	15.7178	15.6355	34366.1	39279.8	43956.8	48108.4	53892.6	50904.3	0.769122	-0.378716	0.0219804	1.65796
Polyubiquitin-C;Ubiquitin;Ubiquitin-related 1;Ubiquitin-related 2;Polyubiquitin-B;Ubiquitin;Ubiquitin-40S ribosomal protein S27a;Ubiquitin;40S ribosomal protein S27a;Ubiquitin-60S ribosomal protein L40;Ubiquitin;60S ribosomal protein L40	Ubc;Ubb;Rps27a;Uba52;Gm8797;Kxd1	sp|P0CG50|UBC_MOUSE Polyubiquitin-C OS=Mus musculus OX=10090 GN=Ubc PE=1 SV=2;sp|P0CG49|UBB_MOUSE Polyubiquitin-B OS=Mus musculus OX=10090 GN=Ubb PE=2 SV=1;sp|P62983|RS27A_MOUSE Ubiquitin-40S ribosomal protein S27a OS=Mus musculus OX=10090 GN=Rps27a PE=1 S	18.9728	18.2254	19.5861	20.489	20.5033	19.9147	514496	306473	787052	1.47165e+06	1.48631e+06	988376	0.407473	-1.29522	0.022174	1.65416
Heat shock protein HSP 90-beta	Hsp90ab1	sp|P11499|HS90B_MOUSE Heat shock protein HSP 90-beta OS=Mus musculus OX=10090 GN=Hsp90ab1 PE=1 SV=3	19.1482	18.7602	18.56	17.8661	17.6931	18.1389	581009	444000	386471	238909	211911	288638	1.9088	0.932669	0.0224037	1.64968
Heterogeneous nuclear ribonucleoprotein A/B	Hnrnpab	sp|Q99020|ROAA_MOUSE Heterogeneous nuclear ribonucleoprotein A/B OS=Mus musculus OX=10090 GN=Hnrnpab PE=1 SV=1;tr|Q20BD0|Q20BD0_MOUSE Heterogeneous nuclear ribonucleoprotein A/B OS=Mus musculus OX=10090 GN=Hnrnpab PE=1 SV=1;tr|Q80XR6|Q80XR6_MOUSE Heterogen	11.6003	11.6059	11.9939	11.1081	9.77645	10.7742	3104.83	3116.91	4078.72	2207.35	877.01	1751.29	2.13011	1.09093	0.0228149	1.64178
Heat shock 70 kDa protein 4	Hspa4	sp|Q61316|HSP74_MOUSE Heat shock 70 kDa protein 4 OS=Mus musculus OX=10090 GN=Hspa4 PE=1 SV=1;tr|Q3U2G2|Q3U2G2_MOUSE Heat shock 70 kDa protein 4 OS=Mus musculus OX=10090 GN=Hspa4 PE=1 SV=1	16.9107	16.3844	16.476	15.9607	15.6698	15.656	123205	85545.2	91152.8	63774.9	52129.1	51632.8	1.79007	0.840019	0.0235234	1.6285
Serine protease HTRA1	Htra1	sp|Q9R118|HTRA1_MOUSE Serine protease HTRA1 OS=Mus musculus OX=10090 GN=Htra1 PE=1 SV=2	14.5456	13.8616	14.0903	13.142	12.6359	13.2789	23914.5	14885.3	17442.3	9039.33	6364.8	9939.1	2.21922	1.15005	0.023593	1.62722
Ribosomal protein;60S ribosomal protein L10a	Rpl10a	tr|A0A3B2WDD2|A0A3B2WDD2_MOUSE Ribosomal protein OS=Mus musculus OX=10090 GN=Rpl10a PE=1 SV=1;tr|A0A3B2WBL1|A0A3B2WBL1_MOUSE Ribosomal protein OS=Mus musculus OX=10090 GN=Rpl10a PE=1 SV=1;tr|Q5XJF6|Q5XJF6_MOUSE Ribosomal protein OS=Mus musculus OX=10090 GN	15.7828	15.4494	14.8312	14.2395	13.4121	13.3899	56376.3	44743.8	29149.8	19342.7	10900.4	10734	3.17909	1.66861	0.0237937	1.62354
Ras-related protein Rab-34	Rab-34	tr|A0A140LIX7|A0A140LIX7_MOUSE Ras-related protein Rab-34 OS=Mus musculus OX=10090 GN=Rab34 PE=4 SV=1	21.9579	21.4415	22.3687	22.8396	22.7828	23.2618	4.07368e+06	2.84797e+06	5.41564e+06	7.50593e+06	7.21616e+06	1.00577e+07	0.497876	-1.00614	0.023794	1.62353
Ras-related protein Rap-1b	Rap1b	sp|Q99JI6|RAP1B_MOUSE Ras-related protein Rap-1b OS=Mus musculus OX=10090 GN=Rap1b PE=1 SV=2	14.6788	14.2258	14.9983	15.351	15.5747	15.2568	26227.6	19159.9	32729.4	41793.8	48803.6	39152	0.60206	-0.732021	0.0240275	1.61929
Ras-related protein Rab-6A;Ras-related protein Rab-6B	Rab6a;Rab6b	sp|P35279|RAB6A_MOUSE Ras-related protein Rab-6A OS=Mus musculus OX=10090 GN=Rab6a PE=1 SV=4;sp|P61294|RAB6B_MOUSE Ras-related protein Rab-6B OS=Mus musculus OX=10090 GN=Rab6b PE=1 SV=1;tr|D3YV69|D3YV69_MOUSE Ras-related protein Rab-6A OS=Mus musculus OX=1	16.4532	16.4176	16.1639	16.5934	16.8097	16.7517	89723.6	87536.7	73420.7	98880.6	114875	110348	0.773461	-0.3706	0.0247838	1.60583
Dystroglycan;Alpha-dystroglycan;Beta-dystroglycan	Dag1	sp|Q62165|DAG1_MOUSE Dystroglycan OS=Mus musculus OX=10090 GN=Dag1 PE=1 SV=4	14.4374	14.3342	15.2439	15.4431	15.6328	15.7246	22186.6	20655	38803.5	44548.8	50809.1	54147.2	0.546102	-0.872758	0.0248157	1.60527
14-3-3 protein gamma;14-3-3 protein gamma, N-terminally processed	Ywhag	sp|P61982|1433G_MOUSE 14-3-3 protein gamma OS=Mus musculus OX=10090 GN=Ywhag PE=1 SV=2	13.1394	13.4531	13.5899	14.2567	14.2571	13.8073	9023.05	11214.7	12330.1	19574.7	19580.1	14335.5	0.608856	-0.715826	0.0251566	1.59935
Sodium-coupled neutral amino acid transporter 2	Slc38a2	sp|Q8CFE6|S38A2_MOUSE Sodium-coupled neutral amino acid transporter 2 OS=Mus musculus OX=10090 GN=Slc38a2 PE=1 SV=1	10.5193	9.06981	8.30831	10.8949	11.1478	10.961	1467.66	537.384	316.994	1904.11	2268.94	1993.38	0.376561	-1.40904	0.0255862	1.59199
Spliceosome RNA helicase Ddx39b	Ddx39b	sp|Q9Z1N5|DX39B_MOUSE Spliceosome RNA helicase Ddx39b OS=Mus musculus OX=10090 GN=Ddx39b PE=1 SV=1;tr|G3UXI6|G3UXI6_MOUSE Spliceosome RNA helicase Ddx39b (Fragment) OS=Mus musculus OX=10090 GN=Ddx39b PE=1 SV=1	16.5183	15.691	15.7262	14.6127	14.0411	14.0029	93865	52900.7	54207.3	25053.1	16857.5	16417	3.4456	1.78475	0.0257593	1.58907
ATPase PAAT	Paat	sp|Q9D2Q3|PAAT_MOUSE ATPase PAAT OS=Mus musculus OX=10090 GN=Paat PE=2 SV=1;tr|A0A140LJB8|A0A140LJB8_MOUSE RIKEN cDNA 2310057M21 gene OS=Mus musculus OX=10090 GN=2310057M21Rik PE=1 SV=1;tr|A0A140LJK0|A0A140LJK0_MOUSE RIKEN cDNA 2310057M21 gene (Fragment) O	12.0392	11.5938	10.9069	12.9474	12.3238	12.8556	4208.82	3090.88	1920.01	7898.7	5126.65	7411.76	0.451126	-1.1484	0.0257811	1.5887
Cytoplasmic aconitate hydratase;Iron-responsive element-binding protein 2	Aco1;Ireb2	sp|P28271|ACOC_MOUSE Cytoplasmic aconitate hydratase OS=Mus musculus OX=10090 GN=Aco1 PE=1 SV=3;sp|Q811J3|IREB2_MOUSE Iron-responsive element-binding protein 2 OS=Mus musculus OX=10090 GN=Ireb2 PE=1 SV=2	14.2243	14.2273	13.395	12.6414	12.8832	12.4078	19140	19179.8	10772	6389.11	7554.92	5434	2.53337	1.34106	0.0258135	1.58815
Charged multivesicular body protein 3	Chmp3	sp|Q9CQ10|CHMP3_MOUSE Charged multivesicular body protein 3 OS=Mus musculus OX=10090 GN=Chmp3 PE=1 SV=3	14.2954	14.2901	14.4202	15.1993	15.5508	16.0429	20106.9	20033.1	21923.6	37622.3	48001.8	67514	0.405279	-1.30301	0.0259105	1.58652
Epithelial discoidin domain-containing receptor 1	Ddr1	sp|Q03146|DDR1_MOUSE Epithelial discoidin domain-containing receptor 1 OS=Mus musculus OX=10090 GN=Ddr1 PE=2 SV=2	13.5218	14.2092	14.0164	14.5954	14.534	14.4319	11761.6	18940.7	16571.3	24754.4	23723	22102.2	0.669791	-0.578217	0.0259382	1.58606
Galactokinase	Galk1	sp|Q9R0N0|GALK1_MOUSE Galactokinase OS=Mus musculus OX=10090 GN=Galk1 PE=1 SV=2	12.6418	12.1403	11.8405	10.7541	11.2558	10.733	6390.88	4514.34	3667.29	1727.06	2445.31	1701.98	2.48071	1.31075	0.0260961	1.58342
Protocadherin 10	Pcdh10	tr|Q925I8|Q925I8_MOUSE OL-protocadherin isoform OS=Mus musculus OX=10090 GN=Pcdh10 PE=1 SV=1;tr|E9PX28|E9PX28_MOUSE Protocadherin 10 OS=Mus musculus OX=10090 GN=Pcdh10 PE=1 SV=1;tr|E9PXQ7|E9PXQ7_MOUSE Protocadherin 10 OS=Mus musculus OX=10090 GN=Pcdh10 PE=	11.1885	10.3339	10.2255	11.7289	12.0901	11.4958	2333.86	1290.67	1197.24	3394.3	4359.96	2887.89	0.453082	-1.14216	0.026433	1.57785
Sodium/myo-inositol cotransporter	Slc5a3	sp|Q9JKZ2|SC5A3_MOUSE Sodium/myo-inositol cotransporter OS=Mus musculus OX=10090 GN=Slc5a3 PE=1 SV=2	13.0113	13.1286	13.5097	14.2169	15.2669	15.0744	8256.42	8955.76	11663.4	19042	39427.1	34502.2	0.310586	-1.68694	0.0265271	1.57631
Uridine 5-monophosphate synthase;Orotate phosphoribosyltransferase;Orotidine 5-phosphate decarboxylase	Umps	sp|P13439|UMPS_MOUSE Uridine 5-monophosphate synthase OS=Mus musculus OX=10090 GN=Umps PE=1 SV=3	12.4295	12.0077	11.5778	10.9616	10.2469	10.8179	5516.36	4117.92	3056.79	1994.21	1215.13	1805.15	2.53088	1.33964	0.0269696	1.56913
UV excision repair protein RAD23 homolog B	Rad23b	sp|P54728|RD23B_MOUSE UV excision repair protein RAD23 homolog B OS=Mus musculus OX=10090 GN=Rad23b PE=1 SV=2	10.743	11.2467	11.3283	11.7076	11.5452	11.7457	1713.82	2429.93	2571.33	3344.56	2988.49	3434.06	0.68752	-0.540526	0.0270099	1.56848
Cytoplasmic FMR1-interacting protein 1	Cyfip1	sp|Q7TMB8|CYFP1_MOUSE Cytoplasmic FMR1-interacting protein 1 OS=Mus musculus OX=10090 GN=Cyfip1 PE=1 SV=1;tr|A0A0R4J119|A0A0R4J119_MOUSE Cytoplasmic FMR1-interacting protein OS=Mus musculus OX=10090 GN=Cyfip1 PE=1 SV=1;tr|A0A0U1RQ05|A0A0U1RQ05_MOUSE Cytopl	15.5445	15.3747	14.9076	14.4332	14.5451	14.5025	47792.6	42486	30735.1	22122.1	23906.2	23210.7	1.74777	0.805514	0.0271189	1.56673
FAS-associated factor 1	Faf1	sp|P54731|FAF1_MOUSE FAS-associated factor 1 OS=Mus musculus OX=10090 GN=Faf1 PE=1 SV=2	13.497	14.1256	13.9497	15.3306	15.4381	16.2263	11561.2	17874.3	15822.6	41206.9	44394.7	76666	0.27891	-1.84213	0.0273214	1.5635
Ras-related protein Rab-34	Rab34	sp|Q64008|RAB34_MOUSE Ras-related protein Rab-34 OS=Mus musculus OX=10090 GN=Rab34 PE=1 SV=2;tr|F7BE32|F7BE32_MOUSE Ras-related protein Rab-34 (Fragment) OS=Mus musculus OX=10090 GN=Rab34 PE=1 SV=1;tr|B1AQD3|B1AQD3_MOUSE Ras-related protein Rab-34 OS=Mus m	10.4688	10.7512	11.2365	11.8357	11.6221	11.427	1417.17	1723.59	2412.81	3655.11	3152.11	2753.4	0.58088	-0.783688	0.0273904	1.5624
Insulin-like growth factor-binding protein 3	Igfbp3	sp|P47878|IBP3_MOUSE Insulin-like growth factor-binding protein 3 OS=Mus musculus OX=10090 GN=Igfbp3 PE=2 SV=2	11.6188	11.9862	11.9727	12.1635	12.3661	12.2929	3144.9	4057.01	4019.22	4587.52	5279.19	5018.01	0.753869	-0.407614	0.0274171	1.56198
Peroxiredoxin-5, mitochondrial	Prdx5	sp|P99029|PRDX5_MOUSE Peroxiredoxin-5, mitochondrial OS=Mus musculus OX=10090 GN=Prdx5 PE=1 SV=2;tr|A0A494BAZ4|A0A494BAZ4_MOUSE Peroxiredoxin (Fragment) OS=Mus musculus OX=10090 GN=Prdx5 PE=1 SV=1;tr|G3UZJ4|G3UZJ4_MOUSE Peroxiredoxin-5, mitochondrial OS=Mu	11.2609	11.8837	11.2651	12.3896	12.0608	12.1686	2453.97	3778.77	2461.12	5365.88	4272.31	4603.77	0.610439	-0.71208	0.0276985	1.55754
T-complex protein 1 subunit theta	Cct8	sp|P42932|TCPQ_MOUSE T-complex protein 1 subunit theta OS=Mus musculus OX=10090 GN=Cct8 PE=1 SV=3;tr|H3BL49|H3BL49_MOUSE T-complex protein 1 subunit theta OS=Mus musculus OX=10090 GN=Cct8 PE=1 SV=1;tr|H3BJB6|H3BJB6_MOUSE T-complex protein 1 subunit theta (	17.4792	17.1707	16.6625	16.2246	15.7825	15.8969	182710	147535	103732	76575.8	56364.5	61016	2.2375	1.16189	0.0277012	1.5575
Interleukin enhancer-binding factor 2	Ilf2	sp|Q9CXY6|ILF2_MOUSE Interleukin enhancer-binding factor 2 OS=Mus musculus OX=10090 GN=Ilf2 PE=1 SV=1	14.6164	14.6179	15.1823	15.6914	15.62	16.2129	25117.4	25143.5	37181.6	52915.4	50360.3	75957.2	0.487871	-1.03543	0.0280246	1.55246
40S ribosomal protein S9	Rps9	sp|Q6ZWN5|RS9_MOUSE 40S ribosomal protein S9 OS=Mus musculus OX=10090 GN=Rps9 PE=1 SV=3;tr|F7CJS8|F7CJS8_MOUSE 40S ribosomal protein S9 (Fragment) OS=Mus musculus OX=10090 GN=Rps9 PE=1 SV=1;tr|D3YWH9|D3YWH9_MOUSE 40S ribosomal protein S9 OS=Mus musculus OX	17.9865	16.7737	17.3569	15.3501	15.0865	14.7455	259702	112044	167860	41767.7	34792.8	27468.7	5.18707	2.37492	0.0283697	1.54715
Coactosin-like protein	Cotl1	sp|Q9CQI6|COTL1_MOUSE Coactosin-like protein OS=Mus musculus OX=10090 GN=Cotl1 PE=1 SV=3	11.7258	11.5372	12.852	13.0889	13.248	13.4314	3387.02	2971.96	7393.29	8712.67	9728.49	11047.3	0.466362	-1.10048	0.0284294	1.54623
26S proteasome non-ATPase regulatory subunit 4	Psmd4	sp|O35226|PSMD4_MOUSE 26S proteasome non-ATPase regulatory subunit 4 OS=Mus musculus OX=10090 GN=Psmd4 PE=1 SV=1	13.195	12.6593	12.7878	12.2399	12.1315	12.1715	9377.58	6468.88	7071.5	4837.01	4486.89	4613.03	1.6444	0.717565	0.0284325	1.54618
Acyl-CoA-binding protein	Dbi	sp|P31786|ACBP_MOUSE Acyl-CoA-binding protein OS=Mus musculus OX=10090 GN=Dbi PE=1 SV=2;tr|D3Z563|D3Z563_MOUSE Acyl-CoA-binding protein OS=Mus musculus OX=10090 GN=Dbi PE=1 SV=1;tr|Q4VWZ5|Q4VWZ5_MOUSE Acyl-CoA-binding protein OS=Mus musculus OX=10090 GN=Db	16.3446	17.1708	16.8735	17.5547	17.3612	17.5776	83217.5	147545	120069	192527	168361	195607	0.630431	-0.66559	0.0288576	1.53974
Carbonic anhydrase 2	Ca2	sp|P00920|CAH2_MOUSE Carbonic anhydrase 2 OS=Mus musculus OX=10090 GN=Ca2 PE=1 SV=4	11.2386	11.9261	11.8456	12.726	12.3246	12.3404	2416.33	3891.47	3680.28	6774.98	5129.49	5185.98	0.584425	-0.774911	0.0288869	1.5393
Choline transporter-like protein 2	Slc44a2	sp|Q8BY89|CTL2_MOUSE Choline transporter-like protein 2 OS=Mus musculus OX=10090 GN=Slc44a2 PE=1 SV=2;tr|A0A1L1SVG6|A0A1L1SVG6_MOUSE Choline transporter-like protein 2 OS=Mus musculus OX=10090 GN=Slc44a2 PE=1 SV=1	9.21864	10.335	10.4598	10.9889	11.14	11.5893	595.782	1291.65	1408.36	2032.3	2256.7	3081.25	0.447175	-1.16109	0.0290219	1.53727
ATPase Asna1	Asna1	sp|O54984|GET3_MOUSE ATPase GET3 OS=Mus musculus OX=10090 GN=Get3 PE=1 SV=2;tr|A0A1B0GRE1|A0A1B0GRE1_MOUSE ArsA arsenite transporter, ATP-binding, homolog 1 (bacterial) (Fragment) OS=Mus musculus OX=10090 GN=Asna1 PE=1 SV=1	12.7748	12.3044	12.5358	12.1065	11.211	11.537	7008.06	5058.17	5938.16	4409.81	2370.54	2971.55	1.84625	0.884594	0.0292026	1.53458
Protein mago nashi homolog 2;Protein mago nashi homolog	Magohb;Magoh	sp|Q9CQL1|MGN2_MOUSE Protein mago nashi homolog 2 OS=Mus musculus OX=10090 GN=Magohb PE=2 SV=1;sp|P61327|MGN_MOUSE Protein mago nashi homolog OS=Mus musculus OX=10090 GN=Magoh PE=2 SV=1;tr|G3UZW7|G3UZW7_MOUSE Protein mago nashi homolog 2 OS=Mus musculus OX	9.9719	9.3325	10.0345	10.5329	10.2758	10.5604	1004.25	644.707	1048.78	1481.56	1239.72	1510.07	0.63756	-0.649368	0.0293952	1.53172
NT-3 growth factor receptor;Tyrosine-protein kinase receptor	Ntrk3	sp|Q6VNS1|NTRK3_MOUSE NT-3 growth factor receptor OS=Mus musculus OX=10090 GN=Ntrk3 PE=1 SV=1;tr|A0A0A6YWL7|A0A0A6YWL7_MOUSE Tyrosine-protein kinase receptor OS=Mus musculus OX=10090 GN=Ntrk3 PE=1 SV=1;tr|A0A0A6YWF9|A0A0A6YWF9_MOUSE Tyrosine-protein kinase	10.3822	9.2256	10.2381	10.8903	11.7992	11.5811	1334.61	598.663	1207.74	1898.05	3563.8	3063.79	0.36842	-1.44058	0.0298246	1.52543
Endothelin-1 receptor	Ednra	sp|Q61614|EDNRA_MOUSE Endothelin-1 receptor OS=Mus musculus OX=10090 GN=Ednra PE=2 SV=3	10.63	10.9136	10.9398	12.0795	13.0808	13.3485	1584.71	1928.95	1964.3	4328.05	8663.89	10430.4	0.233878	-2.09617	0.0301569	1.52061
Zinc finger SWIM domain-containing protein 1	Zswim1	sp|Q9CWV7|ZSWM1_MOUSE Zinc finger SWIM domain-containing protein 1 OS=Mus musculus OX=10090 GN=Zswim1 PE=2 SV=1	13.4412	14.0577	14.0467	15.9537	15.881	16.9069	11122.6	17052.6	16923	63466.2	60347.2	122881	0.18281	-2.45158	0.0302761	1.5189
Elongation factor 2	Eef2	sp|P58252|EF2_MOUSE Elongation factor 2 OS=Mus musculus OX=10090 GN=Eef2 PE=1 SV=2	19.3257	18.9445	18.3668	17.6798	17.4237	17.6189	657076	504502	338032	209967	175815	201288	2.5544	1.35298	0.0304597	1.51627
Target of Myb protein 1	Tom1	sp|O88746|TOM1_MOUSE Target of Myb protein 1 OS=Mus musculus OX=10090 GN=Tom1 PE=1 SV=1;tr|Q3UDC3|Q3UDC3_MOUSE Target of Myb protein 1 OS=Mus musculus OX=10090 GN=Tom1 PE=1 SV=1;tr|A0A1D5RM45|A0A1D5RM45_MOUSE Target of Myb protein 1 (Fragment) OS=Mus muscu	10.8137	10.1073	9.94028	11.7449	12.2023	11.2932	1799.9	1103.06	982.477	3432.16	4712.58	2509.53	0.364684	-1.45528	0.0304732	1.51608
Four and a half LIM domains protein 1	Fhl1;Fhl4	sp|P97447|FHL1_MOUSE Four and a half LIM domains protein 1 OS=Mus musculus OX=10090 GN=Fhl1 PE=1 SV=3;tr|A2AEX8|A2AEX8_MOUSE Four and a half LIM domains protein 1 OS=Mus musculus OX=10090 GN=Fhl1 PE=1 SV=1;tr|A2AEX6|A2AEX6_MOUSE Four and a half LIM domains	12.8078	13.5949	13.3211	13.8544	13.8298	14.0413	7170.21	12372.9	10234.1	14811.2	14560.8	16859.8	0.644087	-0.634673	0.0307276	1.51247
Hepatocyte growth factor-regulated tyrosine kinase substrate	Hgs	sp|Q99LI8|HGS_MOUSE Hepatocyte growth factor-regulated tyrosine kinase substrate OS=Mus musculus OX=10090 GN=Hgs PE=1 SV=2;tr|B1ATY9|B1ATY9_MOUSE Hepatocyte growth factor-regulated tyrosine kinase substrate (Fragment) OS=Mus musculus OX=10090 GN=Hgs PE=1 S	13.748	14.0716	13.6724	14.3844	14.1573	14.4962	13758.2	17217.6	13055.8	21386.3	18271.4	23109.5	0.701506	-0.511473	0.0309382	1.5095
Protocadherin beta 16	Pcdhb16	tr|Q91Y03|Q91Y03_MOUSE Protocadherin beta 16 OS=Mus musculus OX=10090 GN=Pcdhb16 PE=1 SV=1	13.4014	13.5732	13.7784	14.2352	14.3128	14.8266	10819.9	12188.2	14051.1	19285.1	20350.8	29057	0.539491	-0.890328	0.0310525	1.5079
Poly [ADP-ribose] polymerase 12	Parp12	sp|Q8BZ20|PAR12_MOUSE Protein mono-ADP-ribosyltransferase PARP12 OS=Mus musculus OX=10090 GN=Parp12 PE=1 SV=3	12.4176	12.5385	12.6461	13.5058	13.4673	14.1951	5471.04	5949.28	6409.96	11631.9	11325.6	18756.5	0.427442	-1.2262	0.0311006	1.50723
Protocadherin beta 20	Pcdhb20	tr|Q91XZ9|Q91XZ9_MOUSE Protocadherin beta 20 OS=Mus musculus OX=10090 GN=Pcdhb20 PE=1 SV=1	12.394	12.4639	12.5824	13.1091	13.1543	13.6937	5382.27	5649.47	6133.1	8835.52	9116.73	13250	0.550116	-0.862192	0.0316448	1.4997
Cytoskeleton-associated protein 5	Ckap5	sp|A2AGT5|CKAP5_MOUSE Cytoskeleton-associated protein 5 OS=Mus musculus OX=10090 GN=Ckap5 PE=1 SV=1;tr|Z4YL78|Z4YL78_MOUSE Cytoskeleton-associated protein 5 OS=Mus musculus OX=10090 GN=Ckap5 PE=1 SV=1;tr|A0A0R4J0K2|A0A0R4J0K2_MOUSE Cytoskeleton-associated	12.1624	11.8677	11.4482	10.8326	11.152	10.3487	4584.03	3737.09	2794.16	1823.63	2275.55	1303.97	2.05718	1.04067	0.0317672	1.49802
Ras-related protein Rab-8B	Rab8b	sp|P61028|RAB8B_MOUSE Ras-related protein Rab-8B OS=Mus musculus OX=10090 GN=Rab8b PE=1 SV=1	8.4729	9.78222	10.0716	10.3836	10.9864	11.0442	355.302	880.525	1076.1	1335.9	2028.78	2111.72	0.422162	-1.24413	0.0320479	1.4942
60S acidic ribosomal protein P0	Rplp0	sp|P14869|RLA0_MOUSE 60S acidic ribosomal protein P0 OS=Mus musculus OX=10090 GN=Rplp0 PE=1 SV=3;tr|D3YVM5|D3YVM5_MOUSE 60S acidic ribosomal protein P0 (Fragment) OS=Mus musculus OX=10090 GN=Rplp0 PE=1 SV=1;tr|S4R1N1|S4R1N1_MOUSE 60S acidic ribosomal prote	15.9593	15.5118	16.0668	14.9637	14.7694	15.3741	63713	46721.5	68641.8	31953.8	27927.5	42468.3	1.74965	0.807068	0.0321128	1.49332
Protocadherin gamma C3	Pcdhgc3	tr|Q91XX1|Q91XX1_MOUSE Protocadherin gamma C3 OS=Mus musculus OX=10090 GN=Pcdhgc3 PE=1 SV=1	15.5851	16.0157	15.463	16.5103	16.7812	17.3053	49156.7	66253.1	45167.6	93346	112628	161962	0.436427	-1.19619	0.0321185	1.49324
Plexin-B2	Plxnb2	sp|B2RXS4|PLXB2_MOUSE Plexin-B2 OS=Mus musculus OX=10090 GN=Plxnb2 PE=1 SV=1	14.9194	15.1516	15.4565	15.6826	16.0258	15.6898	30987.5	36398.7	44964.5	52593.6	66718.5	52856.7	0.652561	-0.615814	0.0322468	1.49151
Guanine nucleotide-binding protein G(I)/G(S)/G(O) subunit gamma-2	Gng2	sp|P63213|GBG2_MOUSE Guanine nucleotide-binding protein G(I)/G(S)/G(O) subunit gamma-2 OS=Mus musculus OX=10090 GN=Gng2 PE=1 SV=2	10.3582	10.3781	10.2741	11.2681	11.1523	10.6641	1312.59	1330.82	1238.26	2466.24	2276.02	1622.61	0.609858	-0.713455	0.0322736	1.49115
Tyrosine-protein kinase Lyn	Lyn	sp|P25911|LYN_MOUSE Tyrosine-protein kinase Lyn OS=Mus musculus OX=10090 GN=Lyn PE=1 SV=4	11.9027	12.463	12.9978	13.2261	13.7862	13.9677	3828.86	5645.95	8179.52	9581.93	14127.3	16021.3	0.444352	-1.17023	0.0324662	1.48857
Mitotic checkpoint protein BUB3	Bub3	sp|Q9WVA3|BUB3_MOUSE Mitotic checkpoint protein BUB3 OS=Mus musculus OX=10090 GN=Bub3 PE=1 SV=2;tr|A0A140LJ21|A0A140LJ21_MOUSE Mitotic checkpoint protein BUB3 (Fragment) OS=Mus musculus OX=10090 GN=Bub3 PE=1 SV=1;tr|A0A140LHA2|A0A140LHA2_MOUSE Mitotic chec	14.4052	13.8907	13.7786	13.217	13.2267	12.4414	21696.9	15188.6	14053.1	9521.68	9585.91	5562.05	2.06483	1.04602	0.0325929	1.48688
Diphosphoinositol polyphosphate phosphohydrolase 2	Nudt4	sp|Q8R2U6|NUDT4_MOUSE Diphosphoinositol polyphosphate phosphohydrolase 2 OS=Mus musculus OX=10090 GN=Nudt4 PE=1 SV=1	12.8646	12.5254	12.83	13.1757	13.3068	13.0142	7458.14	5895.51	7281.4	9252.96	10133.2	8273.03	0.746047	-0.422662	0.032654	1.48606
Sodium- and chloride-dependent creatine transporter 1;Transporter	Slc6a8	sp|Q8VBW1|SC6A8_MOUSE Sodium- and chloride-dependent creatine transporter 1 OS=Mus musculus OX=10090 GN=Slc6a8 PE=1 SV=1;tr|F6UKB4|F6UKB4_MOUSE Transporter (Fragment) OS=Mus musculus OX=10090 GN=Slc6a8 PE=1 SV=1;tr|E9Q151|E9Q151_MOUSE Transporter OS=Mus mu	12.7673	13.2778	13.7173	14.0925	15.0305	15.0119	6971.73	9931.53	13468.5	17468.9	33468.1	33039.4	0.36167	-1.46725	0.0329774	1.48178
Growth factor receptor-bound protein 2	Grb2	sp|Q60631|GRB2_MOUSE Growth factor receptor-bound protein 2 OS=Mus musculus OX=10090 GN=Grb2 PE=1 SV=1;tr|B1AT92|B1AT92_MOUSE Growth factor receptor-bound protein 2 OS=Mus musculus OX=10090 GN=Grb2 PE=1 SV=1	14.4271	14.8473	15.0532	15.4557	15.6556	16.1155	22028.7	29477	33998.9	44939.6	51618.5	70998.5	0.510303	-0.970574	0.0330351	1.48102
Guanine nucleotide-binding protein G(s) subunit alpha isoforms short;Guanine nucleotide-binding protein G(s) subunit alpha isoforms XLas;Guanine nucleotide-binding protein G(olf) subunit alpha	Gnas;Gnal	sp|P63094|GNAS2_MOUSE Guanine nucleotide-binding protein G(s) subunit alpha isoforms short OS=Mus musculus OX=10090 GN=Gnas PE=1 SV=1;sp|Q6R0H7|GNAS1_MOUSE Guanine nucleotide-binding protein G(s) subunit alpha isoforms XLas OS=Mus musculus OX=10090 GN=Gnas	13.373	13.6846	13.8184	14.3514	14.7002	14.1161	10609	13166.6	14446.2	20902.7	26619.6	17757	0.585512	-0.772228	0.0332652	1.47801
Dynamin-2	Dnm2	sp|P39054|DYN2_MOUSE Dynamin-2 OS=Mus musculus OX=10090 GN=Dnm2 PE=1 SV=2;tr|Q3T9X3|Q3T9X3_MOUSE Dynamin-2 OS=Mus musculus OX=10090 GN=Dnm2 PE=1 SV=1;tr|Q3TCR7|Q3TCR7_MOUSE Dynamin-2 OS=Mus musculus OX=10090 GN=Dnm2 PE=1 SV=1;tr|G3X9G4|G3X9G4_MOUSE Dynamin	15.4775	14.9915	15.0241	15.8473	15.9805	16.4779	45623.8	32575.5	33320	58953.9	64656.2	91273	0.518977	-0.946258	0.0334056	1.47618
Dihydropyrimidinase-related protein 2	Dpysl2	sp|O08553|DPYL2_MOUSE Dihydropyrimidinase-related protein 2 OS=Mus musculus OX=10090 GN=Dpysl2 PE=1 SV=2	17.7396	17.4771	16.8772	16.5211	16.1308	16.1627	218853	182445	120377	94047.4	71755.4	73359.7	2.18125	1.12516	0.0335924	1.47376
Adenosylhomocysteinase	Ahcy	sp|P50247|SAHH_MOUSE Adenosylhomocysteinase OS=Mus musculus OX=10090 GN=Ahcy PE=1 SV=3	16.1684	15.8447	15.0482	14.3762	14.1076	13.9747	73650.1	58847.8	33881.3	21265.1	17652.7	16099.2	3.02414	1.59653	0.0338143	1.4709
Protein XRP2	Rp2	sp|Q9EPK2|XRP2_MOUSE Protein XRP2 OS=Mus musculus OX=10090 GN=Rp2 PE=1 SV=3	12.2679	12.4862	13.0502	13.1861	13.8072	13.678	4931.8	5737.47	8482.07	9319.91	14334.5	13106.5	0.52097	-0.940727	0.0339085	1.46969
Coatomer subunit beta	Copb2	sp|O55029|COPB2_MOUSE Coatomer subunit beta OS=Mus musculus OX=10090 GN=Copb2 PE=1 SV=2	14.8367	14.3175	13.5078	12.3711	11.6954	12.0067	29261.2	20417.2	11648	5297.51	3316.39	4115.07	4.81786	2.26839	0.0339949	1.46859
Reelin	Reln	sp|Q60841|RELN_MOUSE Reelin OS=Mus musculus OX=10090 GN=Reln PE=1 SV=3	12.2999	13.025	12.7004	11.5979	11.8952	11.9023	5042.42	8335.19	6655.82	3099.67	3809.01	3827.8	1.86592	0.899888	0.0341477	1.46664
MLV-related proviral Env polyprotein;Surface protein;Transmembrane protein	N/A	sp|P10404|ENV1_MOUSE MLV-related proviral Env polyprotein OS=Mus musculus OX=10090 PE=1 SV=3	18.4416	18.2001	18.6619	21.0038	20.674	21.9216	356020	301145	414755	2.10268e+06	1.67299e+06	3.97246e+06	0.138346	-2.85365	0.034535	1.46174
Tyrosine-protein kinase Yes	Yes1	sp|Q04736|YES_MOUSE Tyrosine-protein kinase Yes OS=Mus musculus OX=10090 GN=Yes1 PE=1 SV=3	13.2997	13.099	13.6638	13.7555	13.9928	13.8911	10083.4	8773.88	12978.2	13829.9	16302.4	15192.8	0.702381	-0.509674	0.0349346	1.45674
40S ribosomal protein S20	Rps20	sp|P60867|RS20_MOUSE 40S ribosomal protein S20 OS=Mus musculus OX=10090 GN=Rps20 PE=1 SV=1	14.7765	14.7145	13.5893	12.8099	12.5047	12.6814	28065.3	26884.7	12325	7180.66	5811.52	6568.74	3.43926	1.7821	0.0350929	1.45478
F-actin-capping protein subunit beta	Capzb	sp|P47757|CAPZB_MOUSE F-actin-capping protein subunit beta OS=Mus musculus OX=10090 GN=Capzb PE=1 SV=3;tr|F7CAZ6|F7CAZ6_MOUSE F-actin-capping protein subunit beta (Fragment) OS=Mus musculus OX=10090 GN=Capzb PE=1 SV=1;tr|A2AMW0|A2AMW0_MOUSE F-actin-capping	12.7237	12.9672	12.5757	13.4863	13.0779	13.5832	6764.18	8007.85	6104.68	11475.7	8646.5	12273	0.644438	-0.633887	0.0357944	1.44618
Protocadherin gamma A11	Pcdhga11	tr|Q91XY8|Q91XY8_MOUSE Protocadherin gamma A11 OS=Mus musculus OX=10090 GN=Pcdhga11 PE=1 SV=1	12.99	13.1975	13.3908	14.357	13.6818	14.0071	8135.41	9393.84	10740.7	20984	13141.1	16464.8	0.558806	-0.83958	0.0359512	1.44429
40S ribosomal protein S11	Rps11	sp|P62281|RS11_MOUSE 40S ribosomal protein S11 OS=Mus musculus OX=10090 GN=Rps11 PE=1 SV=3;tr|A0A1B0GRR3|A0A1B0GRR3_MOUSE 40S ribosomal protein S11 OS=Mus musculus OX=10090 GN=Rps11 PE=1 SV=1	18.2215	17.5275	16.8267	15.3125	14.6777	14.8241	305646	188931	116236	40693.2	26207.6	29006.7	6.36876	2.67101	0.0361812	1.44152
Lysine-specific histone demethylase 1A	Kdm1a	sp|Q6ZQ88|KDM1A_MOUSE Lysine-specific histone demethylase 1A OS=Mus musculus OX=10090 GN=Kdm1a PE=1 SV=2;tr|A3KG93|A3KG93_MOUSE Lysine-specific histone demethylase OS=Mus musculus OX=10090 GN=Kdm1a PE=1 SV=1;tr|G8JL40|G8JL40_MOUSE Lysine-specific histone d	12.8867	12.3166	11.8637	11.0905	11.0029	10.5922	7573.27	5101.13	3726.74	2180.59	2052.12	1543.72	2.83932	1.50555	0.0361831	1.44149
40S ribosomal protein S28	Rps28	sp|P62858|RS28_MOUSE 40S ribosomal protein S28 OS=Mus musculus OX=10090 GN=Rps28 PE=1 SV=1;tr|G3UYV7|G3UYV7_MOUSE 40S ribosomal protein S28 (Fragment) OS=Mus musculus OX=10090 GN=Rps28 PE=1 SV=1	11.5168	10.741	11.7322	12.048	11.9971	12.2626	2930.23	1711.45	3402.08	4234.57	4087.77	4913.72	0.607715	-0.718533	0.037393	1.42721
Nuclease-sensitive element-binding protein 1;Y-box-binding protein 3;Y-box-binding protein 2	Ybx1;Ybx3;Ybx2	sp|P62960|YBOX1_MOUSE Y-box-binding protein 1 OS=Mus musculus OX=10090 GN=Ybx1 PE=1 SV=3;sp|Q9JKB3|YBOX3_MOUSE Y-box-binding protein 3 OS=Mus musculus OX=10090 GN=Ybx3 PE=1 SV=2;tr|B2RUF0|B2RUF0_MOUSE Y box protein 2 OS=Mus musculus OX=10090 GN=Ybx2 PE=1 S	14.9375	15.6092	15.6087	16.0408	15.8449	16.1289	31378.7	49984.7	49967.4	67415.8	58855.9	71661	0.663513	-0.591804	0.0376304	1.42446
Inorganic pyrophosphatase	Ppa1	sp|Q9D819|IPYR_MOUSE Inorganic pyrophosphatase OS=Mus musculus OX=10090 GN=Ppa1 PE=1 SV=1	13.1492	13.6058	12.8684	12.4996	12.1639	12.2044	9084.55	12466.8	7477.81	5791.01	4588.8	4719.44	1.92255	0.943025	0.0377609	1.42296
Ras-related protein M-Ras	Mras	sp|O08989|RASM_MOUSE Ras-related protein M-Ras OS=Mus musculus OX=10090 GN=Mras PE=1 SV=1;tr|D3Z2V6|D3Z2V6_MOUSE Ras-related protein M-Ras (Fragment) OS=Mus musculus OX=10090 GN=Mras PE=1 SV=1	11.092	11.5983	8.77673	12.4828	11.8606	12.5359	2182.85	3100.53	438.59	5723.97	3718.74	5938.57	0.372009	-1.42659	0.0377613	1.42295
Leucine-rich repeat-containing protein 4B	Lrrc4b	sp|P0C192|LRC4B_MOUSE Leucine-rich repeat-containing protein 4B OS=Mus musculus OX=10090 GN=Lrrc4b PE=1 SV=1;tr|D3YZP3|D3YZP3_MOUSE Leucine-rich repeat-containing protein 4B (Fragment) OS=Mus musculus OX=10090 GN=Lrrc4b PE=1 SV=1;tr|D3Z2D1|D3Z2D1_MOUSE Leu	11.3141	10.0557	11.5793	12.4675	12.1375	13.0382	2546.15	1064.31	3059.97	5663.59	4505.59	8411.81	0.358992	-1.47798	0.0382051	1.41788
Phosphoserine aminotransferase	Psat1	sp|Q99K85|SERC_MOUSE Phosphoserine aminotransferase OS=Mus musculus OX=10090 GN=Psat1 PE=1 SV=1;tr|Q3U6K9|Q3U6K9_MOUSE Phosphoserine aminotransferase OS=Mus musculus OX=10090 GN=Psat1 PE=1 SV=1	16.2655	16.1096	15.3185	14.9296	14.784	14.581	78777.7	70708.7	40862.8	31207.4	28211.6	24508.6	2.26802	1.18143	0.0386355	1.41301
Myosin-9	Myh9	sp|Q8VDD5|MYH9_MOUSE Myosin-9 OS=Mus musculus OX=10090 GN=Myh9 PE=1 SV=4	15.8697	15.1592	15.4566	14.6191	14.7911	14.622	59876.4	36591	44967.7	25164.5	28350.8	25215.1	1.79645	0.845148	0.038653	1.41282
Prolyl endopeptidase	Prep	sp|Q9QUR6|PPCE_MOUSE Prolyl endopeptidase OS=Mus musculus OX=10090 GN=Prep PE=1 SV=1	13.0603	13.2125	12.2637	11.402	11.8968	11.7452	8541.66	9492.02	4917.47	2706.1	3813.24	3432.87	2.30614	1.20548	0.0388644	1.41045
Peroxiredoxin-4	Prdx4	sp|O08807|PRDX4_MOUSE Peroxiredoxin-4 OS=Mus musculus OX=10090 GN=Prdx4 PE=1 SV=1;tr|B1AZS9|B1AZS9_MOUSE Peroxiredoxin-4 (Fragment) OS=Mus musculus OX=10090 GN=Prdx4 PE=1 SV=1	14.1117	14.1729	14.5355	13.7843	13.8627	13.5503	17702.9	18470	23747.7	14108.7	14896.6	11996.3	1.46142	0.547372	0.0391535	1.40723
T-complex protein 1 subunit epsilon	Cct5	sp|P80316|TCPE_MOUSE T-complex protein 1 subunit epsilon OS=Mus musculus OX=10090 GN=Cct5 PE=1 SV=1;tr|E0CZA1|E0CZA1_MOUSE T-complex protein 1 subunit epsilon (Fragment) OS=Mus musculus OX=10090 GN=Cct5 PE=1 SV=1	17.2225	16.8549	16.0349	15.3323	15.2195	14.9735	152929	118531	67140.7	41255.5	38152.8	32171.6	3.0346	1.60151	0.0392143	1.40656
26S proteasome non-ATPase regulatory subunit 11	Psmd11	sp|Q8BG32|PSD11_MOUSE 26S proteasome non-ATPase regulatory subunit 11 OS=Mus musculus OX=10090 GN=Psmd11 PE=1 SV=3;tr|G3UYL8|G3UYL8_MOUSE 26S proteasome non-ATPase regulatory subunit 11 (Fragment) OS=Mus musculus OX=10090 GN=Psmd11 PE=1 SV=1;tr|G3UX15|G3UX	13.7852	13.0814	13.1284	12.497	12.3635	11.8003	14117.5	8667.5	8954.52	5780.59	5269.68	3566.52	2.17145	1.11866	0.0393557	1.40499
FERM, RhoGEF and pleckstrin domain-containing protein 1	Farp1	sp|F8VPU2|FARP1_MOUSE FERM, ARHGEF and pleckstrin domain-containing protein 1 OS=Mus musculus OX=10090 GN=Farp1 PE=1 SV=1	14.4789	14.4134	14.9706	15.0762	15.6894	15.4848	22834.1	21820.6	32107	34545.3	52842.1	45855.3	0.576104	-0.795599	0.0395605	1.40274
von Willebrand factor A domain-containing protein 5A	Vwa5a	sp|Q99KC8|VMA5A_MOUSE von Willebrand factor A domain-containing protein 5A OS=Mus musculus OX=10090 GN=Vwa5a PE=1 SV=2	10.7559	11.7224	10.6375	12.1854	12.108	11.807	1729.21	3379.05	1592.97	4657.69	4414.39	3583.12	0.529523	-0.917234	0.0396254	1.40203
Talin-1	Tln1	sp|P26039|TLN1_MOUSE Talin-1 OS=Mus musculus OX=10090 GN=Tln1 PE=1 SV=2	14.0556	13.8715	14.1295	13.4178	13.7143	13.7765	17027.7	14987.8	17922.7	10943.6	13440.5	14032.7	1.29991	0.378409	0.0403523	1.39413
40S ribosomal protein S3	Rps3	sp|P62908|RS3_MOUSE 40S ribosomal protein S3 OS=Mus musculus OX=10090 GN=Rps3 PE=1 SV=1;tr|D3YV43|D3YV43_MOUSE 40S ribosomal protein S3 OS=Mus musculus OX=10090 GN=Rps3 PE=1 SV=1;tr|A0A140LI77|A0A140LI77_MOUSE 40S ribosomal protein S3 OS=Mus musculus OX=10	18.5845	17.7314	17.3077	15.9896	15.3008	15.3654	393090	217612	162232	65065.3	40364.5	42213	5.23516	2.38823	0.0408984	1.38829
26S proteasome non-ATPase regulatory subunit 2	Psmd2	sp|Q8VDM4|PSMD2_MOUSE 26S proteasome non-ATPase regulatory subunit 2 OS=Mus musculus OX=10090 GN=Psmd2 PE=1 SV=1	13.9417	13.4097	12.6948	10.6875	11.4819	12.0694	15735.1	10882.3	6630.03	1649.14	2860.2	4297.85	3.77504	1.91649	0.0409873	1.38735
Protein deglycase DJ-1	Park7	sp|Q99LX0|PARK7_MOUSE Parkinson disease protein 7 homolog OS=Mus musculus OX=10090 GN=Park7 PE=1 SV=1;tr|A2A817|A2A817_MOUSE Parkinson disease protein 7 homolog (Fragment) OS=Mus musculus OX=10090 GN=Park7 PE=1 SV=1;tr|A2A816|A2A816_MOUSE Parkinson disease	11.1194	11.5505	11.6765	10.853	10.9102	10.903	2224.71	2999.49	3273.23	1849.6	1924.41	1914.83	1.4937	0.578891	0.0410106	1.3871
Alcohol dehydrogenase [NADP(+)]	Akr1a1	sp|Q9JII6|AK1A1_MOUSE Aldo-keto reductase family 1 member A1 OS=Mus musculus OX=10090 GN=Akr1a1 PE=1 SV=3;tr|B1AXW3|B1AXW3_MOUSE Aldo-keto reductase family 1 member A1 (Fragment) OS=Mus musculus OX=10090 GN=Akr1a1 PE=1 SV=8	13.1964	13.1149	13.0401	12.9649	12.5673	12.4429	9386.68	8871.12	8422.89	7995.1	6069.24	5567.83	1.35903	0.442577	0.0410531	1.38665
Epsin-2	Epn2	sp|Q8CHU3|EPN2_MOUSE Epsin-2 OS=Mus musculus OX=10090 GN=Epn2 PE=1 SV=1;tr|Q5NCM5|Q5NCM5_MOUSE Epsin-2 OS=Mus musculus OX=10090 GN=Epn2 PE=1 SV=1;tr|Q5NCM6|Q5NCM6_MOUSE Epsin-2 OS=Mus musculus OX=10090 GN=Epn2 PE=1 SV=1;tr|J3QNT7|J3QNT7_MOUSE Epsin-2 OS=Mu	14.0572	13.8573	13.7628	14.4278	14.1657	14.1906	17046.6	14841	13900	22039.4	18378.1	18698	0.774545	-0.36858	0.0412173	1.38492
2,3-cyclic-nucleotide 3-phosphodiesterase	Cnp	sp|P16330|CN37_MOUSE 2,3-cyclic-nucleotide 3-phosphodiesterase OS=Mus musculus OX=10090 GN=Cnp PE=1 SV=3	13.1399	13.8424	13.2483	13.9031	14.3124	14.4688	9026.18	14688.5	9730.51	15319.7	20345.2	22674.8	0.573284	-0.802678	0.0417502	1.37934
FERM domain-containing protein 7	Frmd7	sp|A2AD83|FRMD7_MOUSE FERM domain-containing protein 7 OS=Mus musculus OX=10090 GN=Frmd7 PE=1 SV=1	12.9019	14.1112	13.6775	15.3282	15.0906	16.1864	7653.48	17696.8	13102	41138.5	34891.8	74574.8	0.255319	-1.96963	0.0418138	1.37868
Protein FAM49A	Fam49a	sp|Q8BHZ0|CYRIA_MOUSE CYFIP-related Rac1 interactor A OS=Mus musculus OX=10090 GN=Cyria PE=1 SV=1	12.9841	13.1201	13.3922	12.808	12.7332	12.7184	8102.21	8903.15	10751.1	7171.21	6808.87	6739.38	1.33963	0.421839	0.0420519	1.37621
Endophilin-A1	Sh3gl2	sp|Q62420|SH3G2_MOUSE Endophilin-A1 OS=Mus musculus OX=10090 GN=Sh3gl2 PE=1 SV=2;tr|Q8BXU5|Q8BXU5_MOUSE Endophilin-A1 OS=Mus musculus OX=10090 GN=Sh3gl2 PE=1 SV=1;tr|A2ALV3|A2ALV3_MOUSE Endophilin-A1 OS=Mus musculus OX=10090 GN=Sh3gl2 PE=1 SV=1;tr|F6ZL13|F	13.6395	14.1769	13.685	14.4938	14.495	15.0423	12761.4	18521.3	13170.3	23071.1	23090.3	33743	0.556328	-0.845993	0.042078	1.37595
Splicing factor, proline- and glutamine-rich	Sfpq	sp|Q8VIJ6|SFPQ_MOUSE Splicing factor, proline- and glutamine-rich OS=Mus musculus OX=10090 GN=Sfpq PE=1 SV=1	14.0463	13.2781	12.7827	11.6289	11.2035	11.2022	16918.3	9933.59	7046.54	3167	2358.25	2356.12	4.30109	2.1047	0.0420974	1.37574
MICAL-like protein 1	Micall1	sp|Q8BGT6|MILK1_MOUSE MICAL-like protein 1 OS=Mus musculus OX=10090 GN=Micall1 PE=1 SV=3	10.4179	10.8301	10.93	11.2583	11.2461	11.7086	1368.05	1820.48	1951	2449.55	2428.92	3346.88	0.62484	-0.678442	0.0425728	1.37087
Ubiquitin thioesterase OTUB1	Otub1	sp|Q7TQI3|OTUB1_MOUSE Ubiquitin thioesterase OTUB1 OS=Mus musculus OX=10090 GN=Otub1 PE=1 SV=2;tr|D3Z7K0|D3Z7K0_MOUSE Ubiquitin thioesterase OTUB1 (Fragment) OS=Mus musculus OX=10090 GN=Otub1 PE=1 SV=1;tr|D3YWF6|D3YWF6_MOUSE Ubiquitin thioesterase OTUB1 OS	12.1666	11.4558	11.8565	11.2674	10.7974	10.9547	4597.39	2808.92	3708.19	2465.05	1779.68	1984.69	1.7842	0.835274	0.0425996	1.37059
Eukaryotic translation initiation factor 2 subunit 3, X-linked;Eukaryotic translation initiation factor 2 subunit 3, Y-linked	Eif2s3x;Eif2s3y	sp|Q9Z0N1|IF2G_MOUSE Eukaryotic translation initiation factor 2 subunit 3, X-linked OS=Mus musculus OX=10090 GN=Eif2s3x PE=1 SV=2;tr|A2AAW9|A2AAW9_MOUSE Eukaryotic translation initiation factor 2 subunit 3, X-linked OS=Mus musculus OX=10090 GN=Eif2s3x PE=1	15.7224	14.9857	14.7362	14.0497	13.4905	13.4848	54064.7	32444.8	27292.2	16958.3	11509.2	11463.8	2.84994	1.51093	0.0427822	1.36874
Protein patched homolog 1	Ptch1	sp|Q61115|PTC1_MOUSE Protein patched homolog 1 OS=Mus musculus OX=10090 GN=Ptch1 PE=1 SV=1;tr|A0A0A6YWC4|A0A0A6YWC4_MOUSE Protein patched homolog 1 OS=Mus musculus OX=10090 GN=Ptch1 PE=1 SV=1	11.1705	10.9404	11.1555	12.4473	11.7723	11.7958	2304.92	1965.12	2281.08	5584.84	3497.96	3555.41	0.518358	-0.94798	0.0432543	1.36397
Peroxiredoxin-1	Prdx1	sp|P35700|PRDX1_MOUSE Peroxiredoxin-1 OS=Mus musculus OX=10090 GN=Prdx1 PE=1 SV=1;tr|B1AXW5|B1AXW5_MOUSE Peroxiredoxin-1 (Fragment) OS=Mus musculus OX=10090 GN=Prdx1 PE=1 SV=8;tr|B1AXW6|B1AXW6_MOUSE Peroxiredoxin-1 (Fragment) OS=Mus musculus OX=10090 GN=Pr	16.7333	17.0059	17.0532	16.6563	16.1991	15.7441	108949	131609	135996	103287	75234.1	54884.1	1.61331	0.69002	0.0432632	1.36388
Tubulin beta-5 chain	Tubb5	sp|P99024|TBB5_MOUSE Tubulin beta-5 chain OS=Mus musculus OX=10090 GN=Tubb5 PE=1 SV=1	17.4097	17.3376	15.938	15.1648	14.379	14.8204	174117	165629	62779.2	36733.3	21306.4	28932.4	4.62822	2.21046	0.0433696	1.36281
Farnesyl pyrophosphate synthase	Fdps	sp|Q920E5|FPPS_MOUSE Farnesyl pyrophosphate synthase OS=Mus musculus OX=10090 GN=Fdps PE=1 SV=1;tr|A0A0G2JDJ5|A0A0G2JDJ5_MOUSE Farnesyl pyrophosphate synthase (Fragment) OS=Mus musculus OX=10090 GN=Fdps PE=4 SV=1;tr|A0A0G2JEB3|A0A0G2JEB3_MOUSE Farnesyl pyr	12.299	12.4372	12.6357	12.1991	12.0897	11.8834	5039.27	5545.88	6363.92	4702.13	4358.75	3777.98	1.32014	0.400688	0.0436753	1.35976
Rabankyrin-5	Ankfy1	sp|Q810B6|ANFY1_MOUSE Rabankyrin-5 OS=Mus musculus OX=10090 GN=Ankfy1 PE=1 SV=2	12.4022	11.8941	11.9499	11.625	11.3517	10.8675	5412.95	3806.11	3956.2	3158.45	2613.38	1868.29	1.72449	0.786166	0.0437426	1.3591
Splicing factor 3B subunit 3	Sf3b3	sp|Q921M3|SF3B3_MOUSE Splicing factor 3B subunit 3 OS=Mus musculus OX=10090 GN=Sf3b3 PE=1 SV=1	14.9998	14.6901	15.0698	15.4147	15.2393	15.6862	32763.5	26433.9	34392.3	43680.4	38680	52725	0.692818	-0.529451	0.0442177	1.3544
Serine/threonine-protein kinase TAO1	Taok1	sp|Q5F2E8|TAOK1_MOUSE Serine/threonine-protein kinase TAO1 OS=Mus musculus OX=10090 GN=Taok1 PE=1 SV=1	15.9006	15.2598	15.0756	14.4949	14.3546	14.204	61172.7	39233.5	34530.9	23088.7	20949.1	18872.5	2.14491	1.10092	0.0444382	1.35224
Transmembrane protein 150A	Tmem150a	sp|Q91WN2|T150A_MOUSE Transmembrane protein 150A OS=Mus musculus OX=10090 GN=Tmem150a PE=2 SV=1;tr|A0A0U1RQ67|A0A0U1RQ67_MOUSE Transmembrane protein 150A (Fragment) OS=Mus musculus OX=10090 GN=Tmem150a PE=1 SV=1;tr|A0A0U1RNR4|A0A0U1RNR4_MOUSE Transmembrane	10.0358	10.9125	11.1715	11.6267	11.3892	11.4758	1049.73	1927.48	2306.52	3162.17	2682.2	2848.13	0.607849	-0.718216	0.0461398	1.33592
Syntenin-1	Sdcbp	sp|O08992|SDCB1_MOUSE Syntenin-1 OS=Mus musculus OX=10090 GN=Sdcbp PE=1 SV=1;tr|Q3TMX0|Q3TMX0_MOUSE Syntenin-1 OS=Mus musculus OX=10090 GN=Sdcbp PE=1 SV=1;tr|H3BLG5|H3BLG5_MOUSE Syntenin-1 (Fragment) OS=Mus musculus OX=10090 GN=Sdcbp PE=1 SV=1;tr|A2AKJ9|A2	17.1903	18.3941	17.4106	18.9326	19.0727	19.8729	149553	344489	174226	500358	551385	960150	0.332159	-1.59005	0.0470242	1.32768
Septin-9	SEPT9	sp|Q80UG5|SEPT9_MOUSE Septin-9 OS=Mus musculus OX=10090 GN=Septin9 PE=1 SV=1;tr|A8Y5D3|A8Y5D3_MOUSE Septin-9 (Fragment) OS=Mus musculus OX=10090 GN=Septin9 PE=1 SV=1;tr|A2A6U5|A2A6U5_MOUSE Septin-9 (Fragment) OS=Mus musculus OX=10090 GN=Septin9 PE=1 SV=1;t	13.5995	12.9248	11.9856	10.19	10.5454	10.0287	12412.4	7775.93	4055.32	1168.14	1494.45	1044.57	6.53968	2.70922	0.047465	1.32363
Alpha-enolase	Eno1	sp|P17182|ENOA_MOUSE Alpha-enolase OS=Mus musculus OX=10090 GN=Eno1 PE=1 SV=3;tr|Q6PHC1|Q6PHC1_MOUSE Alpha-enolase OS=Mus musculus OX=10090 GN=Eno1 PE=1 SV=1	19.9007	19.7828	18.8999	18.6886	18.3027	18.1635	978831	902020	489144	422502	323342	293602	2.28006	1.18907	0.0475593	1.32276
Acidic leucine-rich nuclear phosphoprotein 32 family member E	Anp32e	sp|P97822|AN32E_MOUSE Acidic leucine-rich nuclear phosphoprotein 32 family member E OS=Mus musculus OX=10090 GN=Anp32e PE=1 SV=2;tr|E9Q5H2|E9Q5H2_MOUSE Acidic leucine-rich nuclear phosphoprotein 32 family member E (Fragment) OS=Mus musculus OX=10090 GN=Anp	11.7561	10.9412	10.8514	9.72392	10.2431	8.5617	3458.91	1966.21	1847.55	845.652	1211.94	377.858	2.98617	1.5783	0.0478594	1.32003
S-adenosylmethionine synthase isoform type-2	Mat2a	sp|Q3THS6|METK2_MOUSE S-adenosylmethionine synthase isoform type-2 OS=Mus musculus OX=10090 GN=Mat2a PE=1 SV=2;tr|A0A0U1RNT6|A0A0U1RNT6_MOUSE S-adenosylmethionine synthase OS=Mus musculus OX=10090 GN=Mat2a PE=1 SV=1;tr|A0A0U1RNK6|A0A0U1RNK6_MOUSE S-adenosy	14.4799	13.87	13.5477	13.1153	12.7555	12.3334	22849.9	14972.2	11974.7	8873.58	6914.94	5160.88	2.377	1.24914	0.0480645	1.31818
CUE domain-containing protein 1	Cuedc1	sp|Q8R3V6|CUED1_MOUSE CUE domain-containing protein 1 OS=Mus musculus OX=10090 GN=Cuedc1 PE=2 SV=2;tr|F2Z3X3|F2Z3X3_MOUSE CUE domain-containing protein 1 OS=Mus musculus OX=10090 GN=Cuedc1 PE=1 SV=1	9.00129	9.74097	10.8684	11.4455	11.3445	10.9146	512.458	855.705	1869.45	2788.94	2600.37	1930.29	0.442322	-1.17683	0.048126	1.31762
Rab GDP dissociation inhibitor beta	Gdi2	sp|Q61598|GDIB_MOUSE Rab GDP dissociation inhibitor beta OS=Mus musculus OX=10090 GN=Gdi2 PE=1 SV=1;tr|A0A1Y7VLG4|A0A1Y7VLG4_MOUSE Rab GDP dissociation inhibitor (Fragment) OS=Mus musculus OX=10090 GN=Gdi2 PE=1 SV=1;tr|A0A1Y7VL99|A0A1Y7VL99_MOUSE Rab GDP d	15.0653	15.8028	15.5028	16.0021	15.9327	16.0141	34285.2	57163.2	46431	65631.5	62549	66179.6	0.709402	-0.495325	0.0484089	1.31508
Quinone oxidoreductase	Cryz	sp|P47199|QOR_MOUSE Quinone oxidoreductase OS=Mus musculus OX=10090 GN=Cryz PE=1 SV=1;tr|A0A0A6YXR4|A0A0A6YXR4_MOUSE Quinone oxidoreductase (Fragment) OS=Mus musculus OX=10090 GN=Cryz PE=1 SV=5;tr|D3YUG9|D3YUG9_MOUSE Quinone oxidoreductase (Fragment) OS=Mu	12.8167	13.2009	12.2829	11.7085	11.8923	11.8353	7214.58	9416.01	4983.35	3346.65	3801.36	3654.1	2.0009	1.00065	0.048755	1.31198
Ras GTPase-activating-like protein IQGAP1	Iqgap1	sp|Q9JKF1|IQGA1_MOUSE Ras GTPase-activating-like protein IQGAP1 OS=Mus musculus OX=10090 GN=Iqgap1 PE=1 SV=2	11.0246	11.4986	11.7761	11.9106	12.0771	12.3714	2083.22	2893.5	3507.19	3849.89	4320.85	5298.62	0.629868	-0.666879	0.048779	1.31177
Elongation factor 1-gamma	Eef1g	sp|Q9D8N0|EF1G_MOUSE Elongation factor 1-gamma OS=Mus musculus OX=10090 GN=Eef1g PE=1 SV=3	17.1959	16.5441	15.8825	14.9996	14.584	14.8185	150135	95558.7	60410	32758.9	24559.6	28894.4	3.55056	1.82804	0.0489856	1.30993
PAB-dependent poly(A)-specific ribonuclease subunit PAN2	Pan2	sp|Q8BGF7|PAN2_MOUSE PAN2-PAN3 deadenylation complex catalytic subunit Pan2 OS=Mus musculus OX=10090 GN=Pan2 PE=1 SV=1	11.7822	11.5905	11.1205	11.9266	12.3749	12.6215	3522.05	3083.81	2226.4	3892.82	5311.49	6301.59	0.569607	-0.811961	0.0490534	1.30933
Pre-mRNA-processing factor 19	Prpf19	sp|Q99KP6|PRP19_MOUSE Pre-mRNA-processing factor 19 OS=Mus musculus OX=10090 GN=Prpf19 PE=1 SV=1	15.6717	14.9951	14.4461	13.6214	13.5679	12.9661	52197.8	32656.9	22320.8	12602.3	12143.5	8001.75	3.27277	1.71051	0.0491422	1.30855
Synaptosomal-associated protein 23;Synaptosomal-associated protein	Snap23	sp|O09044|SNP23_MOUSE Synaptosomal-associated protein 23 OS=Mus musculus OX=10090 GN=Snap23 PE=1 SV=1;tr|E9Q8A1|E9Q8A1_MOUSE Synaptosomal-associated protein 23 OS=Mus musculus OX=10090 GN=Snap23 PE=1 SV=1;tr|B0R030|B0R030_MOUSE Synaptosomal-associated prot	11.8657	11.6279	12.1293	12.1637	12.6053	12.4853	3731.91	3164.8	4480.05	4588.16	6231.22	5733.9	0.687282	-0.541026	0.0491697	1.3083
Phosphoribosyl pyrophosphate synthase-associated protein 1;Phosphoribosyl pyrophosphate synthase-associated protein 2	Prpsap1;Prpsap2	sp|Q9D0M1|KPRA_MOUSE Phosphoribosyl pyrophosphate synthase-associated protein 1 OS=Mus musculus OX=10090 GN=Prpsap1 PE=1 SV=1;sp|Q8R574|KPRB_MOUSE Phosphoribosyl pyrophosphate synthase-associated protein 2 OS=Mus musculus OX=10090 GN=Prpsap2 PE=1 SV=1;tr|B	14.6003	13.8355	13.7018	13.2453	12.3659	12.2152	24838.7	14618.4	13324.6	9710.3	5278.45	4754.9	2.67335	1.41865	0.0499957	1.30107
T-complex protein 1 subunit zeta	Cct6a	sp|P80317|TCPZ_MOUSE T-complex protein 1 subunit zeta OS=Mus musculus OX=10090 GN=Cct6a PE=1 SV=3;tr|A0A571BEL9|A0A571BEL9_MOUSE T-complex protein 1 subunit zeta OS=Mus musculus OX=10090 GN=Cct6a PE=1 SV=1	17.468	16.5161	16.3943	15.1438	15.169	15.0503	181298	93722	86134.3	36202.5	36840.4	33930.6	3.37611	1.75536	0.0501473	1.29975
Leucine-rich repeat-containing protein 57	Lrrc57	sp|Q9D1G5|LRC57_MOUSE Leucine-rich repeat-containing protein 57 OS=Mus musculus OX=10090 GN=Lrrc57 PE=1 SV=1;tr|A2AKH7|A2AKH7_MOUSE Leucine-rich repeat-containing protein 57 (Fragment) OS=Mus musculus OX=10090 GN=Lrrc57 PE=1 SV=8;tr|Q8JZX5|Q8JZX5_MOUSE Leu	14.062	13.671	14.3375	14.8006	14.6987	14.3814	17103.5	13043.1	20702.3	28538.1	26591.9	21341.9	0.664935	-0.588715	0.050374	1.29779
Zinc finger protein 61	Zfp61	tr|Q923D1|Q923D1_MOUSE Zinc finger protein 61 OS=Mus musculus OX=10090 GN=Zfp61 PE=2 SV=1	15.1771	15.8052	15.8537	16.4856	16.4716	17.2323	37047.8	57258.4	59216	91761.4	90875.3	153971	0.456086	-1.13262	0.0504807	1.29687
Coatomer subunit beta	Copb1	sp|Q9JIF7|COPB_MOUSE Coatomer subunit beta OS=Mus musculus OX=10090 GN=Copb1 PE=1 SV=1	12.6895	11.3354	11.9963	8.42589	10.7336	9.90325	6605.72	2584.02	4085.51	343.911	1702.69	957.581	4.41892	2.14369	0.050487	1.29682
Exportin-2	Cse1l	sp|Q9ERK4|XPO2_MOUSE Exportin-2 OS=Mus musculus OX=10090 GN=Cse1l PE=1 SV=1;tr|F6ZEW4|F6ZEW4_MOUSE Exportin-2 (Fragment) OS=Mus musculus OX=10090 GN=Cse1l PE=1 SV=1;tr|E9Q1T9|E9Q1T9_MOUSE Exportin-2 OS=Mus musculus OX=10090 GN=Cse1l PE=1 SV=1;tr|E9QAX7|E9Q	13.0024	12.7357	11.8014	11.6796	9.88032	10.6314	8205.64	6820.68	3569.24	3280.27	942.481	1586.25	3.20116	1.6786	0.0505307	1.29644
Kin of IRRE-like protein 1	Kirrel	sp|Q80W68|KIRR1_MOUSE Kin of IRRE-like protein 1 OS=Mus musculus OX=10090 GN=Kirrel1 PE=1 SV=1	13.067	13.065	13.7217	13.7554	13.9689	14.1832	8581.42	8569.53	13509.6	13828.9	16034.6	18602.4	0.632622	-0.660585	0.0505907	1.29593
Caldesmon 1	Cald1	tr|E9QA15|E9QA15_MOUSE Caldesmon 1 OS=Mus musculus OX=10090 GN=Cald1 PE=1 SV=1;tr|Q8VCQ8|Q8VCQ8_MOUSE Caldesmon 1 OS=Mus musculus OX=10090 GN=Cald1 PE=1 SV=1;tr|E9Q0M9|E9Q0M9_MOUSE Caldesmon 1 OS=Mus musculus OX=10090 GN=Cald1 PE=1 SV=1;tr|E9QA16|E9QA16_MO	11.379	11.6659	12.2372	13.0023	12.5721	12.3831	2663.3	3249.27	4827.97	8205.07	6089.47	5341.76	0.546974	-0.870457	0.0507735	1.29436
Axin interactor, dorsalization-associated protein	Aida	sp|Q8C4Q6|AIDA_MOUSE Axin interactor, dorsalization-associated protein OS=Mus musculus OX=10090 GN=Aida PE=1 SV=1	13.1633	12.7399	13.4161	13.5949	13.8261	13.54	9173.78	6840.57	10930.7	12372.9	14523.5	11910.9	0.694328	-0.52631	0.050809	1.29406
Transaldolase	Taldo1	sp|Q93092|TALDO_MOUSE Transaldolase OS=Mus musculus OX=10090 GN=Taldo1 PE=1 SV=2;tr|A0A1B0GR11|A0A1B0GR11_MOUSE Transaldolase OS=Mus musculus OX=10090 GN=Taldo1 PE=1 SV=1	13.7635	13.2536	13.3806	12.9859	12.1539	12.9172	13906.8	9766.32	10665	8112.33	4557.1	7735.08	1.68287	0.750924	0.0513703	1.28929
ADP-ribosylation factor 6	Arf6	sp|P62331|ARF6_MOUSE ADP-ribosylation factor 6 OS=Mus musculus OX=10090 GN=Arf6 PE=1 SV=2	8.85272	9.33203	9.42922	9.62047	10.3455	10.4899	462.311	644.497	689.411	787.136	1301.09	1438.05	0.509382	-0.973181	0.051541	1.28785
Tubulin alpha-1B chain;Tubulin alpha-1A chain;Tubulin alpha-1C chain;Tubulin alpha-3 chain;Tubulin alpha-4A chain	Tuba1b;Tuba1a;Tuba1c;Tuba3a;Tuba4a	sp|P05213|TBA1B_MOUSE Tubulin alpha-1B chain OS=Mus musculus OX=10090 GN=Tuba1b PE=1 SV=2;sp|P68369|TBA1A_MOUSE Tubulin alpha-1A chain OS=Mus musculus OX=10090 GN=Tuba1a PE=1 SV=1;sp|P68373|TBA1C_MOUSE Tubulin alpha-1C chain OS=Mus musculus OX=10090 GN=Tub	19.0643	18.6989	17.4253	16.6139	16.1311	16.2064	548184	425530	176010	100296	71770.3	75615.8	4.64194	2.21473	0.052072	1.2834
Ephrin type-B receptor 3;Ephrin type-B receptor 4;Receptor protein-tyrosine kinase	Ephb3;Ephb4	sp|P54754|EPHB3_MOUSE Ephrin type-B receptor 3 OS=Mus musculus OX=10090 GN=Ephb3 PE=1 SV=2;tr|E0CYA3|E0CYA3_MOUSE Ephrin type-B receptor 3 OS=Mus musculus OX=10090 GN=Ephb3 PE=1 SV=2;sp|P54761|EPHB4_MOUSE Ephrin type-B receptor 4 OS=Mus musculus OX=10090 G	15.0448	15.6814	15.7401	15.8687	16.1671	16.1887	33801.5	52549.9	54732.1	59834.9	73583.8	74693.8	0.67792	-0.560814	0.0524264	1.28045
Zinc finger CCCH-type antiviral protein 1	Zc3hav1	sp|Q3UPF5|ZCCHV_MOUSE Zinc finger CCCH-type antiviral protein 1 OS=Mus musculus OX=10090 GN=Zc3hav1 PE=1 SV=1;tr|G3X9X5|G3X9X5_MOUSE Zinc finger CCCH-type antiviral protein 1 OS=Mus musculus OX=10090 GN=Zc3hav1 PE=1 SV=1;tr|D3Z5I1|D3Z5I1_MOUSE Zinc finger	10.6035	11.4706	11.6938	11.8357	12.0932	12.1166	1555.86	2837.88	3312.72	3655.11	4369.34	4440.79	0.618236	-0.693769	0.0525768	1.27921
Epidermal growth factor receptor kinase substrate 8	Eps8	sp|Q08509|EPS8_MOUSE Epidermal growth factor receptor kinase substrate 8 OS=Mus musculus OX=10090 GN=Eps8 PE=1 SV=2;tr|D3Z7F4|D3Z7F4_MOUSE Epidermal growth factor receptor kinase substrate 8 (Fragment) OS=Mus musculus OX=10090 GN=Eps8 PE=1 SV=1;tr|D3Z5I5|D	10.5255	11.2438	10.1819	11.3165	12.1947	11.8701	1473.98	2425.05	1161.6	2550.39	4687.82	3743.31	0.460832	-1.11769	0.0530286	1.27549
Valine--tRNA ligase	Vars	sp|Q9Z1Q9|SYVC_MOUSE Valine--tRNA ligase OS=Mus musculus OX=10090 GN=Vars1 PE=1 SV=1;tr|G3UY93|G3UY93_MOUSE Valyl-tRNA synthetase (Fragment) OS=Mus musculus OX=10090 GN=Vars PE=1 SV=1	16.5022	15.5658	15.5547	14.1891	14.5609	14.5896	92823.3	48503.5	48131.7	18678.6	24169.5	24655.1	2.80666	1.48885	0.0531204	1.27474
Alpha-centractin;Beta-centractin	Actr1a;Actr1b	sp|P61164|ACTZ_MOUSE Alpha-centractin OS=Mus musculus OX=10090 GN=Actr1a PE=1 SV=1;tr|A0A494BB86|A0A494BB86_MOUSE Alpha-centractin OS=Mus musculus OX=10090 GN=Actr1a PE=1 SV=1;sp|Q8R5C5|ACTY_MOUSE Beta-centractin OS=Mus musculus OX=10090 GN=Actr1b PE=1 SV=	14.1157	13.8087	13.3497	13.1493	12.7724	13.0584	17752.1	14349.4	10439	9085.18	6996.41	8530.41	1.72844	0.789474	0.0533997	1.27246
Glutaredoxin-3	Glrx3	sp|Q9CQM9|GLRX3_MOUSE Glutaredoxin-3 OS=Mus musculus OX=10090 GN=Glrx3 PE=1 SV=1;tr|A0A1B0GS58|A0A1B0GS58_MOUSE Glutaredoxin-3 OS=Mus musculus OX=10090 GN=Glrx3 PE=1 SV=1	12.2681	13.3152	12.7571	11.6703	11.0848	11.8408	4932.49	10192.4	6922.61	3259.2	2171.99	3668.06	2.423	1.27679	0.053945	1.26805
Syntaxin-1B	Stx1b	sp|P61264|STX1B_MOUSE Syntaxin-1B OS=Mus musculus OX=10090 GN=Stx1b PE=1 SV=1	10.6401	11.2586	11.3169	11.9886	11.4802	11.74	1595.84	2450.06	2551.09	4063.76	2856.83	3420.52	0.637938	-0.648511	0.0539892	1.26769
60S ribosomal protein L13	Rpl13	sp|P47963|RL13_MOUSE 60S ribosomal protein L13 OS=Mus musculus OX=10090 GN=Rpl13 PE=1 SV=3	16.0534	14.9827	16.1848	14.6985	14.427	14.1778	68007.2	32377.4	74492.1	26588.2	22027.2	18532.9	2.60433	1.38091	0.0540744	1.26701
Asparagine synthetase [glutamine-hydrolyzing]	Asns	sp|Q61024|ASNS_MOUSE Asparagine synthetase [glutamine-hydrolyzing] OS=Mus musculus OX=10090 GN=Asns PE=1 SV=3	15.0465	14.479	14.1245	13.7229	13.5633	13.2172	33841.4	22835.6	17860.7	13520.9	12104.9	9523	2.12064	1.0845	0.0541411	1.26647
Nucleophosmin	Npm1	sp|Q61937|NPM_MOUSE Nucleophosmin OS=Mus musculus OX=10090 GN=Npm1 PE=1 SV=1;tr|Q9DAY9|Q9DAY9_MOUSE Nucleophosmin OS=Mus musculus OX=10090 GN=Npm1 PE=1 SV=1;tr|Q5SQB0|Q5SQB0_MOUSE Nucleophosmin OS=Mus musculus OX=10090 GN=Npm1 PE=1 SV=1;tr|Q5SQB5|Q5SQB5_MO	13.9114	13.9504	14.9181	12.6785	12.9276	12.6191	15408.1	15830.3	30959.6	6555.54	7791.04	6291.11	3.0138	1.59159	0.0542381	1.2657
D-3-phosphoglycerate dehydrogenase	Phgdh	sp|Q61753|SERA_MOUSE D-3-phosphoglycerate dehydrogenase OS=Mus musculus OX=10090 GN=Phgdh PE=1 SV=3	18.4011	17.7134	17.5268	17.0037	16.8685	16.5535	346165	214914	188839	131409	119653	96183.4	2.15962	1.11078	0.0542703	1.26544
Aldose reductase-related protein 2;Aldose reductase-related protein 1	Akr1b10;Akr1b8;Akr1b7	tr|D3Z494|D3Z494_MOUSE Aldo-keto reductase family 1, member B10 (aldose reductase) OS=Mus musculus OX=10090 GN=Akr1b10 PE=1 SV=1;tr|G5E895|G5E895_MOUSE Aldo-keto reductase family 1, member B10 (aldose reductase) OS=Mus musculus OX=10090 GN=Akr1b10 PE=1 SV=	13.6894	13.0252	12.7408	11.7593	11.8912	12.3129	13210.5	8336.35	6844.83	3466.59	3798.46	5088.06	2.29835	1.2006	0.0544526	1.26398
Glycolipid transfer protein	Gltp	sp|Q9JL62|GLTP_MOUSE Glycolipid transfer protein OS=Mus musculus OX=10090 GN=Gltp PE=1 SV=3;tr|D3Z1H9|D3Z1H9_MOUSE Glycolipid transfer protein OS=Mus musculus OX=10090 GN=Gltp PE=1 SV=1	9.42116	9.22492	9.08599	9.58872	10.4274	10.5008	685.57	598.381	543.445	770.003	1377.08	1448.96	0.508168	-0.976622	0.0547397	1.2617
Coatomer subunit alpha;Xenin;Proxenin;Coatomer subunit alpha	Copa	sp|Q8CIE6|COPA_MOUSE Coatomer subunit alpha OS=Mus musculus OX=10090 GN=Copa PE=1 SV=2;tr|F8WHL2|F8WHL2_MOUSE Coatomer subunit alpha OS=Mus musculus OX=10090 GN=Copa PE=1 SV=1	17.0724	16.2651	15.5561	14.2876	13.9723	14.0126	137818	78755.9	48178.4	19998.4	16072.4	16527.7	5.03344	2.33154	0.05494	1.26011
Integrin beta-6;Integrin beta	Itgb6	sp|Q9Z0T9|ITB6_MOUSE Integrin beta-6 OS=Mus musculus OX=10090 GN=Itgb6 PE=1 SV=1;tr|B1AYG7|B1AYG7_MOUSE Integrin beta (Fragment) OS=Mus musculus OX=10090 GN=Itgb6 PE=1 SV=1;tr|B1AYG6|B1AYG6_MOUSE Integrin beta OS=Mus musculus OX=10090 GN=Itgb6 PE=1 SV=1	14.4721	15.1086	15.7744	16.4049	16.2925	15.77	22726.7	35329.8	56049	86769.5	80265.9	55878.3	0.511882	-0.966117	0.0550672	1.25911
Ubiquitin-associated and SH3 domain-containing protein B	Ubash3b	sp|Q8BGG7|UBS3B_MOUSE Ubiquitin-associated and SH3 domain-containing protein B OS=Mus musculus OX=10090 GN=Ubash3b PE=1 SV=1	10.4875	11.2276	10.5436	11.4847	11.2178	11.5645	1435.66	2397.97	1492.59	2865.76	2381.74	3028.74	0.643557	-0.635861	0.055392	1.25655
AP-2 complex subunit beta;AP complex subunit beta	Ap2b1	sp|Q9DBG3|AP2B1_MOUSE AP-2 complex subunit beta OS=Mus musculus OX=10090 GN=Ap2b1 PE=1 SV=1;tr|H3BKM0|H3BKM0_MOUSE AP complex subunit beta OS=Mus musculus OX=10090 GN=Ap2b1 PE=1 SV=1;tr|H3BIY9|H3BIY9_MOUSE AP complex subunit beta OS=Mus musculus OX=10090 G	15.3194	15.4883	15.5417	15.3203	15.1961	15.1421	40888.3	45966.7	47699.9	40913.8	37538.9	36159.8	1.174	0.23143	0.0554667	1.25597
Transmembrane protein 237	Tmem237	sp|Q3V0J1|TM237_MOUSE Transmembrane protein 237 OS=Mus musculus OX=10090 GN=Tmem237 PE=1 SV=1;tr|A0A087WQC2|A0A087WQC2_MOUSE Transmembrane protein 237 (Fragment) OS=Mus musculus OX=10090 GN=Tmem237 PE=1 SV=1	9.7329	11.0498	10.162	11.7471	11.6582	11.0074	850.932	2119.93	1145.69	3437.4	3231.97	2058.53	0.471654	-1.0842	0.0558199	1.25321
Serine--tRNA ligase, cytoplasmic	Sars	sp|P26638|SYSC_MOUSE Serine--tRNA ligase, cytoplasmic OS=Mus musculus OX=10090 GN=Sars1 PE=1 SV=3;tr|Q8C483|Q8C483_MOUSE Seryl-aminoacyl-tRNA synthetase OS=Mus musculus OX=10090 GN=Sars PE=1 SV=1;tr|A2AFS1|A2AFS1_MOUSE Seryl-aminoacyl-tRNA synthetase (Frag	15.0647	14.5706	14.13	13.8726	13.1491	13.5505	34271	24332.6	17928.9	14999.2	9083.92	11997.9	2.12112	1.08483	0.0558513	1.25297
Bifunctional glutamate/proline--tRNA ligase;Glutamate--tRNA ligase;Proline--tRNA ligase	Eprs	sp|Q8CGC7|SYEP_MOUSE Bifunctional glutamate/proline--tRNA ligase OS=Mus musculus OX=10090 GN=Eprs1 PE=1 SV=4	14.8281	14.0201	13.3811	11.4398	12.4379	12.0263	29087.3	16613.9	10668.7	2777.94	5548.57	4171.35	4.51036	2.17324	0.0560505	1.25142
Hepatocyte cell adhesion molecule	Hepacam	sp|Q640R3|HECAM_MOUSE Hepatocyte cell adhesion molecule OS=Mus musculus OX=10090 GN=Hepacam PE=1 SV=2	11.959	12.4899	13.192	13.3007	14.0246	13.5842	3981.23	5752.21	9358.1	10090.4	16665.8	12281.5	0.489054	-1.03193	0.0562863	1.2496
T-complex protein 1 subunit delta	Cct4	sp|P80315|TCPD_MOUSE T-complex protein 1 subunit delta OS=Mus musculus OX=10090 GN=Cct4 PE=1 SV=3;tr|G5E839|G5E839_MOUSE T-complex protein 1 subunit delta OS=Mus musculus OX=10090 GN=Cct4 PE=1 SV=1	17.3441	16.5238	16.5547	16.0602	15.531	15.3422	166377	94223.5	96263.4	68328.5	47347.5	41539.6	2.2699	1.18263	0.0567451	1.24607
T-complex protein 1 subunit eta	Cct7	sp|P80313|TCPH_MOUSE T-complex protein 1 subunit eta OS=Mus musculus OX=10090 GN=Cct7 PE=1 SV=1;tr|A0A0N4SV00|A0A0N4SV00_MOUSE T-complex protein 1 subunit eta OS=Mus musculus OX=10090 GN=Cct7 PE=1 SV=1	16.7928	16.0087	15.6255	14.8111	14.6463	14.5776	113537	65932.4	50552.7	28746.5	25643.4	24450.9	2.91755	1.54476	0.0568599	1.24519
ATP-binding cassette sub-family G member 2	Abcg2	sp|Q7TMS5|ABCG2_MOUSE Broad substrate specificity ATP-binding cassette transporter ABCG2 OS=Mus musculus OX=10090 GN=Abcg2 PE=1 SV=1;tr|S4R2E1|S4R2E1_MOUSE Broad substrate-specificity ATP-binding cassette transporter ABCG2 OS=Mus musculus OX=10090 GN=Abcg2	13.2216	13.5524	14.1918	14.2074	14.9913	14.7285	9552.09	12013.8	18713.6	18917.1	32571	27146.9	0.512233	-0.965127	0.0568843	1.24501
Moesin	Msn	sp|P26041|MOES_MOUSE Moesin OS=Mus musculus OX=10090 GN=Msn PE=1 SV=3	15.4246	15.795	16.109	16.3567	16.6404	16.1834	43981.2	56855	70679.3	83918.4	102155	74419.9	0.658426	-0.602907	0.0572231	1.24243
Phosphatidylethanolamine-binding protein 1;Hippocampal cholinergic neurostimulating peptide	Pebp1	sp|P70296|PEBP1_MOUSE Phosphatidylethanolamine-binding protein 1 OS=Mus musculus OX=10090 GN=Pebp1 PE=1 SV=3;tr|D6RHS6|D6RHS6_MOUSE Phosphatidylethanolamine-binding protein 1 OS=Mus musculus OX=10090 GN=Pebp1 PE=1 SV=1;tr|D3Z1V4|D3Z1V4_MOUSE Phosphatidylet	9.56076	10.1209	9.61541	10.458	10.524	10.0859	755.224	1113.51	784.381	1406.6	1472.45	1086.82	0.668986	-0.579951	0.0573105	1.24177
Ras-related protein Rab-12	Rab12	sp|P35283|RAB12_MOUSE Ras-related protein Rab-12 OS=Mus musculus OX=10090 GN=Rab12 PE=1 SV=3;tr|A2CG35|A2CG35_MOUSE Ras-related protein Rab-12 OS=Mus musculus OX=10090 GN=Rab12 PE=1 SV=1	12.0685	11.1567	12.0899	12.6185	12.4762	12.3031	4295.17	2282.98	4359.36	6288.5	5697.84	5053.61	0.641874	-0.639638	0.057334	1.24159
Serine protease 23	Prss23	sp|Q9D6X6|PRS23_MOUSE Serine protease 23 OS=Mus musculus OX=10090 GN=Prss23 PE=2 SV=2	15.5835	15.4886	14.0435	13.707	12.8349	13.0896	49102.2	45976.2	16885.5	13372.7	7306.17	8716.9	3.80885	1.92935	0.0575018	1.24032
Guanine nucleotide-binding protein G(I)/G(S)/G(T) subunit beta-2	Gnb2	sp|P62880|GBB2_MOUSE Guanine nucleotide-binding protein G(I)/G(S)/G(T) subunit beta-2 OS=Mus musculus OX=10090 GN=Gnb2 PE=1 SV=3;tr|D3Z1M1|D3Z1M1_MOUSE Guanine nucleotide-binding protein G(I)/G(S)/G(T) subunit beta-2 (Fragment) OS=Mus musculus OX=10090 GN=	15.2343	15.4473	15.5337	15.7714	15.9866	15.6096	38546.2	44678.7	47436.2	55932.5	64930.1	49998.6	0.76472	-0.386996	0.0575149	1.24022
Lethal(2) giant larvae protein homolog 1	Llgl1	sp|Q80Y17|L2GL1_MOUSE Lethal(2) giant larvae protein homolog 1 OS=Mus musculus OX=10090 GN=Llgl1 PE=1 SV=1;tr|A0A0R4J0S4|A0A0R4J0S4_MOUSE Lethal(2) giant larvae protein homolog 1 OS=Mus musculus OX=10090 GN=Llgl1 PE=1 SV=1	14.0766	14.2248	13.866	14.393	14.2537	14.3615	17277.4	19146.6	14930.8	21514.2	19534	21049.5	0.827	-0.274042	0.0577949	1.23811
Serine/threonine-protein phosphatase 2A 65 kDa regulatory subunit A alpha isoform	Ppp2r1a	sp|Q76MZ3|2AAA_MOUSE Serine/threonine-protein phosphatase 2A 65 kDa regulatory subunit A alpha isoform OS=Mus musculus OX=10090 GN=Ppp2r1a PE=1 SV=3;tr|G3UWL2|G3UWL2_MOUSE Serine/threonine-protein phosphatase 2A 65 kDa regulatory subunit A alpha isoform (F	15.284	14.5885	14.3987	13.5921	13.9588	13.5522	39897.2	24636.3	21599.3	12348.9	15922.7	12012.1	2.13815	1.09637	0.0578276	1.23786
Long-chain-fatty-acid--CoA ligase ACSBG1	Acsbg1	sp|Q99PU5|ACBG1_MOUSE Long-chain-fatty-acid--CoA ligase ACSBG1 OS=Mus musculus OX=10090 GN=Acsbg1 PE=1 SV=1;tr|D3Z1Z2|D3Z1Z2_MOUSE Long-chain-fatty-acid--CoA ligase ACSBG1 (Fragment) OS=Mus musculus OX=10090 GN=Acsbg1 PE=1 SV=1;tr|D3Z2G8|D3Z2G8_MOUSE Long-	13.3177	12.9502	12.5823	13.4359	13.4132	13.5348	10210	7914.05	6132.67	11081.8	10908.8	11868.1	0.716413	-0.481137	0.0581265	1.23563
Catenin delta-2	Ctnnd2	sp|O35927|CTND2_MOUSE Catenin delta-2 OS=Mus musculus OX=10090 GN=Ctnnd2 PE=1 SV=1;tr|B7ZNF6|B7ZNF6_MOUSE Catenin delta-2 OS=Mus musculus OX=10090 GN=Ctnnd2 PE=1 SV=1;tr|E9QKH8|E9QKH8_MOUSE Catenin delta-2 OS=Mus musculus OX=10090 GN=Ctnnd2 PE=1 SV=1	11.4163	11.8352	11.7643	12.9716	12.2169	12.379	2733.06	3653.85	3478.62	8032.31	4760.51	5326.6	0.544472	-0.87707	0.0585191	1.2327
PDZ domain-containing protein GIPC1	Gipc1	sp|Q9Z0G0|GIPC1_MOUSE PDZ domain-containing protein GIPC1 OS=Mus musculus OX=10090 GN=Gipc1 PE=1 SV=1	12.56	12.6921	13.2263	13.3253	13.9836	13.5592	6038.61	6617.63	9583.25	10264	16198.8	12070.5	0.57715	-0.792981	0.0586651	1.23162
Dip2c protein	Dip2c	tr|B2RQ71|B2RQ71_MOUSE Dip2c protein OS=Mus musculus OX=10090 GN=Dip2c PE=1 SV=1;tr|E9PWR4|E9PWR4_MOUSE Disco-interacting protein 2 homolog C OS=Mus musculus OX=10090 GN=Dip2c PE=1 SV=1	14.4026	14.4897	14.5791	14.712	15.2027	14.8968	21657.8	23005.6	24476.3	26838.2	37711.1	30505.9	0.727365	-0.459248	0.0587298	1.23114
Sequestosome-1	Sqstm1	sp|Q64337|SQSTM_MOUSE Sequestosome-1 OS=Mus musculus OX=10090 GN=Sqstm1 PE=1 SV=1;tr|D3YZJ1|D3YZJ1_MOUSE Sequestosome-1 OS=Mus musculus OX=10090 GN=Sqstm1 PE=1 SV=1	12.3291	11.8002	12.2998	13.0167	12.6423	12.5427	5145.52	3566.27	5042.07	8287.38	6393.1	5966.63	0.66614	-0.586104	0.0587661	1.23087
40S ribosomal protein S27	Rps27	sp|Q6ZWU9|RS27_MOUSE 40S ribosomal protein S27 OS=Mus musculus OX=10090 GN=Rps27 PE=1 SV=3;tr|A0A0G2JDW7|A0A0G2JDW7_MOUSE 40S ribosomal protein S27 (Fragment) OS=Mus musculus OX=10090 GN=Rps27 PE=1 SV=1;tr|A0A0G2JG29|A0A0G2JG29_MOUSE 40S ribosomal protein	13.3676	13.7432	12.3554	11.8151	11.8339	11.416	10569.4	13712.5	5240.18	3603.29	3650.55	2732.49	2.95624	1.56376	0.0591393	1.22812
Pyruvate kinase PKM	Pkm	sp|P52480|KPYM_MOUSE Pyruvate kinase PKM OS=Mus musculus OX=10090 GN=Pkm PE=1 SV=4;tr|A0A1L1SU37|A0A1L1SU37_MOUSE Pyruvate kinase PKM (Fragment) OS=Mus musculus OX=10090 GN=Pkm PE=1 SV=1	20.4538	19.8679	18.8556	18.0769	17.7713	17.5098	1.43617e+06	956828	474352	276496	223715	186627	4.17472	2.06168	0.0596507	1.22438
Ras-related protein Rab-11A;Ras-related protein Rab-11B	Rab11a;Rab11b	sp|P62492|RB11A_MOUSE Ras-related protein Rab-11A OS=Mus musculus OX=10090 GN=Rab11a PE=1 SV=3;sp|P46638|RB11B_MOUSE Ras-related protein Rab-11B OS=Mus musculus OX=10090 GN=Rab11b PE=1 SV=3;tr|G3UY29|G3UY29_MOUSE Ras-related protein Rab-11B OS=Mus musculus	14.9837	15.1345	14.9327	15.1617	15.4079	15.2416	32399.9	35969.8	31274.5	36654.4	43475	38741.7	0.838254	-0.254541	0.0600237	1.22168
Cytoplasmic dynein 1 light intermediate chain 1	Dync1li1	sp|Q8R1Q8|DC1L1_MOUSE Cytoplasmic dynein 1 light intermediate chain 1 OS=Mus musculus OX=10090 GN=Dync1li1 PE=1 SV=1	15.1085	14.3413	14.1117	13.5229	13.3035	13.1496	35327.4	20756.9	17702.9	11770.6	10110	9087.07	2.38271	1.25261	0.0601689	1.22063
GTP-binding nuclear protein Ran;GTP-binding nuclear protein Ran, testis-specific isoform	Ran;1700009N14Rik;Rasl2-9	sp|P62827|RAN_MOUSE GTP-binding nuclear protein Ran OS=Mus musculus OX=10090 GN=Ran PE=1 SV=3;tr|Q14AA6|Q14AA6_MOUSE GTP-binding nuclear protein Ran OS=Mus musculus OX=10090 GN=1700009N14Rik PE=2 SV=1;sp|Q61820|RANT_MOUSE GTP-binding nuclear protein Ran, t	18.6048	18.1645	17.0226	16.4115	16.0196	16.0571	398660	293805	133141	87167.3	66432.4	68181.8	3.72261	1.89632	0.0602232	1.22024
Neuronal proto-oncogene tyrosine-protein kinase Src	Src	sp|P05480|SRC_MOUSE Neuronal proto-oncogene tyrosine-protein kinase Src OS=Mus musculus OX=10090 GN=Src PE=1 SV=4;tr|F8WI90|F8WI90_MOUSE Tyrosine-protein kinase OS=Mus musculus OX=10090 GN=Src PE=1 SV=1	14.3654	13.4845	14.006	14.4055	14.6164	14.6963	21106.5	11461.4	16452.3	21701.4	25117.4	26547.7	0.668155	-0.581745	0.0607192	1.21667
UDP-glucuronic acid decarboxylase 1	Uxs1	sp|Q91XL3|UXS1_MOUSE UDP-glucuronic acid decarboxylase 1 OS=Mus musculus OX=10090 GN=Uxs1 PE=1 SV=1;tr|G5E8H4|G5E8H4_MOUSE UDP-glucuronic acid decarboxylase 1 OS=Mus musculus OX=10090 GN=Uxs1 PE=4 SV=1;tr|D3Z411|D3Z411_MOUSE UDP-glucuronic acid decarboxyla	13.8527	12.9388	12.6736	10.43	11.596	11.9508	14793.7	7851.76	6533.32	1379.57	3095.59	3958.67	3.45974	1.79066	0.0608109	1.21602
Ataxin-2	Atxn2	sp|O70305|ATX2_MOUSE Ataxin-2 OS=Mus musculus OX=10090 GN=Atxn2 PE=1 SV=1;tr|E9QM77|E9QM77_MOUSE Ataxin-2 OS=Mus musculus OX=10090 GN=Atxn2 PE=1 SV=1;tr|A0A286YDU2|A0A286YDU2_MOUSE Ataxin-2 (Fragment) OS=Mus musculus OX=10090 GN=Atxn2 PE=1 SV=1;tr|F6U2C2|F	12.4765	11.2926	12.5387	13.4583	12.7447	13.1437	5699.03	2508.48	5950.11	11255.2	6863.36	9049.99	0.521104	-0.940357	0.0615838	1.21053
Importin-7	Ipo7	sp|Q9EPL8|IPO7_MOUSE Importin-7 OS=Mus musculus OX=10090 GN=Ipo7 PE=1 SV=2	11.9081	10.5332	11.947	12.9466	12.7438	12.13	3843.22	1481.87	3948.26	7894.32	6859.08	4482.23	0.482092	-1.05262	0.0619257	1.20813
Cyclin-dependent kinase inhibitor 2A	Cdkn2a	sp|P51480|CDN2A_MOUSE Cyclin-dependent kinase inhibitor 2A OS=Mus musculus OX=10090 GN=Cdkn2a PE=1 SV=2	11.2768	9.71932	11.2949	11.7653	11.7031	11.6847	2481.16	842.96	2512.49	3481.03	3334.14	3291.89	0.577478	-0.792162	0.0621151	1.2068
Vacuolar protein sorting-associated protein 35	Vps35	sp|Q9EQH3|VPS35_MOUSE Vacuolar protein sorting-associated protein 35 OS=Mus musculus OX=10090 GN=Vps35 PE=1 SV=1	15.9597	15.4039	14.8233	14.4735	13.9559	14.1815	63730.7	43354.7	28990.6	22748.8	15890.8	18580.5	2.37812	1.24982	0.0627433	1.20243
Elongation factor 1-alpha 1;Elongation factor 1-alpha 2	Eef1a1;Eef1a2	sp|P10126|EF1A1_MOUSE Elongation factor 1-alpha 1 OS=Mus musculus OX=10090 GN=Eef1a1 PE=1 SV=3;sp|P62631|EF1A2_MOUSE Elongation factor 1-alpha 2 OS=Mus musculus OX=10090 GN=Eef1a2 PE=1 SV=1;tr|D3YZ68|D3YZ68_MOUSE Elongation factor 1-alpha 1 (Fragment) OS=M	19.8726	20.1208	19.3044	20.5407	20.7283	21.4515	959950	1.14016e+06	647446	1.52534e+06	1.73716e+06	2.86777e+06	0.448194	-1.15781	0.0627866	1.20213
Fatty acid synthase;[Acyl-carrier-protein] S-acetyltransferase;[Acyl-carrier-protein] S-malonyltransferase;3-oxoacyl-[acyl-carrier-protein] synthase;3-oxoacyl-[acyl-carrier-protein] reductase;3-hydroxyacyl-[acyl-carrier-protein] dehydratase;Enoyl-[acyl-carrier-protein] reductase;Oleoyl-[acyl-carrier-protein] hydrolase	Fasn	sp|P19096|FAS_MOUSE Fatty acid synthase OS=Mus musculus OX=10090 GN=Fasn PE=1 SV=2;tr|A0A0U1RNJ1|A0A0U1RNJ1_MOUSE Fatty acid synthase OS=Mus musculus OX=10090 GN=Fasn PE=1 SV=1	19.4719	18.7974	18.1838	17.663	17.2272	17.2254	727153	455597	297762	207536	153428	153236	2.87926	1.5257	0.0638143	1.19508
40S ribosomal protein S12	Rps12	sp|P63323|RS12_MOUSE 40S ribosomal protein S12 OS=Mus musculus OX=10090 GN=Rps12 PE=1 SV=2;tr|Q6ZWZ6|Q6ZWZ6_MOUSE 40S ribosomal protein S12 OS=Mus musculus OX=10090 GN=Rps12 PE=1 SV=1;tr|F7AEH4|F7AEH4_MOUSE 40S ribosomal protein S12 OS=Mus musculus OX=1009	12.5294	13.2214	12.7741	12.3047	11.2692	12.1955	5911.87	9550.76	7004.66	5059.22	2468.13	4690.42	1.8389	0.878846	0.0643525	1.19143
T-complex protein 1 subunit alpha	Tcp1	sp|P11983|TCPA_MOUSE T-complex protein 1 subunit alpha OS=Mus musculus OX=10090 GN=Tcp1 PE=1 SV=3	18.4065	17.5473	17.21	16.325	16.222	16.2434	347463	191542	151609	82094.6	76437.9	77580.2	2.92494	1.5484	0.0643596	1.19139
C-1-tetrahydrofolate synthase, cytoplasmic;Methylenetetrahydrofolate dehydrogenase;Methenyltetrahydrofolate cyclohydrolase;Formyltetrahydrofolate synthetase;C-1-tetrahydrofolate synthase, cytoplasmic, N-terminally processed	Mthfd1	sp|Q922D8|C1TC_MOUSE C-1-tetrahydrofolate synthase, cytoplasmic OS=Mus musculus OX=10090 GN=Mthfd1 PE=1 SV=4;tr|A0A1W2P733|A0A1W2P733_MOUSE C-1-tetrahydrofolate synthase, cytoplasmic OS=Mus musculus OX=10090 GN=Mthfd1 PE=1 SV=1	15.6133	14.8495	14.7737	14.2774	14.0858	13.9077	50127	29521.9	28010.9	19857.5	17387.9	15368.6	2.04622	1.03296	0.0646232	1.18961
Cordon-bleu protein-like 1 (Fragment)	Cobll1	tr|B1AZ26|B1AZ26_MOUSE Cordon-bleu protein-like 1 (Fragment) OS=Mus musculus OX=10090 GN=Cobll1 PE=1 SV=8	10.2682	10.4064	10.6788	10.7051	11.3166	11.4768	1233.21	1357.18	1639.23	1669.38	2550.56	2850.11	0.598244	-0.741194	0.0646357	1.18953
Hsc70-interacting protein	St13	sp|Q99L47|F10A1_MOUSE Hsc70-interacting protein OS=Mus musculus OX=10090 GN=St13 PE=1 SV=1;tr|F8WJK8|F8WJK8_MOUSE Hsc70-interacting protein OS=Mus musculus OX=10090 GN=St13 PE=1 SV=1;tr|E9Q1V0|E9Q1V0_MOUSE Hsc70-interacting protein (Fragment) OS=Mus muscul	14.0576	15.0749	14.5776	15.1294	15.2854	15.2894	17051.4	34514.1	24450.9	35842.9	39935.9	40046.8	0.6563	-0.607572	0.064706	1.18906
Annexin A2;Annexin	Anxa2	sp|P07356|ANXA2_MOUSE Annexin A2 OS=Mus musculus OX=10090 GN=Anxa2 PE=1 SV=2;tr|B0V2N8|B0V2N8_MOUSE Annexin (Fragment) OS=Mus musculus OX=10090 GN=Anxa2 PE=1 SV=1;tr|B0V2N7|B0V2N7_MOUSE Annexin (Fragment) OS=Mus musculus OX=10090 GN=Anxa2 PE=1 SV=1;tr|B0V2	13.6502	14.4972	15.1404	15.2956	15.5139	15.2589	12856.4	23125.5	36117.2	40219.3	46789.6	39209.1	0.571228	-0.807862	0.0648382	1.18817
Citrate synthase, mitochondrial;Citrate synthase	Cs;Csl	sp|Q9CZU6|CISY_MOUSE Citrate synthase, mitochondrial OS=Mus musculus OX=10090 GN=Cs PE=1 SV=1;tr|Q80X68|Q80X68_MOUSE Citrate synthase OS=Mus musculus OX=10090 GN=Csl PE=1 SV=1	15.9152	15.1519	14.3466	13.2418	12.9802	13.3778	61794.9	36406.3	20833.2	9686.77	8080.34	10644.3	4.18966	2.06683	0.0649691	1.18729
Glyceraldehyde-3-phosphate dehydrogenase	Gm3839	tr|S4R1W1|S4R1W1_MOUSE Glyceraldehyde-3-phosphate dehydrogenase OS=Mus musculus OX=10090 GN=Gm3839 PE=1 SV=1	11.6857	11.8719	10.5598	10.3334	10.1262	9.81276	3294.17	3747.99	1509.44	1290.22	1117.61	899.363	2.58576	1.37059	0.065057	1.18671
Bifunctional purine biosynthesis protein PURH;Phosphoribosylaminoimidazolecarboxamide formyltransferase;IMP cyclohydrolase	Atic	sp|Q9CWJ9|PUR9_MOUSE Bifunctional purine biosynthesis protein ATIC OS=Mus musculus OX=10090 GN=Atic PE=1 SV=2	13.2118	12.7888	12.0703	10.8044	10.9854	12.0551	9487.42	7076.4	4300.53	1788.33	2027.38	4255.46	2.58505	1.37019	0.0653321	1.18487
Filamin-A-interacting protein 1	Filip1	sp|Q9CS72|FLIP1_MOUSE Filamin-A-interacting protein 1 OS=Mus musculus OX=10090 GN=Filip1 PE=1 SV=2;tr|A0A5F8MPD6|A0A5F8MPD6_MOUSE Filamin-A-interacting protein 1 OS=Mus musculus OX=10090 GN=Filip1 PE=1 SV=1;tr|Q059P4|Q059P4_MOUSE Filamin-A-interacting prot	17.7236	18.0818	18.0951	19.576	20.1095	21.1181	216439	277437	280006	781562	1.13126e+06	2.27605e+06	0.184747	-2.43638	0.0653855	1.18452
Ras-related protein Rab-7a	Rab7a	sp|P51150|RAB7A_MOUSE Ras-related protein Rab-7a OS=Mus musculus OX=10090 GN=Rab7a PE=1 SV=2	16.1656	16.3339	15.9942	16.3473	16.4355	16.5434	73507.3	82602.6	65273.1	83373.4	88629.5	95512.4	0.827553	-0.273077	0.0657417	1.18216
V-type proton ATPase subunit B, brain isoform	Atp6v1b2	sp|P62814|VATB2_MOUSE V-type proton ATPase subunit B, brain isoform OS=Mus musculus OX=10090 GN=Atp6v1b2 PE=1 SV=1	12.7184	12.9466	12.8783	12.6878	12.3956	11.9795	6739.38	7894.32	7529.3	6597.94	5388.25	4038.21	1.38308	0.467883	0.0658118	1.1817
Raftlin-2	Rftn2	sp|Q8CHX7|RFTN2_MOUSE Raftlin-2 OS=Mus musculus OX=10090 GN=Rftn2 PE=1 SV=3	12.527	12.8918	13.4909	13.5821	14.2808	13.7917	5902.05	7600.09	11512.4	12263.6	19904.4	14181.3	0.539696	-0.889782	0.0660456	1.18016
Metastasis-associated protein MTA2	Mta2	sp|Q9R190|MTA2_MOUSE Metastasis-associated protein MTA2 OS=Mus musculus OX=10090 GN=Mta2 PE=1 SV=1	13.9137	13.4421	12.9651	12.4817	12.5615	12.6622	15432.7	11129.5	7996.21	5719.61	6044.89	6481.9	1.89398	0.921424	0.0661045	1.17977
CTP synthase 1	Ctps1	sp|P70698|PYRG1_MOUSE CTP synthase 1 OS=Mus musculus OX=10090 GN=Ctps1 PE=1 SV=2	12.3793	11.4563	11.268	10.635	10.3285	9.13462	5327.71	2809.89	2466.07	1590.21	1285.84	562.075	3.08414	1.62487	0.0661678	1.17935
Serine/threonine-protein kinase TAO1	Taok1	sp|Q5F2E8|TAOK1_MOUSE Serine/threonine-protein kinase TAO1 OS=Mus musculus OX=10090 GN=Taok1 PE=1 SV=1	14.8342	15.5414	15.0474	15.6327	15.7204	15.5832	29210.5	47690	33862.5	50805.6	53989.8	49092	0.719767	-0.474399	0.0662106	1.17907
GDP-L-fucose synthase	Tsta3	sp|P23591|FCL_MOUSE GDP-L-fucose synthase OS=Mus musculus OX=10090 GN=Tsta3 PE=1 SV=3;tr|A0A2R8VKL9|A0A2R8VKL9_MOUSE GDP-L-fucose synthase OS=Mus musculus OX=10090 GN=Tsta3 PE=1 SV=1;tr|A0A2R8W6P6|A0A2R8W6P6_MOUSE GDP-L-fucose synthase OS=Mus musculus OX=1	12.6626	12.1611	11.7101	10.546	11.365	11.4386	6483.69	4579.9	3350.36	1495.07	2637.58	2775.63	2.08647	1.06107	0.0662273	1.17896
Isocitrate dehydrogenase [NADP] cytoplasmic	Idh1;Idh2	sp|O88844|IDHC_MOUSE Isocitrate dehydrogenase [NADP] cytoplasmic OS=Mus musculus OX=10090 GN=Idh1 PE=1 SV=2;tr|D3YVY3|D3YVY3_MOUSE Isocitrate dehydrogenase [NADP] cytoplasmic (Fragment) OS=Mus musculus OX=10090 GN=Idh1 PE=1 SV=1;tr|A0A0U1RP68|A0A0U1RP68_MO	13.7763	13.1706	12.8527	12.3482	12.4774	12.2114	14030.7	9220.31	7396.87	5214.09	5702.58	4742.39	1.9572	0.968789	0.0667205	1.17574
Proliferating cell nuclear antigen	Pcna	sp|P17918|PCNA_MOUSE Proliferating cell nuclear antigen OS=Mus musculus OX=10090 GN=Pcna PE=1 SV=2	15.1814	14.4721	14.2812	13.7187	13.3571	13.8415	37158.4	22726.7	19909.9	13481.6	10492.7	14679.3	2.06436	1.04569	0.0667627	1.17547
Basic leucine zipper and W2 domain-containing protein 1	Bzw1	sp|Q9CQC6|BZW1_MOUSE Basic leucine zipper and W2 domain-containing protein 1 OS=Mus musculus OX=10090 GN=Bzw1 PE=1 SV=1;tr|A0A087WPF9|A0A087WPF9_MOUSE Basic leucine zipper and W2 domain-containing protein 1 (Fragment) OS=Mus musculus OX=10090 GN=Bzw1 PE=1	14.4973	14.0613	13.9541	13.8225	13.5748	13.3353	23127.2	17095.2	15870.9	14487.3	12201.7	10335.4	1.51504	0.599351	0.0668609	1.17483
Transketolase	Tkt	sp|P40142|TKT_MOUSE Transketolase OS=Mus musculus OX=10090 GN=Tkt PE=1 SV=1;tr|A0A286YE28|A0A286YE28_MOUSE Transketolase (Fragment) OS=Mus musculus OX=10090 GN=Tkt PE=1 SV=1	16.2914	16.8352	15.8111	15.3579	15.3847	15.2962	80204.7	116923	57493.1	41994.1	42781.5	40236	2.03678	1.02629	0.0672749	1.17215
Glycogen phosphorylase, brain form	Pygb	sp|Q8CI94|PYGB_MOUSE Glycogen phosphorylase, brain form OS=Mus musculus OX=10090 GN=Pygb PE=1 SV=3	16.2093	15.9135	15.0342	14.8065	14.6142	14.5739	75767.9	61722.1	33554.1	28655	25079.1	24388.3	2.18944	1.13056	0.0680961	1.16688
T-complex protein 1 subunit gamma	Cct3	sp|P80318|TCPG_MOUSE T-complex protein 1 subunit gamma OS=Mus musculus OX=10090 GN=Cct3 PE=1 SV=1;tr|E9Q133|E9Q133_MOUSE T-complex protein 1 subunit gamma OS=Mus musculus OX=10090 GN=Cct3 PE=1 SV=1;tr|Q3U0I3|Q3U0I3_MOUSE T-complex protein 1 subunit gamma O	16.6817	16.0021	15.5512	14.9503	14.9417	14.8728	105122	65631.5	48015.1	31658.4	31470.2	30002.6	2.34903	1.23207	0.0682644	1.16581
Macrophage migration inhibitory factor	Mif	sp|P34884|MIF_MOUSE Macrophage migration inhibitory factor OS=Mus musculus OX=10090 GN=Mif PE=1 SV=2	15.2816	15.5549	14.0985	13.9677	13.4359	13.0846	39830.9	48138.4	17541.7	16021.3	11081.8	8686.75	2.94808	1.55977	0.0685086	1.16426
Magnesium-dependent phosphatase 1	Mdp1	sp|Q9D967|MGDP1_MOUSE Magnesium-dependent phosphatase 1 OS=Mus musculus OX=10090 GN=Mdp1 PE=1 SV=1	9.13843	8.67033	9.60844	10.2308	11.3725	10.4259	563.562	407.408	780.6	1201.65	2651.33	1375.65	0.334996	-1.57778	0.0690997	1.16052
Basigin	Bsg	sp|P18572|BASI_MOUSE Basigin OS=Mus musculus OX=10090 GN=Bsg PE=1 SV=2;tr|K3W4Q8|K3W4Q8_MOUSE Basigin OS=Mus musculus OX=10090 GN=Bsg PE=1 SV=1;tr|J3QP71|J3QP71_MOUSE Basigin (Fragment) OS=Mus musculus OX=10090 GN=Bsg PE=1 SV=1	13.8924	14.9476	15.1412	15.2685	16.1772	15.7976	15206.5	31599.2	36137.3	39470.9	74100.7	56957.6	0.486386	-1.03983	0.0693644	1.15886
Insulin-like growth factor-binding protein 2	Igfbp2	sp|P47877|IBP2_MOUSE Insulin-like growth factor-binding protein 2 OS=Mus musculus OX=10090 GN=Igfbp2 PE=2 SV=2;tr|D3YU40|D3YU40_MOUSE Insulin-like growth factor-binding protein 2 OS=Mus musculus OX=10090 GN=Igfbp2 PE=1 SV=1	14.2847	14.8711	15.4721	15.4312	15.9238	16.1991	19958.3	29967.3	45453.4	44182.9	62164.4	75234.1	0.525268	-0.928874	0.06941	1.15858
U5 small nuclear ribonucleoprotein 200 kDa helicase	Snrnp200	sp|Q6P4T2|U520_MOUSE U5 small nuclear ribonucleoprotein 200 kDa helicase OS=Mus musculus OX=10090 GN=Snrnp200 PE=1 SV=1	16.5654	15.9358	15.1736	14.6849	14.2301	14.4119	96980	62683.6	36958	26338.8	19217.1	21797.9	2.91924	1.54559	0.0696267	1.15722
Ubiquitin-conjugating enzyme E2 D3;Ubiquitin-conjugating enzyme E2 D2B;Ubiquitin-conjugating enzyme E2 D2	Ube2d3;Ube2d2b;Ube2d2	sp|P61079|UB2D3_MOUSE Ubiquitin-conjugating enzyme E2 D3 OS=Mus musculus OX=10090 GN=Ube2d3 PE=1 SV=1;sp|Q6ZWY6|U2D2B_MOUSE Ubiquitin-conjugating enzyme E2 D2B OS=Mus musculus OX=10090 GN=Ube2d2b PE=1 SV=1;sp|P62838|UB2D2_MOUSE Ubiquitin-conjugating enzyme	9.91219	10.0739	9.40622	10.213	10.4248	10.8481	963.533	1077.82	678.507	1186.91	1374.6	1843.33	0.617469	-0.695561	0.0698133	1.15606
Myotrophin	Mtpn	sp|P62774|MTPN_MOUSE Myotrophin OS=Mus musculus OX=10090 GN=Mtpn PE=1 SV=2	13.6483	13.4238	13.5367	14.3062	13.8285	13.8715	12839.5	10989.2	11883.7	20257.9	14547.7	14987.8	0.717212	-0.479528	0.0699515	1.1552
Protein disulfide-isomerase A3	Pdia3	sp|P27773|PDIA3_MOUSE Protein disulfide-isomerase A3 OS=Mus musculus OX=10090 GN=Pdia3 PE=1 SV=2	9.92681	9.98916	10.2449	10.2445	10.947	10.9955	973.347	1016.33	1213.45	1213.11	1974.13	2041.62	0.612587	-0.707014	0.0705255	1.15165
SUMO-activating enzyme subunit 1;SUMO-activating enzyme subunit 1, N-terminally processed	Sae1	sp|Q9R1T2|SAE1_MOUSE SUMO-activating enzyme subunit 1 OS=Mus musculus OX=10090 GN=Sae1 PE=1 SV=1	12.8087	11.8545	11.8726	11.1635	10.9535	10.8564	7174.69	3703.05	3749.81	2293.76	1983.04	1853.97	2.38592	1.25455	0.0705836	1.1513
Methionine adenosyltransferase 2 subunit beta	Mat2b	sp|Q99LB6|MAT2B_MOUSE Methionine adenosyltransferase 2 subunit beta OS=Mus musculus OX=10090 GN=Mat2b PE=1 SV=1	14.4892	13.7341	12.6015	11.123	11.4066	11.1201	22997.7	13626.2	6214.83	2230.27	2714.74	2225.79	5.97406	2.57871	0.0706643	1.1508
E3 ubiquitin-protein ligase Itchy	Itch	sp|Q8C863|ITCH_MOUSE E3 ubiquitin-protein ligase Itchy OS=Mus musculus OX=10090 GN=Itch PE=1 SV=2	14.303	14.5277	14.0942	14.6079	14.8965	15.272	20213.1	23619.7	17489.5	24969.9	30499.5	39566.7	0.645251	-0.632067	0.0713635	1.14652
Phosphoglycerate kinase 1	Pgk1	sp|P09411|PGK1_MOUSE Phosphoglycerate kinase 1 OS=Mus musculus OX=10090 GN=Pgk1 PE=1 SV=4	16.949	17.3708	16.4748	16.3529	16.0875	15.9044	126519	169485	91077.1	83697.7	69633.8	61334	1.80319	0.850548	0.0714947	1.14573
Far upstream element (FUSE)-binding protein 3 (Fragment)	Fubp3	tr|A0A0A6YVV5|A0A0A6YVV5_MOUSE Far upstream element (FUSE)-binding protein 3 (Fragment) OS=Mus musculus OX=10090 GN=Fubp3 PE=1 SV=1;tr|A2AJ72|A2AJ72_MOUSE Far upstream element (FUSE)-binding protein 3 OS=Mus musculus OX=10090 GN=Fubp3 PE=1 SV=1;tr|Q3TIX6|Q	11.9774	11.8142	11.3971	12.5021	12.5708	11.966	4032.34	3601.05	2696.93	5801.06	6083.98	4000.6	0.650292	-0.62084	0.0719452	1.143
60S ribosomal protein L11	Rpl11	sp|Q9CXW4|RL11_MOUSE 60S ribosomal protein L11 OS=Mus musculus OX=10090 GN=Rpl11 PE=1 SV=4;tr|A2BH06|A2BH06_MOUSE 60S ribosomal protein L11 (Fragment) OS=Mus musculus OX=10090 GN=Rpl11 PE=1 SV=1	12.5424	12.0879	10.9787	10.1855	10.2349	10.6119	5965.39	4353.32	2017.99	1164.5	1205.07	1564.95	3.1355	1.6487	0.0720398	1.14243
Lysosome-associated membrane glycoprotein 2	Lamp2	sp|P17047|LAMP2_MOUSE Lysosome-associated membrane glycoprotein 2 OS=Mus musculus OX=10090 GN=Lamp2 PE=1 SV=2	14.3658	14.2989	14.5344	15.1941	15.5518	14.6748	21112.4	20155.7	23729.6	37486.9	48035.1	26155	0.582015	-0.780873	0.0721001	1.14206
DNA replication licensing factor MCM3	Mcm3	sp|P25206|MCM3_MOUSE DNA replication licensing factor MCM3 OS=Mus musculus OX=10090 GN=Mcm3 PE=1 SV=2	12.8312	12.3697	12.3604	12.2536	11.7776	11.3287	7287.46	5292.38	5258.37	4883.16	3510.84	2572.04	1.62668	0.701927	0.073214	1.13541
40S ribosomal protein SA	Rpsa	sp|P14206|RSSA_MOUSE 40S ribosomal protein SA OS=Mus musculus OX=10090 GN=Rpsa PE=1 SV=4;tr|A0A1L1SRW0|A0A1L1SRW0_MOUSE 40S ribosomal protein SA (Fragment) OS=Mus musculus OX=10090 GN=Rpsa PE=1 SV=1	18.4292	17.525	16.7352	15.7807	15.0999	15.2085	352973	188604	109093	56294.3	35117.4	37863	5.03324	2.33149	0.0735556	1.13338
Heterogeneous nuclear ribonucleoprotein A3	Hnrnpa3	sp|Q8BG05|ROA3_MOUSE Heterogeneous nuclear ribonucleoprotein A3 OS=Mus musculus OX=10090 GN=Hnrnpa3 PE=1 SV=1;tr|A2AL12|A2AL12_MOUSE Heterogeneous nuclear ribonucleoprotein A3 OS=Mus musculus OX=10090 GN=Hnrnpa3 PE=1 SV=1	13.2093	13.6921	12.5665	12.2352	11.1814	12.3666	9470.99	13235.3	6065.87	4821.28	2322.4	5281.02	2.31572	1.21146	0.0739211	1.13123
Synaptojanin-2	Synj2	sp|Q9D2G5|SYNJ2_MOUSE Synaptojanin-2 OS=Mus musculus OX=10090 GN=Synj2 PE=1 SV=2;tr|E9Q4P5|E9Q4P5_MOUSE Synaptojanin-2 OS=Mus musculus OX=10090 GN=Synj2 PE=1 SV=1;tr|D3YZB2|D3YZB2_MOUSE Synaptojanin-2 OS=Mus musculus OX=10090 GN=Synj2 PE=1 SV=1;tr|F8WHD8|F	9.82065	9.58869	8.85865	9.81816	10.6662	10.4788	904.295	769.987	464.215	902.736	1624.97	1427.03	0.540743	-0.886985	0.0739765	1.13091
Excitatory amino acid transporter 1	Slc1a3	sp|P56564|EAA1_MOUSE Excitatory amino acid transporter 1 OS=Mus musculus OX=10090 GN=Slc1a3 PE=1 SV=2	13.6746	14.9493	14.1706	14.8184	15.6362	15.4647	13075.7	31636.4	18440.6	28892.4	50929	45220.8	0.505052	-0.985497	0.0745211	1.12772
Vesicle-associated membrane protein-associated protein A;Vesicle-associated membrane protein-associated protein B	Vapa;Vapb	sp|Q9WV55|VAPA_MOUSE Vesicle-associated membrane protein-associated protein A OS=Mus musculus OX=10090 GN=Vapa PE=1 SV=2;sp|Q9QY76|VAPB_MOUSE Vesicle-associated membrane protein-associated protein B OS=Mus musculus OX=10090 GN=Vapb PE=1 SV=3;tr|Q8BH80|Q8BH	12.6065	12.3001	12.4821	11.3722	12.332	11.662	6236.41	5043.12	5721.19	2650.78	5155.87	3240.5	1.53892	0.621922	0.0754081	1.12258
Mitogen-activated protein kinase 15	Mapk15	sp|Q80Y86|MK15_MOUSE Mitogen-activated protein kinase 15 OS=Mus musculus OX=10090 GN=Mapk15 PE=1 SV=1	16.5171	15.5219	15.0436	14.0381	13.8402	13.6252	93787	47049.8	33773.4	16822.4	14666.1	12635.5	3.95725	1.9845	0.0756091	1.12143
Proprotein convertase subtilisin/kexin type 6	Pcsk6	tr|E9Q4D0|E9Q4D0_MOUSE Proprotein convertase subtilisin/kexin type 6 OS=Mus musculus OX=10090 GN=Pcsk6 PE=1 SV=2;tr|F6XJP7|F6XJP7_MOUSE Proprotein convertase subtilisin/kexin type 6 OS=Mus musculus OX=10090 GN=Pcsk6 PE=1 SV=1;tr|H3BJL4|H3BJL4_MOUSE Proprot	13.6148	12.7459	12.752	10.0119	12.0508	12.2943	12544.8	6869.07	6898.18	1032.48	4242.8	5022.88	2.55502	1.35334	0.0764136	1.11683
Serine/threonine-protein kinase N2	Pkn2	sp|Q8BWW9|PKN2_MOUSE Serine/threonine-protein kinase N2 OS=Mus musculus OX=10090 GN=Pkn2 PE=1 SV=3;tr|G3UXH4|G3UXH4_MOUSE Serine/threonine-protein kinase N2 OS=Mus musculus OX=10090 GN=Pkn2 PE=1 SV=1;tr|G3UZM9|G3UZM9_MOUSE Serine/threonine-protein kinase N	9.27651	9.50076	9.9634	10.054	10.3324	10.8631	620.166	724.459	998.349	1063.05	1289.32	1862.6	0.555869	-0.847184	0.0768383	1.11442
Ras-related protein Ral-A	Rala	sp|P63321|RALA_MOUSE Ras-related protein Ral-A OS=Mus musculus OX=10090 GN=Rala PE=1 SV=1;tr|A0A1Y7VL93|A0A1Y7VL93_MOUSE Ras-related protein Ral-A (Fragment) OS=Mus musculus OX=10090 GN=Rala PE=1 SV=1	12.9117	12.8432	13.5799	13.5172	14.098	13.8147	7705.64	7348.33	12245	11724.2	17535.6	14409.2	0.625133	-0.677764	0.0768707	1.11424
Galectin-1	Lgals1	sp|P16045|LEG1_MOUSE Galectin-1 OS=Mus musculus OX=10090 GN=Lgals1 PE=1 SV=3	15.5428	16.1219	16.0206	16.7205	16.5566	16.1306	47736.3	71314.1	66478.5	107987	96390.3	71745.5	0.671907	-0.573666	0.0789756	1.10251
Protein kish-A;Protein kish	Tmem167a;Tmem167	sp|Q9CR64|KISHA_MOUSE Protein kish-A OS=Mus musculus OX=10090 GN=Tmem167a PE=1 SV=1;tr|E0CY07|E0CY07_MOUSE Protein kish OS=Mus musculus OX=10090 GN=Tmem167 PE=1 SV=1	12.2745	12.6043	12.3774	11.346	12.2938	11.4963	4954.42	6226.91	5320.7	2603.07	5021.14	2888.89	1.56966	0.650454	0.0789839	1.10246
ATP-citrate synthase	Acly	sp|Q91V92|ACLY_MOUSE ATP-citrate synthase OS=Mus musculus OX=10090 GN=Acly PE=1 SV=1;tr|Q3V117|Q3V117_MOUSE ATP-citrate synthase OS=Mus musculus OX=10090 GN=Acly PE=1 SV=1;tr|Q3TS02|Q3TS02_MOUSE ATP-citrate synthase OS=Mus musculus OX=10090 GN=Acly PE=1 SV	16.7708	16.0754	15.3469	14.8307	14.6175	14.5847	111819	69052.2	41675.2	29139.7	25136.6	24571.5	2.82247	1.49696	0.0792912	1.10077
Pre-B-cell leukemia transcription factor-interacting protein 1	Pbxip1	sp|Q3TVI8|PBIP1_MOUSE Pre-B-cell leukemia transcription factor-interacting protein 1 OS=Mus musculus OX=10090 GN=Pbxip1 PE=1 SV=2;tr|D3YUE1|D3YUE1_MOUSE Pre-B-cell leukemia transcription factor-interacting protein 1 (Fragment) OS=Mus musculus OX=10090 GN=P	12.3048	12.0879	13.0794	12.921	14.0867	13.9718	5059.57	4353.32	8655.49	7755.48	17398.8	16066.9	0.438328	-1.18992	0.0793726	1.10033
Epidermal growth factor receptor substrate 15	Eps15	sp|P42567|EPS15_MOUSE Epidermal growth factor receptor substrate 15 OS=Mus musculus OX=10090 GN=Eps15 PE=1 SV=1;tr|F6W2Q5|F6W2Q5_MOUSE Epidermal growth factor receptor substrate 15 OS=Mus musculus OX=10090 GN=Eps15 PE=1 SV=1;tr|Q5JC28|Q5JC28_MOUSE Epiderma	11.4927	11.3387	11.2568	12.2908	12.1011	11.5154	2881.69	2589.93	2447	5010.71	4393.33	2927.39	0.64215	-0.639018	0.0801249	1.09623
Peroxiredoxin-2	Prdx2	sp|Q61171|PRDX2_MOUSE Peroxiredoxin-2 OS=Mus musculus OX=10090 GN=Prdx2 PE=1 SV=3;tr|D3Z4A4|D3Z4A4_MOUSE Peroxiredoxin-2 (Fragment) OS=Mus musculus OX=10090 GN=Prdx2 PE=1 SV=8	15.8149	16.438	16.2058	15.8622	15.5493	15.2893	57644.7	88783.3	75584.4	59565.9	47951.9	40044	1.50454	0.58932	0.0803621	1.09495
DnaJ homolog subfamily C member 5	Dnajc5	sp|P60904|DNJC5_MOUSE DnaJ homolog subfamily C member 5 OS=Mus musculus OX=10090 GN=Dnajc5 PE=1 SV=1;tr|A2AUE1|A2AUE1_MOUSE DnaJ homolog subfamily C member 5 (Fragment) OS=Mus musculus OX=10090 GN=Dnajc5 PE=1 SV=1;tr|G5E8T0|G5E8T0_MOUSE DnaJ homolog subfam	12.0744	13.0147	12.3537	13.195	13.1259	12.9993	4312.77	8275.9	5234.01	9377.58	8939.01	8188.03	0.672437	-0.57253	0.0810302	1.09135
Protein RCC2	Rcc2	sp|Q8BK67|RCC2_MOUSE Protein RCC2 OS=Mus musculus OX=10090 GN=Rcc2 PE=1 SV=1	15.8749	15.166	14.5465	14.0774	13.6423	14.0061	60092.6	36763.8	23929.5	17287	12786.2	16453.4	2.59606	1.37632	0.0812406	1.09023
Cullin-associated NEDD8-dissociated protein 1	Cand1	sp|Q6ZQ38|CAND1_MOUSE Cullin-associated NEDD8-dissociated protein 1 OS=Mus musculus OX=10090 GN=Cand1 PE=1 SV=2	15.3072	14.6274	15.2092	14.4732	14.492	14.6054	40544	25309.7	37881.3	22744	23042.3	24926.6	1.46699	0.552855	0.0812472	1.09019
Histone H2B type 1-C/E/G;Histone H2B type 1-H;Histone H2B type 1-F/J/L;Histone H2B type 1-M;Histone H2B type 1-B;Histone H2B type 2-B;Histone H2B type 1-P;Histone H2B type 1-K;Histone H2B;Histone H2B type 3-A;Histone H2B type 3-B;Histone H2B type 2-E;Histone H2B type 1-A	Hist1h2bc;Hist1h2bh;Hist1h2bf;Hist1h2bm;Hist1h2bb;Hist2h2bb;Hist1h2bp;Hist1h2bk;Hist1h2br;Hist3h2ba;Hist3h2bb;Hist2h2be;Hist1h2ba	sp|Q6ZWY9|H2B1C_MOUSE Histone H2B type 1-C/E/G OS=Mus musculus OX=10090 GN=H2bc4 PE=1 SV=3;sp|Q64478|H2B1H_MOUSE Histone H2B type 1-H OS=Mus musculus OX=10090 GN=H2bc9 PE=1 SV=3;sp|P10853|H2B1F_MOUSE Histone H2B type 1-F/J/L OS=Mus musculus OX=10090 GN=H2b	16.6954	17.1635	18.1534	15.4336	15.4957	15.898	106125	146801	291553	44256.4	46203	61062.5	3.5934	1.84535	0.0813543	1.08962
Histone H2A type 1-F;Histone H2A type 1-H;Histone H2A;Histone H2A type 3;Histone H2A.J;Histone H2A type 2-C;Histone H2A type 1-K;Histone H2A type 2-A;Histone H2AX	Hist1h2af;Hist1h2ah;Hist1h2aa;Hist3h2a;H2afj;Hist2h2ac;Hist1h2ak;Hist2h2aa1;H2afx	sp|C0HKE6|H2A1I_MOUSE Histone H2A type 1-I OS=Mus musculus OX=10090 GN=H2ac13 PE=1 SV=1;sp|C0HKE2|H2A1C_MOUSE Histone H2A type 1-C OS=Mus musculus OX=10090 GN=H2ac6 PE=1 SV=1;sp|C0HKE8|H2A1O_MOUSE Histone H2A type 1-O OS=Mus musculus OX=10090 GN=Hist1h2ao	17.4764	18.2905	19.0374	16.5831	16.4918	16.9554	182356	320619	538057	98177.2	92156.6	127082	3.27971	1.71357	0.0813717	1.08953
Tubulin beta-2A chain	Tubb2a	sp|Q7TMM9|TBB2A_MOUSE Tubulin beta-2A chain OS=Mus musculus OX=10090 GN=Tubb2a PE=1 SV=1	16.3594	16.8191	15.1526	15.0468	14.2124	14.2729	84075.6	115625	36424	33848.4	18982.7	19795.7	3.25121	1.70098	0.0813975	1.08939
TLR4 interactor with leucine rich repeats	Tril	sp|Q9DBY4|TRIL_MOUSE TLR4 interactor with leucine rich repeats OS=Mus musculus OX=10090 GN=Tril PE=2 SV=1	12.4839	11.96	11.3631	10.0491	10.371	11.4262	5728.33	3983.99	2634.11	1059.45	1324.29	2751.88	2.40408	1.26549	0.081622	1.08819
60S ribosomal protein L38	Rpl38	sp|Q9JJI8|RL38_MOUSE 60S ribosomal protein L38 OS=Mus musculus OX=10090 GN=Rpl38 PE=1 SV=3	14.594	13.6174	13.3407	12.5576	12.3061	12.4347	24730.4	12567.4	10374.1	6028.57	5064.13	5536.28	2.8668	1.51944	0.0817618	1.08745
Alcohol dehydrogenase class-3;Alcohol dehydrogenase class 4 mu/sigma chain	Adh5;Adh7	sp|P28474|ADHX_MOUSE Alcohol dehydrogenase class-3 OS=Mus musculus OX=10090 GN=Adh5 PE=1 SV=3;sp|Q64437|ADH7_MOUSE All-trans-retinol dehydrogenase [NAD(+)] ADH7 OS=Mus musculus OX=10090 GN=Adh7 PE=2 SV=2	14.4192	13.6804	13.7729	13.3503	13.3206	13.0585	21908.5	13128.4	13997.7	10443.4	10230.6	8531.01	1.67898	0.747584	0.0817775	1.08737
Septin-11	SEP11	sp|Q8C1B7|SEP11_MOUSE Septin-11 OS=Mus musculus OX=10090 GN=Septin11 PE=1 SV=4;tr|A0A0J9YTY0|A0A0J9YTY0_MOUSE Septin-11 OS=Mus musculus OX=10090 GN=Septin11 PE=1 SV=1;tr|A0A0J9YUL3|A0A0J9YUL3_MOUSE Septin-11 OS=Mus musculus OX=10090 GN=Septin11 PE=1 SV=1	14.4735	13.4374	13.7115	13.1604	12.6844	12.5176	22748.8	11093.3	13414.4	9155.35	6582.41	5863.72	2.18765	1.12938	0.0818841	1.0868
T-complex protein 1 subunit beta	Cct2	sp|P80314|TCPB_MOUSE T-complex protein 1 subunit beta OS=Mus musculus OX=10090 GN=Cct2 PE=1 SV=4;tr|A0A1W2P7B7|A0A1W2P7B7_MOUSE T-complex protein 1 subunit beta (Fragment) OS=Mus musculus OX=10090 GN=Cct2 PE=1 SV=1	18.2821	17.5515	16.9232	16.4208	16.2634	16.1745	318758	192100	124277	87731.1	78663.1	73962.2	2.64247	1.40189	0.0826472	1.08277
Ras-related protein Rab-21	Rab21	sp|P35282|RAB21_MOUSE Ras-related protein Rab-21 OS=Mus musculus OX=10090 GN=Rab21 PE=1 SV=4;tr|A0A1W2P6Z4|A0A1W2P6Z4_MOUSE Ras-related protein Rab-21 OS=Mus musculus OX=10090 GN=Rab21 PE=1 SV=1	12.6018	12.5905	12.7672	12.394	12.5794	12.3892	6216.13	6167.63	6971.24	5382.27	6120.36	5364.4	1.1475	0.1985	0.0826991	1.0825
Plasma membrane calcium-transporting ATPase 1	Atp2b1	sp|G5E829|AT2B1_MOUSE Plasma membrane calcium-transporting ATPase 1 OS=Mus musculus OX=10090 GN=Atp2b1 PE=1 SV=1	14.7834	14.5611	14.9618	15.1541	15.4569	14.9897	28199.9	24172.9	31911.7	36461.8	44977	32534.9	0.739508	-0.435363	0.08274	1.08228
Eukaryotic translation initiation factor 3 subunit A	Eif3a	sp|P23116|EIF3A_MOUSE Eukaryotic translation initiation factor 3 subunit A OS=Mus musculus OX=10090 GN=Eif3a PE=1 SV=5	14.778	14.2583	13.7814	13.4572	13.3847	13.505	28094.5	19596.4	14080.4	11246.6	10695.4	11625.5	1.84021	0.879874	0.0828036	1.08195
Eukaryotic translation initiation factor 3 subunit I	Eif3i	sp|Q9QZD9|EIF3I_MOUSE Eukaryotic translation initiation factor 3 subunit I OS=Mus musculus OX=10090 GN=Eif3i PE=1 SV=1;tr|A2AE03|A2AE03_MOUSE Eukaryotic translation initiation factor 3 subunit I (Fragment) OS=Mus musculus OX=10090 GN=Eif3i PE=1 SV=1	14.7162	13.8255	13.3814	11.5237	12.7821	12.7741	26916.4	14517.4	10670.9	2944.28	7043.61	7004.66	3.06633	1.61651	0.0828548	1.08168
Guanine nucleotide-binding protein subunit beta-2-like 1;Guanine nucleotide-binding protein subunit beta-2-like 1, N-terminally processed	Gnb2l1	sp|P68040|RACK1_MOUSE Receptor of activated protein C kinase 1 OS=Mus musculus OX=10090 GN=Rack1 PE=1 SV=3	18.3716	17.8748	16.4985	16.0326	15.687	15.7971	339158	240354	92585.6	67033.7	52754.3	56937.8	3.80305	1.92716	0.0828746	1.08158
S-methyl-5-thioadenosine phosphorylase	Mtap	sp|Q9CQ65|MTAP_MOUSE S-methyl-5-thioadenosine phosphorylase OS=Mus musculus OX=10090 GN=Mtap PE=1 SV=1	13.7208	13.3003	12.6558	12.5165	12.2394	12.333	13501.2	10087.6	6453.2	5859.25	4835.33	5159.44	1.89492	0.922133	0.08304	1.08071
Neurocan core protein	Ncan	tr|A0A0R4IZX5|A0A0R4IZX5_MOUSE Neurocan core protein OS=Mus musculus OX=10090 GN=Ncan PE=1 SV=1;sp|P55066|NCAN_MOUSE Neurocan core protein OS=Mus musculus OX=10090 GN=Ncan PE=1 SV=1	16.741	18.8812	18.6263	16.3858	15.8394	16.0307	109533	482845	404646	85628.3	58632	66945.5	4.72062	2.23898	0.0830528	1.08065
Eukaryotic translation initiation factor 3 subunit M	Eif3m	sp|Q99JX4|EIF3M_MOUSE Eukaryotic translation initiation factor 3 subunit M OS=Mus musculus OX=10090 GN=Eif3m PE=1 SV=1;tr|A2A701|A2A701_MOUSE Eukaryotic translation initiation factor 3 subunit M (Fragment) OS=Mus musculus OX=10090 GN=Eif3m PE=1 SV=1;tr|A2A	11.5587	11.4027	11.5385	11.8167	11.5881	11.6748	3016.58	2707.41	2974.64	3607.29	3078.69	3269.38	0.873765	-0.194683	0.083224	1.07975
Ubiquitin-like modifier-activating enzyme 1	Uba1	sp|Q02053|UBA1_MOUSE Ubiquitin-like modifier-activating enzyme 1 OS=Mus musculus OX=10090 GN=Uba1 PE=1 SV=1	18.8492	18.0156	17.3671	16.7789	16.5238	16.285	472253	264994	169051	112448	94223.5	79849.7	3.16311	1.66134	0.083277	1.07947
Tubulin beta-4B chain;Tubulin beta-4A chain	Tubb4b;Tubb4a	sp|P68372|TBB4B_MOUSE Tubulin beta-4B chain OS=Mus musculus OX=10090 GN=Tubb4b PE=1 SV=1;sp|Q9D6F9|TBB4A_MOUSE Tubulin beta-4A chain OS=Mus musculus OX=10090 GN=Tubb4a PE=1 SV=3	20.3209	19.5518	18.7315	18.2327	17.7716	17.762	1.30979e+06	768561	435255	308028	223761	222277	3.3334	1.73699	0.0840843	1.07528
Histidine triad nucleotide-binding protein 1	Hint1	sp|P70349|HINT1_MOUSE Histidine triad nucleotide-binding protein 1 OS=Mus musculus OX=10090 GN=Hint1 PE=1 SV=3;tr|B0R1E3|B0R1E3_MOUSE Histidine triad nucleotide-binding protein 1 OS=Mus musculus OX=10090 GN=Hint1 PE=1 SV=1	16.0682	15.2582	15.1744	14.8026	14.4607	14.4331	68708.5	39190.1	36978.5	28577.7	22547.8	22120.6	1.97795	0.984006	0.0840941	1.07523
40S ribosomal protein S18	Rps18;Gm10260	sp|P62270|RS18_MOUSE 40S ribosomal protein S18 OS=Mus musculus OX=10090 GN=Rps18 PE=1 SV=3;tr|S4R1N6|S4R1N6_MOUSE 40S ribosomal protein S18 OS=Mus musculus OX=10090 GN=Rps18 PE=3 SV=1;tr|F6YVP7|F6YVP7_MOUSE Ribosomal protein S18, pseudogene 6 OS=Mus muscul	16.1179	15.3685	14.4484	13.8938	13.5953	13.4162	71116.7	42303.8	22356.4	15221.3	12376.4	10931.5	3.52401	1.81722	0.084662	1.07231
NEDD8-activating enzyme E1 regulatory subunit	Nae1	sp|Q8VBW6|ULA1_MOUSE NEDD8-activating enzyme E1 regulatory subunit OS=Mus musculus OX=10090 GN=Nae1 PE=1 SV=1;tr|E0CZE0|E0CZE0_MOUSE NEDD8-activating enzyme E1 regulatory subunit OS=Mus musculus OX=10090 GN=Nae1 PE=1 SV=1	12.015	11.2654	11.3341	10.7968	11.0408	10.3723	4138.81	2461.63	2581.69	1778.94	2106.75	1325.48	1.76201	0.817224	0.0866953	1.062
Diphosphomevalonate decarboxylase	Mvd	sp|Q99JF5|MVD1_MOUSE Diphosphomevalonate decarboxylase OS=Mus musculus OX=10090 GN=Mvd PE=1 SV=2	12.0527	11.8774	11.4688	11.5376	11.2818	11.0857	4248.39	3762.3	2834.35	2972.79	2489.78	2173.34	1.42027	0.506164	0.0876689	1.05715
Ephrin-B1	Efnb1	sp|P52795|EFNB1_MOUSE Ephrin-B1 OS=Mus musculus OX=10090 GN=Efnb1 PE=1 SV=1	13.0025	12.6311	13.613	13.7444	13.9565	13.5477	8206.21	6343.66	12529.1	13723.9	15897.4	11974.7	0.651002	-0.619267	0.0880813	1.05512
ADAMTS-like 3	Adamtsl3	tr|G3UXC7|G3UXC7_MOUSE ADAMTS-like 3 OS=Mus musculus OX=10090 GN=Adamtsl3 PE=1 SV=1;tr|G3UWL5|G3UWL5_MOUSE ADAMTS-like 3 OS=Mus musculus OX=10090 GN=Adamtsl3 PE=1 SV=2	12.3271	12.108	12.7351	12.0558	11.6029	11.8609	5138.39	4414.39	6817.84	4257.53	3110.43	3719.52	1.4765	0.562178	0.0883456	1.05382
Ezrin	Ezr	sp|P26040|EZRI_MOUSE Ezrin OS=Mus musculus OX=10090 GN=Ezr PE=1 SV=3	12.6975	13.1872	13.1532	13.7952	14.3001	13.358	6642.45	9327.02	9109.78	14215.7	20172.5	10499.3	0.558714	-0.839818	0.0884897	1.05311
26S proteasome non-ATPase regulatory subunit 13	Psmd13	sp|Q9WVJ2|PSD13_MOUSE 26S proteasome non-ATPase regulatory subunit 13 OS=Mus musculus OX=10090 GN=Psmd13 PE=1 SV=1;tr|E9Q0U1|E9Q0U1_MOUSE 26S proteasome non-ATPase regulatory subunit 13 OS=Mus musculus OX=10090 GN=Psmd13 PE=1 SV=1;tr|E9Q5I9|E9Q5I9_MOUSE 26	12.393	11.3577	11.0393	10.4697	9.44162	9.9948	5378.54	2624.27	2104.56	1418.06	695.362	1020.32	3.22534	1.68945	0.0884903	1.0531
U8 snoRNA-decapping enzyme;Protein syndesmos	Nudt16;Nudt16l1;1700080E11Rik	sp|Q6P3D0|NUD16_MOUSE U8 snoRNA-decapping enzyme OS=Mus musculus OX=10090 GN=Nudt16 PE=1 SV=1;sp|Q8VHN8|TIRR_MOUSE Tudor-interacting repair regulator protein OS=Mus musculus OX=10090 GN=Nudt16l1 PE=1 SV=2;tr|A0A087WSB5|A0A087WSB5_MOUSE U8 snoRNA-decapping	11.5442	11.6976	11.3945	10.9785	10.1647	11.3771	2986.42	3321.46	2692.07	2017.71	1147.84	2659.8	1.54497	0.627574	0.0895228	1.04807
Filamin-A	Flna	sp|Q8BTM8|FLNA_MOUSE Filamin-A OS=Mus musculus OX=10090 GN=Flna PE=1 SV=5;tr|B7FAV1|B7FAV1_MOUSE Filamin, alpha (Fragment) OS=Mus musculus OX=10090 GN=Flna PE=1 SV=1;tr|B7FAU9|B7FAU9_MOUSE Filamin, alpha OS=Mus musculus OX=10090 GN=Flna PE=1 SV=1	14.6681	14.3008	14.8815	14.2009	14.0175	14.3098	26033.8	20182.3	30184.1	18832	16583.9	20308.6	1.37103	0.455263	0.0900521	1.04551
Cysteine-rich protein 2	Crip2	sp|Q9DCT8|CRIP2_MOUSE Cysteine-rich protein 2 OS=Mus musculus OX=10090 GN=Crip2 PE=1 SV=1	12.0011	11.043	12.2294	12.594	12.282	12.4806	4099.12	2109.96	4801.93	6182.61	4980.24	5715.25	0.652385	-0.616204	0.0900734	1.0454
Cytoplasmic dynein 1 heavy chain 1	Dync1h1	sp|Q9JHU4|DYHC1_MOUSE Cytoplasmic dynein 1 heavy chain 1 OS=Mus musculus OX=10090 GN=Dync1h1 PE=1 SV=2	19.0353	18.1108	17.7285	17.0847	16.8989	16.9271	537275	283070	217175	138998	122201	124613	2.68918	1.42717	0.0903287	1.04417
Histone H3.1;Histone H3.3;Histone H3.3C;Histone H3.2;Histone H3	Hist1h3a;H3f3a;H3f3c;Hist1h3b	sp|P68433|H31_MOUSE Histone H3.1 OS=Mus musculus OX=10090 GN=H3c1 PE=1 SV=2;sp|P84244|H33_MOUSE Histone H3.3 OS=Mus musculus OX=10090 GN=H3-3a PE=1 SV=2;sp|P02301|H3C_MOUSE Histone H3.3C OS=Mus musculus OX=10090 GN=H3-5 PE=3 SV=3;sp|P84228|H32_MOUSE Histon	14.8601	16.6491	16.6398	14.3596	14.0327	14.9886	29739.6	102773	102113	21021.8	16759.6	32510.1	3.33789	1.73893	0.0907266	1.04227
Protocadherin beta 21	Pcdhb21;Pcdhb19;Pcdhb22;Pcdhb13;Pcdhb7;Pcdhb6;Pcdhb4;Pcdhb15;Pcdhb5;Pcdhb2;Pcdhb17;Pcdhb9	tr|Q91V48|Q91V48_MOUSE Protocadherin beta 21 OS=Mus musculus OX=10090 GN=Pcdhb21 PE=2 SV=1;tr|Q91Y01|Q91Y01_MOUSE Protocadherin beta 19 OS=Mus musculus OX=10090 GN=Pcdhb19 PE=1 SV=1;tr|Q52KQ3|Q52KQ3_MOUSE Pcdhb22 protein OS=Mus musculus OX=10090 GN=Pcdhb22	11.6911	11.4394	12.1354	11.9833	12.6066	12.7101	3306.52	2777.17	4499.04	4048.86	6236.84	6700.72	0.623011	-0.68267	0.0910202	1.04086
Ataxin-3	Atxn3	sp|Q9CVD2|ATX3_MOUSE Ataxin-3 OS=Mus musculus OX=10090 GN=Atxn3 PE=1 SV=2;tr|F6T5L3|F6T5L3_MOUSE Ataxin-3 (Fragment) OS=Mus musculus OX=10090 GN=Atxn3 PE=1 SV=1;tr|E9Q717|E9Q717_MOUSE Ataxin-3 OS=Mus musculus OX=10090 GN=Atxn3 PE=1 SV=1;tr|Q5M8S1|Q5M8S1_MO	9.64457	10.4877	9.99291	10.9296	10.5102	11.4936	800.396	1435.86	1018.98	1950.46	1458.43	2883.49	0.51733	-0.950844	0.0913742	1.03918
cAMP-dependent protein kinase catalytic subunit alpha;cAMP-dependent protein kinase catalytic subunit beta	Prkaca;Prkacb	sp|P05132|KAPCA_MOUSE cAMP-dependent protein kinase catalytic subunit alpha OS=Mus musculus OX=10090 GN=Prkaca PE=1 SV=3;sp|P68181|KAPCB_MOUSE cAMP-dependent protein kinase catalytic subunit beta OS=Mus musculus OX=10090 GN=Prkacb PE=1 SV=2;tr|H6TMF5|H6TMF	13.1012	12.9866	11.933	11.4883	11.992	11.7667	8787.27	8116.26	3910.13	2872.92	4073.35	3484.41	1.99543	0.996698	0.091484	1.03865
Sodium/potassium-transporting ATPase subunit alpha-1	Atp1a1	sp|Q8VDN2|AT1A1_MOUSE Sodium/potassium-transporting ATPase subunit alpha-1 OS=Mus musculus OX=10090 GN=Atp1a1 PE=1 SV=1	17.2344	17.8503	18.5627	18.5421	19.3457	18.7929	154195	236307	387195	381705	666248	454179	0.517729	-0.949732	0.0916705	1.03777
Heterogeneous nuclear ribonucleoprotein A1;Heterogeneous nuclear ribonucleoprotein A1, N-terminally processed	Hnrnpa1	sp|P49312|ROA1_MOUSE Heterogeneous nuclear ribonucleoprotein A1 OS=Mus musculus OX=10090 GN=Hnrnpa1 PE=1 SV=2;tr|Q5EBP8|Q5EBP8_MOUSE Heterogeneous nuclear ribonucleoprotein A1 OS=Mus musculus OX=10090 GN=Hnrnpa1 PE=1 SV=1	11.88	10.76	11.1134	10.4325	10.3756	9.36329	3769.09	1734.13	2215.47	1381.96	1328.52	658.614	2.29103	1.196	0.091831	1.03701
UPF0687 protein C20orf27 homolog	1700037H04Rik	sp|Q9D1K7|CT027_MOUSE UPF0687 protein C20orf27 homolog OS=Mus musculus OX=10090 PE=1 SV=3;tr|H7BXB9|H7BXB9_MOUSE RIKEN cDNA 1700037H04 gene (Fragment) OS=Mus musculus OX=10090 GN=1700037H04Rik PE=1 SV=1;tr|F8WIU1|F8WIU1_MOUSE RIKEN cDNA 1700037H04 gene OS=	10.523	10.9261	10.4115	10.8534	11.254	11.5654	1471.43	1945.74	1361.99	1850.12	2442.26	3030.63	0.652622	-0.61568	0.0924012	1.03432
Xaa-Pro aminopeptidase 1	Xpnpep1	sp|Q6P1B1|XPP1_MOUSE Xaa-Pro aminopeptidase 1 OS=Mus musculus OX=10090 GN=Xpnpep1 PE=1 SV=1;tr|A0A494BBG8|A0A494BBG8_MOUSE Xaa-Pro aminopeptidase 1 OS=Mus musculus OX=10090 GN=Xpnpep1 PE=1 SV=1;tr|S4R1I3|S4R1I3_MOUSE Xaa-Pro aminopeptidase 1 OS=Mus musculu	13.5372	13.7078	12.6513	12.5847	12.5431	12.4593	11887.8	13380.1	6433.11	6142.88	5968.28	5631.49	1.78671	0.837309	0.0928445	1.03224
Type 2 phosphatidylinositol 4,5-bisphosphate 4-phosphatase	Tmem55a	sp|Q9CZX7|PP4P2_MOUSE Type 2 phosphatidylinositol 4,5-bisphosphate 4-phosphatase OS=Mus musculus OX=10090 GN=Pip4p2 PE=1 SV=1	10.3761	9.68915	10.632	11.4268	11.1447	10.5664	1328.98	825.515	1586.9	2753.02	2264.07	1516.36	0.572652	-0.804268	0.0928595	1.03217
Septin-2	SEPT2	sp|P42208|SEPT2_MOUSE Septin-2 OS=Mus musculus OX=10090 GN=Septin2 PE=1 SV=2;tr|E9Q3V6|E9Q3V6_MOUSE Septin-2 OS=Mus musculus OX=10090 GN=Septin2 PE=1 SV=1;tr|F6WYM0|F6WYM0_MOUSE Septin-2 (Fragment) OS=Mus musculus OX=10090 GN=Septin2 PE=1 SV=2;tr|D3YYB1|D3	15.1579	14.2824	13.6961	13.1463	12.6405	13.0513	36558	19926.5	13272	9066.31	6385.13	8488.54	2.91381	1.54291	0.0936547	1.02847
Integral membrane protein 2B;BRI2, membrane form;BRI2 intracellular domain;BRI2C, soluble form;Bri23 peptide	Itm2b	sp|O89051|ITM2B_MOUSE Integral membrane protein 2B OS=Mus musculus OX=10090 GN=Itm2b PE=1 SV=1;tr|A0A2I3BQ30|A0A2I3BQ30_MOUSE Integral membrane protein 2B OS=Mus musculus OX=10090 GN=Itm2b PE=1 SV=1	13.4972	13.2129	13.6472	13.8347	13.6217	14.0224	11562.8	9494.66	12829.7	14610.3	12604.9	16640.4	0.772698	-0.372024	0.093676	1.02837
Probable lysosomal cobalamin transporter	Lmbrd1	sp|Q8K0B2|LMBD1_MOUSE Lysosomal cobalamin transport escort protein LMBD1 OS=Mus musculus OX=10090 GN=Lmbrd1 PE=1 SV=1	9.4763	10.6877	8.94959	10.4179	11.2338	11.1068	712.28	1649.37	494.419	1368.05	2408.3	2205.36	0.477467	-1.06653	0.0939717	1.027
26S protease regulatory subunit 7	Psmc2	sp|P46471|PRS7_MOUSE 26S proteasome regulatory subunit 7 OS=Mus musculus OX=10090 GN=Psmc2 PE=1 SV=5;tr|Q8BVQ9|Q8BVQ9_MOUSE 26S proteasome regulatory subunit 7 OS=Mus musculus OX=10090 GN=Psmc2 PE=1 SV=1	16.2637	15.3811	14.9267	14.1384	14.2084	14.4193	78679.5	42674.9	31144.7	18033.6	18930.2	21910	2.59027	1.3731	0.0955132	1.01994
NEDD8	Nedd8	sp|P29595|NEDD8_MOUSE NEDD8 OS=Mus musculus OX=10090 GN=Nedd8 PE=1 SV=2	12.4138	12.9614	13.403	13.5595	13.5923	13.3657	5456.65	7975.73	10831.9	12073	12350.7	10555.4	0.693679	-0.52766	0.0963772	1.01603
BAG family molecular chaperone regulator 4	Bag4	sp|Q8CI61|BAG4_MOUSE BAG family molecular chaperone regulator 4 OS=Mus musculus OX=10090 GN=Bag4 PE=1 SV=2	10.1378	10.4477	10.8005	10.9696	10.9093	10.7497	1126.63	1396.6	1783.51	2005.3	1923.21	1721.8	0.762213	-0.391734	0.0980874	1.00839
Bifunctional 3-phosphoadenosine 5-phosphosulfate synthase 1;Sulfate adenylyltransferase;Adenylyl-sulfate kinase	Papss1	sp|Q60967|PAPS1_MOUSE Bifunctional 3-phosphoadenosine 5-phosphosulfate synthase 1 OS=Mus musculus OX=10090 GN=Papss1 PE=1 SV=1;tr|Q6NZM8|Q6NZM8_MOUSE Bifunctional 3-phosphoadenosine 5-phosphosulfate synthase 1 OS=Mus musculus OX=10090 GN=Papss1 PE=1 SV	13.3151	12.5123	12.4811	12.0161	12.2102	10.9292	10191.6	5842.22	5717.23	4141.97	4738.45	1949.92	2.00835	1.00601	0.098644	1.00593
Nuclear cap-binding protein subunit 1	Ncbp1	sp|Q3UYV9|NCBP1_MOUSE Nuclear cap-binding protein subunit 1 OS=Mus musculus OX=10090 GN=Ncbp1 PE=1 SV=2	13.2927	12.784	11.3148	10.1826	10.2755	11.4598	10034.6	7052.9	2547.38	1162.17	1239.46	2816.72	3.76267	1.91176	0.0987124	1.00563
Hydroxymethylglutaryl-CoA synthase, cytoplasmic	Hmgcs1	sp|Q8JZK9|HMCS1_MOUSE Hydroxymethylglutaryl-CoA synthase, cytoplasmic OS=Mus musculus OX=10090 GN=Hmgcs1 PE=1 SV=1	15.8798	15.1177	14.8819	14.6485	14.4434	13.9093	60297.1	35553.4	30192.4	25682.5	22279	15385.7	1.98971	0.992561	0.0987944	1.00527
60S ribosomal protein L12	Rpl12	sp|P35979|RL12_MOUSE 60S ribosomal protein L12 OS=Mus musculus OX=10090 GN=Rpl12 PE=1 SV=2	15.6554	14.8911	15.1761	14.554	14.7461	14.7054	51611.3	30385.6	37022.1	24054.2	27480.1	26715.7	1.52101	0.60503	0.0992431	1.0033
Zinc transporter 1	Slc30a1	sp|Q60738|ZNT1_MOUSE Zinc transporter 1 OS=Mus musculus OX=10090 GN=Slc30a1 PE=1 SV=1	11.9421	10.5364	11.1657	12.2843	12.2781	11.747	3934.87	1485.16	2297.26	4988.19	4966.8	3437.16	0.576255	-0.795221	0.0992929	1.00308
CD63 antigen	Cd63	sp|P41731|CD63_MOUSE CD63 antigen OS=Mus musculus OX=10090 GN=Cd63 PE=1 SV=2;tr|A0A1W2P8C6|A0A1W2P8C6_MOUSE Tetraspanin (Fragment) OS=Mus musculus OX=10090 GN=Cd63 PE=1 SV=1	11.3982	12.5399	10.9286	9.03914	9.35082	10.4454	2698.98	5955.06	1949.11	526.081	652.946	1394.37	4.12029	2.04275	0.100665	0.99712
Calcyclin-binding protein	Cacybp	sp|Q9CXW3|CYBP_MOUSE Calcyclin-binding protein OS=Mus musculus OX=10090 GN=Cacybp PE=1 SV=1;tr|A0A0A6YY29|A0A0A6YY29_MOUSE Calcyclin-binding protein (Fragment) OS=Mus musculus OX=10090 GN=Cacybp PE=1 SV=1	12.5457	12.4774	12.9254	12.4884	12.0884	11.9522	5979.05	5702.58	7779.17	5746.23	4354.83	3962.51	1.38377	0.468608	0.100761	0.996706
Probable ATP-dependent RNA helicase DDX5	Ddx5	sp|Q61656|DDX5_MOUSE Probable ATP-dependent RNA helicase DDX5 OS=Mus musculus OX=10090 GN=Ddx5 PE=1 SV=2;tr|Q8BTS0|Q8BTS0_MOUSE DEAD (Asp-Glu-Ala-Asp) box polypeptide 5 OS=Mus musculus OX=10090 GN=Ddx5 PE=1 SV=1;tr|S4R1I6|S4R1I6_MOUSE Probable ATP-dependen	17.6834	16.6457	15.6961	14.6735	14.3682	14.4983	210491	102531	53088.1	26131.5	21147.5	23143.2	5.19879	2.37818	0.101363	0.994121
Serine/threonine-protein phosphatase 2A catalytic subunit alpha isoform;Serine/threonine-protein phosphatase 2A catalytic subunit beta isoform	Ppp2ca;Ppp2cb	sp|P63330|PP2AA_MOUSE Serine/threonine-protein phosphatase 2A catalytic subunit alpha isoform OS=Mus musculus OX=10090 GN=Ppp2ca PE=1 SV=1;sp|P62715|PP2AB_MOUSE Serine/threonine-protein phosphatase 2A catalytic subunit beta isoform OS=Mus musculus OX=10090	11.8594	12.6285	11.9664	11.3709	11.6684	11.4211	3715.65	6332.24	4001.71	2648.39	3254.91	2742.17	1.62508	0.700514	0.101372	0.994081
Protein quaking	Qki	sp|Q9QYS9|QKI_MOUSE Protein quaking OS=Mus musculus OX=10090 GN=Qki PE=1 SV=1;tr|A0A3B2WCH2|A0A3B2WCH2_MOUSE Quaking (Fragment) OS=Mus musculus OX=10090 GN=Qk PE=1 SV=1	12.4144	12.5838	12.7007	12.8294	12.8865	12.657	5458.92	6139.05	6657.2	7278.37	7572.22	6458.57	0.856682	-0.223169	0.101782	0.992327
Cell division control protein 42 homolog	Cdc42	sp|P60766|CDC42_MOUSE Cell division control protein 42 homolog OS=Mus musculus OX=10090 GN=Cdc42 PE=1 SV=2	13.2466	12.7576	13.0187	13.1712	13.6424	13.9198	9719.05	6925.01	8298.87	9224.15	12787.1	15498.1	0.66498	-0.588617	0.102797	0.988022
Neuronal membrane glycoprotein M6-b	Gpm6b	sp|P35803|GPM6B_MOUSE Neuronal membrane glycoprotein M6-b OS=Mus musculus OX=10090 GN=Gpm6b PE=1 SV=2;tr|A2AEG3|A2AEG3_MOUSE Neuronal membrane glycoprotein M6-b OS=Mus musculus OX=10090 GN=Gpm6b PE=1 SV=1;tr|A2AEG6|A2AEG6_MOUSE Neuronal membrane glycoprote	13.7286	13.3475	14.0315	14.4038	15.0119	14.097	13574.4	10423.1	16745.7	21675.8	33039.4	17523.5	0.564008	-0.826213	0.10289	0.987626
ATP-dependent RNA helicase DHX36	Dhx36	sp|Q8VHK9|DHX36_MOUSE ATP-dependent DNA/RNA helicase DHX36 OS=Mus musculus OX=10090 GN=Dhx36 PE=1 SV=2	12.0225	11.519	10.408	9.87359	9.45336	10.5469	4160.38	2934.71	1358.69	938.095	701.043	1496.01	2.69646	1.43106	0.103711	0.984174
U5 small nuclear ribonucleoprotein 40 kDa protein	Snrnp40	sp|Q6PE01|SNR40_MOUSE U5 small nuclear ribonucleoprotein 40 kDa protein OS=Mus musculus OX=10090 GN=Snrnp40 PE=1 SV=1	13.2197	13.3454	11.8665	12.1247	11.5828	11.2474	9539.51	10408	3733.98	4465.79	3067.4	2431.11	2.37663	1.24892	0.103894	0.98341
Annexin;Annexin A6	Anxa6	tr|F8WIT2|F8WIT2_MOUSE Annexin OS=Mus musculus OX=10090 GN=Anxa6 PE=1 SV=1;sp|P14824|ANXA6_MOUSE Annexin A6 OS=Mus musculus OX=10090 GN=Anxa6 PE=1 SV=3	15.8348	17.1072	16.9773	15.9271	15.7762	15.4479	58445.3	141182	129026	62306.7	56118.9	44697.3	2.01476	1.01061	0.103922	0.983293
BTB/POZ domain-containing protein 17	Btbd17	sp|Q9DB72|BTBDH_MOUSE BTB/POZ domain-containing protein 17 OS=Mus musculus OX=10090 GN=Btbd17 PE=1 SV=1	13.5838	12.9106	13.0939	12.6972	12.6668	12.7395	12278.1	7699.77	8742.92	6641.07	6502.6	6838.67	1.43731	0.523371	0.103963	0.983123
40S ribosomal protein S5;40S ribosomal protein S5, N-terminally processed	Rps5	sp|P97461|RS5_MOUSE 40S ribosomal protein S5 OS=Mus musculus OX=10090 GN=Rps5 PE=1 SV=3;tr|D3YYM6|D3YYM6_MOUSE 40S ribosomal protein S5 (Fragment) OS=Mus musculus OX=10090 GN=Rps5 PE=1 SV=1;tr|D3Z1S8|D3Z1S8_MOUSE 40S ribosomal protein S5 (Fragment) OS=Mus	16.0653	14.9369	14.6754	14.0291	13.6398	13.5961	68570.5	31365.7	26165.9	16717.8	12764.1	12383.2	3.0121	1.59077	0.10464	0.980301
Neurogenic locus notch homolog protein 1;Notch 1 extracellular truncation;Notch 1 intracellular domain	Notch1	sp|Q01705|NOTC1_MOUSE Neurogenic locus notch homolog protein 1 OS=Mus musculus OX=10090 GN=Notch1 PE=1 SV=3	14.709	14.8039	14.7607	14.7856	15.3237	15.2474	26782.4	28603.4	27759.6	28242.9	41010.3	38897.8	0.768791	-0.379337	0.104696	0.980071
Adapter molecule crk	Crk	sp|Q64010|CRK_MOUSE Adapter molecule crk OS=Mus musculus OX=10090 GN=Crk PE=1 SV=1;tr|Q8JZR2|Q8JZR2_MOUSE Adapter molecule crk OS=Mus musculus OX=10090 GN=Crk PE=1 SV=1;tr|Q3TQV3|Q3TQV3_MOUSE Adapter molecule crk OS=Mus musculus OX=10090 GN=Crk PE=1 SV=1;t	8.77816	10.1852	9.66892	9.94377	10.8609	11.1131	439.025	1164.26	814.02	984.857	1859.76	2215.01	0.477764	-1.06563	0.104732	0.97992
26S protease regulatory subunit 4	Psmc1	sp|P62192|PRS4_MOUSE 26S proteasome regulatory subunit 4 OS=Mus musculus OX=10090 GN=Psmc1 PE=1 SV=1	15.2709	14.3357	14.2707	14.002	13.5088	13.2194	39536.6	20676.4	19765.5	16406.7	11656.1	9537.53	2.12707	1.08887	0.104738	0.979894
Cytoplasmic dynein 1 intermediate chain 2	Dync1i2	sp|O88487|DC1I2_MOUSE Cytoplasmic dynein 1 intermediate chain 2 OS=Mus musculus OX=10090 GN=Dync1i2 PE=1 SV=1;tr|A2BFF8|A2BFF8_MOUSE Cytoplasmic dynein 1 intermediate chain 2 OS=Mus musculus OX=10090 GN=Dync1i2 PE=1 SV=1;tr|Q3TPJ8|Q3TPJ8_MOUSE Cytoplasmic	13.5944	12.6352	12.4619	11.7699	11.9983	11.7056	12368.6	6361.71	5641.64	3492.15	4091.18	3339.93	2.2312	1.15782	0.104811	0.979591
40S ribosomal protein S15a	Rps15a	sp|P62245|RS15A_MOUSE 40S ribosomal protein S15a OS=Mus musculus OX=10090 GN=Rps15a PE=1 SV=2;tr|D3YVB4|D3YVB4_MOUSE 40S ribosomal protein S15a (Fragment) OS=Mus musculus OX=10090 GN=Rps15a PE=1 SV=1;tr|D3Z712|D3Z712_MOUSE 40S ribosomal protein S15a (Fragm	16.2329	14.6107	14.4418	12.6074	11.4927	11.8507	77017.6	25018.4	22254.4	6240.3	2881.69	3693.31	9.69858	3.27777	0.105684	0.975989
Pleckstrin homology-like domain family A member 3	Phlda3	sp|Q9WV95|PHLA3_MOUSE Pleckstrin homology-like domain family A member 3 OS=Mus musculus OX=10090 GN=Phlda3 PE=1 SV=1	11.9213	12.1845	12.8387	13.1714	12.886	12.75	3878.55	4654.79	7325.44	9225.43	7569.59	6888.62	0.669609	-0.57861	0.105924	0.975005
tRNA-splicing ligase RtcB homolog	Rtcb	sp|Q99LF4|RTCB_MOUSE RNA-splicing ligase RtcB homolog OS=Mus musculus OX=10090 GN=Rtcb PE=1 SV=1	16.4847	15.5908	14.6501	13.6584	14.0519	13.9997	91704.2	49351.3	25711	12929.7	16984.1	16380.6	3.6023	1.84892	0.106528	0.972538
Trifunctional purine biosynthetic protein adenosine-3;Phosphoribosylamine--glycine ligase;Phosphoribosylformylglycinamidine cyclo-ligase;Phosphoribosylglycinamide formyltransferase	Gart	sp|Q64737|PUR2_MOUSE Trifunctional purine biosynthetic protein adenosine-3 OS=Mus musculus OX=10090 GN=Gart PE=1 SV=3;tr|A0A338P676|A0A338P676_MOUSE Trifunctional purine biosynthetic protein adenosine-3 (Fragment) OS=Mus musculus OX=10090 GN=Gart PE=1 SV=1	10.9727	10.8481	11.1756	11.0889	11.6382	11.8454	2009.61	1843.33	2313.08	2178.17	3187.48	3679.77	0.681674	-0.552847	0.10679	0.971471
Trk-fused gene (Fragment)	Tfg	tr|Q9Z1A1|Q9Z1A1_MOUSE TFG protein OS=Mus musculus OX=10090 GN=Tfg PE=1 SV=1;tr|B8JJG9|B8JJG9_MOUSE Trk-fused gene (Fragment) OS=Mus musculus OX=10090 GN=Tfg PE=1 SV=1;tr|B8JJG7|B8JJG7_MOUSE Trk-fused gene (Fragment) OS=Mus musculus OX=10090 GN=Tfg PE=1 SV	12.7575	12.9621	12.9216	13.0827	13.1138	13.5364	6924.53	7979.6	7758.7	8675.31	8864.36	11881.3	0.770296	-0.376515	0.106969	0.970742
Heat shock-related 70 kDa protein 2	Hspa2	sp|P17156|HSP72_MOUSE Heat shock-related 70 kDa protein 2 OS=Mus musculus OX=10090 GN=Hspa2 PE=1 SV=2	12.6409	12.5137	12.7797	12.7095	13.0425	12.9687	6386.9	5847.89	7031.91	6697.93	8436.92	8016.18	0.832217	-0.264968	0.107317	0.96933
High mobility group protein B1	Hmgb1	sp|P63158|HMGB1_MOUSE High mobility group protein B1 OS=Mus musculus OX=10090 GN=Hmgb1 PE=1 SV=2;tr|A0A0J9YUD8|A0A0J9YUD8_MOUSE High mobility group protein B1 OS=Mus musculus OX=10090 GN=Hmgb1 PE=1 SV=1;tr|A0A0J9YUZ4|A0A0J9YUZ4_MOUSE High mobility group pr	13.5994	14.0891	14.1246	14.4886	14.2488	14.1964	12411.6	17427.8	17861.9	22988.1	19467.8	18773.4	0.77906	-0.360193	0.107637	0.968037
Mitogen-activated protein kinase 1	Mapk1	sp|P63085|MK01_MOUSE Mitogen-activated protein kinase 1 OS=Mus musculus OX=10090 GN=Mapk1 PE=1 SV=3;tr|A0A338P736|A0A338P736_MOUSE Mitogen-activated protein kinase 1 (Fragment) OS=Mus musculus OX=10090 GN=Mapk1 PE=1 SV=1	16.6512	15.8474	15.2321	14.7585	14.918	14.5025	102923	58958	38487.4	27717.3	30957.5	23210.7	2.44693	1.29097	0.108041	0.966413
Aldose reductase	Akr1b1	sp|P45376|ALDR_MOUSE Aldo-keto reductase family 1 member B1 OS=Mus musculus OX=10090 GN=Akr1b1 PE=1 SV=3	13.6678	13.1826	12.2126	12.0998	11.9756	11.903	13014.2	9297.33	4746.34	4389.38	4027.31	3829.66	2.20947	1.1437	0.10842	0.964889
26S proteasome non-ATPase regulatory subunit 6	Psmd6	sp|Q99JI4|PSMD6_MOUSE 26S proteasome non-ATPase regulatory subunit 6 OS=Mus musculus OX=10090 GN=Psmd6 PE=1 SV=1	14.7079	13.7563	13.7124	13.2953	13.1716	12.8117	26762	13837.5	13422.8	10052.7	9226.71	7189.62	2.04096	1.02925	0.108586	0.964228
Protocadherin gamma B2	Pcdhgb2	tr|Q91XX7|Q91XX7_MOUSE Protocadherin gamma B2 OS=Mus musculus OX=10090 GN=Pcdhgb2 PE=1 SV=1	12.6408	12.0879	12.317	12.8159	12.5462	13.0753	6386.46	4353.32	5102.54	7210.58	5981.12	8630.93	0.725958	-0.462042	0.10874	0.96361
Serine/threonine-protein phosphatase 2A 56 kDa regulatory subunit gamma isoform	Ppp2r5d;Ppp2r5c	tr|Q7TNL5|Q7TNL5_MOUSE Serine/threonine-protein phosphatase 2A 56 kDa regulatory subunit OS=Mus musculus OX=10090 GN=Ppp2r5d PE=1 SV=1;tr|Q91V89|Q91V89_MOUSE Serine/threonine-protein phosphatase 2A 56 kDa regulatory subunit OS=Mus musculus OX=10090 GN=Ppp2	12.2646	12.4212	11.1491	11.0361	8.37891	11.4123	4920.54	5484.71	2270.98	2099.89	332.892	2725.49	2.45746	1.29717	0.109722	0.959708
Spermidine synthase	Srm	sp|Q64674|SPEE_MOUSE Spermidine synthase OS=Mus musculus OX=10090 GN=Srm PE=1 SV=1	13.4226	12.2345	12.457	11.8846	11.5078	11.3739	10980.1	4818.94	5622.52	3781.13	2912.01	2653.9	2.2918	1.19648	0.109722	0.959706
Glyceraldehyde-3-phosphate dehydrogenase	Gapdh	sp|P16858|G3P_MOUSE Glyceraldehyde-3-phosphate dehydrogenase OS=Mus musculus OX=10090 GN=Gapdh PE=1 SV=2;tr|A0A0A0MQF6|A0A0A0MQF6_MOUSE Glyceraldehyde-3-phosphate dehydrogenase OS=Mus musculus OX=10090 GN=Gapdh PE=1 SV=1;tr|S4R257|S4R257_MOUSE Glyceraldehy	18.7542	17.5829	17.5215	16.7166	16.8053	16.4613	442157	196327	188147	107696	114525	90228.8	2.64565	1.40362	0.109833	0.959267
Calcium-transporting ATPase	Atp2b4	sp|Q6Q477|AT2B4_MOUSE Plasma membrane calcium-transporting ATPase 4 OS=Mus musculus OX=10090 GN=Atp2b4 PE=1 SV=1;tr|E9Q828|E9Q828_MOUSE Calcium-transporting ATPase OS=Mus musculus OX=10090 GN=Atp2b4 PE=1 SV=1;tr|F7AAP4|F7AAP4_MOUSE Calcium-transporting ATP	11.4241	11.775	11.9669	12.4675	13.2263	12.1622	2747.87	3504.52	4003.09	5663.59	9583.25	4583.39	0.517164	-0.951306	0.110558	0.95641
Guanine nucleotide-binding protein G(I)/G(S)/G(O) subunit gamma-12	Gng12	sp|Q9DAS9|GBG12_MOUSE Guanine nucleotide-binding protein G(I)/G(S)/G(O) subunit gamma-12 OS=Mus musculus OX=10090 GN=Gng12 PE=1 SV=3;tr|A0A0N4SVT3|A0A0N4SVT3_MOUSE Guanine nucleotide-binding protein subunit gamma (Fragment) OS=Mus musculus OX=10090 GN=Gng1	10.999	9.77978	11.9945	11.8814	12.3196	12.0785	2046.58	879.037	4080.41	3772.75	5111.74	4325.05	0.530377	-0.914911	0.11074	0.955696
Flotillin-1	Flot1	sp|O08917|FLOT1_MOUSE Flotillin-1 OS=Mus musculus OX=10090 GN=Flot1 PE=1 SV=1;tr|G3UZZ5|G3UZZ5_MOUSE Flotillin (Fragment) OS=Mus musculus OX=10090 GN=Flot1 PE=1 SV=1;tr|G3UWW8|G3UWW8_MOUSE Flotillin (Fragment) OS=Mus musculus OX=10090 GN=Flot1 PE=1 SV=1	11.0266	10.2569	10.9046	11.273	11.3444	12.1455	2086.11	1223.59	1916.95	2474.63	2600.19	4530.64	0.544133	-0.877969	0.111058	0.954451
Transmembrane protein 2	Tmem2	sp|Q5FWI3|CEIP2_MOUSE Cell surface hyaluronidase OS=Mus musculus OX=10090 GN=Cemip2 PE=1 SV=1	12.7991	12.8413	13.2056	13.0582	13.7009	13.5291	7127.1	7338.66	9446.73	8529.23	13316.2	11821.3	0.71027	-0.493561	0.111314	0.953448
Histone H4	Hist1h4a	sp|P62806|H4_MOUSE Histone H4 OS=Mus musculus OX=10090 GN=H4c1 PE=1 SV=2	15.3207	16.4422	17.2781	14.8733	14.6358	14.5537	40925.1	89042.1	158937	30013	25457.4	24049.2	3.63313	1.86121	0.111651	0.952136
ATP-dependent RNA helicase A	Dhx9	tr|A0A087WPL5|A0A087WPL5_MOUSE ATP-dependent RNA helicase A OS=Mus musculus OX=10090 GN=Dhx9 PE=1 SV=1;tr|E9QNN1|E9QNN1_MOUSE ATP-dependent RNA helicase A OS=Mus musculus OX=10090 GN=Dhx9 PE=1 SV=1;sp|O70133|DHX9_MOUSE ATP-dependent RNA helicase A OS=Mus m	17.3995	16.5709	15.7523	15.3272	15.1275	15.2285	172891	97350.4	55196.9	41110	35795.7	38391.5	2.8226	1.49703	0.111884	0.951233
STAM-binding protein	Stambp	sp|Q9CQ26|STABP_MOUSE STAM-binding protein OS=Mus musculus OX=10090 GN=Stambp PE=1 SV=1	9.47147	10.099	9.28227	10.7446	10.6088	9.82286	709.899	1096.74	622.647	1715.72	1561.59	905.682	0.580752	-0.784006	0.112171	0.950121
Eukaryotic initiation factor 4A-I	Eif4a1	sp|P60843|IF4A1_MOUSE Eukaryotic initiation factor 4A-I OS=Mus musculus OX=10090 GN=Eif4a1 PE=1 SV=1	16.8201	16.6513	16.2353	16.2693	15.8446	16.2534	115706	102930	77145.8	78985.5	58843.7	78119.8	1.36968	0.45384	0.112204	0.94999
Ran GTPase-activating protein 1	Rangap1	sp|P46061|RAGP1_MOUSE Ran GTPase-activating protein 1 OS=Mus musculus OX=10090 GN=Rangap1 PE=1 SV=2;tr|A0A2R8VHK9|A0A2R8VHK9_MOUSE Ran GTPase-activating protein 1 (Fragment) OS=Mus musculus OX=10090 GN=Rangap1 PE=1 SV=1	13.6173	13.2317	13.628	13.1664	13.2889	13.1965	12566.5	9619.19	12660.1	9193.51	10008.2	9387.34	1.21885	0.285522	0.11242	0.949157
Exocyst complex component 8	Exoc8	sp|Q6PGF7|EXOC8_MOUSE Exocyst complex component 8 OS=Mus musculus OX=10090 GN=Exoc8 PE=1 SV=1	10.0808	9.35323	9.62038	10.5011	10.8221	9.89997	1082.99	654.038	787.087	1449.26	1810.41	955.406	0.59883	-0.739782	0.112854	0.947481
Platelet-activating factor acetylhydrolase IB subunit alpha	Pafah1b1	sp|P63005|LIS1_MOUSE Platelet-activating factor acetylhydrolase IB subunit alpha OS=Mus musculus OX=10090 GN=Pafah1b1 PE=1 SV=2;tr|Q5SW16|Q5SW16_MOUSE Platelet-activating factor acetylhydrolase IB subunit alpha (Fragment) OS=Mus musculus OX=10090 GN=Pafah1	13.7594	13.0356	13.0471	12.4626	12.8513	12.6106	13867.3	8396.66	8463.86	5644.38	7389.7	6254.16	1.59309	0.671824	0.112875	0.947402
Reticulon-1	Rtn1	sp|Q8K0T0|RTN1_MOUSE Reticulon-1 OS=Mus musculus OX=10090 GN=Rtn1 PE=1 SV=1	12.6866	11.8251	12.9582	13.2413	13.5693	12.8803	6592.45	3628.36	7958.05	9683.41	12155.3	7539.74	0.618782	-0.692498	0.113341	0.945613
Long-chain specific acyl-CoA dehydrogenase, mitochondrial	Acadl	sp|P51174|ACADL_MOUSE Long-chain specific acyl-CoA dehydrogenase, mitochondrial OS=Mus musculus OX=10090 GN=Acadl PE=1 SV=2;tr|A0A0R4J083|A0A0R4J083_MOUSE Long-chain-specific acyl-CoA dehydrogenase, mitochondrial OS=Mus musculus OX=10090 GN=Acadl PE=1 SV=1	11.5407	11.8561	10.5178	9.63421	9.86644	10.9014	2979.18	3707.16	1466.13	794.669	933.457	1912.71	2.23918	1.16297	0.114711	0.940396
Protein KHNYN	Khnyn	sp|Q80U38|KHNYN_MOUSE Protein KHNYN OS=Mus musculus OX=10090 GN=Khnyn PE=2 SV=2;tr|A0A2I3BPI4|A0A2I3BPI4_MOUSE Protein KHNYN OS=Mus musculus OX=10090 GN=Khnyn PE=1 SV=1	12.3409	12.6432	11.6145	12.5457	12.8783	13.1385	5187.77	6397.09	3135.54	5979.05	7529.3	9017.43	0.653492	-0.613759	0.114807	0.940032
Clusterin;Clusterin beta chain;Clusterin alpha chain	Clu	sp|Q06890|CLUS_MOUSE Clusterin OS=Mus musculus OX=10090 GN=Clu PE=1 SV=1;tr|E9PUU2|E9PUU2_MOUSE Clusterin (Fragment) OS=Mus musculus OX=10090 GN=Clu PE=1 SV=1;tr|E9PXG5|E9PXG5_MOUSE Clusterin (Fragment) OS=Mus musculus OX=10090 GN=Clu PE=1 SV=1;tr|E9Q8Y5|E	17.8186	17.591	16.6859	16.1554	15.7581	17.0522	231171	197433	105428	72989.4	55419.3	135901	2.02047	1.01469	0.115327	0.93807
Importin-5	Ipo5	sp|Q8BKC5|IPO5_MOUSE Importin-5 OS=Mus musculus OX=10090 GN=Ipo5 PE=1 SV=3	13.541	12.6768	13.5476	12.7018	12.7357	12.5782	11919.2	6547.82	11973.9	6662.28	6820.68	6115.27	1.55325	0.635287	0.116876	0.932276
WW domain-binding protein 2	Wbp2	sp|P97765|WBP2_MOUSE WW domain-binding protein 2 OS=Mus musculus OX=10090 GN=Wbp2 PE=1 SV=1	9.30735	9.51303	9.33308	10.5489	9.83672	11.3732	633.566	730.647	644.966	1498.08	914.424	2652.62	0.396669	-1.33399	0.11732	0.93063
DNA replication licensing factor MCM2	Mcm2	sp|P97310|MCM2_MOUSE DNA replication licensing factor MCM2 OS=Mus musculus OX=10090 GN=Mcm2 PE=1 SV=3	15.0444	14.051	13.7133	13.2416	13.1581	12.9396	33792.1	16973.5	13431.2	9685.43	9140.77	7856.11	2.40597	1.26662	0.118298	0.927022
Proliferation-associated protein 2G4	Pa2g4	sp|P50580|PA2G4_MOUSE Proliferation-associated protein 2G4 OS=Mus musculus OX=10090 GN=Pa2g4 PE=1 SV=3	15.9297	15.0015	14.771	14.0852	14.3567	14.3184	62419.1	32802.1	27958.5	17380.7	20979.6	20430	2.09524	1.06711	0.118523	0.926197
Neuromodulin	Gap43	sp|P06837|NEUM_MOUSE Neuromodulin OS=Mus musculus OX=10090 GN=Gap43 PE=1 SV=1	10.8702	10.7397	11.6065	12.5038	11.6303	11.7286	1871.79	1709.9	3118.2	5807.9	3170.07	3393.6	0.541556	-0.884818	0.118715	0.925493
F-box only protein 2	Fbxo2	sp|Q80UW2|FBX2_MOUSE F-box only protein 2 OS=Mus musculus OX=10090 GN=Fbxo2 PE=1 SV=1	12.7605	12.5963	13.0038	12.9877	13.0137	13.0563	6938.94	6192.47	8213.61	8122.45	8270.16	8518.01	0.856864	-0.222862	0.119234	0.9236
E3 ubiquitin-protein ligase pellino homolog 1	Peli1	sp|Q8C669|PELI1_MOUSE E3 ubiquitin-protein ligase pellino homolog 1 OS=Mus musculus OX=10090 GN=Peli1 PE=1 SV=2	13.8678	13.9474	13.6125	14.4978	15.0044	13.9905	14949.4	15797.4	12524.8	23135.2	32868.1	16276.5	0.598669	-0.74017	0.120393	0.9194
Band 4.1-like protein 3;Band 4.1-like protein 3, N-terminally processed;Band 4.1-like protein 2	Epb41l3;Epb41l2;Epb4.1l2;Epb4.1l3	sp|Q9WV92|E41L3_MOUSE Band 4.1-like protein 3 OS=Mus musculus OX=10090 GN=Epb41l3 PE=1 SV=1;sp|O70318|E41L2_MOUSE Band 4.1-like protein 2 OS=Mus musculus OX=10090 GN=Epb41l2 PE=1 SV=2;tr|Q80UE5|Q80UE5_MOUSE Band 4.1-like protein 2 OS=Mus musculus OX=10090	11.9759	12.5319	12.6291	12.5812	13.1132	12.879	4028.15	5922.13	6334.87	6128	8860.67	7532.95	0.723089	-0.467754	0.121785	0.914408
Sodium/potassium-transporting ATPase subunit beta-3	Atp1b3	sp|P97370|AT1B3_MOUSE Sodium/potassium-transporting ATPase subunit beta-3 OS=Mus musculus OX=10090 GN=Atp1b3 PE=1 SV=1	12.1166	13.2063	12.7743	13.1149	13.3624	13.3707	4440.79	9451.32	7005.63	8871.12	10531.3	10592.1	0.696718	-0.521353	0.122521	0.91179
Acyl-coenzyme A thioesterase 1;Acyl-coenzyme A thioesterase 2, mitochondrial	Acot1;Acot2	sp|O55137|ACOT1_MOUSE Acyl-coenzyme A thioesterase 1 OS=Mus musculus OX=10090 GN=Acot1 PE=1 SV=1;sp|Q9QYR9|ACOT2_MOUSE Acyl-coenzyme A thioesterase 2, mitochondrial OS=Mus musculus OX=10090 GN=Acot2 PE=1 SV=2	13.6669	13.3181	13.6662	14.3014	13.6833	13.9675	13006.1	10212.9	12999.8	20190.7	13154.8	16019	0.7337	-0.446737	0.122633	0.911393
Polypyrimidine tract-binding protein 2	Ptbp2	sp|Q91Z31|PTBP2_MOUSE Polypyrimidine tract-binding protein 2 OS=Mus musculus OX=10090 GN=Ptbp2 PE=1 SV=2	10.9165	10.8881	10.9366	11.8013	11.3157	11.069	1932.83	1895.15	1959.95	3568.99	2548.97	2148.33	0.700185	-0.514192	0.122741	0.911009
Dynamin-1-like protein	Dnm1l	sp|Q8K1M6|DNM1L_MOUSE Dynamin-1-like protein OS=Mus musculus OX=10090 GN=Dnm1l PE=1 SV=2;tr|E9PUD2|E9PUD2_MOUSE Dynamin-1-like protein OS=Mus musculus OX=10090 GN=Dnm1l PE=1 SV=1	13.9574	13.0648	12.9892	12.7128	12.3998	12.4317	15907.3	8568.34	8130.9	6713.27	5403.96	5524.78	1.84823	0.886147	0.122818	0.910738
Glyoxylate reductase/hydroxypyruvate reductase	Grhpr	sp|Q91Z53|GRHPR_MOUSE Glyoxylate reductase/hydroxypyruvate reductase OS=Mus musculus OX=10090 GN=Grhpr PE=1 SV=1;tr|D6REG4|D6REG4_MOUSE Glyoxylate reductase/hydroxypyruvate reductase OS=Mus musculus OX=10090 GN=Grhpr PE=1 SV=1	13.8006	12.8249	12.5455	12.1915	11.776	12.0067	14269	7255.7	5978.22	4677.43	3506.95	4115.07	2.23611	1.16099	0.122998	0.910101
26S proteasome non-ATPase regulatory subunit 3	Psmd3	sp|P14685|PSMD3_MOUSE 26S proteasome non-ATPase regulatory subunit 3 OS=Mus musculus OX=10090 GN=Psmd3 PE=1 SV=3	16.4213	15.3918	15.2624	14.7075	14.875	14.3778	87761.5	42992.6	39304.3	26754.6	30048.4	21288.7	2.17768	1.12279	0.124033	0.906462
DDB1- and CUL4-associated factor 7	Dcaf7	sp|P61963|DCAF7_MOUSE DDB1- and CUL4-associated factor 7 OS=Mus musculus OX=10090 GN=Dcaf7 PE=1 SV=1	12.8586	12.2574	12.2005	12.1229	11.3313	11.942	7427.19	4896.04	4706.7	4460.22	2576.68	3934.6	1.5522	0.634311	0.124424	0.905097
Bone morphogenetic protein 1	Bmp1	sp|P98063|BMP1_MOUSE Bone morphogenetic protein 1 OS=Mus musculus OX=10090 GN=Bmp1 PE=1 SV=2	12.8585	12.8621	12.3617	12.5016	12.19	12.3011	7426.67	7445.23	5263.11	5799.05	4672.57	5046.61	1.29751	0.375742	0.125493	0.901381
Eukaryotic translation initiation factor 3 subunit D	Eif3d	sp|O70194|EIF3D_MOUSE Eukaryotic translation initiation factor 3 subunit D OS=Mus musculus OX=10090 GN=Eif3d PE=1 SV=2	13.2346	13.4594	12.3967	12.6669	12.0675	12.1683	9638.55	11263.8	5392.36	6503.05	4292.2	4602.81	1.70766	0.772022	0.125788	0.900361
Guanine nucleotide-binding protein G(i) subunit alpha-2	Gnai2	sp|P08752|GNAI2_MOUSE Guanine nucleotide-binding protein G(i) subunit alpha-2 OS=Mus musculus OX=10090 GN=Gnai2 PE=1 SV=5;tr|A0A0A6YWA9|A0A0A6YWA9_MOUSE Guanine nucleotide-binding protein G(i) subunit alpha-2 (Fragment) OS=Mus musculus OX=10090 GN=Gnai2 PE	16.1029	16.9715	17.0589	17.0932	17.7365	17.2807	70381.1	128508	136534	139819	218383	159224	0.648253	-0.62537	0.126461	0.898045
E3 ubiquitin-protein ligase SMURF1;E3 ubiquitin-protein ligase SMURF2	Smurf1;Smurf2	sp|Q9CUN6|SMUF1_MOUSE E3 ubiquitin-protein ligase SMURF1 OS=Mus musculus OX=10090 GN=Smurf1 PE=1 SV=2;sp|A2A5Z6|SMUF2_MOUSE E3 ubiquitin-protein ligase SMURF2 OS=Mus musculus OX=10090 GN=Smurf2 PE=1 SV=1;tr|E9Q4K9|E9Q4K9_MOUSE E3 ubiquitin-protein ligase O	9.06266	9.91255	10.0271	10.7215	10.6897	9.84009	534.727	963.773	1043.42	1688.47	1651.66	916.563	0.597158	-0.743815	0.126517	0.89785
Aspartate--tRNA ligase, cytoplasmic	Dars	sp|Q922B2|SYDC_MOUSE Aspartate--tRNA ligase, cytoplasmic OS=Mus musculus OX=10090 GN=Dars1 PE=1 SV=2	16.2985	15.497	15.1027	15.0361	14.5742	14.49	80600.4	46244.7	35185.7	33598.3	24393.3	23010.4	2.00033	1.00024	0.127341	0.89503
Non-POU domain-containing octamer-binding protein	Nono	sp|Q99K48|NONO_MOUSE Non-POU domain-containing octamer-binding protein OS=Mus musculus OX=10090 GN=Nono PE=1 SV=3	16.5915	15.3923	14.6897	14.0872	13.6824	13.46	98750.5	43007.5	26426.5	17404.8	13146.6	11268.4	4.02164	2.00778	0.127419	0.894767
Signal recognition particle 9 kDa protein	Srp9	sp|P49962|SRP09_MOUSE Signal recognition particle 9 kDa protein OS=Mus musculus OX=10090 GN=Srp9 PE=1 SV=2	13.0242	12.9751	12.6206	13.487	13.8579	14.9084	8330.57	8051.82	6297.66	11481.3	14847.2	30752.2	0.397334	-1.33158	0.127472	0.894585
26S protease regulatory subunit 8	Psmc5	sp|P62196|PRS8_MOUSE 26S proteasome regulatory subunit 8 OS=Mus musculus OX=10090 GN=Psmc5 PE=1 SV=1;tr|Q8K1K2|Q8K1K2_MOUSE 26S proteasome regulatory subunit 8 OS=Mus musculus OX=10090 GN=Psmc5 PE=1 SV=1	15.1783	14.044	13.8046	13.3714	12.8332	13.1137	37078.6	16891.4	14308.7	10597.2	7297.57	8863.74	2.55166	1.35144	0.129331	0.888297
Platelet-activating factor acetylhydrolase	Pla2g7	sp|Q60963|PAFA_MOUSE Platelet-activating factor acetylhydrolase OS=Mus musculus OX=10090 GN=Pla2g7 PE=1 SV=2;tr|E9Q330|E9Q330_MOUSE Platelet-activating factor acetylhydrolase (Fragment) OS=Mus musculus OX=10090 GN=Pla2g7 PE=1 SV=1	16.8292	16.0957	16.7997	16.1466	15.2157	16.2542	116438	70030.7	114081	72545.6	38052.4	78163.1	1.59222	0.671042	0.130372	0.884817
Protein arginine N-methyltransferase 1	Prmt1	sp|Q9JIF0|ANM1_MOUSE Protein arginine N-methyltransferase 1 OS=Mus musculus OX=10090 GN=Prmt1 PE=1 SV=1;tr|A0A171KXD3|A0A171KXD3_MOUSE Protein arginine N-methyltransferase 1 OS=Mus musculus OX=10090 GN=Prmt1 PE=1 SV=1;tr|A0A140LHF7|A0A140LHF7_MOUSE Protein	15.6503	15.4468	14.5998	14.6324	14.6948	14.5031	51429.2	44663.2	24830.1	25397.5	26520.1	23220.3	1.60934	0.686469	0.130508	0.884361
Podocan	Podn	sp|Q7TQ62|PODN_MOUSE Podocan OS=Mus musculus OX=10090 GN=Podn PE=2 SV=1	12.5395	11.8466	11.6489	11.3148	11.537	11.2375	5953.41	3682.83	3211.21	2547.38	2971.55	2414.49	1.61941	0.695467	0.13053	0.88429
Phenylalanine--tRNA ligase alpha subunit	Farsa	sp|Q8C0C7|SYFA_MOUSE Phenylalanine--tRNA ligase alpha subunit OS=Mus musculus OX=10090 GN=Farsa PE=1 SV=1;tr|E9PWY9|E9PWY9_MOUSE Phenylalanine--tRNA ligase alpha subunit OS=Mus musculus OX=10090 GN=Farsa PE=1 SV=1	13.6268	13.0437	12.1462	11.8217	12.2777	11.7547	12649.6	8443.94	4532.84	3619.81	4965.42	3455.55	2.12829	1.0897	0.131255	0.881883
WD repeat-containing protein 82	Wdr82	sp|Q8BFQ4|WDR82_MOUSE WD repeat-containing protein 82 OS=Mus musculus OX=10090 GN=Wdr82 PE=1 SV=1	12.8503	12.7061	11.7745	11.4138	12.0943	11.6198	7384.58	6682.17	3503.3	2728.33	4372.67	3147.08	1.71447	0.777764	0.131883	0.879813
DNA damage-binding protein 1	Ddb1	sp|Q3U1J4|DDB1_MOUSE DNA damage-binding protein 1 OS=Mus musculus OX=10090 GN=Ddb1 PE=1 SV=2;tr|A0A494BAF6|A0A494BAF6_MOUSE DNA damage-binding protein 1 (Fragment) OS=Mus musculus OX=10090 GN=Ddb1 PE=1 SV=1	12.8203	13.2603	12.8362	11.4361	12.8205	12.4534	7232.61	9811.79	7312.76	2770.83	7233.61	5608.5	1.56006	0.641603	0.134106	0.872552
rRNA 2-O-methyltransferase fibrillarin;rRNA/tRNA 2-O-methyltransferase fibrillarin-like protein 1	Fbl;Fbll1	sp|P35550|FBRL_MOUSE rRNA 2-O-methyltransferase fibrillarin OS=Mus musculus OX=10090 GN=Fbl PE=1 SV=2;sp|Q80WS3|FBLL1_MOUSE rRNA/tRNA 2-O-methyltransferase fibrillarin-like protein 1 OS=Mus musculus OX=10090 GN=Fbll1 PE=1 SV=1	14.0484	13.4432	12.8114	12.7176	12.8571	12.0845	16943	11138	7188.13	6735.64	7419.47	4343.07	1.90662	0.931021	0.134149	0.872412
40S ribosomal protein S10	Rps10	sp|P63325|RS10_MOUSE 40S ribosomal protein S10 OS=Mus musculus OX=10090 GN=Rps10 PE=1 SV=1	15.9552	15.0307	14.7981	14.6434	14.2885	14.0313	63532.2	33472.8	28488.7	25591.9	20010.9	16743.3	2.01285	1.00924	0.134571	0.871049
Protein ITFG3	Itfg3	sp|Q8C0Z1|F234A_MOUSE Protein FAM234A OS=Mus musculus OX=10090 GN=Fam234a PE=1 SV=1;tr|F6SQM4|F6SQM4_MOUSE Protein FAM234A OS=Mus musculus OX=10090 GN=Fam234a PE=1 SV=2	12.9249	12.863	13.7414	13.758	13.7803	13.6267	7776.47	7449.87	13695.4	13853.9	14069.7	12648.7	0.712845	-0.488339	0.134893	0.870009
P2X purinoceptor 7;P2X purinoceptor	P2rx7	sp|Q9Z1M0|P2RX7_MOUSE P2X purinoceptor 7 OS=Mus musculus OX=10090 GN=P2rx7 PE=1 SV=2;tr|C8YIX4|C8YIX4_MOUSE P2X purinoceptor OS=Mus musculus OX=10090 GN=P2rx7 PE=1 SV=1;tr|Q3UN00|Q3UN00_MOUSE P2X purinoceptor OS=Mus musculus OX=10090 GN=P2rx7 PE=1 SV=1;tr|	11.0224	11.6377	12.5954	12.8107	12.8119	12.2994	2080.05	3186.37	6188.61	7184.64	7190.62	5040.67	0.589981	-0.761259	0.135192	0.869049
Retinoic acid early-inducible protein 1-epsilon	Raet1e	sp|Q9CZQ6|RAE1E_MOUSE Retinoic acid early-inducible protein 1-epsilon OS=Mus musculus OX=10090 GN=Raet1e PE=1 SV=1;tr|M0QWQ3|M0QWQ3_MOUSE Retinoic acid early-inducible protein 1-epsilon (Fragment) OS=Mus musculus OX=10090 GN=Raet1e PE=4 SV=1	12.0735	11.3024	11.9267	12.34	12.2899	12	4310.08	2525.58	3893.09	5184.54	5007.59	4096	0.750886	-0.413334	0.135429	0.86829
Transportin-1	Tnpo1	sp|Q8BFY9|TNPO1_MOUSE Transportin-1 OS=Mus musculus OX=10090 GN=Tnpo1 PE=1 SV=2;tr|Q3TKD0|Q3TKD0_MOUSE Transportin-1 (Fragment) OS=Mus musculus OX=10090 GN=Tnpo1 PE=1 SV=1	14.5806	14.6722	14.3015	14.4206	13.9565	14.2232	24501.8	26107.9	20192.1	21929.7	15897.4	19125.4	1.24317	0.314027	0.136325	0.865425
Unconventional myosin-Ie	Myo1e	sp|E9Q634|MYO1E_MOUSE Unconventional myosin-Ie OS=Mus musculus OX=10090 GN=Myo1e PE=1 SV=1	13.2033	13.6757	13.0789	13.7863	13.4947	14.0387	9431.69	13085.7	8652.49	14128.3	11542.8	16829.4	0.7334	-0.447329	0.139011	0.856951
Alanine--tRNA ligase, cytoplasmic	Aars	sp|Q8BGQ7|SYAC_MOUSE Alanine--tRNA ligase, cytoplasmic OS=Mus musculus OX=10090 GN=Aars1 PE=1 SV=1	14.5805	13.5111	13.4265	12.8075	12.8012	13.0497	24500.1	11674.7	11009.8	7168.72	7137.48	8479.13	2.07083	1.05021	0.139072	0.856759
Anoctamin-6	Ano6	sp|Q6P9J9|ANO6_MOUSE Anoctamin-6 OS=Mus musculus OX=10090 GN=Ano6 PE=1 SV=1;tr|A0A2I3BPY8|A0A2I3BPY8_MOUSE Anoctamin OS=Mus musculus OX=10090 GN=Ano6 PE=1 SV=1;tr|A0A2I3BPX3|A0A2I3BPX3_MOUSE Anoctamin OS=Mus musculus OX=10090 GN=Ano6 PE=1 SV=1	10.8131	10.2647	11.5208	11.5496	11.8295	11.3344	1799.15	1230.22	2938.37	2997.62	3639.44	2582.23	0.647311	-0.62747	0.1395	0.855426
Protein transport protein Sec23A	Sec23a	sp|Q01405|SC23A_MOUSE Protein transport protein Sec23A OS=Mus musculus OX=10090 GN=Sec23a PE=1 SV=2;tr|E9Q1S3|E9Q1S3_MOUSE Protein transport protein SEC23 OS=Mus musculus OX=10090 GN=Sec23a PE=1 SV=1	12.4903	12.6909	12.0678	12.3209	11.5091	11.7176	5753.8	6612.13	4293.09	5116.35	2914.64	3367.82	1.46147	0.547421	0.139718	0.854749
60S ribosomal protein L34	Rpl34	sp|Q9D1R9|RL34_MOUSE 60S ribosomal protein L34 OS=Mus musculus OX=10090 GN=Rpl34 PE=1 SV=2	12.7148	12.4631	13.8849	11.9221	11.7688	11.8147	6722.58	5646.34	15127.6	3880.7	3489.49	3602.29	2.50596	1.32536	0.140192	0.853275
WD repeat domain phosphoinositide-interacting protein 2	Wipi2	sp|Q80W47|WIPI2_MOUSE WD repeat domain phosphoinositide-interacting protein 2 OS=Mus musculus OX=10090 GN=Wipi2 PE=1 SV=1;tr|D3YWK1|D3YWK1_MOUSE WD repeat domain phosphoinositide-interacting protein 2 OS=Mus musculus OX=10090 GN=Wipi2 PE=1 SV=1	12.5069	11.2943	11.0842	8.92388	10.8678	10.4211	5820.39	2511.44	2171.08	485.686	1868.68	1371.08	2.81924	1.49531	0.140649	0.851864
Transitional endoplasmic reticulum ATPase	Vcp	sp|Q01853|TERA_MOUSE Transitional endoplasmic reticulum ATPase OS=Mus musculus OX=10090 GN=Vcp PE=1 SV=4	17.7073	19.3331	18.224	17.366	16.9084	17.0619	214007	660455	306176	168922	123009	136818	2.75368	1.46136	0.140796	0.851411
Tropomyosin alpha-3 chain	Tpm3;Tpm3-rs7	tr|D3Z6I8|D3Z6I8_MOUSE Tropomyosin alpha-3 chain OS=Mus musculus OX=10090 GN=Tpm3 PE=1 SV=1;tr|E9Q7Q3|E9Q7Q3_MOUSE Tropomyosin alpha-3 chain OS=Mus musculus OX=10090 GN=Tpm3 PE=1 SV=1;tr|D3Z2H9|D3Z2H9_MOUSE Tropomyosin 3, related sequence 7 OS=Mus musculus	11.9155	12.3273	12.5923	12.0402	11.8988	11.4859	3862.98	5139.1	6175.33	4211.74	3818.53	2868.14	1.39263	0.477809	0.140917	0.851035
Malate dehydrogenase, mitochondrial	Mdh2	sp|P08249|MDHM_MOUSE Malate dehydrogenase, mitochondrial OS=Mus musculus OX=10090 GN=Mdh2 PE=1 SV=3;tr|A0A0G2JF23|A0A0G2JF23_MOUSE Malate dehydrogenase (Fragment) OS=Mus musculus OX=10090 GN=Mdh2 PE=1 SV=1	12.6804	11.8507	11.3897	11.2277	11.192	10.7463	6564.18	3693.31	2683.13	2398.14	2339.53	1717.74	2.00462	1.00333	0.141588	0.848972
Calcium/calmodulin-dependent protein kinase type II subunit alpha;Calcium/calmodulin-dependent protein kinase type II subunit beta;Calcium/calmodulin-dependent protein kinase type II subunit gamma;Calcium/calmodulin-dependent protein kinase type II subunit delta	Camk2a;Camk2b;Camk2d;Camk2g	sp|P11798|KCC2A_MOUSE Calcium/calmodulin-dependent protein kinase type II subunit alpha OS=Mus musculus OX=10090 GN=Camk2a PE=1 SV=2;sp|P28652|KCC2B_MOUSE Calcium/calmodulin-dependent protein kinase type II subunit beta OS=Mus musculus OX=10090 GN=Camk2b P	13.4705	13.0902	13.1729	12.1044	13.1896	12.6825	11350.7	8720.53	9235.02	4403.39	9342.55	6573.75	1.44226	0.528333	0.141851	0.848168
40S ribosomal protein S26	Rps26	sp|P62855|RS26_MOUSE 40S ribosomal protein S26 OS=Mus musculus OX=10090 GN=Rps26 PE=1 SV=3	14.3703	13.5522	15.0948	13.5093	13.619	12.5075	21178.3	12012.1	34993.5	11660.2	12581.4	5822.81	2.26793	1.18138	0.143952	0.841781
Pyrroline-5-carboxylate reductase 3	Pycrl	sp|Q9DCC4|P5CR3_MOUSE Pyrroline-5-carboxylate reductase 3 OS=Mus musculus OX=10090 GN=Pycr3 PE=1 SV=2	10.1628	9.79463	9.89464	9.65439	9.85771	9.42219	1146.32	888.132	951.883	805.863	927.826	686.06	1.23415	0.303521	0.144729	0.839446
Transcription intermediary factor 1-beta	Trim28	sp|Q62318|TIF1B_MOUSE Transcription intermediary factor 1-beta OS=Mus musculus OX=10090 GN=Trim28 PE=1 SV=3	14.0158	12.5329	13.2402	11.8748	12.4585	12.4404	16564.4	5926.23	9676.03	3755.53	5628.36	5558.19	2.15276	1.10619	0.144817	0.839179
Tissue-type plasminogen activator;Tissue-type plasminogen activator chain A;Tissue-type plasminogen activator chain B	Plat	sp|P11214|TPA_MOUSE Tissue-type plasminogen activator OS=Mus musculus OX=10090 GN=Plat PE=1 SV=3	11.5304	10.9506	9.74356	9.68155	8.96315	10.0605	2957.99	1979.06	857.243	821.177	499.088	1067.85	2.4263	1.27876	0.145302	0.837728
Ras GTPase-activating protein 3	Rasa3	sp|Q60790|RASA3_MOUSE Ras GTPase-activating protein 3 OS=Mus musculus OX=10090 GN=Rasa3 PE=1 SV=2	13.044	12.667	13.2907	13.53	13.2981	13.2365	8445.69	6503.5	10020.7	11828.7	10072.3	9651.25	0.791385	-0.337548	0.145566	0.836941
Calmodulin-like protein 3	Calm1;Calml3	sp|P0DP28|CALM3_MOUSE Calmodulin-3 OS=Mus musculus OX=10090 GN=Calm3 PE=1 SV=1;sp|P0DP27|CALM2_MOUSE Calmodulin-2 OS=Mus musculus OX=10090 GN=Calm2 PE=1 SV=1;sp|P0DP26|CALM1_MOUSE Calmodulin-1 OS=Mus musculus OX=10090 GN=Calm1 PE=1 SV=1;tr|Q3UKW2|Q3UKW2_MO	16.8551	17.5481	17.6155	17.9353	18.0788	17.5053	118547	191648	200814	250647	276861	186046	0.716146	-0.481674	0.146115	0.835305
Pre-mRNA-splicing factor ATP-dependent RNA helicase DHX15	Dhx15	sp|O35286|DHX15_MOUSE Pre-mRNA-splicing factor ATP-dependent RNA helicase DHX15 OS=Mus musculus OX=10090 GN=Dhx15 PE=1 SV=2;tr|A0A0G2JG10|A0A0G2JG10_MOUSE Pre-mRNA-splicing factor ATP-dependent RNA helicase DHX15 OS=Mus musculus OX=10090 GN=Dhx15 PE=1 SV=1	15.6511	15.075	14.052	13.9496	13.5315	14.2989	51457.7	34516.5	16985.3	15821.5	11841	20155.7	2.15315	1.10645	0.147018	0.83263
Staphylococcal nuclease domain-containing protein 1	Snd1	sp|Q78PY7|SND1_MOUSE Staphylococcal nuclease domain-containing protein 1 OS=Mus musculus OX=10090 GN=Snd1 PE=1 SV=1;tr|Q3TJ56|Q3TJ56_MOUSE Staphylococcal nuclease domain-containing protein 1 OS=Mus musculus OX=10090 GN=Snd1 PE=1 SV=1	16.2704	15.147	14.7307	14.3535	14.1412	14.0996	79045.7	36282.8	27188.3	20933.1	18068.6	17555.1	2.51989	1.33336	0.148223	0.829085
PAB-dependent poly(A)-specific ribonuclease subunit PAN3	Pan3	sp|Q640Q5|PAN3_MOUSE PAN2-PAN3 deadenylation complex subunit Pan3 OS=Mus musculus OX=10090 GN=Pan3 PE=1 SV=3;tr|H3BJH6|H3BJH6_MOUSE PAN2-PAN3 deadenylation complex subunit Pan3 (Fragment) OS=Mus musculus OX=10090 GN=Pan3 PE=1 SV=1;tr|H3BKF3|H3BKF3_MOUSE PA	12.242	13.5735	13.1726	13.6038	13.4856	13.8901	4844.06	12190.8	9233.1	12449.5	11470.2	15182.3	0.67178	-0.573939	0.150013	0.823871
Vinculin	Vcl	sp|Q64727|VINC_MOUSE Vinculin OS=Mus musculus OX=10090 GN=Vcl PE=1 SV=4	14.1477	13.941	14.5612	14.7726	14.5901	14.4127	18150.2	15727.5	24174.5	27989.5	24663.7	21810	0.77961	-0.359176	0.150508	0.822439
Actin-related protein 2/3 complex subunit 2	Arpc2	sp|Q9CVB6|ARPC2_MOUSE Actin-related protein 2/3 complex subunit 2 OS=Mus musculus OX=10090 GN=Arpc2 PE=1 SV=3;tr|D3YXG6|D3YXG6_MOUSE Arp2/3 complex 34 kDa subunit OS=Mus musculus OX=10090 GN=Arpc2 PE=1 SV=1	14.1933	14.7806	14.2673	14.7459	14.7062	15.2646	18733.1	28145.2	19719	27476.3	26730.5	39364.3	0.711729	-0.4906	0.150621	0.822114
Heterogeneous nuclear ribonucleoprotein K	Hnrnpk	sp|P61979|HNRPK_MOUSE Heterogeneous nuclear ribonucleoprotein K OS=Mus musculus OX=10090 GN=Hnrnpk PE=1 SV=1;tr|H3BKD0|H3BKD0_MOUSE Heterogeneous nuclear ribonucleoprotein K (Fragment) OS=Mus musculus OX=10090 GN=Hnrnpk PE=1 SV=1;tr|B2M1R6|B2M1R6_MOUSE Het	16.2172	15.9374	15.488	15.5952	15.402	15.4421	76184	62753.1	45957.1	49502	43297.6	44518	1.34647	0.429183	0.151004	0.821012
DNA-directed RNA polymerase II subunit RPB1	Polr2a	sp|P08775|RPB1_MOUSE DNA-directed RNA polymerase II subunit RPB1 OS=Mus musculus OX=10090 GN=Polr2a PE=1 SV=3;tr|A0A0R4J0V5|A0A0R4J0V5_MOUSE DNA-directed RNA polymerase subunit OS=Mus musculus OX=10090 GN=Polr2a PE=1 SV=1	13.2008	12.6124	11.6675	11.8048	9.62856	11.8911	9415.36	6261.97	3252.88	3577.66	791.563	3798.2	2.31777	1.21274	0.151178	0.82051
WD repeat domain phosphoinositide-interacting protein 3	Wdr45b	sp|Q9CR39|WIPI3_MOUSE WD repeat domain phosphoinositide-interacting protein 3 OS=Mus musculus OX=10090 GN=Wdr45b PE=1 SV=2	10.9035	10.373	10.3169	11.1896	10.6282	11.5127	1915.49	1326.12	1275.55	2335.64	1582.73	2921.92	0.660377	-0.598639	0.152263	0.817407
Protein FAM63A	Fam63a	sp|Q76LS9|MINY1_MOUSE Ubiquitin carboxyl-terminal hydrolase MINDY-1 OS=Mus musculus OX=10090 GN=Mindy1 PE=1 SV=1	12.3336	11.2436	11.8528	12.6635	12.5509	12.0617	5161.59	2424.72	3698.69	6487.74	6000.64	4274.97	0.673195	-0.570904	0.153114	0.814986
Sodium/potassium-transporting ATPase subunit beta-2	Atp1b2	sp|P14231|AT1B2_MOUSE Sodium/potassium-transporting ATPase subunit beta-2 OS=Mus musculus OX=10090 GN=Atp1b2 PE=1 SV=2;tr|I7HIF3|I7HIF3_MOUSE ATPase, Na+/K+ transporting, beta 2 polypeptide (Fragment) OS=Mus musculus OX=10090 GN=Atp1b2 PE=1 SV=1	14.0417	14.447	15.1581	14.8615	15.9514	15.3802	16864.5	22334.7	36563.1	29768.5	63365.1	42648.3	0.55797	-0.841739	0.154453	0.811202
Proteasome activator complex subunit 4	Psme4	sp|Q5SSW2|PSME4_MOUSE Proteasome activator complex subunit 4 OS=Mus musculus OX=10090 GN=Psme4 PE=1 SV=1	12.3313	10.8135	11.1636	10.0439	10.6411	9.98378	5153.37	1799.65	2293.92	1055.64	1596.95	1012.55	2.52295	1.33511	0.154685	0.810552
SH3 domain-binding protein 4	Sh3bp4	sp|Q921I6|SH3B4_MOUSE SH3 domain-binding protein 4 OS=Mus musculus OX=10090 GN=Sh3bp4 PE=1 SV=1	13.22	12.9307	13.6878	14.0958	13.8656	13.4306	9541.5	7807.8	13195.9	17508.9	14926.6	11041.1	0.702565	-0.509296	0.1547	0.81051
Transcriptional activator protein Pur-beta	Purb	sp|O35295|PURB_MOUSE Transcriptional activator protein Pur-beta OS=Mus musculus OX=10090 GN=Purb PE=1 SV=3	11.7682	11.2353	12.5607	12.404	12.7642	12.4806	3488.04	2410.81	6041.54	5419.71	6956.76	5715.25	0.659992	-0.59948	0.155932	0.807064
Twinfilin-1	Twf1	sp|Q91YR1|TWF1_MOUSE Twinfilin-1 OS=Mus musculus OX=10090 GN=Twf1 PE=1 SV=2	12.0638	11.2891	11.9474	12.1426	12.3099	12.0563	4281.2	2502.41	3949.35	4521.54	5077.49	4259	0.774493	-0.368675	0.155957	0.806994
Repulsive guidance molecule A	Rgma	tr|Q8C4C4|Q8C4C4_MOUSE Repulsive guidance molecule A OS=Mus musculus OX=10090 GN=Rgma PE=1 SV=1;sp|Q6PCX7|RGMA_MOUSE Repulsive guidance molecule A OS=Mus musculus OX=10090 GN=Rgma PE=1 SV=1	9.24016	9.45913	9.96378	10.9966	10.1164	9.96085	604.735	703.853	998.612	2043.18	1110.04	996.586	0.555977	-0.846902	0.155983	0.806924
Mannose-1-phosphate guanyltransferase alpha	Gmppa	sp|Q922H4|GMPPA_MOUSE Mannose-1-phosphate guanyltransferase alpha OS=Mus musculus OX=10090 GN=Gmppa PE=1 SV=1	11.4768	10.4325	10.3994	10.1418	9.26833	10.1086	2850.11	1381.96	1350.61	1129.76	616.659	1104.06	1.95851	0.969755	0.156033	0.806783
Calpain-2 catalytic subunit	Capn2	sp|O08529|CAN2_MOUSE Calpain-2 catalytic subunit OS=Mus musculus OX=10090 GN=Capn2 PE=1 SV=4	12.6465	12.6963	12.6419	12.3343	12.4405	12.6754	6411.74	6636.93	6391.33	5164.1	5558.58	6541.47	1.12603	0.171249	0.156985	0.804142
Ferritin light chain 1;Ferritin;Ferritin light chain 2	Ftl1;Ftl2	sp|P29391|FRIL1_MOUSE Ferritin light chain 1 OS=Mus musculus OX=10090 GN=Ftl1 PE=1 SV=2;tr|Q9CPX4|Q9CPX4_MOUSE Ferritin OS=Mus musculus OX=10090 GN=Ftl1 PE=1 SV=1;tr|A0A1B0GR60|A0A1B0GR60_MOUSE Ferritin OS=Mus musculus OX=10090 GN=Ftl1 PE=1 SV=1;tr|A0A1B0G	15.0814	14.9562	15.1897	15.0942	14.5638	14.3234	34670	31788.1	37372.8	34979	24218.1	20500.9	1.3028	0.38162	0.157377	0.803058
Collagen alpha-1(IV) chain;Arresten	Col4a5;Col4a1	tr|Q63ZW6|Q63ZW6_MOUSE Col4a5 protein OS=Mus musculus OX=10090 GN=Col4a5 PE=1 SV=1;tr|F7CK55|F7CK55_MOUSE Collagen, type IV, alpha 5 (Fragment) OS=Mus musculus OX=10090 GN=Col4a5 PE=1 SV=1;sp|P02463|CO4A1_MOUSE Collagen alpha-1(IV) chain OS=Mus musculus OX	13.5436	14.4203	14.5191	13.284	13.1232	13.9848	11940.7	21925.2	23479.3	9974.3	8922.3	16212.3	1.63335	0.707835	0.157705	0.802155
LanC-like protein 1	Lancl1	sp|O89112|LANC1_MOUSE Glutathione S-transferase LANCL1 OS=Mus musculus OX=10090 GN=Lancl1 PE=1 SV=1;tr|B2KGR2|B2KGR2_MOUSE Glutathione S-transferase LANCL1 (Fragment) OS=Mus musculus OX=10090 GN=Lancl1 PE=1 SV=1	10.9496	10.8897	10.6605	10.3781	10.8311	10.3133	1977.69	1897.26	1618.57	1330.82	1821.74	1272.37	1.24149	0.312075	0.157898	0.801622
Disco-interacting protein 2 homolog A	Dip2a	sp|Q8BWT5|DIP2A_MOUSE Disco-interacting protein 2 homolog A OS=Mus musculus OX=10090 GN=Dip2a PE=1 SV=3;tr|D3Z7D3|D3Z7D3_MOUSE Disco-interacting protein 2 homolog A OS=Mus musculus OX=10090 GN=Dip2a PE=1 SV=1;tr|F8WI56|F8WI56_MOUSE Disco-interacting protei	13.312	12.9226	13.2416	13.5092	13.3078	13.3384	10169.8	7764.08	9685.43	11659.4	10140.2	10357.6	0.858885	-0.219463	0.158711	0.799393
4F2 cell-surface antigen heavy chain	Slc3a2	sp|P10852|4F2_MOUSE 4F2 cell-surface antigen heavy chain OS=Mus musculus OX=10090 GN=Slc3a2 PE=1 SV=1;tr|A0A0U1RPK4|A0A0U1RPK4_MOUSE 4F2 cell-surface antigen heavy chain OS=Mus musculus OX=10090 GN=Slc3a2 PE=1 SV=1	16.3671	16.9036	17.6355	17.3405	18.1656	17.7174	84525.6	122600	203617	165963	294029	215511	0.608055	-0.717726	0.159965	0.795976
Abl interactor 2;Abl interactor 1	Abi2;Abi1	sp|P62484|ABI2_MOUSE Abl interactor 2 OS=Mus musculus OX=10090 GN=Abi2 PE=1 SV=1;tr|A0A087WR90|A0A087WR90_MOUSE Abl interactor 2 (Fragment) OS=Mus musculus OX=10090 GN=Abi2 PE=1 SV=6;tr|A0A087WNT3|A0A087WNT3_MOUSE Abl interactor 2 (Fragment) OS=Mus musculu	10.2537	10.6894	10.9482	10.6522	9.16214	8.93863	1220.88	1651.32	1975.77	1609.28	572.9	490.677	1.81377	0.858995	0.160254	0.795192
Bone morphogenetic protein receptor type-1A;Receptor protein serine/threonine kinase	Bmpr1a	sp|P36895|BMR1A_MOUSE Bone morphogenetic protein receptor type-1A OS=Mus musculus OX=10090 GN=Bmpr1a PE=1 SV=1;tr|Q60607|Q60607_MOUSE Receptor protein serine/threonine kinase OS=Mus musculus OX=10090 GN=Bmpr1a PE=1 SV=1	10.2151	9.47756	9.97836	10.208	10.3039	10.9935	1188.64	712.902	1008.75	1182.81	1264.1	2038.79	0.648794	-0.624167	0.161302	0.792361
Coronin-1B	Coro1b	sp|Q9WUM3|COR1B_MOUSE Coronin-1B OS=Mus musculus OX=10090 GN=Coro1b PE=1 SV=1;tr|A0A494B9Y4|A0A494B9Y4_MOUSE Coronin (Fragment) OS=Mus musculus OX=10090 GN=Coro1b PE=1 SV=1	14.6782	13.6377	13.6112	13.3733	13.1974	12.9244	26216.7	12745.5	12513.5	10611.2	9393.19	7773.78	1.8531	0.889941	0.161322	0.792307
GMP synthase [glutamine-hydrolyzing]	Gmps	sp|Q3THK7|GUAA_MOUSE GMP synthase [glutamine-hydrolyzing] OS=Mus musculus OX=10090 GN=Gmps PE=1 SV=2	15.477	14.6657	14.1643	14.3899	13.6224	13.4174	45608	25990.6	18360.3	21468	12611	10940.6	1.99821	0.998712	0.162001	0.790483
ATP-dependent RNA helicase DDX1	Ddx1	sp|Q91VR5|DDX1_MOUSE ATP-dependent RNA helicase DDX1 OS=Mus musculus OX=10090 GN=Ddx1 PE=1 SV=1;tr|A0A1Y7VM48|A0A1Y7VM48_MOUSE ATP-dependent RNA helicase DDX1 (Fragment) OS=Mus musculus OX=10090 GN=Ddx1 PE=1 SV=1	14.0847	13.2152	13.2449	13.2172	12.5788	12.6826	17374.7	9509.8	9707.61	9523	6117.81	6574.2	1.64718	0.719998	0.162212	0.789917
Coronin-2B;Coronin	Coro2b	sp|Q8BH44|COR2B_MOUSE Coronin-2B OS=Mus musculus OX=10090 GN=Coro2b PE=1 SV=2;tr|G3V005|G3V005_MOUSE Coronin-2B (Fragment) OS=Mus musculus OX=10090 GN=Coro2b PE=1 SV=1;tr|G3UW48|G3UW48_MOUSE Coronin (Fragment) OS=Mus musculus OX=10090 GN=Coro2b PE=1 SV=1	13.6664	13.8741	12.4197	12.6916	12.2737	12.7234	13001.6	15014.8	5479.01	6615.34	4951.67	6762.78	1.82738	0.869774	0.162785	0.788387
Gamma-soluble NSF attachment protein	Napg	sp|Q9CWZ7|SNAG_MOUSE Gamma-soluble NSF attachment protein OS=Mus musculus OX=10090 GN=Napg PE=1 SV=1;tr|A0A494BA49|A0A494BA49_MOUSE Gamma-soluble NSF attachment protein OS=Mus musculus OX=10090 GN=Napg PE=1 SV=1;tr|A0A494BAX2|A0A494BAX2_MOUSE Gamma-soluble	10.7776	11.7535	11.7776	11.8399	11.901	12.0867	1755.42	3452.68	3510.84	3665.77	3824.35	4349.7	0.736408	-0.441423	0.16421	0.7846
Lipid phosphate phosphohydrolase 3	Ppap2b	sp|Q99JY8|PLPP3_MOUSE Phospholipid phosphatase 3 OS=Mus musculus OX=10090 GN=Plpp3 PE=1 SV=1	13.8093	14.249	14.2604	14.5646	15.266	14.3261	14355.3	19470.5	19624.9	24231.6	39402.5	20539.3	0.635008	-0.655154	0.164446	0.783977
60S ribosomal protein L9	Rpl9	sp|P51410|RL9_MOUSE 60S ribosomal protein L9 OS=Mus musculus OX=10090 GN=Rpl9 PE=2 SV=2;tr|D3YZT0|D3YZT0_MOUSE 60S ribosomal protein L9 OS=Mus musculus OX=10090 GN=Rpl9 PE=1 SV=2;tr|D3Z629|D3Z629_MOUSE 60S ribosomal protein L9 OS=Mus musculus OX=10090 GN=R	10.6398	10.1319	9.08999	9.09868	9.46524	8.62502	1595.51	1122.03	544.954	548.246	706.84	394.811	1.97739	0.983599	0.165017	0.782471
CAD protein;Glutamine-dependent carbamoyl-phosphate synthase;Aspartate carbamoyltransferase;Dihydroorotase	Cad	sp|B2RQC6|PYR1_MOUSE CAD protein OS=Mus musculus OX=10090 GN=Cad PE=1 SV=1;tr|E9QAI5|E9QAI5_MOUSE CAD protein OS=Mus musculus OX=10090 GN=Cad PE=1 SV=1;tr|G3UWN2|G3UWN2_MOUSE CAD protein OS=Mus musculus OX=10090 GN=Cad PE=1 SV=1	13.3216	13.3749	12.5006	12.583	12.7987	12.2624	10237.7	10623	5795.03	6135.65	7125.13	4913.04	1.46671	0.552581	0.166894	0.777559
Dual specificity mitogen-activated protein kinase kinase 1	Map2k1	sp|P31938|MP2K1_MOUSE Dual specificity mitogen-activated protein kinase kinase 1 OS=Mus musculus OX=10090 GN=Map2k1 PE=1 SV=2	12.2515	10.7287	11.4325	10.767	10.7224	10.0398	4876.06	1696.92	2763.92	1742.57	1689.52	1052.64	2.08193	1.05792	0.167336	0.77641
DNA replication licensing factor MCM7	Mcm7	sp|Q61881|MCM7_MOUSE DNA replication licensing factor MCM7 OS=Mus musculus OX=10090 GN=Mcm7 PE=1 SV=1;tr|D3Z6N3|D3Z6N3_MOUSE DNA replication licensing factor MCM7 OS=Mus musculus OX=10090 GN=Mcm7 PE=1 SV=1	13.5749	13.2006	12.6928	12.8019	12.7594	12.4926	12202.6	9414.05	6620.85	7140.95	6933.65	5762.98	1.42343	0.509375	0.168411	0.773629
Golgi phosphoprotein 3	Golph3	sp|Q9CRA5|GOLP3_MOUSE Golgi phosphoprotein 3 OS=Mus musculus OX=10090 GN=Golph3 PE=1 SV=1;tr|Q05BZ0|Q05BZ0_MOUSE Golgi phosphoprotein 3 OS=Mus musculus OX=10090 GN=Golph3 PE=1 SV=1	11.4212	12.0889	11.3115	11.4657	10.653	10.7395	2742.36	4356.34	2541.56	2828.26	1610.17	1709.67	1.56801	0.64893	0.169058	0.771965
MARCKS-related protein	Marcksl1	sp|P28667|MRP_MOUSE MARCKS-related protein OS=Mus musculus OX=10090 GN=Marcksl1 PE=1 SV=2	14.0063	14.5597	14.919	15.0798	15.0811	14.7192	16455.7	24149.4	30978.9	34631.6	34662.8	26972.5	0.7436	-0.427401	0.169346	0.771224
Acetyl-CoA carboxylase 1;Biotin carboxylase	Acaca	sp|Q5SWU9|ACACA_MOUSE Acetyl-CoA carboxylase 1 OS=Mus musculus OX=10090 GN=Acaca PE=1 SV=1	14.2055	13.5086	13.1054	13.1134	12.4142	13.1232	18892.2	11654.5	8812.89	8861.9	5458.16	8922.3	1.69344	0.759957	0.169663	0.770413
Sodium-coupled neutral amino acid transporter 1	Slc38a1	sp|Q8K2P7|S38A1_MOUSE Sodium-coupled neutral amino acid transporter 1 OS=Mus musculus OX=10090 GN=Slc38a1 PE=1 SV=1	11.9067	12.5706	12.4524	12.5943	13.4372	12.7191	3839.49	6083.14	5604.62	6183.89	11091.8	6742.65	0.646476	-0.629332	0.170206	0.769025
Serine/threonine-protein phosphatase 2A 56 kDa regulatory subunit epsilon isoform	Ppp2r5e;Ppp2r5b	tr|Q3UZJ4|Q3UZJ4_MOUSE Serine/threonine-protein phosphatase 2A 56 kDa regulatory subunit OS=Mus musculus OX=10090 GN=Ppp2r5e PE=1 SV=1;sp|Q61151|2A5E_MOUSE Serine/threonine-protein phosphatase 2A 56 kDa regulatory subunit epsilon isoform OS=Mus musculus OX	11.9832	11.2538	11.7885	11.3136	11.3856	11.2303	4048.58	2441.92	3537.46	2545.26	2675.51	2402.47	1.31545	0.395552	0.170555	0.768136
Plasminogen activator inhibitor 1 RNA-binding protein	Serbp1	sp|Q9CY58|PAIRB_MOUSE Plasminogen activator inhibitor 1 RNA-binding protein OS=Mus musculus OX=10090 GN=Serbp1 PE=1 SV=2;tr|A0A0N4SWH2|A0A0N4SWH2_MOUSE Plasminogen activator inhibitor 1 RNA-binding protein OS=Mus musculus OX=10090 GN=Serbp1 PE=1 SV=1;tr|A0	11.2436	10.9025	12.0142	12.5552	11.8901	11.8598	2424.72	1914.17	4136.51	6018.55	3795.57	3716.68	0.626378	-0.674894	0.170682	0.767812
ATP-binding cassette sub-family E member 1	Abce1	sp|P61222|ABCE1_MOUSE ATP-binding cassette sub-family E member 1 OS=Mus musculus OX=10090 GN=Abce1 PE=1 SV=1	14.2437	13.2994	13.1472	12.9971	12.8892	12.5681	19399.1	10081.3	9071.97	8175.55	7586.4	6072.61	1.76566	0.820207	0.171174	0.766562
Thioredoxin-like protein 1	Txnl1	sp|Q8CDN6|TXNL1_MOUSE Thioredoxin-like protein 1 OS=Mus musculus OX=10090 GN=Txnl1 PE=1 SV=3;tr|A0A498WGD8|A0A498WGD8_MOUSE Thioredoxin-like protein 1 OS=Mus musculus OX=10090 GN=Txnl1 PE=1 SV=1;tr|A0A494BBI1|A0A494BBI1_MOUSE Thioredoxin-like protein 1 OS=	13.422	12.5792	13.0646	12.3831	12.6053	12.727	10975.5	6119.51	8567.15	5341.76	6231.22	6779.67	1.39828	0.483654	0.171181	0.766545
Insulin-like growth factor-binding protein 5	Igfbp5	sp|Q07079|IBP5_MOUSE Insulin-like growth factor-binding protein 5 OS=Mus musculus OX=10090 GN=Igfbp5 PE=1 SV=1	10.1738	10.9646	10.3458	10.2601	8.49698	10.0039	1155.1	1998.36	1301.36	1226.3	361.282	1026.77	1.70398	0.768909	0.171621	0.765429
Lysine--tRNA ligase	Kars	sp|Q99MN1|SYK_MOUSE Lysine--tRNA ligase OS=Mus musculus OX=10090 GN=Kars1 PE=1 SV=1;tr|Q8R2P8|Q8R2P8_MOUSE Lysine--tRNA ligase OS=Mus musculus OX=10090 GN=Kars PE=1 SV=1	14.0555	14.0924	13.3306	13.6175	13.1649	13.3583	17026.6	17467.7	10301.7	12568.3	9183.96	10501.4	1.38886	0.473905	0.172334	0.763629
S-formylglutathione hydrolase	Esd	sp|Q9R0P3|ESTD_MOUSE S-formylglutathione hydrolase OS=Mus musculus OX=10090 GN=Esd PE=1 SV=1;tr|H3BK43|H3BK43_MOUSE S-formylglutathione hydrolase OS=Mus musculus OX=10090 GN=Esd PE=1 SV=1;tr|H3BLJ9|H3BLJ9_MOUSE S-formylglutathione hydrolase OS=Mus musculus	15.454	14.9692	14.0717	14.1086	14.009	14.2835	44886.7	32075.9	17218.8	17664.9	16486.5	19941.7	1.7411	0.799996	0.172607	0.762941
Arginine--tRNA ligase, cytoplasmic	Rars	sp|Q9D0I9|SYRC_MOUSE Arginine--tRNA ligase, cytoplasmic OS=Mus musculus OX=10090 GN=Rars1 PE=1 SV=2	11.3066	11.3421	10.6903	11.0939	10.2764	10.0237	2532.94	2596.05	1652.35	2185.73	1240.24	1040.96	1.51812	0.602286	0.173393	0.760968
Multivesicular body subunit 12B	Mvb12b	sp|Q6KAU4|MB12B_MOUSE Multivesicular body subunit 12B OS=Mus musculus OX=10090 GN=Mvb12b PE=1 SV=2;tr|A2ARF0|A2ARF0_MOUSE Multivesicular body subunit 12B (Fragment) OS=Mus musculus OX=10090 GN=Mvb12b PE=1 SV=1	15.127	16.3061	15.2099	16.082	16.1542	16.5715	35783.3	81026.2	37899.7	69368.8	72928.7	97390.9	0.645459	-0.631602	0.174369	0.758531
60S ribosomal protein L27	Rpl27	sp|P61358|RL27_MOUSE 60S ribosomal protein L27 OS=Mus musculus OX=10090 GN=Rpl27 PE=1 SV=2;tr|A2A4Q0|A2A4Q0_MOUSE 60S ribosomal protein L27 (Fragment) OS=Mus musculus OX=10090 GN=Rpl27 PE=1 SV=1	15.5221	14.8867	16.5601	14.9754	14.4562	14.1988	47056.3	30293.1	96624.4	32214	22477.6	18804.6	2.36711	1.24313	0.174503	0.758198
Actin-related protein 2/3 complex subunit 4	Arpc4	sp|P59999|ARPC4_MOUSE Actin-related protein 2/3 complex subunit 4 OS=Mus musculus OX=10090 GN=Arpc4 PE=1 SV=3;tr|Q3TX55|Q3TX55_MOUSE Actin-related protein 2/3 complex subunit 4 OS=Mus musculus OX=10090 GN=Arpc4 PE=1 SV=1;tr|E9PWA7|E9PWA7_MOUSE Actin-relate	15.5489	15.3391	15.4493	15.7375	15.4461	15.6804	47938.6	41450.4	44740.7	54633.6	44641.6	52513.5	0.883661	-0.178434	0.17456	0.758054
Kinesin-1 heavy chain	Kif5b	sp|Q61768|KINH_MOUSE Kinesin-1 heavy chain OS=Mus musculus OX=10090 GN=Kif5b PE=1 SV=3	14.3967	14.1263	14.6547	14.3226	13.9814	13.6644	21569.4	17883	25793.1	20489.5	16174.1	12983.6	1.31418	0.394166	0.17467	0.757783
Rho GTPase-activating protein 12	Arhgap12	sp|Q8C0D4|RHG12_MOUSE Rho GTPase-activating protein 12 OS=Mus musculus OX=10090 GN=Arhgap12 PE=1 SV=2;tr|B2RUJ8|B2RUJ8_MOUSE Rho GTPase-activating protein 12 OS=Mus musculus OX=10090 GN=Arhgap12 PE=1 SV=1;tr|S4R203|S4R203_MOUSE Rho GTPase-activating protei	11.0977	10.902	11.3993	10.9954	9.45907	10.7825	2191.5	1913.5	2701.04	2041.48	703.824	1761.39	1.51021	0.594745	0.176864	0.752359
Proteasome subunit alpha type-4;Proteasome subunit alpha type	Psma4	sp|Q9R1P0|PSA4_MOUSE Proteasome subunit alpha type-4 OS=Mus musculus OX=10090 GN=Psma4 PE=1 SV=1;tr|E9Q0X0|E9Q0X0_MOUSE Proteasome subunit alpha type (Fragment) OS=Mus musculus OX=10090 GN=Psma4 PE=1 SV=1;tr|E9PW69|E9PW69_MOUSE Proteasome subunit alpha typ	12.413	12.6622	12.6397	12.5395	12.3313	11.9687	5453.63	6481.9	6381.59	5953.41	5153.37	4008.09	1.21186	0.277223	0.177224	0.751478
Inosine-5-monophosphate dehydrogenase 2	Impdh2	sp|P24547|IMDH2_MOUSE Inosine-5-monophosphate dehydrogenase 2 OS=Mus musculus OX=10090 GN=Impdh2 PE=1 SV=2;tr|A0A0A6YXS4|A0A0A6YXS4_MOUSE Inosine-5-monophosphate dehydrogenase 2 (Fragment) OS=Mus musculus OX=10090 GN=Impdh2 PE=1 SV=1	12.1348	11.2414	11.7927	11.5418	11.0369	11.0459	4497.16	2421.02	3547.78	2981.45	2101.06	2114.21	1.45427	0.540294	0.177652	0.75043
Vang-like protein 2	Vangl2	sp|Q91ZD4|VANG2_MOUSE Vang-like protein 2 OS=Mus musculus OX=10090 GN=Vangl2 PE=1 SV=3;tr|D3YY75|D3YY75_MOUSE Vang-like protein OS=Mus musculus OX=10090 GN=Vangl2 PE=3 SV=1;tr|D3Z374|D3Z374_MOUSE Vang-like protein 2 (Fragment) OS=Mus musculus OX=10090 GN=V	12.143	12.1784	12.72	12.9463	12.9603	12.4095	4522.8	4635.15	6746.86	7892.68	7969.65	5440.41	0.746608	-0.421576	0.177665	0.750399
Rho GDP-dissociation inhibitor 1	Arhgdia	sp|Q99PT1|GDIR1_MOUSE Rho GDP-dissociation inhibitor 1 OS=Mus musculus OX=10090 GN=Arhgdia PE=1 SV=3	12.3475	12.888	13.4086	13.3411	13.5942	13.2607	5211.56	7580.09	10874	10377	12366.9	9814.51	0.726868	-0.460234	0.17782	0.750019
Rootletin	Crocc	sp|Q8CJ40|CROCC_MOUSE Rootletin OS=Mus musculus OX=10090 GN=Crocc PE=1 SV=2	13.7483	13.8831	14.3576	14.5828	15.0279	14.0741	13761	15108.8	20992.7	24539.2	33407.9	17247.5	0.663113	-0.592673	0.17796	0.749678
Putative adenosylhomocysteinase 3;Adenosylhomocysteinase	Ahcyl2	sp|Q68FL4|SAHH3_MOUSE Putative adenosylhomocysteinase 3 OS=Mus musculus OX=10090 GN=Ahcyl2 PE=1 SV=1;tr|F8WGT1|F8WGT1_MOUSE Putative adenosylhomocysteinase 3 OS=Mus musculus OX=10090 GN=Ahcyl2 PE=1 SV=1;tr|H3BKT5|H3BKT5_MOUSE Putative adenosylhomocysteinas	14.2285	13.8511	13.5634	13.5393	13.6531	13.3877	19195.8	14777.4	12105.7	11905.2	12882.3	10717.6	1.29781	0.376078	0.178065	0.749421
26S protease regulatory subunit 6B	Psmc4	sp|P54775|PRS6B_MOUSE 26S proteasome regulatory subunit 6B OS=Mus musculus OX=10090 GN=Psmc4 PE=1 SV=2;tr|A0A140LIZ5|A0A140LIZ5_MOUSE 26S proteasome regulatory subunit 6B OS=Mus musculus OX=10090 GN=Psmc4 PE=1 SV=1	13.8257	12.5035	11.9151	11.3542	11.3911	11.5008	14519.5	5806.69	3861.91	2617.91	2685.73	2897.92	2.9492	1.56033	0.179345	0.74631
Receptor-type tyrosine-protein phosphatase eta;Protein-tyrosine-phosphatase	Ptprj	sp|Q64455|PTPRJ_MOUSE Receptor-type tyrosine-protein phosphatase eta OS=Mus musculus OX=10090 GN=Ptprj PE=1 SV=2;tr|A2AWF8|A2AWF8_MOUSE Receptor-type tyrosine-protein phosphatase eta OS=Mus musculus OX=10090 GN=Ptprj PE=1 SV=1;tr|A2AWF9|A2AWF9_MOUSE Recept	10.497	10.7278	10.8978	10.8925	10.9155	11.457	1445.15	1695.86	1907.94	1900.94	1931.49	2811.26	0.759961	-0.396004	0.179432	0.7461
Carbonyl reductase [NADPH] 1	Cbr1	sp|P48758|CBR1_MOUSE Carbonyl reductase [NADPH] 1 OS=Mus musculus OX=10090 GN=Cbr1 PE=1 SV=3;tr|A0A338P684|A0A338P684_MOUSE Carbonyl reductase [NADPH] 1 OS=Mus musculus OX=10090 GN=Cbr1 PE=1 SV=1	14.5233	13.475	13.2952	13.1477	12.9591	12.7593	23547.7	11386.2	10052	9075.11	7963.02	6933.17	1.87666	0.908167	0.181647	0.740771
26S proteasome non-ATPase regulatory subunit 1	Psmd1	sp|Q3TXS7|PSMD1_MOUSE 26S proteasome non-ATPase regulatory subunit 1 OS=Mus musculus OX=10090 GN=Psmd1 PE=1 SV=1	14.4912	13.3844	12.627	11.5625	12.2979	12.7959	23029.6	10693.2	6325.66	3024.54	5035.43	7111.31	2.63975	1.4004	0.181898	0.740172
Radixin	Rdx	sp|P26043|RADI_MOUSE Radixin OS=Mus musculus OX=10090 GN=Rdx PE=1 SV=3;tr|A0A5F8MPB9|A0A5F8MPB9_MOUSE Radixin OS=Mus musculus OX=10090 GN=Rdx PE=1 SV=1	17.0465	17.6216	17.8584	17.8974	18.3527	17.7399	135365	201665	237637	244149	334744	218898	0.720323	-0.473284	0.182695	0.738272
Probable ATP-dependent RNA helicase DDX17	Ddx17	sp|Q501J6|DDX17_MOUSE Probable ATP-dependent RNA helicase DDX17 OS=Mus musculus OX=10090 GN=Ddx17 PE=1 SV=1;tr|Q3U741|Q3U741_MOUSE Probable ATP-dependent RNA helicase DDX17 OS=Mus musculus OX=10090 GN=Ddx17 PE=1 SV=1;tr|Q3TU25|Q3TU25_MOUSE Probable ATP-dep	14.9665	13.9034	13.1525	13.1391	13.0637	12.4779	32015.9	15322.9	9105.36	9021.18	8561.81	5704.56	2.42379	1.27726	0.185398	0.731896
Destrin	Dstn	sp|Q9R0P5|DEST_MOUSE Destrin OS=Mus musculus OX=10090 GN=Dstn PE=1 SV=3	13.684	14.6386	13.9232	14.6834	14.3729	14.6976	13161.2	25506.9	15534.6	26311.4	21216.5	26571.6	0.731485	-0.4511	0.186487	0.729352
Mitogen-activated protein kinase 3	Mapk3	sp|Q63844|MK03_MOUSE Mitogen-activated protein kinase 3 OS=Mus musculus OX=10090 GN=Mapk3 PE=1 SV=5;tr|D3Z6D8|D3Z6D8_MOUSE Mitogen-activated protein kinase 3 OS=Mus musculus OX=10090 GN=Mapk3 PE=1 SV=1;tr|A0A0U1RPX4|A0A0U1RPX4_MOUSE Mitogen-activated prote	14.4067	13.1133	13.0192	13.0094	12.2556	11.9682	21719.5	8861.28	8301.75	8245.55	4889.94	4006.7	2.26823	1.18157	0.187872	0.726137
Coatomer subunit delta	Arcn1	sp|Q5XJY5|COPD_MOUSE Coatomer subunit delta OS=Mus musculus OX=10090 GN=Arcn1 PE=1 SV=2	11.7135	10.3946	10.5612	10.2214	10.1354	9.58007	3358.26	1346.13	1510.91	1193.85	1124.76	765.4	2.01533	1.01102	0.18815	0.725496
Ras suppressor protein 1	Rsu1	sp|Q01730|RSU1_MOUSE Ras suppressor protein 1 OS=Mus musculus OX=10090 GN=Rsu1 PE=1 SV=3;tr|A2AUR7|A2AUR7_MOUSE Ras suppressor protein 1 OS=Mus musculus OX=10090 GN=Rsu1 PE=1 SV=1;tr|Q9D031|Q9D031_MOUSE Ras suppressor protein 1 OS=Mus musculus OX=10090 GN=	10.0776	9.66922	10.8491	10.6729	11.1341	10.6603	1080.59	814.189	1844.61	1632.54	2247.49	1618.34	0.68009	-0.556202	0.190101	0.721015
Tripeptidyl-peptidase 1	Tpp1	sp|O89023|TPP1_MOUSE Tripeptidyl-peptidase 1 OS=Mus musculus OX=10090 GN=Tpp1 PE=1 SV=2	11.4606	11.9925	10.8842	10.742	11.1625	10.6678	2818.28	4074.76	1890.04	1712.63	2292.17	1626.78	1.55961	0.641187	0.190195	0.720802
Proteasome activator complex subunit 1	Psme1	sp|P97371|PSME1_MOUSE Proteasome activator complex subunit 1 OS=Mus musculus OX=10090 GN=Psme1 PE=1 SV=2;tr|G3UWN9|G3UWN9_MOUSE Proteasome activator complex subunit 1 (Fragment) OS=Mus musculus OX=10090 GN=Psme1 PE=1 SV=1;tr|G3UXY0|G3UXY0_MOUSE Proteasome	11.8427	11.156	12.791	12.7126	12.7506	12.6084	3672.89	2281.87	7087.2	6712.34	6891.49	6244.63	0.657077	-0.605866	0.19038	0.720379
Sarcoplasmic/endoplasmic reticulum calcium ATPase 2;Sarcoplasmic/endoplasmic reticulum calcium ATPase 1	Atp2a2;Atp2a1	sp|O55143|AT2A2_MOUSE Sarcoplasmic/endoplasmic reticulum calcium ATPase 2 OS=Mus musculus OX=10090 GN=Atp2a2 PE=1 SV=2;sp|Q8R429|AT2A1_MOUSE Sarcoplasmic/endoplasmic reticulum calcium ATPase 1 OS=Mus musculus OX=10090 GN=Atp2a1 PE=1 SV=1	10.362	10.8679	11.1966	11.1397	11.1018	11.3504	1316.05	1868.8	2347	2256.23	2197.73	2611.02	0.782995	-0.352925	0.190569	0.719947
Splicing factor 3A subunit 3	Sf3a3	sp|Q9D554|SF3A3_MOUSE Splicing factor 3A subunit 3 OS=Mus musculus OX=10090 GN=Sf3a3 PE=1 SV=2	11.1074	9.87332	9.67176	10.4459	11.5345	11.4004	2206.28	937.919	815.624	1394.86	2966.41	2703.1	0.560535	-0.835123	0.191228	0.718449
YTH domain-containing family protein 2	Ythdf2	sp|Q91YT7|YTHD2_MOUSE YTH domain-containing family protein 2 OS=Mus musculus OX=10090 GN=Ythdf2 PE=1 SV=1;tr|E9PW90|E9PW90_MOUSE YTH domain-containing family protein 2 OS=Mus musculus OX=10090 GN=Ythdf2 PE=1 SV=1	10.7611	10.3495	11.0997	11.3447	10.8534	11.2202	1735.46	1304.7	2194.54	2600.73	1850.12	2385.71	0.765692	-0.385164	0.191727	0.717318
40S ribosomal protein S24	Rps24	sp|P62849|RS24_MOUSE 40S ribosomal protein S24 OS=Mus musculus OX=10090 GN=Rps24 PE=1 SV=1;tr|A0A286YEB7|A0A286YEB7_MOUSE 40S ribosomal protein S24 OS=Mus musculus OX=10090 GN=Rps24 PE=1 SV=1	10.4651	10.7112	9.79148	10.1277	9.56007	9.817	1413.54	1676.46	886.195	1118.77	754.862	902.01	1.43253	0.518566	0.192006	0.716685
Cardiac-enriched FHL2-interacting protein	CEFIP	sp|D3Z1D3|CEFIP_MOUSE Cardiac-enriched FHL2-interacting protein OS=Mus musculus OX=10090 GN=CEFIP PE=1 SV=1	13.9552	16.2036	13.7746	16.1536	16.1999	17.9476	15883	75469.2	14014.2	72898.4	75275.9	252794	0.26278	-1.92807	0.19228	0.716065
Hypermethylated in cancer 2 protein	Hic2	sp|Q9JLZ6|HIC2_MOUSE Hypermethylated in cancer 2 protein OS=Mus musculus OX=10090 GN=Hic2 PE=2 SV=4	18.5997	21.5304	19.4194	21.5036	21.371	23.1526	397253	3.02898e+06	701168	2.97323e+06	2.71214e+06	9.32453e+06	0.274978	-1.86261	0.192379	0.715843
Protein KHNYN	Khnyn	sp|Q80U38|KHNYN_MOUSE Protein KHNYN OS=Mus musculus OX=10090 GN=Khnyn PE=2 SV=2;tr|A0A2I3BPI4|A0A2I3BPI4_MOUSE Protein KHNYN OS=Mus musculus OX=10090 GN=Khnyn PE=1 SV=1	12.8822	13.9339	12.89	11.9963	12.2512	12.9682	7549.68	15650.3	7590.61	4085.51	4875.05	8013.41	1.81399	0.859165	0.193314	0.713737
Matrix metalloproteinase-15	Mmp15	sp|O54732|MMP15_MOUSE Matrix metalloproteinase-15 OS=Mus musculus OX=10090 GN=Mmp15 PE=2 SV=1	12.3102	12.8787	12.231	12.4826	13.1631	13.1952	5078.55	7531.39	4807.26	5723.17	9172.5	9378.88	0.717508	-0.478933	0.19456	0.710947
Protein-L-isoaspartate(D-aspartate) O-methyltransferase;Protein-L-isoaspartate O-methyltransferase	Pcmt1	sp|P23506|PIMT_MOUSE Protein-L-isoaspartate(D-aspartate) O-methyltransferase OS=Mus musculus OX=10090 GN=Pcmt1 PE=1 SV=3;tr|F6V9F1|F6V9F1_MOUSE Protein-L-isoaspartate(D-aspartate) O-methyltransferase (Fragment) OS=Mus musculus OX=10090 GN=Pcmt1 PE=1 SV=1;t	11.9439	12.6427	11.7504	12.4592	12.4898	13.0687	3939.78	6394.87	3445.27	5631.1	5751.81	8591.53	0.689878	-0.535587	0.195353	0.709181
Ragulator complex protein LAMTOR3	Lamtor3	sp|O88653|LTOR3_MOUSE Ragulator complex protein LAMTOR3 OS=Mus musculus OX=10090 GN=Lamtor3 PE=1 SV=1;tr|A0A0G2JGQ3|A0A0G2JGQ3_MOUSE Ragulator complex protein LAMTOR3 (Fragment) OS=Mus musculus OX=10090 GN=Lamtor3 PE=1 SV=1	13.7744	13.2215	12.3206	11.8346	12.5034	12.6868	14012.2	9551.42	5115.29	3652.33	5806.29	6593.37	1.78663	0.837241	0.195958	0.707837
ATP-dependent RNA helicase DDX19A	Ddx19a;Ddx19b	sp|Q61655|DD19A_MOUSE ATP-dependent RNA helicase DDX19A OS=Mus musculus OX=10090 GN=Ddx19a PE=1 SV=2;tr|Q8R3C7|Q8R3C7_MOUSE DEAD (Asp-Glu-Ala-Asp) box polypeptide 19b OS=Mus musculus OX=10090 GN=Ddx19b PE=1 SV=1;tr|Q8BZY3|Q8BZY3_MOUSE DEAD (Asp-Glu-Ala-Asp	12.0797	11.941	11.1326	10.6793	11.5611	11.195	4328.65	3931.87	2245.16	1639.8	3021.61	2344.4	1.49957	0.584547	0.196265	0.707156
Neuropilin-1	Nrp1	sp|P97333|NRP1_MOUSE Neuropilin-1 OS=Mus musculus OX=10090 GN=Nrp1 PE=1 SV=2	10.6112	10.691	9.91336	10.2773	11.8182	11.3928	1564.19	1653.15	964.315	1241.01	3611.04	2688.9	0.554526	-0.850674	0.196298	0.707083
Fructose-bisphosphate aldolase C	Aldoc	sp|P05063|ALDOC_MOUSE Fructose-bisphosphate aldolase C OS=Mus musculus OX=10090 GN=Aldoc PE=1 SV=4	16.9087	17.5025	17.0695	16.819	17.0185	16.6064	123034	185685	137541	115617	132764	99775.6	1.28178	0.358149	0.197743	0.703899
60S acidic ribosomal protein P2	Rplp2	sp|P99027|RLA2_MOUSE 60S acidic ribosomal protein P2 OS=Mus musculus OX=10090 GN=Rplp2 PE=1 SV=3;tr|A0A5F8MPY2|A0A5F8MPY2_MOUSE Uncharacterized protein OS=Mus musculus OX=10090 GN=Rplp2-ps1 PE=3 SV=1	16.0558	15.655	16.8336	16.7372	16.6248	16.8746	68120.4	51597	116793	109244	101056	120160	0.7157	-0.482573	0.198408	0.702441
DNA topoisomerase 1	Top1	sp|Q04750|TOP1_MOUSE DNA topoisomerase 1 OS=Mus musculus OX=10090 GN=Top1 PE=1 SV=2	9.49016	9.88917	10.6206	9.23596	9.8009	8.60912	719.156	948.28	1574.41	602.977	892	390.484	1.71939	0.7819	0.198948	0.701261
Proteasomal ubiquitin receptor ADRM1	Adrm1;Gm9774	sp|Q9JKV1|ADRM1_MOUSE Proteasomal ubiquitin receptor ADRM1 OS=Mus musculus OX=10090 GN=Adrm1 PE=1 SV=2;tr|D3YUD8|D3YUD8_MOUSE Predicted pseudogene 9774 OS=Mus musculus OX=10090 GN=Gm9774 PE=4 SV=3;tr|A0A0A6YVU8|A0A0A6YVU8_MOUSE Predicted pseudogene 9774 OS	11.2615	10.259	10.4106	10.344	9.01233	10.1359	2454.99	1225.37	1361.14	1299.73	516.395	1125.15	1.71405	0.777409	0.199457	0.70015
Sorting nexin-6;Sorting nexin-6, N-terminally processed	Snx6	sp|Q6P8X1|SNX6_MOUSE Sorting nexin-6 OS=Mus musculus OX=10090 GN=Snx6 PE=1 SV=2;tr|A0A1W2P701|A0A1W2P701_MOUSE Sorting nexin-6 OS=Mus musculus OX=10090 GN=Snx6 PE=1 SV=1	11.8287	11.9464	9.7975	9.58022	10.3716	10.7593	3637.42	3946.61	889.9	765.48	1324.84	1733.29	2.21621	1.1481	0.200052	0.698857
N-acylglucosamine 2-epimerase	Renbp	sp|P82343|RENBP_MOUSE N-acylglucosamine 2-epimerase OS=Mus musculus OX=10090 GN=Renbp PE=1 SV=3;tr|D6RHA2|D6RHA2_MOUSE N-acylglucosamine 2-epimerase OS=Mus musculus OX=10090 GN=Renbp PE=1 SV=2	13.5184	12.6763	12.296	12.4972	11.9624	11.8941	11733.9	6545.56	5028.81	5781.39	3990.63	3806.11	1.71661	0.77956	0.201726	0.695237
Leukotriene A-4 hydrolase	Lta4h	sp|P24527|LKHA4_MOUSE Leukotriene A-4 hydrolase OS=Mus musculus OX=10090 GN=Lta4h PE=1 SV=4	10.0586	10.8424	10.8509	11.2735	10.9886	10.7799	1066.45	1836.06	1846.91	2475.49	2031.88	1758.22	0.758017	-0.399698	0.20294	0.692633
NEDD8-conjugating enzyme Ubc12	Ube2m	sp|P61082|UBC12_MOUSE NEDD8-conjugating enzyme Ubc12 OS=Mus musculus OX=10090 GN=Ube2m PE=1 SV=1;tr|F7CDT0|F7CDT0_MOUSE NEDD8-conjugating enzyme Ubc12 (Fragment) OS=Mus musculus OX=10090 GN=Ube2m PE=1 SV=1;tr|F6WMC0|F6WMC0_MOUSE NEDD8-conjugating enzyme Ub	15.0119	13.9621	14.1513	13.8767	13.9101	13.5386	33039.4	15959.2	18195.6	15041.9	15394.2	11899.4	1.58718	0.666468	0.204625	0.689042
Low-density lipoprotein receptor	Ldlr	sp|P35951|LDLR_MOUSE Low-density lipoprotein receptor OS=Mus musculus OX=10090 GN=Ldlr PE=1 SV=2;tr|A0A1L1SRE8|A0A1L1SRE8_MOUSE Low-density lipoprotein receptor OS=Mus musculus OX=10090 GN=Ldlr PE=1 SV=1	11.7658	11.7598	11.3129	12.47	11.9359	11.7151	3482.24	3467.79	2544.03	5673.41	3918	3361.99	0.73294	-0.448233	0.205035	0.688172
Acyl-protein thioesterase 1	Lypla1	sp|P97823|LYPA1_MOUSE Acyl-protein thioesterase 1 OS=Mus musculus OX=10090 GN=Lypla1 PE=1 SV=1;tr|D3Z111|D3Z111_MOUSE Acyl-protein thioesterase 1 OS=Mus musculus OX=10090 GN=Lypla1 PE=1 SV=1;tr|J3QP56|J3QP56_MOUSE Acyl-protein thioesterase 1 OS=Mus musculu	10.7357	10.279	8.46522	11.1114	10.4615	10.7826	1705.17	1242.47	353.415	2212.41	1410.02	1761.51	0.613131	-0.705733	0.205412	0.687374
Fatty acid-binding protein, brain	Fabp7	sp|P51880|FABP7_MOUSE Fatty acid-binding protein, brain OS=Mus musculus OX=10090 GN=Fabp7 PE=1 SV=2;tr|E9Q0H6|E9Q0H6_MOUSE Fatty acid-binding protein, brain OS=Mus musculus OX=10090 GN=Fabp7 PE=1 SV=1	17.5975	17.1596	17.2551	17.3389	16.8823	16.6906	198324	146404	156424	165779	120803	105772	1.2773	0.353092	0.20588	0.686385
ATP synthase subunit alpha, mitochondrial;ATP synthase subunit alpha	Atp5a1	sp|Q03265|ATPA_MOUSE ATP synthase subunit alpha, mitochondrial OS=Mus musculus OX=10090 GN=Atp5f1a PE=1 SV=1;tr|D3Z6F5|D3Z6F5_MOUSE ATP synthase subunit alpha OS=Mus musculus OX=10090 GN=Atp5a1 PE=1 SV=1	13.0847	12.4936	12.7765	12.5559	12.6095	12.29	8687.35	5766.98	7016.33	6021.47	6249.39	5007.93	1.2426	0.313363	0.206615	0.684838
Exportin-7	Xpo7	sp|Q9EPK7|XPO7_MOUSE Exportin-7 OS=Mus musculus OX=10090 GN=Xpo7 PE=1 SV=3;tr|A0A2I3BQV5|A0A2I3BQV5_MOUSE Exportin-7 OS=Mus musculus OX=10090 GN=Xpo7 PE=1 SV=1;tr|E9PUW7|E9PUW7_MOUSE Exportin-7 OS=Mus musculus OX=10090 GN=Xpo7 PE=1 SV=1	11.7147	11.6393	11.1169	11.0588	11.4457	10.7463	3361.06	3189.91	2220.86	2133.19	2789.32	1717.74	1.32101	0.401636	0.207136	0.683744
SH3 domain-binding protein 1	Sh3bp1	sp|P55194|3BP1_MOUSE SH3 domain-binding protein 1 OS=Mus musculus OX=10090 GN=Sh3bp1 PE=1 SV=3;tr|A2A5V3|A2A5V3_MOUSE SH3 domain-binding protein 1 OS=Mus musculus OX=10090 GN=Sh3bp1 PE=1 SV=1;tr|A2A5V2|A2A5V2_MOUSE SH3 domain-binding protein 1 OS=Mus muscu	9.83965	9.35805	10.6551	11.0545	10.2765	10.6047	916.283	656.226	1612.52	2126.85	1240.32	1557.16	0.646795	-0.628621	0.207224	0.683561
Trophoblast glycoprotein	Tpbg	sp|Q9Z0L0|TPBG_MOUSE Trophoblast glycoprotein OS=Mus musculus OX=10090 GN=Tpbg PE=1 SV=3	11.8864	11.4909	11.3759	11.8612	11.7031	12.0211	3785.85	2878.1	2657.58	3720.29	3334.14	4156.35	0.831479	-0.266248	0.207313	0.683373
Alpha-soluble NSF attachment protein	Napa	sp|Q9DB05|SNAA_MOUSE Alpha-soluble NSF attachment protein OS=Mus musculus OX=10090 GN=Napa PE=1 SV=1	12.1043	12.2077	12.3633	12.4667	12.3849	13.2133	4403.09	4730.25	5268.95	5660.45	5348.43	9497.29	0.702339	-0.50976	0.20834	0.681228
COP9 signalosome complex subunit 6	Cops6	sp|O88545|CSN6_MOUSE COP9 signalosome complex subunit 6 OS=Mus musculus OX=10090 GN=Cops6 PE=1 SV=1;tr|F6QK86|F6QK86_MOUSE COP9 signalosome complex subunit 6 (Fragment) OS=Mus musculus OX=10090 GN=Cops6 PE=1 SV=1;tr|D3Z0F5|D3Z0F5_MOUSE COP9 signalosome com	12.0366	13.372	12.5232	13.3905	13.4016	13.0373	4201.24	10601.6	5886.52	10738.5	10821.4	8406.56	0.690419	-0.534455	0.209953	0.677878
Actin, cytoplasmic 1;Actin, cytoplasmic 1, N-terminally processed	Actb;Actg1	sp|P60710|ACTB_MOUSE Actin, cytoplasmic 1 OS=Mus musculus OX=10090 GN=Actb PE=1 SV=1;tr|E9Q1F2|E9Q1F2_MOUSE Actin, cytoplasmic 1 OS=Mus musculus OX=10090 GN=Actb PE=1 SV=1;tr|E9Q5F4|E9Q5F4_MOUSE Actin, cytoplasmic 1 (Fragment) OS=Mus musculus OX=10090 GN=A	22.5714	22.1492	21.1455	21.3225	21.1631	21.5463	6.23259e+06	4.65129e+06	2.31969e+06	2.62248e+06	2.34816e+06	3.06255e+06	1.64363	0.716884	0.210044	0.67769
Heat shock protein 105 kDa	Hsph1	sp|Q61699|HS105_MOUSE Heat shock protein 105 kDa OS=Mus musculus OX=10090 GN=Hsph1 PE=1 SV=2;tr|E9Q0U7|E9Q0U7_MOUSE Heat shock protein 105 kDa OS=Mus musculus OX=10090 GN=Hsph1 PE=1 SV=1	11.4858	10.5628	11.6354	11.5979	11.7092	11.7536	2867.94	1512.58	3181.3	3099.67	3348.27	3452.92	0.763754	-0.388819	0.210045	0.677687
Cytoplasmic dynein 1 light intermediate chain 2	Dync1li2	sp|Q6PDL0|DC1L2_MOUSE Cytoplasmic dynein 1 light intermediate chain 2 OS=Mus musculus OX=10090 GN=Dync1li2 PE=1 SV=2;tr|A0A1D5RM94|A0A1D5RM94_MOUSE Dynein light intermediate chain OS=Mus musculus OX=10090 GN=Dync1li2 PE=1 SV=1;tr|A0A1D5RMC1|A0A1D5RMC1_MOUS	12.9663	12.5515	12.0768	12.2644	12.0471	12.0769	8002.86	6003.13	4319.95	4919.85	4231.93	4320.25	1.3603	0.44392	0.210575	0.676594
RuvB-like 1	Ruvbl1	sp|P60122|RUVB1_MOUSE RuvB-like 1 OS=Mus musculus OX=10090 GN=Ruvbl1 PE=1 SV=1	12.7595	12.0286	12.0235	12.3571	10.3854	10.8589	6934.13	4178.01	4163.27	5246.36	1337.57	1857.18	1.80964	0.855706	0.211493	0.674704
Eukaryotic translation initiation factor 5	Eif5	sp|P59325|IF5_MOUSE Eukaryotic translation initiation factor 5 OS=Mus musculus OX=10090 GN=Eif5 PE=1 SV=1;tr|A0A1Y7VKT5|A0A1Y7VKT5_MOUSE Eukaryotic translation initiation factor 5 (Fragment) OS=Mus musculus OX=10090 GN=Eif5 PE=1 SV=1;tr|Q8BVV6|Q8BVV6_MOUSE	13.5847	12.878	12.8467	12.8132	12.7096	12.5426	12285.8	7527.73	7366.18	7197.1	6698.4	5966.21	1.36845	0.452538	0.214	0.669586
SPARC-related modular calcium-binding protein 1	Smoc1	sp|Q8BLY1|SMOC1_MOUSE SPARC-related modular calcium-binding protein 1 OS=Mus musculus OX=10090 GN=Smoc1 PE=2 SV=2;tr|D3Z3A3|D3Z3A3_MOUSE SPARC-related modular calcium-binding protein 1 OS=Mus musculus OX=10090 GN=Smoc1 PE=1 SV=1;tr|E9QKW2|E9QKW2_MOUSE SPAR	13.1796	12.1217	11.4876	10.0252	11.8136	11.4576	9278.01	4456.51	2871.52	1042.04	3599.55	2812.43	2.2278	1.15562	0.214476	0.668622
ADP-ribosylation factor-like protein 3	Arl3	sp|Q9WUL7|ARL3_MOUSE ADP-ribosylation factor-like protein 3 OS=Mus musculus OX=10090 GN=Arl3 PE=1 SV=1;tr|A0A494BAJ6|A0A494BAJ6_MOUSE ADP-ribosylation factor-like protein 3 OS=Mus musculus OX=10090 GN=Arl3 PE=1 SV=1	10.1766	9.40148	9.98612	9.74915	9.42464	9.16937	1157.34	676.281	1014.2	860.571	687.226	575.778	1.34105	0.423363	0.217122	0.663297
Retrovirus-related Env polyprotein from Fv-4 locus	Fv4	sp|P11370|ENV2_MOUSE Retrovirus-related Env polyprotein from Fv-4 locus OS=Mus musculus OX=10090 GN=Fv4 PE=1 SV=2	14.5164	15.7428	14.5117	15.5973	15.3967	16.5964	23435.4	54834.6	23359.1	49574.1	43138.8	99086.4	0.529872	-0.916284	0.217352	0.662837
EH domain-containing protein 2	Ehd2	sp|Q8BH64|EHD2_MOUSE EH domain-containing protein 2 OS=Mus musculus OX=10090 GN=Ehd2 PE=1 SV=1	11.9696	12.301	12.1648	12.2174	12.3012	12.6286	4010.59	5046.26	4591.66	4762.16	5046.96	6332.68	0.845539	-0.242057	0.217584	0.662374
60S ribosomal protein L10;60S ribosomal protein L10-like	Rpl10;Rpl10l	sp|Q6ZWV3|RL10_MOUSE 60S ribosomal protein L10 OS=Mus musculus OX=10090 GN=Rpl10 PE=1 SV=3;tr|I7HLV2|I7HLV2_MOUSE 60S ribosomal protein L10 (Fragment) OS=Mus musculus OX=10090 GN=Rpl10 PE=1 SV=1;sp|P86048|RL10L_MOUSE 60S ribosomal protein L10-like OS=Mus m	13.3017	12.7297	14.3682	12.4786	12.7182	12.6909	10097.4	6792.37	21147.5	5707.33	6738.45	6612.13	1.99588	0.997025	0.219745	0.658082
Serum albumin	Alb	sp|P07724|ALBU_MOUSE Albumin OS=Mus musculus OX=10090 GN=Alb PE=1 SV=3	12.8991	11.9586	13.3116	12.0386	12.4479	11.9064	7638.64	3980.13	10167	4207.07	5587.16	3838.69	1.59802	0.676288	0.220434	0.656721
Tubulin polymerization-promoting protein family member 3	Tppp3	sp|Q9CRB6|TPPP3_MOUSE Tubulin polymerization-promoting protein family member 3 OS=Mus musculus OX=10090 GN=Tppp3 PE=1 SV=1	9.76806	11.1911	11.4458	12.0929	11.8024	10.9504	871.925	2338.07	2789.52	4368.43	3571.71	1978.79	0.604854	-0.72534	0.224523	0.64874
Epsin-1	Epn1	sp|Q80VP1|EPN1_MOUSE Epsin-1 OS=Mus musculus OX=10090 GN=Epn1 PE=1 SV=3	10.1234	10.4106	10.6301	10.1742	10.2625	10.0437	1115.44	1361.14	1584.82	1155.42	1228.34	1055.49	1.18089	0.23988	0.224592	0.648605
Neuronal calcium sensor 1	Ncs1	sp|Q8BNY6|NCS1_MOUSE Neuronal calcium sensor 1 OS=Mus musculus OX=10090 GN=Ncs1 PE=1 SV=3	10.7953	11.2594	11.166	12.0537	11.7259	10.9122	1777.09	2451.42	2297.74	4251.33	3387.25	1927.08	0.682257	-0.551612	0.225839	0.646201
Ragulator complex protein LAMTOR5	Lamtor5	tr|G3UW70|G3UW70_MOUSE Ragulator complex protein LAMTOR5 OS=Mus musculus OX=10090 GN=Lamtor5 PE=1 SV=1;sp|Q9D1L9|LTOR5_MOUSE Ragulator complex protein LAMTOR5 OS=Mus musculus OX=10090 GN=Lamtor5 PE=1 SV=1	8.95703	9.52643	9.70276	10.682	9.35889	10.0595	496.975	737.465	833.339	1642.87	656.609	1067.12	0.614206	-0.703206	0.226291	0.645333
Histone H1.0;Histone H1.0, N-terminally processed	H1f0	sp|P10922|H10_MOUSE Histone H1.0 OS=Mus musculus OX=10090 GN=H1-0 PE=2 SV=4	11.6639	11.9176	12.4565	13.0419	12.7704	11.9086	3244.77	3868.61	5620.57	8433.41	6986.72	3844.55	0.661	-0.597279	0.227826	0.642396
40S ribosomal protein S6	Rps6	sp|P62754|RS6_MOUSE 40S ribosomal protein S6 OS=Mus musculus OX=10090 GN=Rps6 PE=1 SV=1	13.661	12.7426	15.2122	12.4186	12.7146	12.2559	12953	6853.38	37960.2	5474.84	6721.65	4890.95	3.38065	1.7573	0.227941	0.642178
Serine/threonine-protein phosphatase 6 catalytic subunit;Serine/threonine-protein phosphatase 6 catalytic subunit, N-terminally processed	Ppp6c	sp|Q9CQR6|PPP6_MOUSE Serine/threonine-protein phosphatase 6 catalytic subunit OS=Mus musculus OX=10090 GN=Ppp6c PE=1 SV=1;tr|A0A0N4SVL9|A0A0N4SVL9_MOUSE Serine/threonine-protein phosphatase OS=Mus musculus OX=10090 GN=Ppp6c PE=1 SV=1	12.1387	12.8189	11.0433	11.8888	10.0858	10.7964	4509.34	7225.59	2110.4	3792.15	1086.75	1778.44	2.07971	1.05638	0.22827	0.641552
60S ribosomal protein L6	Rpl6	sp|P47911|RL6_MOUSE 60S ribosomal protein L6 OS=Mus musculus OX=10090 GN=Rpl6 PE=1 SV=3	14.5655	14.8878	15.8514	14.2891	14.1024	14.792	24246.7	30316.2	59121.7	20019.2	17589.2	28368.5	1.7231	0.785004	0.230085	0.638111
60S ribosomal protein L27a	Rpl27a	sp|P14115|RL27A_MOUSE 60S ribosomal protein L27a OS=Mus musculus OX=10090 GN=Rpl27a PE=1 SV=5	14.1611	13.5969	15.1837	13.8045	13.0962	13.5958	18319.6	12390.1	37217.7	14307.7	8756.87	12380.7	1.91641	0.938403	0.230431	0.637459
COP9 signalosome complex subunit 8	Cops8	sp|Q8VBV7|CSN8_MOUSE COP9 signalosome complex subunit 8 OS=Mus musculus OX=10090 GN=Cops8 PE=1 SV=1;tr|A0A087WPM5|A0A087WPM5_MOUSE COP9 signalosome complex subunit 8 (Fragment) OS=Mus musculus OX=10090 GN=Cops8 PE=1 SV=6	12.5547	11.8821	12.0149	12.0954	11.5933	11.5246	6016.46	3774.58	4138.52	4376.01	3089.8	2946.12	1.33785	0.419912	0.230681	0.636988
Mitogen-activated protein kinase kinase kinase kinase 4	Map4k4	tr|A0A0A6YWR8|A0A0A6YWR8_MOUSE Mitogen-activated protein kinase kinase kinase kinase 4 OS=Mus musculus OX=10090 GN=Map4k4 PE=1 SV=1;tr|A0A0A6YW53|A0A0A6YW53_MOUSE Mitogen-activated protein kinase kinase kinase kinase 4 OS=Mus musculus OX=10090 GN=Map4k4 PE	16.2755	16.3824	16.4885	16.5854	17.1812	16.4474	79325.7	85426.7	91946.1	98333.8	148613	89363.6	0.763278	-0.389719	0.230802	0.636759
Tenascin	Tnc	sp|Q80YX1|TENA_MOUSE Tenascin OS=Mus musculus OX=10090 GN=Tnc PE=1 SV=1	18.3206	18.6522	20.2949	17.7107	17.7416	18.1496	327378	411976	1.28639e+06	214512	219156	290786	2.79624	1.48349	0.23123	0.635957
AP-2 complex subunit alpha-2	Ap2a2	sp|P17427|AP2A2_MOUSE AP-2 complex subunit alpha-2 OS=Mus musculus OX=10090 GN=Ap2a2 PE=1 SV=2	13.4098	13.4602	13.2603	13.4295	13.8976	13.4991	10883.1	11270	9811.79	11032.7	15261.4	11578	0.844021	-0.244649	0.23171	0.635055
Ubiquitin-conjugating enzyme E2 variant 1;Ubiquitin-conjugating enzyme E2 variant 2	Ube2v1;Gm20431;Ube2v2	sp|Q9CZY3|UB2V1_MOUSE Ubiquitin-conjugating enzyme E2 variant 1 OS=Mus musculus OX=10090 GN=Ube2v1 PE=1 SV=1;tr|B7ZBY7|B7ZBY7_MOUSE Ubiquitin-conjugating enzyme E2 variant 1 OS=Mus musculus OX=10090 GN=Ube2v1 PE=4 SV=1;tr|E9PY39|E9PY39_MOUSE Predicted gene	13.3855	12.4604	13.2232	13.2574	13.5851	13.4223	10701.3	5635.78	9562.68	9792.08	12289.2	10977.8	0.78344	-0.352105	0.232006	0.634501
Heat shock 70 kDa protein 1-like	Hspa1l	sp|P16627|HS71L_MOUSE Heat shock 70 kDa protein 1-like OS=Mus musculus OX=10090 GN=Hspa1l PE=1 SV=4	11.3588	12.005	12.2052	12.0119	12.6614	12.2287	2626.27	4110.22	4722.06	4129.93	6478.3	4799.61	0.743683	-0.42724	0.232085	0.634353
60S ribosomal protein L7a	Rpl7a	sp|P12970|RL7A_MOUSE 60S ribosomal protein L7a OS=Mus musculus OX=10090 GN=Rpl7a PE=1 SV=2	15.6064	15.197	16.9752	15.1944	14.9123	14.7235	49887.8	37562.4	128838	37494.7	30835.4	27053	2.26757	1.18115	0.23368	0.631379
U4/U6 small nuclear ribonucleoprotein Prp4	Prpf4	sp|Q9DAW6|PRP4_MOUSE U4/U6 small nuclear ribonucleoprotein Prp4 OS=Mus musculus OX=10090 GN=Prpf4 PE=1 SV=1	10.6571	9.6634	8.71837	10.8231	10.9887	9.94925	1614.76	810.911	421.202	1811.66	2032.02	988.605	0.589134	-0.763331	0.23482	0.629264
Dihydropyrimidinase-related protein 3	Dpysl3	tr|E9PWE8|E9PWE8_MOUSE Dihydropyrimidinase-related protein 3 OS=Mus musculus OX=10090 GN=Dpysl3 PE=1 SV=1;sp|Q62188|DPYL3_MOUSE Dihydropyrimidinase-related protein 3 OS=Mus musculus OX=10090 GN=Dpysl3 PE=1 SV=1;tr|Q3TT92|Q3TT92_MOUSE Dihydropyrimidinase-re	14.8682	14.2454	14.4252	14.1041	14.2685	14.3111	29907.1	19421.9	21999.8	17609.9	19735.4	20326.9	1.2368	0.306609	0.235168	0.628623
AHNAK nucleoprotein (desmoyokin)	Ahnak	tr|E9Q616|E9Q616_MOUSE AHNAK nucleoprotein (desmoyokin) OS=Mus musculus OX=10090 GN=Ahnak PE=1 SV=1	13.4493	13.808	14.4525	14.712	14.5649	13.9843	11185.2	14342.4	22420	26838.2	24236.6	16206.7	0.712642	-0.48875	0.23627	0.626591
Protein LSM12 homolog	Lsm12	sp|Q9D0R8|LSM12_MOUSE Protein LSM12 homolog OS=Mus musculus OX=10090 GN=Lsm12 PE=1 SV=1	11.2234	11.8144	11.204	10.2996	10.2126	11.5296	2391	3601.54	2359.07	1260.34	1186.59	2956.35	1.54566	0.628221	0.237445	0.624438
78 kDa glucose-regulated protein	Hspa5	sp|P20029|BIP_MOUSE Endoplasmic reticulum chaperone BiP OS=Mus musculus OX=10090 GN=Hspa5 PE=1 SV=3	12.3793	12.2996	13.1447	12.4938	13.6449	13.4506	5327.71	5041.37	9056.26	5767.78	12809.3	11195.3	0.652464	-0.616031	0.238507	0.622499
Monocarboxylate transporter 1	Slc16a1	sp|P53986|MOT1_MOUSE Monocarboxylate transporter 1 OS=Mus musculus OX=10090 GN=Slc16a1 PE=1 SV=1	12.5016	12.6203	13.9735	13.3534	14.8826	13.936	5799.05	6296.35	16085.8	10465.8	30207.1	15673.1	0.500145	-0.99958	0.238971	0.621655
ATP-dependent 6-phosphofructokinase, liver type;ATP-dependent 6-phosphofructokinase, platelet type;ATP-dependent 6-phosphofructokinase	Pfkl;Pfkp	sp|P12382|PFKAL_MOUSE ATP-dependent 6-phosphofructokinase, liver type OS=Mus musculus OX=10090 GN=Pfkl PE=1 SV=4;sp|Q9WUA3|PFKAP_MOUSE ATP-dependent 6-phosphofructokinase, platelet type OS=Mus musculus OX=10090 GN=Pfkp PE=1 SV=1;tr|Q8C605|Q8C605_MOUSE ATP-	11.4951	11.3848	10.9355	10.682	10.3382	11.3417	2886.49	2674.03	1958.45	1642.87	1294.52	2595.33	1.359	0.442549	0.239502	0.620692
Golgi apparatus protein 1	Glg1	sp|Q61543|GSLG1_MOUSE Golgi apparatus protein 1 OS=Mus musculus OX=10090 GN=Glg1 PE=1 SV=1;tr|F8WHM5|F8WHM5_MOUSE Golgi apparatus protein 1 (Fragment) OS=Mus musculus OX=10090 GN=Glg1 PE=1 SV=1	13.2239	12.9122	13.493	13.5829	13.4765	13.3282	9567.33	7708.32	11529.2	12270.4	11398.1	10284.6	0.84837	-0.237234	0.239787	0.620174
Collagen alpha-1(I) chain	Col1a1	sp|P11087|CO1A1_MOUSE Collagen alpha-1(I) chain OS=Mus musculus OX=10090 GN=Col1a1 PE=1 SV=4	12.8925	12.9386	13.5767	13.7228	13.9698	13.1048	7603.77	7850.67	12217.8	13519.9	16044.6	8809.23	0.721125	-0.471679	0.24143	0.617209
Thimet oligopeptidase	Thop1	sp|Q8C1A5|THOP1_MOUSE Thimet oligopeptidase OS=Mus musculus OX=10090 GN=Thop1 PE=1 SV=1;tr|A0A0R4IZY0|A0A0R4IZY0_MOUSE Thimet oligopeptidase OS=Mus musculus OX=10090 GN=Thop1 PE=1 SV=1	12.8892	12.4678	12.9889	12.7555	13.2169	13.7886	7586.4	5664.76	8129.21	6914.94	9521.02	14150.8	0.699007	-0.516621	0.243265	0.61392
Protein SET	Set	sp|Q9EQU5|SET_MOUSE Protein SET OS=Mus musculus OX=10090 GN=Set PE=1 SV=1;tr|A2BE92|A2BE92_MOUSE Protein SET (Fragment) OS=Mus musculus OX=10090 GN=Set PE=1 SV=1;tr|A2BE93|A2BE93_MOUSE Protein SET (Fragment) OS=Mus musculus OX=10090 GN=Set PE=1 SV=1	10.9268	12.4995	11.4759	11.2112	10.5727	10.8449	1946.68	5790.61	2848.33	2370.87	1523	1839.25	1.8464	0.884714	0.244548	0.611635
60S ribosomal protein L14	Rpl14	sp|Q9CR57|RL14_MOUSE 60S ribosomal protein L14 OS=Mus musculus OX=10090 GN=Rpl14 PE=1 SV=3;tr|A0A1L1SUF6|A0A1L1SUF6_MOUSE 60S ribosomal protein L14 (Fragment) OS=Mus musculus OX=10090 GN=Rpl14 PE=1 SV=1	13.3362	12.2226	14.7965	12.2775	12.0034	12.3612	10341.8	4779.35	28457.1	4964.73	4105.66	5261.29	3.04069	1.6044	0.244791	0.611205
40S ribosomal protein S8	Rps8	sp|P62242|RS8_MOUSE 40S ribosomal protein S8 OS=Mus musculus OX=10090 GN=Rps8 PE=1 SV=2	15.3359	14.5106	17.2254	14.3678	14.0404	13.7819	41358.6	23341.3	153236	21141.6	16849.3	14085.3	4.18495	2.06521	0.245721	0.609557
Enhancer of mRNA-decapping protein 4	Edc4	sp|Q3UJB9|EDC4_MOUSE Enhancer of mRNA-decapping protein 4 OS=Mus musculus OX=10090 GN=Edc4 PE=1 SV=2;tr|D6RE33|D6RE33_MOUSE Enhancer of mRNA-decapping protein 4 OS=Mus musculus OX=10090 GN=Edc4 PE=1 SV=1;tr|A0A0R4J1Q0|A0A0R4J1Q0_MOUSE Enhancer of mRNA-deca	9.83487	8.63498	9.67518	8.949	8.85815	9.02815	913.253	397.547	817.56	494.217	464.054	522.088	1.43773	0.523794	0.24653	0.608131
Neurocalcin-delta;Neuron-specific calcium-binding protein hippocalcin	Ncald;Hpca	sp|Q91X97|NCALD_MOUSE Neurocalcin-delta OS=Mus musculus OX=10090 GN=Ncald PE=1 SV=4;sp|P84075|HPCA_MOUSE Neuron-specific calcium-binding protein hippocalcin OS=Mus musculus OX=10090 GN=Hpca PE=1 SV=2;tr|E9PV73|E9PV73_MOUSE Neuron-specific calcium-binding p	13.6861	14.3465	14.4585	14.6747	14.4603	14.3606	13180.3	20831.8	22513.5	26153.2	22541.6	21036.4	0.810622	-0.302899	0.246898	0.607482
V-type proton ATPase subunit H	Atp6v1h	sp|Q8BVE3|VATH_MOUSE V-type proton ATPase subunit H OS=Mus musculus OX=10090 GN=Atp6v1h PE=1 SV=1;tr|A0A0A6YVU0|A0A0A6YVU0_MOUSE V-type proton ATPase subunit H (Fragment) OS=Mus musculus OX=10090 GN=Atp6v1h PE=1 SV=1;tr|A0A0A6YWP6|A0A0A6YWP6_MOUSE V-type p	11.8677	10.8894	11.5655	11.0479	10.8422	11.2506	3737.09	1896.86	3030.84	2117.14	1835.81	2436.51	1.35611	0.439472	0.249455	0.603007
AP-2 complex subunit mu	Ap2m1	sp|P84091|AP2M1_MOUSE AP-2 complex subunit mu OS=Mus musculus OX=10090 GN=Ap2m1 PE=1 SV=1;tr|Q3TWV4|Q3TWV4_MOUSE AP-2 complex subunit mu OS=Mus musculus OX=10090 GN=Ap2m1 PE=1 SV=1	13.5969	13.7561	14.1054	13.5929	13.6955	13.5104	12390.1	13835.6	17625.8	12355.8	13266.5	11669.1	1.17592	0.233786	0.250411	0.601347
Fibronectin;Anastellin	Fn1	tr|A0A087WS56|A0A087WS56_MOUSE Fibronectin OS=Mus musculus OX=10090 GN=Fn1 PE=1 SV=1;tr|Q3UHL6|Q3UHL6_MOUSE Fibronectin OS=Mus musculus OX=10090 GN=Fn1 PE=1 SV=1;tr|A0A087WR50|A0A087WR50_MOUSE Fibronectin OS=Mus musculus OX=10090 GN=Fn1 PE=1 SV=1;sp|P11276	18.757	20.5865	20.6309	19.0177	18.8028	19.8898	443016	1.57454e+06	1.62375e+06	530760	457306	971463	1.85826	0.89395	0.250703	0.60084
Prefoldin subunit 1	Pfdn1	sp|Q9CWM4|PFD1_MOUSE Prefoldin subunit 1 OS=Mus musculus OX=10090 GN=Pfdn1 PE=1 SV=1;tr|A0A494BAH5|A0A494BAH5_MOUSE Prefoldin subunit 1 (Fragment) OS=Mus musculus OX=10090 GN=Pfdn1 PE=1 SV=1;tr|Q9CQF7|Q9CQF7_MOUSE Prefoldin 1 OS=Mus musculus OX=10090 GN=Pf	11.9401	11.7934	10.9037	11.9006	11.9697	11.9782	3929.42	3549.5	1915.76	3823.29	4010.87	4034.57	0.791548	-0.337251	0.255094	0.5933
Na(+)/H(+) exchange regulatory cofactor NHE-RF1	Slc9a3r1	sp|P70441|NHRF1_MOUSE Na(+)/H(+) exchange regulatory cofactor NHE-RF1 OS=Mus musculus OX=10090 GN=Slc9a3r1 PE=1 SV=3	13.714	13.8549	14.1721	14.3776	14.5662	13.806	13437.7	14816.3	18459.8	21285.7	24258.5	14322.5	0.780297	-0.357905	0.255145	0.593212
BAG family molecular chaperone regulator 3	Bag3	sp|Q9JLV1|BAG3_MOUSE BAG family molecular chaperone regulator 3 OS=Mus musculus OX=10090 GN=Bag3 PE=1 SV=2	11.426	10.9106	11.5739	11.5246	11.9983	11.4472	2751.5	1924.94	3048.53	2946.12	4091.18	2792.23	0.785895	-0.347591	0.256203	0.591416
Brevican core protein	Bcan	sp|Q61361|PGCB_MOUSE Brevican core protein OS=Mus musculus OX=10090 GN=Bcan PE=1 SV=2	15.2112	17.3041	15.247	15.003	14.2169	14.4833	37933.9	161828	38887	32836.2	19042	22903.8	3.19126	1.67412	0.25696	0.590134
Heterogeneous nuclear ribonucleoprotein L	Hnrnpl	sp|Q8R081|HNRPL_MOUSE Heterogeneous nuclear ribonucleoprotein L OS=Mus musculus OX=10090 GN=Hnrnpl PE=1 SV=2;tr|G3UY38|G3UY38_MOUSE Heterogeneous nuclear ribonucleoprotein L OS=Mus musculus OX=10090 GN=Hnrnpl PE=1 SV=1;tr|G5E924|G5E924_MOUSE Heterogeneous	11.9421	11.5872	11.0628	11.1678	11.4122	10.8405	3934.87	3076.77	2139.12	2300.61	2725.3	1833.65	1.33402	0.415775	0.257574	0.589099
Tryptophan--tRNA ligase, cytoplasmic;T1-TrpRS;T2-TrpRS	Wars	sp|P32921|SYWC_MOUSE Tryptophan--tRNA ligase, cytoplasmic OS=Mus musculus OX=10090 GN=Wars1 PE=1 SV=2	13.7103	12.7856	11.721	12.4563	11.2754	11.816	13403.3	7060.72	3375.77	5619.79	2478.76	3605.54	2.03688	1.02636	0.257902	0.588545
Insulin-degrading enzyme	Ide	sp|Q9JHR7|IDE_MOUSE Insulin-degrading enzyme OS=Mus musculus OX=10090 GN=Ide PE=1 SV=1;tr|F6RPJ9|F6RPJ9_MOUSE Insulin-degrading enzyme (Fragment) OS=Mus musculus OX=10090 GN=Ide PE=1 SV=1	12.3128	12.0712	12.2456	12.3026	11.4211	11.8311	5087.71	4303.22	4856.16	5051.86	2742.17	3643.48	1.24565	0.316894	0.258293	0.587887
Eukaryotic translation initiation factor 3 subunit F	Eif3f	sp|Q9DCH4|EIF3F_MOUSE Eukaryotic translation initiation factor 3 subunit F OS=Mus musculus OX=10090 GN=Eif3f PE=1 SV=2	13.3659	12.9968	12.7308	13.3095	13.1117	13.7651	10556.9	8173.85	6797.55	10152.2	8851.46	13922.2	0.775328	-0.367122	0.258929	0.58682
Eukaryotic translation initiation factor 2A;Eukaryotic translation initiation factor 2A, N-terminally processed	Eif2a	sp|Q8BJW6|EIF2A_MOUSE Eukaryotic translation initiation factor 2A OS=Mus musculus OX=10090 GN=Eif2a PE=1 SV=2;tr|D3YZZ6|D3YZZ6_MOUSE Eukaryotic translation initiation factor 2A (Fragment) OS=Mus musculus OX=10090 GN=Eif2a PE=1 SV=1	11.241	10.8969	11.0555	11.1798	10.5782	9.79749	2420.35	1906.75	2128.32	2319.82	1528.82	889.894	1.36232	0.44607	0.262778	0.580411
Tubulin-specific chaperone D	Tbcd	sp|Q8BYA0|TBCD_MOUSE Tubulin-specific chaperone D OS=Mus musculus OX=10090 GN=Tbcd PE=1 SV=1	11.2041	10.5953	11.6667	12.6034	11.1696	11.7839	2359.23	1547.05	3251.07	6223.02	2303.48	3526.2	0.593837	-0.75186	0.264369	0.57779
Vacuolar protein sorting-associated protein 45	Vps45	sp|P97390|VPS45_MOUSE Vacuolar protein sorting-associated protein 45 OS=Mus musculus OX=10090 GN=Vps45 PE=1 SV=1	11.9173	12.0251	11.9073	11.989	11.5306	11.7984	3867.81	4167.89	3841.09	4064.89	2958.4	3561.82	1.12203	0.166108	0.269981	0.568667
Histone-arginine methyltransferase CARM1	Carm1	sp|Q9WVG6|CARM1_MOUSE Histone-arginine methyltransferase CARM1 OS=Mus musculus OX=10090 GN=Carm1 PE=1 SV=2;tr|D3YUP1|D3YUP1_MOUSE Histone-arginine methyltransferase CARM1 OS=Mus musculus OX=10090 GN=Carm1 PE=1 SV=1	13.8932	13.8677	13.1934	13.9309	13.7912	14.1816	15214.9	14948.4	9367.19	15617.8	14176.4	18581.8	0.817152	-0.291323	0.270117	0.568448
ATP-dependent RNA helicase DDX39A	Ddx39a;Ddx39	sp|Q8VDW0|DX39A_MOUSE ATP-dependent RNA helicase DDX39A OS=Mus musculus OX=10090 GN=Ddx39a PE=1 SV=1;tr|D6RHT5|D6RHT5_MOUSE DEAD (Asp-Glu-Ala-Asp) box polypeptide 39 OS=Mus musculus OX=10090 GN=Ddx39 PE=1 SV=1	12.0231	11.9171	11.5333	11.8031	11.6233	10.9873	4162.11	3867.27	2963.94	3573.45	3154.73	2030.05	1.2552	0.327917	0.27182	0.565719
E3 ubiquitin-protein ligase TRIM23	Trim23	sp|Q8BGX0|TRI23_MOUSE E3 ubiquitin-protein ligase TRIM23 OS=Mus musculus OX=10090 GN=Trim23 PE=2 SV=1	9.86851	9.8153	10.0582	9.79081	11.501	10.4751	934.797	900.948	1066.15	885.783	2898.32	1423.37	0.557256	-0.843587	0.271973	0.565474
Secretory carrier-associated membrane protein 5	Scamp5	sp|Q9JKD3|SCAM5_MOUSE Secretory carrier-associated membrane protein 5 OS=Mus musculus OX=10090 GN=Scamp5 PE=1 SV=1;tr|A0A1L1SVG3|A0A1L1SVG3_MOUSE Secretory carrier-associated membrane protein OS=Mus musculus OX=10090 GN=Scamp5 PE=1 SV=1;tr|A0A1L1SRT6|A0A1L	9.74927	10.0315	10.7815	10.2754	10.7131	11.3003	860.642	1046.6	1760.17	1239.38	1678.67	2521.91	0.674164	-0.568829	0.273244	0.563449
RuvB-like 2	Ruvbl2	sp|Q9WTM5|RUVB2_MOUSE RuvB-like 2 OS=Mus musculus OX=10090 GN=Ruvbl2 PE=1 SV=3;tr|A0A1B0GT54|A0A1B0GT54_MOUSE RuvB-like helicase (Fragment) OS=Mus musculus OX=10090 GN=Ruvbl2 PE=1 SV=1;tr|A0A1B0GSR4|A0A1B0GSR4_MOUSE RuvB-like helicase (Fragment) OS=Mus mus	12.9583	12.0798	12.1598	12.1668	11.9559	11.8699	7958.61	4328.95	4575.77	4598.03	3972.69	3742.79	1.3695	0.453647	0.274405	0.561609
Dystrophin	Dmd	sp|P11531|DMD_MOUSE Dystrophin OS=Mus musculus OX=10090 GN=Dmd PE=1 SV=3;tr|A2A9Z1|A2A9Z1_MOUSE Dystrophin OS=Mus musculus OX=10090 GN=Dmd PE=1 SV=1;tr|A0A1Q1PRS4|A0A1Q1PRS4_MOUSE Dystrophin OS=Mus musculus OX=10090 GN=Dmd PE=1 SV=1;tr|A2A9Z2|A2A9Z2_MOUSE	10.527	10.531	10.7094	10.9173	11.2601	10.4592	1475.51	1479.61	1674.37	1933.9	2452.61	1407.77	0.798975	-0.323778	0.276869	0.557725
Ras-related protein Rab-8A	Rab8a	sp|P55258|RAB8A_MOUSE Ras-related protein Rab-8A OS=Mus musculus OX=10090 GN=Rab8a PE=1 SV=2	9.30256	9.08371	9.72469	10.1014	9.97942	9.20934	631.465	542.587	846.103	1098.56	1009.5	591.953	0.748203	-0.418499	0.277135	0.557309
U2 small nuclear ribonucleoprotein A	Snrpa1	sp|P57784|RU2A_MOUSE U2 small nuclear ribonucleoprotein A OS=Mus musculus OX=10090 GN=Snrpa1 PE=1 SV=2	14.3132	13.4717	13.586	13.9634	14.1642	14.4822	20356.5	11360.2	12296.8	15973.6	18359	22886.4	0.769212	-0.378546	0.277156	0.557276
Eukaryotic peptide chain release factor GTP-binding subunit ERF3A;Eukaryotic peptide chain release factor GTP-binding subunit ERF3B	Gspt1;Gspt2	sp|Q8R050|ERF3A_MOUSE Eukaryotic peptide chain release factor GTP-binding subunit ERF3A OS=Mus musculus OX=10090 GN=Gspt1 PE=1 SV=2;sp|Q149F3|ERF3B_MOUSE Eukaryotic peptide chain release factor GTP-binding subunit ERF3B OS=Mus musculus OX=10090 GN=Gspt2 PE	15.348	14.9257	15.1917	15.503	15.2203	15.3048	41706.9	31123.1	37424.6	46437.4	38173.9	40476.6	0.881418	-0.182102	0.277646	0.556508
Striatin-4	Strn4	sp|P58404|STRN4_MOUSE Striatin-4 OS=Mus musculus OX=10090 GN=Strn4 PE=1 SV=2;tr|V9GXE7|V9GXE7_MOUSE Striatin-4 (Fragment) OS=Mus musculus OX=10090 GN=Strn4 PE=1 SV=1	11.5429	10.3044	10.0714	9.79962	10.1036	10.0233	2983.73	1264.54	1075.95	891.209	1100.24	1040.67	1.75594	0.812245	0.278691	0.554877
Clustered mitochondria protein homolog	Cluh	sp|Q5SW19|CLU_MOUSE Clustered mitochondria protein homolog OS=Mus musculus OX=10090 GN=Cluh PE=1 SV=2;tr|Z4YLI8|Z4YLI8_MOUSE Clustered mitochondria protein homolog OS=Mus musculus OX=10090 GN=Cluh PE=1 SV=1;tr|A0A0R4J140|A0A0R4J140_MOUSE Clustered mitochon	13.7589	12.777	12.4591	12.7316	12.4242	12.0669	13862.5	7018.76	5630.71	6801.32	5496.13	4290.41	1.59827	0.676516	0.279315	0.553906
Traf2 and NCK-interacting protein kinase	Tnik	tr|E0CZD7|E0CZD7_MOUSE Traf2 and NCK-interacting protein kinase OS=Mus musculus OX=10090 GN=Tnik PE=1 SV=1;tr|E0CY98|E0CY98_MOUSE Traf2 and NCK-interacting protein kinase OS=Mus musculus OX=10090 GN=Tnik PE=1 SV=1;tr|E9PUL9|E9PUL9_MOUSE Traf2 and NCK-inter	9.55534	10.4354	10.7992	10.729	11.5579	10.4346	752.392	1384.74	1781.9	1697.27	3014.91	1383.97	0.642869	-0.637402	0.280952	0.551369
Tubulin gamma-1 chain;Tubulin gamma-2 chain	Tubg1;Tubg2	sp|P83887|TBG1_MOUSE Tubulin gamma-1 chain OS=Mus musculus OX=10090 GN=Tubg1 PE=1 SV=1;sp|Q8VCK3|TBG2_MOUSE Tubulin gamma-2 chain OS=Mus musculus OX=10090 GN=Tubg2 PE=1 SV=1	12.9033	12.0521	11.8151	12.3529	11.3494	10.3384	7660.91	4246.62	3603.29	5231.1	2609.21	1294.7	1.69795	0.763796	0.281799	0.550061
Noggin	Nog	sp|P97466|NOGG_MOUSE Noggin OS=Mus musculus OX=10090 GN=Nog PE=2 SV=1	11.2057	11.8639	13.8342	10.536	11.4609	10.8937	2361.85	3727.26	14605.3	1484.75	2818.87	1902.53	3.3345	1.73747	0.282638	0.548769
Cyclin-dependent kinase 17	Cdk17	sp|Q8K0D0|CDK17_MOUSE Cyclin-dependent kinase 17 OS=Mus musculus OX=10090 GN=Cdk17 PE=1 SV=2;tr|A0A1L1SUS7|A0A1L1SUS7_MOUSE Cyclin-dependent kinase 17 (Fragment) OS=Mus musculus OX=10090 GN=Cdk17 PE=1 SV=1	10.4764	10.9568	10.9103	11.2011	11.0208	10.8096	1424.66	1987.58	1924.54	2354.33	2077.74	1794.79	0.857059	-0.222534	0.284722	0.54558
Ras-related protein Rab-18	Rab18	sp|P35293|RAB18_MOUSE Ras-related protein Rab-18 OS=Mus musculus OX=10090 GN=Rab18 PE=1 SV=2;tr|A0A3Q4EI12|A0A3Q4EI12_MOUSE Ras-related protein Rab-18 OS=Mus musculus OX=10090 GN=Rab18 PE=1 SV=1;tr|A0A3Q4EIF7|A0A3Q4EIF7_MOUSE Ras-related protein Rab-18 OS=	12.5451	12.8375	12.9537	13.0169	13.3134	12.749	5976.56	7319.35	7933.27	8288.53	10179.6	6883.85	0.837376	-0.256052	0.28563	0.544196
Nucleolin	Ncl	sp|P09405|NUCL_MOUSE Nucleolin OS=Mus musculus OX=10090 GN=Ncl PE=1 SV=2	13.4575	14.139	14.6631	13.9065	13.6095	13.4428	11248.9	18041.1	25943.8	15355.8	12498.8	11134.9	1.41663	0.502465	0.288175	0.540344
ADP-ribosylation factor 5;ADP-ribosylation factor 4	Arf5;Arf4	sp|P84084|ARF5_MOUSE ADP-ribosylation factor 5 OS=Mus musculus OX=10090 GN=Arf5 PE=1 SV=2;sp|P61750|ARF4_MOUSE ADP-ribosylation factor 4 OS=Mus musculus OX=10090 GN=Arf4 PE=1 SV=2;tr|E9Q798|E9Q798_MOUSE ADP-ribosylation factor 4 OS=Mus musculus OX=10090 GN	11.211	10.5356	10.3368	9.14129	10.1614	10.7448	2370.54	1484.33	1293.26	564.68	1145.21	1715.96	1.50273	0.587587	0.28868	0.539584
Protein sprouty homolog 2	Spry2	sp|Q9QXV8|SPY2_MOUSE Protein sprouty homolog 2 OS=Mus musculus OX=10090 GN=Spry2 PE=1 SV=1	10.9543	9.23404	10.8873	12.2169	11.4172	10.1517	1984.14	602.175	1894.1	4760.51	2734.76	1137.54	0.518999	-0.946196	0.291247	0.535738
Microtubule-associated protein RP/EB family member 1	Mapre1	sp|Q61166|MARE1_MOUSE Microtubule-associated protein RP/EB family member 1 OS=Mus musculus OX=10090 GN=Mapre1 PE=1 SV=3	13.131	12.9183	13.3328	12.5676	13.0369	13.0633	8970.67	7740.98	10317.5	6070.5	8404.23	8559.44	1.17344	0.230738	0.291249	0.535735
Calsyntenin-1;Soluble Alc-alpha;CTF1-alpha	Clstn1	sp|Q9EPL2|CSTN1_MOUSE Calsyntenin-1 OS=Mus musculus OX=10090 GN=Clstn1 PE=1 SV=1	10.6315	11.0969	10.5749	9.51714	9.84868	10.9717	1586.36	2190.28	1525.32	732.731	922.036	2008.22	1.44744	0.533506	0.291964	0.534671
Protein transport protein Sec31A	Sec31a	sp|Q3UPL0|SC31A_MOUSE Protein transport protein Sec31A OS=Mus musculus OX=10090 GN=Sec31a PE=1 SV=2;tr|S4R2A9|S4R2A9_MOUSE Protein transport protein Sec31A (Fragment) OS=Mus musculus OX=10090 GN=Sec31a PE=1 SV=1	14.2602	12.7391	13.2599	13.0475	12.7108	12.754	19622.2	6836.77	9809.07	8466.21	6703.97	6907.75	1.64273	0.716095	0.292222	0.534288
Disco-interacting protein 2 homolog B	Dip2b	sp|Q3UH60|DIP2B_MOUSE Disco-interacting protein 2 homolog B OS=Mus musculus OX=10090 GN=Dip2b PE=1 SV=1	16.8364	17.3837	17.1427	17.2262	17.7373	17.2557	117020	171007	144699	153321	218504	156489	0.819072	-0.287938	0.292832	0.533381
Protocadherin beta 10	Pcdhb10	tr|Q91VE5|Q91VE5_MOUSE Protocadherin beta 10 OS=Mus musculus OX=10090 GN=Pcdhb10 PE=2 SV=1	9.09598	9.53688	9.43483	9.12488	9.95479	9.97169	547.221	742.826	692.097	558.294	992.408	1004.1	0.77585	-0.366151	0.293444	0.532475
Vigilin	Hdlbp	sp|Q8VDJ3|VIGLN_MOUSE Vigilin OS=Mus musculus OX=10090 GN=Hdlbp PE=1 SV=1;tr|A0A087WP83|A0A087WP83_MOUSE Vigilin OS=Mus musculus OX=10090 GN=Hdlbp PE=1 SV=1	11.6676	11.4248	11.0353	11.2206	10.2958	11.3189	3253.1	2749.21	2098.73	2386.37	1257.03	2554.63	1.30704	0.386298	0.294992	0.53019
Gamma-adducin	Add3	sp|Q9QYB5|ADDG_MOUSE Gamma-adducin OS=Mus musculus OX=10090 GN=Add3 PE=1 SV=2;tr|A0A494B9K4|A0A494B9K4_MOUSE Gamma-adducin OS=Mus musculus OX=10090 GN=Add3 PE=1 SV=1	9.00758	9.12235	10.2929	9.92659	10.3496	9.96067	514.697	557.315	1254.5	973.198	1304.79	996.461	0.710506	-0.493081	0.295134	0.529981
DCC-interacting protein 13-beta	Appl2	sp|Q8K3G9|DP13B_MOUSE DCC-interacting protein 13-beta OS=Mus musculus OX=10090 GN=Appl2 PE=1 SV=1;tr|H3BL43|H3BL43_MOUSE DCC-interacting protein 13-beta (Fragment) OS=Mus musculus OX=10090 GN=Appl2 PE=1 SV=1;tr|D6RFR7|D6RFR7_MOUSE DCC-interacting protein 1	9.68148	9.44902	9.91468	9.35305	11.2269	10.3313	821.137	698.938	965.197	653.956	2396.81	1288.34	0.572761	-0.803995	0.296442	0.528061
Regulator of chromosome condensation	Rcc1	sp|Q8VE37|RCC1_MOUSE Regulator of chromosome condensation OS=Mus musculus OX=10090 GN=Rcc1 PE=1 SV=1;tr|Q6PFB2|Q6PFB2_MOUSE Rcc1 protein OS=Mus musculus OX=10090 GN=Rcc1 PE=1 SV=1	14.2065	13.3743	12.8867	13.3551	12.9408	12.4407	18905.3	10618.6	7573.27	10478.2	7862.65	5559.35	1.55217	0.634285	0.297051	0.52717
Cystatin-B	Cstb	sp|Q62426|CYTB_MOUSE Cystatin-B OS=Mus musculus OX=10090 GN=Cstb PE=1 SV=1	10.6541	9.6048	11.1019	11.8486	11.2598	10.3633	1611.4	778.633	2197.88	3687.94	2452.1	1317.24	0.615227	-0.700809	0.297302	0.526803
60S ribosomal protein L4	Rpl4	sp|Q9D8E6|RL4_MOUSE 60S ribosomal protein L4 OS=Mus musculus OX=10090 GN=Rpl4 PE=1 SV=3	12.7612	12.0077	14.3307	11.867	12.3146	12.139	6942.31	4117.92	20604.9	3735.28	5094.06	4510.28	2.37377	1.24718	0.297613	0.526347
Splicing factor 3B subunit 1	Sf3b1	sp|Q99NB9|SF3B1_MOUSE Splicing factor 3B subunit 1 OS=Mus musculus OX=10090 GN=Sf3b1 PE=1 SV=1;tr|G5E866|G5E866_MOUSE Splicing factor 3B subunit 1 OS=Mus musculus OX=10090 GN=Sf3b1 PE=1 SV=1	15.148	14.3143	14.5462	14.3583	14.3507	14.3834	36308	20372	23924.5	21002.9	20892.5	21371.5	1.27404	0.349409	0.297755	0.52614
TNF receptor-associated factor 4	Traf4	sp|Q61382|TRAF4_MOUSE TNF receptor-associated factor 4 OS=Mus musculus OX=10090 GN=Traf4 PE=1 SV=2	12.6918	12.1371	12.5153	12.1289	13.0707	13.7065	6616.26	4504.34	5854.38	4478.81	8603.45	13368	0.641769	-0.639875	0.29785	0.526002
ADP-ribosylation factor-like protein 1	Arl1	sp|P61211|ARL1_MOUSE ADP-ribosylation factor-like protein 1 OS=Mus musculus OX=10090 GN=Arl1 PE=1 SV=1;tr|F8WIB1|F8WIB1_MOUSE ADP-ribosylation factor-like protein 1 (Fragment) OS=Mus musculus OX=10090 GN=Arl1 PE=1 SV=1	11.6136	10.4266	10.9254	10.1329	11.0413	9.93215	3133.59	1376.32	1944.79	1122.81	2107.48	976.956	1.53419	0.617475	0.298658	0.524825
Protein NDRG3	Ndrg3	sp|Q9QYF9|NDRG3_MOUSE Protein NDRG3 OS=Mus musculus OX=10090 GN=Ndrg3 PE=1 SV=1;tr|Q8VCV2|Q8VCV2_MOUSE Ndrg3 protein OS=Mus musculus OX=10090 GN=Ndrg3 PE=1 SV=1	12.5026	12.2757	12.275	11.7812	12.5285	11.4018	5803.07	4958.54	4956.14	3519.61	5908.19	2705.73	1.2954	0.373396	0.298812	0.524603
Cathepsin D	Ctsd	sp|P18242|CATD_MOUSE Cathepsin D OS=Mus musculus OX=10090 GN=Ctsd PE=1 SV=1;tr|F8WIR1|F8WIR1_MOUSE Cathepsin D OS=Mus musculus OX=10090 GN=Ctsd PE=1 SV=2;tr|F6Y6L6|F6Y6L6_MOUSE Predicted gene, 49369 (Fragment) OS=Mus musculus OX=10090 GN=Gm49369 PE=1 SV=1	13.9292	13.4839	13.6381	13.4591	13.1101	13.702	15599.4	11456.7	12749	11261.4	8841.65	13326.4	1.19072	0.251832	0.299046	0.524262
Sodium/potassium-transporting ATPase subunit alpha-2;Sodium/potassium-transporting ATPase subunit alpha-3	Atp1a2;Atp1a3	sp|Q6PIE5|AT1A2_MOUSE Sodium/potassium-transporting ATPase subunit alpha-2 OS=Mus musculus OX=10090 GN=Atp1a2 PE=1 SV=1;tr|D3YYN7|D3YYN7_MOUSE Sodium/potassium-transporting ATPase subunit alpha OS=Mus musculus OX=10090 GN=Atp1a2 PE=1 SV=1;sp|Q6PIC6|AT1A3_M	14.4469	14.5438	14.8364	15.0524	14.8988	14.5446	22333.2	23884.7	29255.1	33980	30548.2	23898	0.853514	-0.228514	0.299709	0.5233
Glia-derived nexin	Serpine2	sp|Q07235|GDN_MOUSE Glia-derived nexin OS=Mus musculus OX=10090 GN=Serpine2 PE=1 SV=2;tr|A0A087WQ70|A0A087WQ70_MOUSE Glia-derived nexin (Fragment) OS=Mus musculus OX=10090 GN=Serpine2 PE=1 SV=1	19.8944	18.3824	20.166	18.6265	17.9304	19.576	974566	341707	1.17644e+06	404702	249798	781562	1.7358	0.795601	0.301164	0.521197
Tenascin-R	Tnr	sp|Q8BYI9|TENR_MOUSE Tenascin-R OS=Mus musculus OX=10090 GN=Tnr PE=1 SV=2	13.9559	16.1754	14.8509	14.3808	14.0679	14.1666	15890.8	74008.3	29550.6	21333	17173.5	18389.6	2.09943	1.07	0.301425	0.520821
Nuclear pore complex protein Nup93	Nup93	sp|Q8BJ71|NUP93_MOUSE Nuclear pore complex protein Nup93 OS=Mus musculus OX=10090 GN=Nup93 PE=1 SV=1	8.94478	9.44753	10.6252	11.0689	10.0982	10.2285	492.773	698.216	1579.44	2148.18	1096.13	1199.73	0.623403	-0.681762	0.303043	0.518496
Glycogenin-1	Gyg1;Gyg	sp|Q9R062|GLYG_MOUSE Glycogenin-1 OS=Mus musculus OX=10090 GN=Gyg1 PE=1 SV=3;tr|K3W4S6|K3W4S6_MOUSE Glycogenin OS=Mus musculus OX=10090 GN=Gyg PE=1 SV=1;tr|V9GX26|V9GX26_MOUSE Glycogenin (Fragment) OS=Mus musculus OX=10090 GN=Gyg PE=1 SV=1	12.5218	11.8431	12.8809	13.5717	13.1011	12.2078	5880.81	3673.91	7542.88	12175.6	8786.67	4730.58	0.665463	-0.58757	0.303088	0.518432
Glycogen synthase kinase-3 beta	Gsk3b	sp|Q9WV60|GSK3B_MOUSE Glycogen synthase kinase-3 beta OS=Mus musculus OX=10090 GN=Gsk3b PE=1 SV=2;tr|E9QAQ5|E9QAQ5_MOUSE Glycogen synthase kinase-3 beta OS=Mus musculus OX=10090 GN=Gsk3b PE=1 SV=1	11.3961	10.6004	10.8112	12.1614	10.9569	11.3056	2695.06	1552.52	1796.78	4580.85	1987.72	2531.19	0.664233	-0.590239	0.303125	0.518378
Presenilin-1;Presenilin-1 NTF subunit;Presenilin-1 CTF subunit;Presenilin-1 CTF12	Psen1	sp|P49769|PSN1_MOUSE Presenilin-1 OS=Mus musculus OX=10090 GN=Psen1 PE=1 SV=1	10.4074	10.5142	10.3246	11.7468	10.7947	10.2748	1358.12	1462.48	1282.37	3436.68	1776.35	1238.86	0.635934	-0.653052	0.303383	0.518008
Integrator complex subunit 7	Ints7	sp|Q7TQK1|INT7_MOUSE Integrator complex subunit 7 OS=Mus musculus OX=10090 GN=Ints7 PE=1 SV=1;tr|A0A0R4J0E4|A0A0R4J0E4_MOUSE Integrator complex subunit 7 OS=Mus musculus OX=10090 GN=Ints7 PE=1 SV=1	11.1299	9.66869	9.93275	9.89705	8.97395	9.817	2240.96	813.89	977.363	953.474	502.838	902.01	1.70978	0.77381	0.303404	0.517978
Signal transducing adapter molecule 1;Signal transducing adapter molecule 2	Stam;Stam2	sp|P70297|STAM1_MOUSE Signal transducing adapter molecule 1 OS=Mus musculus OX=10090 GN=Stam PE=1 SV=3;tr|Q3UGN9|Q3UGN9_MOUSE Signal transducing adapter molecule 1 OS=Mus musculus OX=10090 GN=Stam PE=1 SV=1;sp|O88811|STAM2_MOUSE Signal transducing adapter	14.7402	13.4735	14.2096	13.7254	13.8091	13.7211	27368	11374.4	18945.9	13544.3	14353.4	13504	1.39338	0.478589	0.305809	0.51455
Calcitonin gene-related peptide type 1 receptor	Calcrl	sp|Q9R1W5|CALRL_MOUSE Calcitonin gene-related peptide type 1 receptor OS=Mus musculus OX=10090 GN=Calcrl PE=1 SV=2	11.4361	11.6365	11.9748	11.6478	12.1556	12.0058	2770.83	3183.72	4025.08	3208.76	4562.47	4112.5	0.839772	-0.25193	0.307199	0.51258
Dihydropteridine reductase	Qdpr	sp|Q8BVI4|DHPR_MOUSE Dihydropteridine reductase OS=Mus musculus OX=10090 GN=Qdpr PE=1 SV=2;tr|A0A0G2JGY0|A0A0G2JGY0_MOUSE Dihydropteridine reductase OS=Mus musculus OX=10090 GN=Qdpr PE=1 SV=1;tr|D3Z1A1|D3Z1A1_MOUSE Dihydropteridine reductase (Fragment) OS=	11.0757	10.3857	9.79936	10.1107	10.2713	9.11266	2158.33	1337.85	891.048	1105.67	1235.86	553.585	1.51539	0.599691	0.307809	0.511719
60S ribosomal protein L15;Ribosomal protein L15	Rpl15	sp|Q9CZM2|RL15_MOUSE 60S ribosomal protein L15 OS=Mus musculus OX=10090 GN=Rpl15 PE=1 SV=4;tr|B8JKK2|B8JKK2_MOUSE Ribosomal protein L15 (Fragment) OS=Mus musculus OX=10090 GN=Rpl15 PE=1 SV=1	12.0736	12.4221	13.0372	12.0552	12.5422	11.27	4310.38	5488.13	8405.98	4255.76	5964.56	2469.49	1.43458	0.520624	0.309632	0.509154
Guanine nucleotide-binding protein G(k) subunit alpha	Gnai3	sp|Q9DC51|GNAI3_MOUSE Guanine nucleotide-binding protein G(i) subunit alpha OS=Mus musculus OX=10090 GN=Gnai3 PE=1 SV=3	13.3092	13.5062	14.0014	13.7012	14.3835	13.8139	10150.1	11635.1	16399.9	13319	21373	14401.2	0.777809	-0.362513	0.312657	0.504932
Transcription elongation factor B polypeptide 1	Tceb1	sp|P83940|ELOC_MOUSE Elongin-C OS=Mus musculus OX=10090 GN=Eloc PE=1 SV=1;tr|A0A087WQE6|A0A087WQE6_MOUSE Elongin-C (Fragment) OS=Mus musculus OX=10090 GN=Eloc PE=1 SV=1;tr|A0A087WNT1|A0A087WNT1_MOUSE Elongin-C OS=Mus musculus OX=10090 GN=Eloc PE=1 SV=1;tr|	12.8803	13.4702	12.4521	12.8247	12.2706	12.5556	7539.74	11348.4	5603.45	7254.7	4941.04	6020.22	1.34451	0.427083	0.313304	0.504033
Receptor-type tyrosine-protein phosphatase zeta;Protein-tyrosine-phosphatase	Ptprz1	sp|B9EKR1|PTPRZ_MOUSE Receptor-type tyrosine-protein phosphatase zeta OS=Mus musculus OX=10090 GN=Ptprz1 PE=1 SV=1;tr|B2RXS8|B2RXS8_MOUSE Ptprz1 protein OS=Mus musculus OX=10090 GN=Ptprz1 PE=1 SV=1;tr|A0A0J9YVD2|A0A0J9YVD2_MOUSE Receptor-type tyrosine-prot	12.5286	13.1237	12.9288	13.1393	12.9368	13.156	5908.6	8925.39	7797.52	9022.43	7840.88	9127.47	0.870751	-0.199667	0.313452	0.503829
Peroxidasin homolog	Pxdn	sp|Q3UQ28|PXDN_MOUSE Peroxidasin homolog OS=Mus musculus OX=10090 GN=Pxdn PE=1 SV=2;tr|A0A1W2P6L9|A0A1W2P6L9_MOUSE Peroxidasin homolog OS=Mus musculus OX=10090 GN=Pxdn PE=1 SV=1	12.1058	11.1783	12.2439	11.4889	10.0985	11.8831	4407.67	2317.41	4850.44	2874.11	1096.36	3777.2	1.49407	0.579244	0.314084	0.502955
Actin, cytoplasmic 2;Actin, cytoplasmic 2, N-terminally processed	Actg1	sp|P63260|ACTG_MOUSE Actin, cytoplasmic 2 OS=Mus musculus OX=10090 GN=Actg1 PE=1 SV=1;tr|B1ATY1|B1ATY1_MOUSE Actin, cytoplasmic 2 OS=Mus musculus OX=10090 GN=Actg1 PE=1 SV=1	15.705	14.2134	14.6942	14.4616	14.4054	14.1745	53416.6	18995.9	26509.1	22561.9	21699.9	18490.5	1.57638	0.656616	0.315761	0.500642
Translin	Tsn	sp|Q62348|TSN_MOUSE Translin OS=Mus musculus OX=10090 GN=Tsn PE=1 SV=1	13.0303	12.7052	13.5034	12.9987	12.858	12.3501	8365.87	6678	11612.6	8184.62	7424.1	5220.96	1.27973	0.355843	0.316724	0.499319
cAMP-dependent protein kinase type I-alpha regulatory subunit;cAMP-dependent protein kinase type I-alpha regulatory subunit, N-terminally processed	Prkar1a	sp|Q9DBC7|KAP0_MOUSE cAMP-dependent protein kinase type I-alpha regulatory subunit OS=Mus musculus OX=10090 GN=Prkar1a PE=1 SV=3	11.6135	10.4945	11.9514	12.1154	13.1247	11.1582	3133.37	1442.64	3960.32	4437.1	8931.58	2285.35	0.545312	-0.874846	0.320395	0.494315
Angiopoietin-2	Angpt2	sp|O35608|ANGP2_MOUSE Angiopoietin-2 OS=Mus musculus OX=10090 GN=Angpt2 PE=2 SV=2	11.7517	10.8194	11.3747	11.4422	11.9427	11.6222	3448.37	1807.02	2655.38	2782.57	3936.51	3152.32	0.801383	-0.319436	0.325311	0.487701
Sushi domain-containing protein 2	Susd2	sp|Q9DBX3|SUSD2_MOUSE Sushi domain-containing protein 2 OS=Mus musculus OX=10090 GN=Susd2 PE=1 SV=1	11.6861	12.2644	12.1662	11.8642	12.429	13.2904	3295.09	4919.85	4596.12	3728.04	5514.45	10018.6	0.665125	-0.588303	0.329091	0.482684
Nidogen-2	Nid2	sp|O88322|NID2_MOUSE Nidogen-2 OS=Mus musculus OX=10090 GN=Nid2 PE=1 SV=2;tr|A0A286YCQ5|A0A286YCQ5_MOUSE Nidogen-2 (Fragment) OS=Mus musculus OX=10090 GN=Nid2 PE=1 SV=1	13.7958	13.8944	14.6384	14.299	14.3649	14.8096	14221.6	15227.6	25503.4	20157.1	21099.2	28716.7	0.785341	-0.348609	0.329137	0.482624
H/ACA ribonucleoprotein complex subunit 4	Dkc1	sp|Q9ESX5|DKC1_MOUSE H/ACA ribonucleoprotein complex subunit DKC1 OS=Mus musculus OX=10090 GN=Dkc1 PE=1 SV=4;tr|B7ZCL7|B7ZCL7_MOUSE H/ACA ribonucleoprotein complex subunit DKC1 (Fragment) OS=Mus musculus OX=10090 GN=Dkc1 PE=1 SV=1;tr|F6S1S5|F6S1S5_MOUSE H/	9.76328	11.1542	10.6542	9.88003	10.2209	10.2708	869.041	2279.02	1611.51	942.292	1193.43	1235.43	1.41185	0.49759	0.329672	0.481918
Vimentin	Vim	sp|P20152|VIME_MOUSE Vimentin OS=Mus musculus OX=10090 GN=Vim PE=1 SV=3;tr|A0A0A6YWC8|A0A0A6YWC8_MOUSE Vimentin OS=Mus musculus OX=10090 GN=Vim PE=1 SV=1	15.8759	17.8841	16.4843	16.3233	15.7807	16.0559	60134.3	241908	91678.8	81997.9	56294.3	68125.2	1.9074	0.93161	0.331649	0.479321
Protocadherin Fat 2	Fat2	sp|Q5F226|FAT2_MOUSE Protocadherin Fat 2 OS=Mus musculus OX=10090 GN=Fat2 PE=1 SV=1	12.4355	13.1256	12.9888	13.9667	13.481	12.463	5539.35	8937.16	8128.65	16010.2	11433.7	5645.95	0.683146	-0.549734	0.331984	0.478883
Agrin;Agrin N-terminal 110 kDa subunit;Agrin C-terminal 110 kDa subunit;Agrin C-terminal 90 kDa fragment;Agrin C-terminal 22 kDa fragment	Agrn	tr|M0QWP1|M0QWP1_MOUSE Agrin OS=Mus musculus OX=10090 GN=Agrn PE=1 SV=1;sp|A2ASQ1|AGRIN_MOUSE Agrin OS=Mus musculus OX=10090 GN=Agrn PE=1 SV=1;tr|Z4YK85|Z4YK85_MOUSE Agrin OS=Mus musculus OX=10090 GN=Agrn PE=1 SV=1	17.0624	16.5754	18.7788	16.3601	16.4103	17.0948	136866	97654.6	449761	84116.4	87094.9	139974	2.19895	1.13682	0.332399	0.47834
Serine-threonine kinase receptor-associated protein	Strap	sp|Q9Z1Z2|STRAP_MOUSE Serine-threonine kinase receptor-associated protein OS=Mus musculus OX=10090 GN=Strap PE=1 SV=2	15.196	16.1181	14.5046	14.9122	14.7113	14.7346	37536.3	71126.5	23244.5	30833.3	26825.2	27261.9	1.55331	0.635342	0.333378	0.477063
DNA replication ATP-dependent helicase/nuclease DNA2;DNA replication nuclease DNA2;DNA replication ATP-dependent helicase DNA2	Dna2	sp|Q6ZQJ5|DNA2_MOUSE DNA replication ATP-dependent helicase/nuclease DNA2 OS=Mus musculus OX=10090 GN=Dna2 PE=1 SV=2	13.2271	13.9308	13.7647	14.068	14.3397	13.5143	9588.57	15616.7	13918.3	17174.7	20733.8	11700.6	0.788636	-0.342569	0.333632	0.476732
Lys-63-specific deubiquitinase BRCC36	Brcc3	sp|P46737|BRCC3_MOUSE Lys-63-specific deubiquitinase BRCC36 OS=Mus musculus OX=10090 GN=Brcc3 PE=1 SV=1	11.143	10.7926	9.65408	10.4015	9.83448	10.1135	2261.4	1773.77	805.689	1352.58	913.006	1107.81	1.43501	0.521058	0.334621	0.475447
Septin-7	SEPT7	sp|O55131|SEPT7_MOUSE Septin-7 OS=Mus musculus OX=10090 GN=Septin7 PE=1 SV=1;tr|E9Q9F5|E9Q9F5_MOUSE Septin-7 OS=Mus musculus OX=10090 GN=Septin7 PE=1 SV=2;tr|E9Q1G8|E9Q1G8_MOUSE Septin-7 OS=Mus musculus OX=10090 GN=Septin7 PE=1 SV=2	13.4738	14.2372	12.7743	13.4167	12.8762	12.7176	11376.7	19311.9	7005.63	10935.3	7518.35	6735.64	1.49644	0.581536	0.337144	0.472184
60S ribosomal protein L18	Rpl18	sp|P35980|RL18_MOUSE 60S ribosomal protein L18 OS=Mus musculus OX=10090 GN=Rpl18 PE=1 SV=3;tr|A0A1B0GSF7|A0A1B0GSF7_MOUSE 60S ribosomal protein L18 OS=Mus musculus OX=10090 GN=Rpl18 PE=1 SV=1;tr|A0A1B0GQU8|A0A1B0GQU8_MOUSE 60S ribosomal protein L18 OS=Mus	13.4567	12.7978	14.5091	13.1161	13.2799	12.7031	11242.7	7120.68	23317.1	8878.5	9946	6668.28	1.63499	0.709283	0.337347	0.471923
Latent-transforming growth factor beta-binding protein 4	Ltbp4	sp|Q8K4G1|LTBP4_MOUSE Latent-transforming growth factor beta-binding protein 4 OS=Mus musculus OX=10090 GN=Ltbp4 PE=1 SV=2;tr|E9Q6B8|E9Q6B8_MOUSE Latent-transforming growth factor beta-binding protein 4 OS=Mus musculus OX=10090 GN=Ltbp4 PE=1 SV=1;tr|D3Z598	11.4029	11.3429	11.4907	10.8819	11.5005	11.2376	2707.79	2597.49	2877.7	1887.03	2897.31	2414.65	1.13668	0.18483	0.339804	0.468772
Cerebral cavernous malformations protein 2 homolog	Ccm2	sp|Q8K2Y9|CCM2_MOUSE Cerebral cavernous malformations protein 2 homolog OS=Mus musculus OX=10090 GN=Ccm2 PE=1 SV=1;tr|F7AVU1|F7AVU1_MOUSE Cerebral cavernous malformations protein 2 homolog OS=Mus musculus OX=10090 GN=Ccm2 PE=1 SV=2;tr|E0CXR5|E0CXR5_MOUSE C	12.7564	12.526	13.178	12.8393	13.1979	13.1765	6919.25	5897.96	9267.73	7328.49	9396.45	9258.1	0.849975	-0.234507	0.33991	0.468636
Large neutral amino acids transporter small subunit 1	Slc7a5	sp|Q9Z127|LAT1_MOUSE Large neutral amino acids transporter small subunit 1 OS=Mus musculus OX=10090 GN=Slc7a5 PE=1 SV=2	9.37794	10.0039	11.1676	10.4773	11.8843	10.7071	665.336	1026.77	2300.29	1425.55	3780.34	1671.7	0.580494	-0.784647	0.343946	0.463509
Spermatogenesis-associated protein 5;Katanin p60 ATPase-containing subunit A-like 2	Spata5;Katnal2	sp|Q3UMC0|AFG2H_MOUSE ATPase family protein 2 homolog OS=Mus musculus OX=10090 GN=Spata5 PE=1 SV=2;sp|Q9D3R6|KATL2_MOUSE Katanin p60 ATPase-containing subunit A-like 2 OS=Mus musculus OX=10090 GN=Katnal2 PE=2 SV=2;tr|D3Z0U5|D3Z0U5_MOUSE Katanin p60 ATPase-	11.3532	14.9267	11.0665	10.6503	9.3513	11.4851	2616.1	31144.7	2144.61	1607.16	653.163	2866.55	7.00337	2.80805	0.345877	0.461079
40S ribosomal protein S17	Rps17	sp|P63276|RS17_MOUSE 40S ribosomal protein S17 OS=Mus musculus OX=10090 GN=Rps17 PE=1 SV=2	14.0093	13.5016	13.5394	13.653	13.4933	13.2577	16490	11598.1	11906	12881.4	11531.6	9794.12	1.16917	0.225491	0.348186	0.458188
60S ribosomal protein L17	Rpl17;Gm6133	sp|Q9CPR4|RL17_MOUSE 60S ribosomal protein L17 OS=Mus musculus OX=10090 GN=Rpl17 PE=1 SV=3;tr|Q6ZWZ7|Q6ZWZ7_MOUSE 60S ribosomal protein L17 OS=Mus musculus OX=10090 GN=Rpl17 PE=1 SV=1;tr|B2RY53|B2RY53_MOUSE EG620155 protein OS=Mus musculus OX=10090 GN=Gm61	13.8477	13.2938	15.0736	13.5897	13.5918	13.3842	14742.6	10042.3	34483.1	12328.4	12346.4	10691.7	1.67582	0.744869	0.348418	0.4579
N-alpha-acetyltransferase 15, NatA auxiliary subunit	Naa15	sp|Q80UM3|NAA15_MOUSE N-alpha-acetyltransferase 15, NatA auxiliary subunit OS=Mus musculus OX=10090 GN=Naa15 PE=1 SV=1;tr|A0A0A6YW80|A0A0A6YW80_MOUSE N-alpha-acetyltransferase 15, NatA auxiliary subunit OS=Mus musculus OX=10090 GN=Naa15 PE=1 SV=1;tr|G3X8Y3	10.1825	9.51579	10.1026	10.3147	10.8603	9.76126	1162.09	732.046	1099.48	1273.6	1858.99	867.825	0.748324	-0.418265	0.350006	0.455925
Acetoacetyl-CoA synthetase	Aacs	sp|Q9D2R0|AACS_MOUSE Acetoacetyl-CoA synthetase OS=Mus musculus OX=10090 GN=Aacs PE=1 SV=1	10.862	9.94217	9.27648	9.8705	9.74073	8.59111	1861.18	983.765	620.153	936.088	855.563	385.64	1.59147	0.670361	0.350389	0.455449
Prostaglandin E synthase 3	Ptges3	sp|Q9R0Q7|TEBP_MOUSE Prostaglandin E synthase 3 OS=Mus musculus OX=10090 GN=Ptges3 PE=1 SV=1;tr|D3Z7C6|D3Z7C6_MOUSE Prostaglandin E synthase 3 OS=Mus musculus OX=10090 GN=Ptges3 PE=1 SV=1	12.6657	12.3535	11.9085	12.0294	12.1145	12.142	6497.64	5233.28	3844.29	4180.33	4434.33	4519.66	1.18584	0.24591	0.351917	0.45356
Fibulin-2	Fbln2	sp|P37889|FBLN2_MOUSE Fibulin-2 OS=Mus musculus OX=10090 GN=Fbln2 PE=1 SV=2	15.5338	14.7499	15.1483	14.8305	14.5076	15.1715	47439.5	27552.6	36315.6	29135.7	23292.9	36904.3	1.24599	0.31729	0.352915	0.45233
Adenylate kinase isoenzyme 1	Ak1	sp|Q9R0Y5|KAD1_MOUSE Adenylate kinase isoenzyme 1 OS=Mus musculus OX=10090 GN=Ak1 PE=1 SV=1;tr|Z4YN97|Z4YN97_MOUSE Adenylate kinase isoenzyme 1 (Fragment) OS=Mus musculus OX=10090 GN=Ak1 PE=1 SV=1	12.5435	13.3285	13.0672	13.5408	13.4193	12.9002	5969.94	10286.8	8582.61	11917.5	10955	7644.47	0.813949	-0.296989	0.353084	0.452122
Cilia- and flagella-associated protein 36	Cfap36	sp|Q8C6E0|CFA36_MOUSE Cilia- and flagella-associated protein 36 OS=Mus musculus OX=10090 GN=Cfap36 PE=1 SV=1;tr|Q5SNY8|Q5SNY8_MOUSE Cilia- and flagella-associated protein 36 (Fragment) OS=Mus musculus OX=10090 GN=Cfap36 PE=1 SV=8	10.8428	10.9122	11.131	11.077	10.9128	11.9922	1836.57	1927.08	2242.67	2160.28	1927.88	4073.91	0.735882	-0.442454	0.357091	0.447221
Teneurin-3	Tenm3	sp|Q9WTS6|TEN3_MOUSE Teneurin-3 OS=Mus musculus OX=10090 GN=Tenm3 PE=1 SV=1;tr|B7ZNJ5|B7ZNJ5_MOUSE Odz3 protein OS=Mus musculus OX=10090 GN=Tenm3 PE=1 SV=1;tr|G3X907|G3X907_MOUSE Teneurin-3 OS=Mus musculus OX=10090 GN=Tenm3 PE=1 SV=1	12.4988	12.0006	12.2545	12.2081	12.8323	12.4386	5787.8	4097.7	4886.21	4731.56	7293.02	5551.26	0.840456	-0.250756	0.357334	0.446925
Renin receptor	Atp6ap2	sp|Q9CYN9|RENR_MOUSE Renin receptor OS=Mus musculus OX=10090 GN=Atp6ap2 PE=1 SV=2	12.7483	11.9865	13.3262	12.2084	11.6628	12.7295	6880.51	4057.85	10270.4	4732.54	3242.3	6791.43	1.4363	0.522353	0.358079	0.446021
Peroxiredoxin-6	Prdx6	sp|O08709|PRDX6_MOUSE Peroxiredoxin-6 OS=Mus musculus OX=10090 GN=Prdx6 PE=1 SV=3;tr|Q6GT24|Q6GT24_MOUSE Peroxiredoxin OS=Mus musculus OX=10090 GN=Prdx6 PE=1 SV=1;tr|D3Z0Y2|D3Z0Y2_MOUSE Peroxiredoxin OS=Mus musculus OX=10090 GN=Prdx6 PE=1 SV=1	16.0019	16.143	16.0249	16.3629	16.1505	16.0029	65622.4	72364.8	66676.9	84279.8	72742	65667.9	0.919055	-0.121777	0.359792	0.443948
Wiskott-Aldrich syndrome protein family member 2	Wasf2	sp|Q8BH43|WASF2_MOUSE Wiskott-Aldrich syndrome protein family member 2 OS=Mus musculus OX=10090 GN=Wasf2 PE=1 SV=1	12.4179	11.6268	12.0514	11.4395	12.0123	11.8024	5472.18	3162.39	4244.56	2777.36	4131.07	3571.71	1.22891	0.297377	0.360026	0.443666
Eukaryotic translation initiation factor 4E	Eif4e	sp|P63073|IF4E_MOUSE Eukaryotic translation initiation factor 4E OS=Mus musculus OX=10090 GN=Eif4e PE=1 SV=1;tr|A0A0G2JFB4|A0A0G2JFB4_MOUSE Eukaryotic translation initiation factor 4E OS=Mus musculus OX=10090 GN=Eif4e PE=1 SV=1;tr|A0A0G2JH04|A0A0G2JH04_MOU	10.9615	13.1965	10.4086	11.174	10.0615	10.3926	1994.07	9387.34	1359.25	2310.52	1068.6	1344.26	2.69736	1.43155	0.362786	0.44035
E3 ubiquitin-protein ligase TRIM32	Trim32	sp|Q8CH72|TRI32_MOUSE E3 ubiquitin-protein ligase TRIM32 OS=Mus musculus OX=10090 GN=Trim32 PE=1 SV=2	11.7433	9.38113	10.712	11.97	11.5732	10.8561	3428.35	666.809	1677.39	4011.71	3047.06	1853.58	0.647703	-0.626596	0.362834	0.440292
Receptor-type tyrosine-protein phosphatase alpha;Receptor-type tyrosine-protein phosphatase	Ptpra	sp|P18052|PTPRA_MOUSE Receptor-type tyrosine-protein phosphatase alpha OS=Mus musculus OX=10090 GN=Ptpra PE=1 SV=3;tr|Q91V35|Q91V35_MOUSE Receptor-type tyrosine-protein phosphatase alpha OS=Mus musculus OX=10090 GN=Ptpra PE=1 SV=1	13.8115	14.0268	14.2293	13.7477	14.8425	14.4031	14377.2	16691.2	19206.4	13755.3	29379	21665.3	0.77585	-0.366149	0.363068	0.440012
Programmed cell death protein 6	Pdcd6	sp|P12815|PDCD6_MOUSE Programmed cell death protein 6 OS=Mus musculus OX=10090 GN=Pdcd6 PE=1 SV=2	10.7633	12.5215	10.3904	11.8004	11.8924	12.8901	1738.11	5879.59	1342.21	3566.76	3801.62	7591.14	0.598944	-0.739508	0.363257	0.439786
Coronin-1C;Coronin	Coro1c	sp|Q9WUM4|COR1C_MOUSE Coronin-1C OS=Mus musculus OX=10090 GN=Coro1c PE=1 SV=2;tr|E9PZJ0|E9PZJ0_MOUSE Coronin-1C (Fragment) OS=Mus musculus OX=10090 GN=Coro1c PE=1 SV=1;tr|E9PVJ1|E9PVJ1_MOUSE Coronin-1C (Fragment) OS=Mus musculus OX=10090 GN=Coro1c PE=1 SV=	14.4508	14.3127	13.9086	14.325	13.3832	13.9867	22393.6	20349.4	15378.2	20523.7	10684.3	16233.7	1.22511	0.292914	0.370113	0.431666
AP-2 complex subunit alpha-1	Ap2a1	sp|P17426|AP2A1_MOUSE AP-2 complex subunit alpha-1 OS=Mus musculus OX=10090 GN=Ap2a1 PE=1 SV=1	14.8161	14.5458	14.5667	14.3362	14.6704	14.5239	28846.3	23917.8	24266.9	20683.6	26075.4	23557.5	1.09549	0.131577	0.371225	0.430363
Phospholipid transfer protein	Pltp	sp|P55065|PLTP_MOUSE Phospholipid transfer protein OS=Mus musculus OX=10090 GN=Pltp PE=1 SV=1;tr|A2A5K2|A2A5K2_MOUSE Phospholipid transfer protein OS=Mus musculus OX=10090 GN=Pltp PE=1 SV=1;tr|A2A5K3|A2A5K3_MOUSE Phospholipid transfer protein (Fragment) OS	12.8768	12.0699	13.3549	13.4935	12.0919	14.8986	7521.48	4299.34	10476.7	11533.2	4365.41	30544	0.48011	-1.05856	0.371944	0.429522
Insulin-1;Insulin-1 B chain;Insulin-1 A chain	Ins1	sp|P01325|INS1_MOUSE Insulin-1 OS=Mus musculus OX=10090 GN=Ins1 PE=1 SV=1	16.6735	21.5044	16.8216	16.9824	14.7267	17.4602	104526	2.97488e+06	115826	129483	27113.1	180320	9.48377	3.24546	0.375339	0.425576
Ras-related protein Rab-5B	Rab5b	sp|P61021|RAB5B_MOUSE Ras-related protein Rab-5B OS=Mus musculus OX=10090 GN=Rab5b PE=1 SV=1	10.1634	9.47237	9.23577	10.4339	9.73916	9.8512	1146.8	710.342	602.898	1383.3	854.632	923.648	0.778105	-0.361964	0.375874	0.424958
60S ribosomal protein L30	Rpl30	sp|P62889|RL30_MOUSE 60S ribosomal protein L30 OS=Mus musculus OX=10090 GN=Rpl30 PE=1 SV=2;tr|A0A2I3BQF4|A0A2I3BQF4_MOUSE 60S ribosomal protein L30 OS=Mus musculus OX=10090 GN=Rpl30 PE=1 SV=1	12.5022	12.6179	13.6617	12.741	12.2915	12.5783	5801.46	6285.88	12959.3	6845.78	5013.14	6115.69	1.39344	0.478656	0.376215	0.424564
Guanine nucleotide-binding protein subunit alpha-11;Guanine nucleotide-binding protein G(q) subunit alpha	Gna11;Gnaq	sp|P21278|GNA11_MOUSE Guanine nucleotide-binding protein subunit alpha-11 OS=Mus musculus OX=10090 GN=Gna11 PE=1 SV=1;sp|P21279|GNAQ_MOUSE Guanine nucleotide-binding protein G(q) subunit alpha OS=Mus musculus OX=10090 GN=Gnaq PE=1 SV=4	12.7523	13.6368	13.5491	13.2143	13.9805	13.7678	6899.61	12737.5	11986.3	9503.87	16164	13948.3	0.798246	-0.325095	0.37686	0.42382
Glutathione S-transferase P 1;Glutathione S-transferase P 2	Gstp1;Gstp2	sp|P19157|GSTP1_MOUSE Glutathione S-transferase P 1 OS=Mus musculus OX=10090 GN=Gstp1 PE=1 SV=2;sp|P46425|GSTP2_MOUSE Glutathione S-transferase P 2 OS=Mus musculus OX=10090 GN=Gstp2 PE=1 SV=2;tr|A0A494BAS3|A0A494BAS3_MOUSE Glutathione S-transferase P 2 (Fr	11.9724	15.5223	11.9689	12.4646	11.7234	11.6952	4018.38	47062.8	4008.65	5652.21	3381.39	3315.93	4.46088	2.15733	0.377608	0.422959
Rho GTPase-activating protein 1	Arhgap1	sp|Q5FWK3|RHG01_MOUSE Rho GTPase-activating protein 1 OS=Mus musculus OX=10090 GN=Arhgap1 PE=1 SV=1;tr|A2AH25|A2AH25_MOUSE Rho GTPase-activating protein 1 OS=Mus musculus OX=10090 GN=Arhgap1 PE=1 SV=1	12.2389	11.6587	10.0113	9.98867	11.3849	10.8538	4833.66	3233.09	1032.05	1015.99	2674.22	1850.63	1.64214	0.715574	0.379466	0.420828
Methylosome protein 50	Wdr77	sp|Q99J09|MEP50_MOUSE Methylosome protein 50 OS=Mus musculus OX=10090 GN=Wdr77 PE=1 SV=1;tr|F7D5L2|F7D5L2_MOUSE Methylosome protein 50 (Fragment) OS=Mus musculus OX=10090 GN=Wdr77 PE=1 SV=1	11.4427	9.70844	9.82202	10.2547	8.67822	9.79284	2783.53	836.627	905.154	1221.72	409.642	887.031	1.7969	0.845513	0.38091	0.419177
Integrin alpha-5;Integrin alpha-5 heavy chain;Integrin alpha-5 light chain	Itga5	sp|P11688|ITA5_MOUSE Integrin alpha-5 OS=Mus musculus OX=10090 GN=Itga5 PE=1 SV=3	10.7395	10.9719	11.8922	10.7786	12.5365	11.9192	1709.67	2008.5	3801.1	1756.64	5941.04	3872.9	0.64986	-0.621799	0.381073	0.418992
N-alpha-acetyltransferase 50	Naa50	sp|Q6PGB6|NAA50_MOUSE N-alpha-acetyltransferase 50 OS=Mus musculus OX=10090 GN=Naa50 PE=1 SV=1	12.9975	12.9339	11.827	12.5229	11.898	12.3671	8177.82	7825.14	3633.14	5885.3	3816.41	5282.85	1.31042	0.390031	0.382989	0.416814
Epidermal growth factor receptor substrate 15-like 1	Eps15l1	sp|Q60902|EP15R_MOUSE Epidermal growth factor receptor substrate 15-like 1 OS=Mus musculus OX=10090 GN=Eps15l1 PE=1 SV=3;tr|A0A1D5RLS1|A0A1D5RLS1_MOUSE Epidermal growth factor receptor substrate 15-like 1 OS=Mus musculus OX=10090 GN=Eps15l1 PE=1 SV=1	10.199	11.0381	11.6139	11.3997	11.3632	11.4178	1175.45	2102.81	3134.24	2701.79	2634.29	2735.9	0.794414	-0.332037	0.384134	0.415517
ATP synthase subunit beta, mitochondrial	Atp5b	sp|P56480|ATPB_MOUSE ATP synthase subunit beta, mitochondrial OS=Mus musculus OX=10090 GN=Atp5f1b PE=1 SV=2	14.5548	13.2199	13.1686	13.3065	13.1223	13.1969	24067.5	9540.84	9207.54	10131.1	8916.74	9389.94	1.5056	0.590339	0.384406	0.41521
Ras-related protein Rab-14	Rab14	sp|Q91V41|RAB14_MOUSE Ras-related protein Rab-14 OS=Mus musculus OX=10090 GN=Rab14 PE=1 SV=3;tr|Q50HX3|Q50HX3_MOUSE RAB14 protein variant OS=Mus musculus OX=10090 GN=Rab14 PE=1 SV=1;tr|A0A2R8VHW9|A0A2R8VHW9_MOUSE Ras-related protein Rab-14 (Fragment) OS=Mu	13.8623	13.9949	13.248	13.7831	13.3347	13.2043	14892.5	16326.2	9728.49	14097	10331.1	9438.23	1.20908	0.273915	0.391668	0.407082
Apolipoprotein E	Apoe	sp|P08226|APOE_MOUSE Apolipoprotein E OS=Mus musculus OX=10090 GN=Apoe PE=1 SV=2;tr|A0A1B0GX15|A0A1B0GX15_MOUSE Apolipoprotein E (Fragment) OS=Mus musculus OX=10090 GN=Apoe PE=1 SV=1;tr|G3UWN5|G3UWN5_MOUSE Apolipoprotein E (Fragment) OS=Mus musculus OX=100	19.8882	19.4398	20.0618	20.0547	19.6473	20.6055	970387	711153	1.09447e+06	1.0891e+06	821158	1.59541e+06	0.791863	-0.336678	0.391746	0.406995
Laminin subunit alpha-1	Lama1	sp|P19137|LAMA1_MOUSE Laminin subunit alpha-1 OS=Mus musculus OX=10090 GN=Lama1 PE=1 SV=2	16.0813	16.1194	17.4109	16.087	16.2228	16.073	69335.2	71190.6	174262	69609.7	76480.3	68937.4	1.46394	0.54986	0.392842	0.405783
ELAV-like protein 1	Elavl1	sp|P70372|ELAV1_MOUSE ELAV-like protein 1 OS=Mus musculus OX=10090 GN=Elavl1 PE=1 SV=2	9.57652	10.2312	9.77138	9.65005	9.01194	9.93725	763.519	1201.98	873.934	803.442	516.255	980.416	1.23448	0.303899	0.394813	0.403609
Histone H2A.V;Histone H2A.Z;Histone H2A	H2afv;H2afz	sp|Q3THW5|H2AV_MOUSE Histone H2A.V OS=Mus musculus OX=10090 GN=H2az2 PE=1 SV=3;sp|P0C0S6|H2AZ_MOUSE Histone H2A.Z OS=Mus musculus OX=10090 GN=H2az1 PE=1 SV=2;tr|Q3UA95|Q3UA95_MOUSE Histone H2A OS=Mus musculus OX=10090 GN=H2az1 PE=2 SV=1;tr|Q8R029|Q8R029_MO	12.097	13.4971	13.2089	12.5466	12.6245	12.7733	4380.86	11562	9468.37	5982.78	6314.71	7000.78	1.31676	0.396994	0.39756	0.400598
Ras-related protein Rap-1A	Rap1a	sp|P62835|RAP1A_MOUSE Ras-related protein Rap-1A OS=Mus musculus OX=10090 GN=Rap1a PE=1 SV=1;tr|A0A0G2JE52|A0A0G2JE52_MOUSE Ras-related protein Rap-1A OS=Mus musculus OX=10090 GN=Rap1a PE=1 SV=1;tr|A0A0G2JDL9|A0A0G2JDL9_MOUSE Ras-related protein Rap-1A OS=	15.7406	17.1708	16.2234	16.6659	17.1569	16.8161	54751.1	147545	76512.1	103977	146131	115385	0.76283	-0.390567	0.400118	0.397812
Importin subunit beta-1	Kpnb1	sp|P70168|IMB1_MOUSE Importin subunit beta-1 OS=Mus musculus OX=10090 GN=Kpnb1 PE=1 SV=2	14.2999	13.7376	13.6307	13.6087	13.5973	13.8434	20169.7	13659.3	12683.8	12491.9	12393.5	14698.7	1.17504	0.232708	0.402213	0.395544
Fragile X mental retardation protein 1 homolog	Fmr1	sp|P35922|FMR1_MOUSE Synaptic functional regulator FMR1 OS=Mus musculus OX=10090 GN=Fmr1 PE=1 SV=1;tr|E9QAS9|E9QAS9_MOUSE Synaptic functional regulator FMR1 OS=Mus musculus OX=10090 GN=Fmr1 PE=1 SV=1;tr|E9QAT0|E9QAT0_MOUSE Synaptic functional regulator FMR	10.2338	8.41368	10.0667	9.35973	10.0823	11.677	1204.15	341.012	1072.45	656.991	1084.11	3274.37	0.521908	-0.938131	0.402295	0.395455
Syntaxin-2	Stx2	sp|Q00262|STX2_MOUSE Syntaxin-2 OS=Mus musculus OX=10090 GN=Stx2 PE=1 SV=1;tr|D3YY94|D3YY94_MOUSE Syntaxin-2 (Fragment) OS=Mus musculus OX=10090 GN=Stx2 PE=1 SV=1;tr|Q3TJ55|Q3TJ55_MOUSE Syntaxin-2 OS=Mus musculus OX=10090 GN=Stx2 PE=1 SV=1;tr|Q80W45|Q80W45	10.3814	10.5341	10.9699	10.2043	11.6669	11.0765	1333.87	1482.79	2005.71	1179.78	3251.52	2159.53	0.731679	-0.450717	0.403817	0.393816
Laminin subunit beta-1	Lamb1	sp|P02469|LAMB1_MOUSE Laminin subunit beta-1 OS=Mus musculus OX=10090 GN=Lamb1 PE=1 SV=3;tr|E9QN70|E9QN70_MOUSE Laminin subunit beta-1 OS=Mus musculus OX=10090 GN=Lamb1 PE=1 SV=1	16.2318	16.1433	17.6333	16.184	15.9027	16.5251	76958.9	72379.8	203307	74450.8	61261.8	94308.5	1.5331	0.616453	0.405113	0.392424
Rab GDP dissociation inhibitor alpha	Gdi1	sp|P50396|GDIA_MOUSE Rab GDP dissociation inhibitor alpha OS=Mus musculus OX=10090 GN=Gdi1 PE=1 SV=3;tr|B7FAU8|B7FAU8_MOUSE Rab GDP dissociation inhibitor (Fragment) OS=Mus musculus OX=10090 GN=Gdi1 PE=1 SV=1	11.2672	12.2079	12.2122	12.41	12.332	11.9108	2464.71	4730.9	4745.03	5442.3	5155.87	3850.42	0.826422	-0.275049	0.406645	0.390784
1-phosphatidylinositol 4,5-bisphosphate phosphodiesterase gamma-1;Phosphoinositide phospholipase C	Plcg1	sp|Q62077|PLCG1_MOUSE 1-phosphatidylinositol 4,5-bisphosphate phosphodiesterase gamma-1 OS=Mus musculus OX=10090 GN=Plcg1 PE=1 SV=2;tr|A2A4A6|A2A4A6_MOUSE 1-phosphatidylinositol 4,5-bisphosphate phosphodiesterase gamma OS=Mus musculus OX=10090 GN=Plcg1 PE=	11.0314	11.32	9.81469	9.72849	8.9922	11.111	2093.06	2556.58	900.567	848.335	509.239	2211.79	1.55496	0.636875	0.409181	0.388084
Sodium- and chloride-dependent GABA transporter 3	Slc6a11	sp|P31650|S6A11_MOUSE Sodium- and chloride-dependent GABA transporter 3 OS=Mus musculus OX=10090 GN=Slc6a11 PE=1 SV=2	13.782	14.1287	14.3032	14.3843	14.1619	14.1512	14086.3	17912.8	20215.9	21384.8	18329.8	18194.3	0.901673	-0.149324	0.410852	0.386314
Traf2 and NCK-interacting protein kinase	Tnik	sp|P83510|TNIK_MOUSE Traf2 and NCK-interacting protein kinase OS=Mus musculus OX=10090 GN=Tnik PE=1 SV=2;tr|E0CZF8|E0CZF8_MOUSE Traf2 and NCK-interacting protein kinase OS=Mus musculus OX=10090 GN=Tnik PE=1 SV=1;tr|E0CXD6|E0CXD6_MOUSE Traf2 and NCK-interac	13.3074	13.2241	13.343	13.2241	13.9327	13.3187	10137.4	9568.65	10390.7	9568.65	15637.3	10217.1	0.849637	-0.235081	0.411706	0.385413
ADP-ribosylation factor-like protein 8A;ADP-ribosylation factor-like protein 8B	Arl8a;Arl8b	sp|Q8VEH3|ARL8A_MOUSE ADP-ribosylation factor-like protein 8A OS=Mus musculus OX=10090 GN=Arl8a PE=1 SV=1;tr|F6QKK2|F6QKK2_MOUSE ADP-ribosylation factor-like protein 8A (Fragment) OS=Mus musculus OX=10090 GN=Arl8a PE=1 SV=1;sp|Q9CQW2|ARL8B_MOUSE ADP-ribosy	12.9916	12.9462	13.4893	12.8854	13.1343	12.8779	8144.44	7892.14	11499.6	7566.45	8991.21	7527.21	1.1433	0.193203	0.412369	0.384714
Tetraspanin;Tetraspanin-9	Tspan9	tr|A0A0J9YTS4|A0A0J9YTS4_MOUSE Tetraspanin (Fragment) OS=Mus musculus OX=10090 GN=Tspan9 PE=1 SV=1;tr|D3YXN7|D3YXN7_MOUSE Tetraspanin (Fragment) OS=Mus musculus OX=10090 GN=Tspan9 PE=1 SV=2;sp|Q8BJU2|TSN9_MOUSE Tetraspanin-9 OS=Mus musculus OX=10090 GN=Tsp	10.3621	12.8392	10.1833	10.5651	9.98107	10.727	1316.14	7327.98	1162.73	1515	1010.65	1694.92	2.32359	1.21635	0.413055	0.383993
MIT domain-containing protein 1	Mitd1	sp|Q8VDV8|MITD1_MOUSE MIT domain-containing protein 1 OS=Mus musculus OX=10090 GN=Mitd1 PE=1 SV=1	10.7378	11.5782	11.0726	11.2246	11.5463	11.4097	1707.65	3057.63	2153.7	2392.99	2990.77	2720.58	0.853738	-0.228135	0.413206	0.383833
Small ubiquitin-related modifier 2;Small ubiquitin-related modifier 3;Small ubiquitin-related modifier	Sumo2;Sumo3	sp|P61957|SUMO2_MOUSE Small ubiquitin-related modifier 2 OS=Mus musculus OX=10090 GN=Sumo2 PE=1 SV=1;sp|Q9Z172|SUMO3_MOUSE Small ubiquitin-related modifier 3 OS=Mus musculus OX=10090 GN=Sumo3 PE=1 SV=1;tr|G3UZX6|G3UZX6_MOUSE Small ubiquitin-related modifie	12.6291	12.9273	13.1338	13.4336	13.0394	12.8367	6334.87	7789.42	8988.1	11064.1	8418.81	7315.29	0.86246	-0.21347	0.414625	0.382344
Engulfment and cell motility protein 1	Elmo1	sp|Q8BPU7|ELMO1_MOUSE Engulfment and cell motility protein 1 OS=Mus musculus OX=10090 GN=Elmo1 PE=1 SV=2	9.73598	9.7007	10.2604	10.0822	10.0825	10.0939	852.751	832.15	1226.56	1084.04	1084.26	1092.87	0.892766	-0.163646	0.414659	0.382309
Glucose-6-phosphate 1-dehydrogenase X;Glucose-6-phosphate 1-dehydrogenase	G6pdx	sp|Q00612|G6PD1_MOUSE Glucose-6-phosphate 1-dehydrogenase X OS=Mus musculus OX=10090 GN=G6pdx PE=1 SV=3;tr|A3KG36|A3KG36_MOUSE Glucose-6-phosphate 1-dehydrogenase (Fragment) OS=Mus musculus OX=10090 GN=G6pdx PE=1 SV=1	12.8436	12.7824	11.9013	12.2502	12.1546	12.4519	7350.36	7045.08	3825.15	4871.67	4559.31	5602.67	1.21199	0.277374	0.414983	0.381969
V-type proton ATPase 116 kDa subunit a isoform 1;V-type proton ATPase subunit a	Atp6v0a1	sp|Q9Z1G4|VPP1_MOUSE V-type proton ATPase 116 kDa subunit a1 OS=Mus musculus OX=10090 GN=Atp6v0a1 PE=1 SV=3;tr|A2A599|A2A599_MOUSE V-type proton ATPase subunit a (Fragment) OS=Mus musculus OX=10090 GN=Atp6v0a1 PE=1 SV=1;tr|K3W4T3|K3W4T3_MOUSE V-type proton	10.0758	9.83416	10.6737	9.98863	11.2985	10.4716	1079.24	912.803	1633.44	1015.96	2518.76	1419.93	0.731734	-0.450609	0.424824	0.371791
Phosphoglucomutase-1	Pgm1;Pgm2	sp|Q9D0F9|PGM1_MOUSE Phosphoglucomutase-1 OS=Mus musculus OX=10090 GN=Pgm1 PE=1 SV=4;tr|A2CEK3|A2CEK3_MOUSE Phosphoglucomutase-1 OS=Mus musculus OX=10090 GN=Pgm1 PE=1 SV=1	13.673	13.4687	13.7329	13.7178	13.5214	13.0776	13061.2	11336.6	13614.9	13473.2	11758.4	8644.7	1.12211	0.166209	0.429657	0.366879
Heterogeneous nuclear ribonucleoprotein L-like	Hnrnpll	sp|Q921F4|HNRLL_MOUSE Heterogeneous nuclear ribonucleoprotein L-like OS=Mus musculus OX=10090 GN=Hnrnpll PE=1 SV=3;tr|V9GXB6|V9GXB6_MOUSE Heterogeneous nuclear ribonucleoprotein L-like OS=Mus musculus OX=10090 GN=Hnrnpll PE=1 SV=1	14.125	13.4568	13.1456	12.9345	12.7141	13.812	17866.9	11243.5	9061.91	7828.39	6719.32	14382.2	1.31947	0.399961	0.436507	0.360009
Pleiotrophin	Ptn	tr|Q3UZI5|Q3UZI5_MOUSE Pleiotrophin OS=Mus musculus OX=10090 GN=Ptn PE=1 SV=1;sp|P63089|PTN_MOUSE Pleiotrophin OS=Mus musculus OX=10090 GN=Ptn PE=1 SV=1	8.95405	9.92014	11.1465	10.0524	10.6332	11.6801	495.95	968.857	2266.89	1061.88	1588.23	3281.41	0.629131	-0.668567	0.438748	0.357784
UPF0568 protein C14orf166 homolog	RTRAF	sp|Q9CQE8|RTRAF_MOUSE RNA transcription, translation and transport factor protein OS=Mus musculus OX=10090 GN=RTRAF PE=1 SV=1	11.092	11.1273	11.3123	11.2829	11.0623	10.6597	2182.85	2236.92	2542.97	2491.67	2138.38	1617.67	1.11445	0.156328	0.438823	0.357711
Sulfhydryl oxidase 1	Qsox1	sp|Q8BND5|QSOX1_MOUSE Sulfhydryl oxidase 1 OS=Mus musculus OX=10090 GN=Qsox1 PE=1 SV=1	11.0219	10.656	10.6323	10.3793	11.0915	11.6652	2079.33	1613.52	1587.23	1331.93	2182.1	3247.69	0.780879	-0.356829	0.440118	0.356431
ATP-dependent RNA helicase DDX3X;ATP-dependent RNA helicase DDX3Y;Putative ATP-dependent RNA helicase Pl10	Ddx3x;Ddx3y;D1Pas1	sp|Q62167|DDX3X_MOUSE ATP-dependent RNA helicase DDX3X OS=Mus musculus OX=10090 GN=Ddx3x PE=1 SV=3;sp|Q62095|DDX3Y_MOUSE ATP-dependent RNA helicase DDX3Y OS=Mus musculus OX=10090 GN=Ddx3y PE=1 SV=2;sp|P16381|DDX3L_MOUSE Putative ATP-dependent RNA helicase	14.6304	13.9698	13.3582	14.2217	14.1559	14.7992	25362.3	16044.6	10500.7	19105.5	18253.7	28510.4	0.788037	-0.343665	0.440534	0.356021
Low molecular weight phosphotyrosine protein phosphatase	Acp1	sp|Q9D358|PPAC_MOUSE Low molecular weight phosphotyrosine protein phosphatase OS=Mus musculus OX=10090 GN=Acp1 PE=1 SV=3;tr|A0A1W2P7X3|A0A1W2P7X3_MOUSE Low molecular weight phosphotyrosine protein phosphatase OS=Mus musculus OX=10090 GN=Acp1 PE=1 SV=1;tr|Q	12.5712	11.8051	12.3008	12.1332	12.9026	12.4439	6085.67	3578.4	5045.56	4492.18	7657.19	5571.69	0.830065	-0.268704	0.442782	0.35381
F-actin-capping protein subunit alpha-2	Capza2	sp|P47754|CAZA2_MOUSE F-actin-capping protein subunit alpha-2 OS=Mus musculus OX=10090 GN=Capza2 PE=1 SV=3;tr|A0A0N4SVM0|A0A0N4SVM0_MOUSE F-actin-capping protein subunit alpha (Fragment) OS=Mus musculus OX=10090 GN=Capza2 PE=1 SV=1;tr|D6RCW7|D6RCW7_MOUSE F	14.1287	13.7817	13.6915	13.9109	13.9612	14.1435	17912.8	14083.3	13229.8	15402.7	15949.2	18097.5	0.914587	-0.128807	0.443711	0.3529
NHP2-like protein 1;NHP2-like protein 1, N-terminally processed	Nhp2l1	sp|Q9D0T1|NH2L1_MOUSE NHP2-like protein 1 OS=Mus musculus OX=10090 GN=Snu13 PE=1 SV=4	12.2656	11.1599	14.3302	11.7102	12.6865	11.5921	4923.95	2288.05	20597.8	3350.59	6592	3087.24	2.13432	1.09377	0.445295	0.351352
N(G),N(G)-dimethylarginine dimethylaminohydrolase 1	Ddah1	sp|Q9CWS0|DDAH1_MOUSE N(G),N(G)-dimethylarginine dimethylaminohydrolase 1 OS=Mus musculus OX=10090 GN=Ddah1 PE=1 SV=3;tr|D3YU15|D3YU15_MOUSE N(G),N(G)-dimethylarginine dimethylaminohydrolase 1 OS=Mus musculus OX=10090 GN=Ddah1 PE=1 SV=1	13.8668	14.7361	14.2163	14.369	13.8422	13.8559	14939	27290.3	19034.1	21159.2	14686.5	14826.6	1.20901	0.273829	0.449209	0.347552
Laminin subunit beta-2	Lamb2	sp|Q61292|LAMB2_MOUSE Laminin subunit beta-2 OS=Mus musculus OX=10090 GN=Lamb2 PE=1 SV=2	12.3902	12.8204	13.7344	13.3286	13.1775	13.7586	5368.12	7233.11	13629.1	10287.5	9264.52	13859.6	0.785066	-0.349115	0.450148	0.346645
Protein disulfide-isomerase A6	Pdia6	sp|Q922R8|PDIA6_MOUSE Protein disulfide-isomerase A6 OS=Mus musculus OX=10090 GN=Pdia6 PE=1 SV=3;tr|Q3TML0|Q3TML0_MOUSE Protein disulfide-isomerase A6 OS=Mus musculus OX=10090 GN=Pdia6 PE=1 SV=1	12.3452	11.428	12.3131	11.0711	12.0503	11.9833	5203.26	2755.31	5088.77	2151.46	4241.33	4048.86	1.24955	0.321406	0.450463	0.346341
Sorting nexin-3	Snx3	tr|D3Z789|D3Z789_MOUSE Sorting nexin-3 OS=Mus musculus OX=10090 GN=Snx3 PE=1 SV=1;tr|D3Z6Z0|D3Z6Z0_MOUSE Sorting nexin-3 OS=Mus musculus OX=10090 GN=Snx3 PE=1 SV=1;tr|Q78ZM0|Q78ZM0_MOUSE Sorting nexin-3 OS=Mus musculus OX=10090 GN=Snx3 PE=1 SV=1;sp|O70492|	12.6774	12.0291	12.5826	12.5927	12.1446	11.7584	6550.55	4179.46	6133.95	6177.04	4527.82	3464.42	1.19018	0.251176	0.450644	0.346166
U2 small nuclear ribonucleoprotein B	Snrpb2	sp|Q9CQI7|RU2B_MOUSE U2 small nuclear ribonucleoprotein B OS=Mus musculus OX=10090 GN=Snrpb2 PE=1 SV=1	12.0948	11.2358	10.644	10.8374	11.218	11.0225	4374.19	2411.64	1600.16	1829.71	2382.07	2080.19	1.33281	0.414469	0.452117	0.344749
NF-kappa-B essential modulator	Ikbkg	sp|O88522|NEMO_MOUSE NF-kappa-B essential modulator OS=Mus musculus OX=10090 GN=Ikbkg PE=1 SV=2;tr|A3KG44|A3KG44_MOUSE NF-kappa-B essential modulator (Fragment) OS=Mus musculus OX=10090 GN=Ikbkg PE=1 SV=1;tr|A3KG40|A3KG40_MOUSE NF-kappa-B essential modulat	10.4824	9.9936	9.33166	10.8661	10.5319	9.53944	1430.6	1019.47	644.332	1866.47	1480.53	744.145	0.756363	-0.40285	0.452798	0.344096
Thiosulfate sulfurtransferase	Tst	sp|P52196|THTR_MOUSE Thiosulfate sulfurtransferase OS=Mus musculus OX=10090 GN=Tst PE=1 SV=3	10.4511	19.8563	15.0681	16.6871	15.3106	15.9913	1399.89	949165	34351.8	105516	40639.6	65142	4.66128	2.22073	0.453822	0.343114
Junction plakoglobin	Jup	sp|Q02257|PLAK_MOUSE Junction plakoglobin OS=Mus musculus OX=10090 GN=Jup PE=1 SV=3	12.2957	11.5625	13.2007	11.5644	12.3275	12.0987	5027.76	3024.54	9414.7	3028.53	5139.81	4386.03	1.39131	0.476443	0.455858	0.341171
Tubulin beta-2B chain	Tubb2b	sp|Q9CWF2|TBB2B_MOUSE Tubulin beta-2B chain OS=Mus musculus OX=10090 GN=Tubb2b PE=1 SV=1	11.8141	14.8577	12.1684	12.8226	12.1977	12.2185	3600.8	29690.2	4603.13	7244.15	4697.57	4765.79	2.26809	1.18148	0.456464	0.340593
DNA-directed RNA polymerase II subunit GRINL1A	Polr2m	tr|A0A3B2WBC6|A0A3B2WBC6_MOUSE DNA-directed RNA polymerase II subunit GRINL1A OS=Mus musculus OX=10090 GN=Polr2m PE=4 SV=1	10.2322	9.98344	10.2977	9.44938	11.4571	10.5416	1202.82	1012.31	1258.68	699.112	2811.45	1490.52	0.694612	-0.525721	0.458124	0.339017
Muscarinic acetylcholine receptor M3	Chrm3	sp|Q9ERZ3|ACM3_MOUSE Muscarinic acetylcholine receptor M3 OS=Mus musculus OX=10090 GN=Chrm3 PE=1 SV=1	9.3956	9.67659	11.107	11.1155	10.9505	9.97671	673.531	818.359	2205.67	2218.7	1978.92	1007.6	0.710355	-0.493388	0.458257	0.33889
Eukaryotic peptide chain release factor subunit 1	Etf1	sp|Q8BWY3|ERF1_MOUSE Eukaryotic peptide chain release factor subunit 1 OS=Mus musculus OX=10090 GN=Etf1 PE=1 SV=4	10.9657	11.3826	11.2601	9.41753	11.1066	11.3875	1999.88	2669.96	2452.61	683.847	2205.06	2679.04	1.27919	0.355228	0.459224	0.337975
Ran-specific GTPase-activating protein	Ranbp1	sp|P34022|RANG_MOUSE Ran-specific GTPase-activating protein OS=Mus musculus OX=10090 GN=Ranbp1 PE=1 SV=2	11.3832	10.6491	11.5355	11.875	11.6032	10.9635	2671.07	1605.83	2968.46	3756.05	3111.08	1996.84	0.817394	-0.290896	0.459324	0.337881
Elongation factor 1-beta	Eef1b;Eef1b2	sp|O70251|EF1B_MOUSE Elongation factor 1-beta OS=Mus musculus OX=10090 GN=Eef1b PE=1 SV=5;tr|A0A087WS46|A0A087WS46_MOUSE Eukaryotic translation elongation factor 1 beta 2 OS=Mus musculus OX=10090 GN=Eef1b2 PE=1 SV=1	11.5123	10.7541	10.7852	11.148	10.199	10.7694	2921.11	1727.06	1764.69	2269.25	1175.45	1745.47	1.23558	0.305185	0.463513	0.333938
Ankyrin-2	Ank2	sp|Q8C8R3|ANK2_MOUSE Ankyrin-2 OS=Mus musculus OX=10090 GN=Ank2 PE=1 SV=2;tr|S4R2R5|S4R2R5_MOUSE Ankyrin-2 OS=Mus musculus OX=10090 GN=Ank2 PE=1 SV=3;tr|S4R2F3|S4R2F3_MOUSE Ankyrin-2 OS=Mus musculus OX=10090 GN=Ank2 PE=1 SV=3;tr|S4R1J9|S4R1J9_MOUSE Ankyrin	13.0406	13.0811	12.3367	12.5203	12.7511	12.7011	8425.81	8665.7	5172.69	5874.7	6893.88	6659.05	1.14601	0.196616	0.463571	0.333884
Glyoxalase domain-containing protein 4	Glod4	sp|Q9CPV4|GLOD4_MOUSE Glyoxalase domain-containing protein 4 OS=Mus musculus OX=10090 GN=Glod4 PE=1 SV=1;tr|F6ZTG3|F6ZTG3_MOUSE Glyoxalase domain-containing protein 4 (Fragment) OS=Mus musculus OX=10090 GN=Glod4 PE=1 SV=1;tr|E9Q197|E9Q197_MOUSE Glyoxalase	10.2273	10.1476	11.0033	10.6449	9.24702	10.2015	1198.74	1134.31	2052.69	1601.16	607.618	1177.49	1.29515	0.373124	0.464943	0.332601
Leucine--tRNA ligase, cytoplasmic	Lars	sp|Q8BMJ2|SYLC_MOUSE Leucine--tRNA ligase, cytoplasmic OS=Mus musculus OX=10090 GN=Lars1 PE=1 SV=2	14.5326	14.3592	13.7338	13.5521	13.2794	14.536	23700	21016	13623.4	12011.3	9942.55	23755.9	1.2763	0.351969	0.467675	0.330055
L-lactate dehydrogenase B chain;L-lactate dehydrogenase	Ldhb	sp|P16125|LDHB_MOUSE L-lactate dehydrogenase B chain OS=Mus musculus OX=10090 GN=Ldhb PE=1 SV=2;tr|D3Z7F0|D3Z7F0_MOUSE L-lactate dehydrogenase (Fragment) OS=Mus musculus OX=10090 GN=Ldhb PE=1 SV=1;tr|A0A0N4SVV8|A0A0N4SVV8_MOUSE L-lactate dehydrogenase (Fra	14.8488	14.9209	15.158	15.0715	14.8895	14.4469	29507.6	31019.8	36560.5	34432.9	30351.9	22333.2	1.11444	0.156321	0.46817	0.329597
Eukaryotic translation initiation factor 3 subunit E	Eif3e	sp|P60229|EIF3E_MOUSE Eukaryotic translation initiation factor 3 subunit E OS=Mus musculus OX=10090 GN=Eif3e PE=1 SV=1	13.7215	13.4263	13.3542	13.2302	13.646	13.1269	13507.8	11008.3	10471.6	9609.2	12819	8945.21	1.1152	0.157302	0.471959	0.326096
MOB kinase activator 1A;MOB kinase activator 1B	Mob1a;Mob1b	sp|Q921Y0|MOB1A_MOUSE MOB kinase activator 1A OS=Mus musculus OX=10090 GN=Mob1a PE=2 SV=3;sp|Q8BPB0|MOB1B_MOUSE MOB kinase activator 1B OS=Mus musculus OX=10090 GN=Mob1b PE=1 SV=3;tr|Q3UDM0|Q3UDM0_MOUSE MOB kinase activator 1B OS=Mus musculus OX=10090 GN=M	10.7581	9.72008	11.2554	10.0927	11.7774	11.2321	1731.85	843.404	2444.63	1091.96	3510.35	2405.46	0.716331	-0.481302	0.4736	0.324588
Copine-2	Cpne2	sp|P59108|CPNE2_MOUSE Copine-2 OS=Mus musculus OX=10090 GN=Cpne2 PE=1 SV=1;tr|A0A0R4J1D0|A0A0R4J1D0_MOUSE Copine-2 OS=Mus musculus OX=10090 GN=Cpne2 PE=1 SV=1	11.8007	12.2286	13.1028	12.363	12.9171	13.0617	3567.51	4799.27	8797.03	5267.86	7734.54	8549.95	0.796378	-0.328476	0.475883	0.3225
Histone-binding protein RBBP7;Histone-binding protein RBBP4	Rbbp7;Rbbp4	sp|Q60973|RBBP7_MOUSE Histone-binding protein RBBP7 OS=Mus musculus OX=10090 GN=Rbbp7 PE=1 SV=1;sp|Q60972|RBBP4_MOUSE Histone-binding protein RBBP4 OS=Mus musculus OX=10090 GN=Rbbp4 PE=1 SV=5;tr|F6ZLC6|F6ZLC6_MOUSE Histone-binding protein RBBP7 (Fragment)	10.9055	13.4736	10.6529	11.8758	11.0583	10.3044	1918.15	11375.2	1610.06	3758.13	2132.46	1264.54	2.08289	1.05859	0.475973	0.322418
Chloride intracellular channel protein 4	Clic4	sp|Q9QYB1|CLIC4_MOUSE Chloride intracellular channel protein 4 OS=Mus musculus OX=10090 GN=Clic4 PE=1 SV=3	13.1709	13.7572	13.71	13.8128	13.6068	13.7003	9222.23	13846.2	13400.5	14390.2	12475.4	13310.7	0.907721	-0.139679	0.47614	0.322265
Hsp90 co-chaperone Cdc37;Hsp90 co-chaperone Cdc37, N-terminally processed	Cdc37	sp|Q61081|CDC37_MOUSE Hsp90 co-chaperone Cdc37 OS=Mus musculus OX=10090 GN=Cdc37 PE=1 SV=1	10.5776	11.2868	11.2144	10.757	9.99889	11.2557	1528.18	2498.42	2376.13	1730.53	1023.21	2445.14	1.23156	0.300487	0.476537	0.321904
Protein lin-7 homolog C;Protein lin-7 homolog A	Lin7c;Lin7a	sp|O88952|LIN7C_MOUSE Protein lin-7 homolog C OS=Mus musculus OX=10090 GN=Lin7c PE=1 SV=2;sp|Q8JZS0|LIN7A_MOUSE Protein lin-7 homolog A OS=Mus musculus OX=10090 GN=Lin7a PE=1 SV=2	13.5926	13.2136	13.3133	12.9639	13.5527	13.0376	12353.2	9499.26	10178.9	7989.56	12016.3	8408.31	1.12731	0.17288	0.47766	0.320881
Disheveled-associated activator of morphogenesis 1	Daam1	sp|Q8BPM0|DAAM1_MOUSE Disheveled-associated activator of morphogenesis 1 OS=Mus musculus OX=10090 GN=Daam1 PE=1 SV=4	9.45743	9.57249	10.4643	9.52969	11.0918	10.0892	703.024	761.389	1412.76	739.133	2182.55	1089.31	0.717321	-0.479309	0.484073	0.31509
Hemopexin	Hpx	sp|Q91X72|HEMO_MOUSE Hemopexin OS=Mus musculus OX=10090 GN=Hpx PE=1 SV=2	14.9852	17.0631	14.7803	14.905	14.5749	15.8171	32433.6	136932	28139.3	30679.8	24405.2	57732.7	1.75066	0.807896	0.488125	0.311469
Coatomer subunit gamma-1	Copg1	sp|Q9QZE5|COPG1_MOUSE Coatomer subunit gamma-1 OS=Mus musculus OX=10090 GN=Copg1 PE=1 SV=1	12.4574	11.3502	11.9656	11.5212	11.9055	11.7253	5624.07	2610.66	3999.49	2939.18	3836.3	3385.84	1.204	0.267834	0.489277	0.310445
Adenylyl cyclase-associated protein 1;Adenylyl cyclase-associated protein	Cap1	sp|P40124|CAP1_MOUSE Adenylyl cyclase-associated protein 1 OS=Mus musculus OX=10090 GN=Cap1 PE=1 SV=4;tr|B1ARS0|B1ARS0_MOUSE Adenylyl cyclase-associated protein 1 (Fragment) OS=Mus musculus OX=10090 GN=Cap1 PE=1 SV=1	13.1084	13.2859	13.1765	13.3828	13.0229	12.4779	8831.24	9987.45	9258.1	10681.3	8323.07	5704.56	1.1363	0.184345	0.48939	0.310345
Peptidyl-prolyl cis-trans isomerase B	Ppib	sp|P24369|PPIB_MOUSE Peptidyl-prolyl cis-trans isomerase B OS=Mus musculus OX=10090 GN=Ppib PE=1 SV=2	10.997	11.1175	12.1672	11.7736	11.6936	11.9565	2043.75	2221.78	4599.3	3501.12	3312.26	3974.34	0.821752	-0.283225	0.491326	0.308631
Neuronal pentraxin-1	Nptx1	sp|Q62443|NPTX1_MOUSE Neuronal pentraxin-1 OS=Mus musculus OX=10090 GN=Nptx1 PE=1 SV=1	10.7991	10.5691	10.3142	10.4924	10.2015	11.9987	1781.78	1519.2	1273.16	1440.55	1177.49	4092.31	0.681655	-0.552886	0.49194	0.308088
N(G),N(G)-dimethylarginine dimethylaminohydrolase 2	Ddah2	sp|Q99LD8|DDAH2_MOUSE N(G),N(G)-dimethylarginine dimethylaminohydrolase 2 OS=Mus musculus OX=10090 GN=Ddah2 PE=1 SV=1	13.3495	12.5728	12.7166	12.1267	12.9942	12.7134	10437.6	6092.42	6730.98	4471.99	8159.13	6716.06	1.20229	0.265788	0.492251	0.307813
Histone H1.4;Histone H1.1	Hist1h1e;Hist1h1a	sp|P43274|H14_MOUSE Histone H1.4 OS=Mus musculus OX=10090 GN=H1-4 PE=1 SV=2;sp|P43275|H11_MOUSE Histone H1.1 OS=Mus musculus OX=10090 GN=H1-1 PE=1 SV=2	13.224	13.6673	14.5615	13.6426	13.7087	13.3598	9567.99	13009.7	24179.6	12788.9	13388.4	10512.4	1.2744	0.349816	0.496939	0.303697
AP-1 complex subunit gamma-1	Ap1g1	sp|P22892|AP1G1_MOUSE AP-1 complex subunit gamma-1 OS=Mus musculus OX=10090 GN=Ap1g1 PE=1 SV=3;tr|Q8CBB7|Q8CBB7_MOUSE AP-1 complex subunit gamma OS=Mus musculus OX=10090 GN=Ap1g1 PE=1 SV=1	10.7153	11.1062	11.38	11.2852	10.6668	10.5281	1681.23	2204.45	2665.15	2495.65	1625.65	1476.64	1.17022	0.226781	0.497646	0.30308
60S ribosomal protein L19;Ribosomal protein L19	Rpl19	sp|P84099|RL19_MOUSE 60S ribosomal protein L19 OS=Mus musculus OX=10090 GN=Rpl19 PE=1 SV=1;tr|A2A547|A2A547_MOUSE Ribosomal protein L19 OS=Mus musculus OX=10090 GN=Rpl19 PE=1 SV=1	11.1657	10.258	11.5411	11.0687	11.5928	11.3209	2297.26	1224.52	2980.01	2147.88	3088.73	2558.18	0.834119	-0.261674	0.497973	0.302794
Leucine-rich repeat-containing protein 16A	Lrrc16a	sp|Q6EDY6|CARL1_MOUSE F-actin-uncapping protein LRRC16A OS=Mus musculus OX=10090 GN=Carmil1 PE=1 SV=2;tr|F7AI27|F7AI27_MOUSE F-actin-uncapping protein LRRC16A (Fragment) OS=Mus musculus OX=10090 GN=Carmil1 PE=1 SV=1;tr|D3Z030|D3Z030_MOUSE F-actin-uncapping	13.1041	12.9981	12.98	12.8725	13.2888	13.1833	8804.96	8181.22	8079.22	7499.09	10007.5	9301.84	0.93498	-0.0969921	0.497995	0.302775
Eukaryotic translation initiation factor 3 subunit B	Eif3b	sp|Q8JZQ9|EIF3B_MOUSE Eukaryotic translation initiation factor 3 subunit B OS=Mus musculus OX=10090 GN=Eif3b PE=1 SV=1	12.7683	12.2318	12.3687	12.6387	12.465	12.6982	6976.56	4809.93	5288.71	6377.17	5653.78	6645.67	0.914255	-0.129331	0.500058	0.30098
Serpin H1	Serpinh1	sp|P19324|SERPH_MOUSE Serpin H1 OS=Mus musculus OX=10090 GN=Serpinh1 PE=1 SV=3	13.6637	13.7083	13.8958	13.8008	13.5818	14.3889	12977.3	13384.7	15242.4	14271	12261.1	21453.1	0.867025	-0.205855	0.500594	0.300514
EMILIN-1	Emilin1	sp|Q99K41|EMIL1_MOUSE EMILIN-1 OS=Mus musculus OX=10090 GN=Emilin1 PE=1 SV=1	10.1378	10.5566	10.7818	10.7464	10.5103	10.689	1126.63	1506.1	1760.54	1717.86	1458.53	1650.86	0.910097	-0.135908	0.509331	0.293
Glycine--tRNA ligase	Gars	sp|Q9CZD3|GARS_MOUSE Glycine--tRNA ligase OS=Mus musculus OX=10090 GN=Gars1 PE=1 SV=1	10.9812	11.8192	11.1272	11.5265	11.2036	9.7055	2021.49	3613.55	2236.77	2950	2358.41	834.923	1.28136	0.357671	0.512983	0.289897
UTP--glucose-1-phosphate uridylyltransferase	Ugp2	sp|Q91ZJ5|UGPA_MOUSE UTP--glucose-1-phosphate uridylyltransferase OS=Mus musculus OX=10090 GN=Ugp2 PE=1 SV=3	13.9242	13.7268	14.4874	14.0036	13.8534	13.8295	15545.4	13557.5	22969	16424.9	14800.9	14557.8	1.13735	0.185673	0.512997	0.289885
Endoplasmin	Hsp90b1	sp|P08113|ENPL_MOUSE Endoplasmin OS=Mus musculus OX=10090 GN=Hsp90b1 PE=1 SV=2;tr|F7C312|F7C312_MOUSE Endoplasmin (Fragment) OS=Mus musculus OX=10090 GN=Hsp90b1 PE=1 SV=1	11.3069	11.0906	11.9331	11.2541	11.0014	11.4957	2533.47	2180.74	3910.4	2442.43	2049.99	2887.69	1.16863	0.224817	0.514351	0.288741
Isochorismatase domain-containing protein 1	Isoc1	sp|Q91V64|ISOC1_MOUSE Isochorismatase domain-containing protein 1 OS=Mus musculus OX=10090 GN=Isoc1 PE=1 SV=1;tr|A0A494B952|A0A494B952_MOUSE Isochorismatase domain-containing protein 1 OS=Mus musculus OX=10090 GN=Isoc1 PE=1 SV=1	11.2723	10.0523	11.5497	11.7013	11.0916	11.2644	2473.43	1061.8	2997.82	3329.99	2182.25	2459.93	0.819484	-0.287212	0.51571	0.287594
DnaJ homolog subfamily C member 7	Dnajc7	sp|Q9QYI3|DNJC7_MOUSE DnaJ homolog subfamily C member 7 OS=Mus musculus OX=10090 GN=Dnajc7 PE=1 SV=2;tr|F7BTP8|F7BTP8_MOUSE DnaJ homolog subfamily C member 7 (Fragment) OS=Mus musculus OX=10090 GN=Dnajc7 PE=1 SV=1	10.5541	10.1145	9.55409	8.83452	10.8419	11.2077	1503.49	1108.58	751.74	456.515	1835.43	2365.12	0.722303	-0.469324	0.518021	0.285653
FACT complex subunit SSRP1	Ssrp1	sp|Q08943|SSRP1_MOUSE FACT complex subunit SSRP1 OS=Mus musculus OX=10090 GN=Ssrp1 PE=1 SV=2;tr|A2AW05|A2AW05_MOUSE FACT complex subunit SSRP1 (Fragment) OS=Mus musculus OX=10090 GN=Ssrp1 PE=1 SV=1	9.68538	9.85741	9.36193	10.5881	9.28028	9.72669	823.36	927.633	657.994	1539.34	621.788	847.277	0.800751	-0.320575	0.524641	0.280138
Ataxin-2-like protein	Atxn2l	sp|Q7TQH0|ATX2L_MOUSE Ataxin-2-like protein OS=Mus musculus OX=10090 GN=Atxn2l PE=1 SV=1;tr|E9Q5Q0|E9Q5Q0_MOUSE Ataxin-2-like protein (Fragment) OS=Mus musculus OX=10090 GN=Atxn2l PE=1 SV=2;tr|Q3TGG2|Q3TGG2_MOUSE Ataxin-2-like protein OS=Mus musculus OX=10	14.2859	13.5023	13.6395	13.9574	13.3488	13.4904	19974.9	11603.7	12761.4	15907.3	10432.5	11508.4	1.17152	0.228385	0.524677	0.280108
Integrin alpha-4	Itga4	sp|Q00651|ITA4_MOUSE Integrin alpha-4 OS=Mus musculus OX=10090 GN=Itga4 PE=1 SV=1;tr|Q792F9|Q792F9_MOUSE Alpha-4 integrin OS=Mus musculus OX=10090 GN=Itga4 PE=1 SV=1	9.619	10.6679	8.75002	10.2758	9.95492	10.4412	786.335	1626.89	430.545	1239.72	992.498	1390.32	0.785021	-0.349197	0.524943	0.279888
Phosphoglycerate mutase 1;Phosphoglycerate mutase 2	Pgam1;Pgam2	sp|Q9DBJ1|PGAM1_MOUSE Phosphoglycerate mutase 1 OS=Mus musculus OX=10090 GN=Pgam1 PE=1 SV=3;sp|O70250|PGAM2_MOUSE Phosphoglycerate mutase 2 OS=Mus musculus OX=10090 GN=Pgam2 PE=1 SV=3	13.677	15.1523	13.8439	13.8144	14.0153	14.1006	13097.5	36416.4	14703.8	14406.2	16558.7	17567.2	1.3232	0.40403	0.528118	0.277269
Lipase, member I	Lipi	tr|F6YQT7|F6YQT7_MOUSE Lipase, member I OS=Mus musculus OX=10090 GN=Lipi PE=3 SV=1	12.9915	13.1384	15.0158	14.0392	14.1675	15.1515	8143.88	9016.8	33128.8	16835.3	18401	36396.2	0.702049	-0.510357	0.528318	0.277104
Myosin-10	Myh10	sp|Q61879|MYH10_MOUSE Myosin-10 OS=Mus musculus OX=10090 GN=Myh10 PE=1 SV=2;tr|Q5SV64|Q5SV64_MOUSE Myosin-10 OS=Mus musculus OX=10090 GN=Myh10 PE=1 SV=1;tr|Q3UH59|Q3UH59_MOUSE Myosin-10 OS=Mus musculus OX=10090 GN=Myh10 PE=1 SV=1	13.3853	13.0744	12.6496	11.8143	12.9536	13.2441	10699.8	8625.55	6425.53	3601.29	7932.72	9702.23	1.21259	0.278095	0.530191	0.275568
Endophilin-A3	Sh3gl3	sp|Q62421|SH3G3_MOUSE Endophilin-A3 OS=Mus musculus OX=10090 GN=Sh3gl3 PE=1 SV=1;tr|J3QQ44|J3QQ44_MOUSE Endophilin-A3 OS=Mus musculus OX=10090 GN=Sh3gl3 PE=1 SV=1;tr|A0A0R4J0B8|A0A0R4J0B8_MOUSE Endophilin-A3 OS=Mus musculus OX=10090 GN=Sh3gl3 PE=1 SV=1;tr|	10.2456	11.4011	11.0531	10.7944	10.7107	12.2817	1214.04	2704.41	2124.78	1775.98	1675.88	4979.21	0.716782	-0.480393	0.533098	0.273193
Catenin beta-1	Ctnnb1	sp|Q02248|CTNB1_MOUSE Catenin beta-1 OS=Mus musculus OX=10090 GN=Ctnnb1 PE=1 SV=1;tr|E9Q6A9|E9Q6A9_MOUSE Catenin beta-1 OS=Mus musculus OX=10090 GN=Ctnnb1 PE=1 SV=1	14.2571	14.2365	14.5765	14.3499	14.7172	14.3472	19580.1	19302.5	24432.3	20881	26935.1	20841.9	0.922178	-0.116883	0.534193	0.272302
EGF-like repeat and discoidin I-like domain-containing protein 3	Edil3	tr|Q8C4U8|Q8C4U8_MOUSE EGF-like repeat and discoidin I-like domain-containing protein 3 OS=Mus musculus OX=10090 GN=Edil3 PE=1 SV=1;sp|O35474|EDIL3_MOUSE EGF-like repeat and discoidin I-like domain-containing protein 3 OS=Mus musculus OX=10090 GN=Edil3 PE=	14.2622	14.0663	13.7717	13.7205	14.4097	14.4312	19649.4	17154.5	13986	13498.4	21764.7	22091.4	0.885545	-0.175363	0.538164	0.269086
Myristoylated alanine-rich C-kinase substrate	Marcks	sp|P26645|MARCS_MOUSE Myristoylated alanine-rich C-kinase substrate OS=Mus musculus OX=10090 GN=Marcks PE=1 SV=2	16.9729	17.3596	17.8602	17.8388	17.9376	17.1179	128633	168175	237934	234430	251047	142233	0.851891	-0.23126	0.541954	0.266038
Heterogeneous nuclear ribonucleoprotein H2;Heterogeneous nuclear ribonucleoprotein H;Heterogeneous nuclear ribonucleoprotein H, N-terminally processed	Hnrnph2;Hnrnph1	sp|P70333|HNRH2_MOUSE Heterogeneous nuclear ribonucleoprotein H2 OS=Mus musculus OX=10090 GN=Hnrnph2 PE=1 SV=1;sp|O35737|HNRH1_MOUSE Heterogeneous nuclear ribonucleoprotein H OS=Mus musculus OX=10090 GN=Hnrnph1 PE=1 SV=3;tr|Q8C2Q7|Q8C2Q7_MOUSE Heterogeneou	10.9646	9.60976	10.3812	10.2719	10.3999	9.50324	1998.36	781.315	1333.68	1236.37	1351.08	725.705	1.24152	0.312107	0.54225	0.2658
Thrombospondin type-1 domain-containing protein 7A	Thsd7a	sp|Q69ZU6|THS7A_MOUSE Thrombospondin type-1 domain-containing protein 7A OS=Mus musculus OX=10090 GN=Thsd7a PE=1 SV=2;tr|E9PWD2|E9PWD2_MOUSE Thrombospondin type-1 domain-containing protein 7A OS=Mus musculus OX=10090 GN=Thsd7a PE=1 SV=1;tr|E9QNR5|E9QNR5_MO	11.8236	12.7297	11.8577	12.5306	12.3321	12.3398	3624.58	6792.37	3711.28	5916.79	5156.23	5183.82	0.869064	-0.202466	0.543925	0.264461
Protein tyrosine phosphatase type IVA 2	Ptp4a2	sp|O70274|TP4A2_MOUSE Protein tyrosine phosphatase type IVA 2 OS=Mus musculus OX=10090 GN=Ptp4a2 PE=1 SV=1	10.2299	12.7631	8.62842	9.54566	10.9617	10.6871	1200.9	6951.46	395.743	747.36	1994.35	1648.68	1.947	0.961255	0.544869	0.263708
Protein FAM171A2	Fam171a2	sp|A2A699|F1712_MOUSE Protein FAM171A2 OS=Mus musculus OX=10090 GN=Fam171a2 PE=1 SV=1	11.7717	11.4663	11.6838	10.8874	12.3984	12.1036	3496.51	2829.44	3289.84	1894.24	5398.71	4400.95	0.822291	-0.28228	0.54943	0.260087
Lysosome-associated membrane glycoprotein 1	Lamp1	sp|P11438|LAMP1_MOUSE Lysosome-associated membrane glycoprotein 1 OS=Mus musculus OX=10090 GN=Lamp1 PE=1 SV=2	14.0935	15.2741	14.4929	14.8079	15.0628	14.8955	17481	39624.4	23056.7	28682.8	34225.9	30478.4	0.858385	-0.220304	0.554747	0.255905
Glutaminyl-tRNA synthetase (Fragment)	Qars	tr|A0A140LIZ4|A0A140LIZ4_MOUSE Glutaminyl-tRNA synthetase (Fragment) OS=Mus musculus OX=10090 GN=Qars PE=1 SV=1;tr|D3Z158|D3Z158_MOUSE Glutaminyl-tRNA synthetase OS=Mus musculus OX=10090 GN=Qars PE=1 SV=2;sp|Q8BML9|SYQ_MOUSE Glutamine--tRNA ligase OS=Mus m	10.7939	11.6943	9.94623	10.3829	11.7273	11.6303	1775.37	3313.87	986.537	1335.26	3390.54	3170.07	0.769487	-0.378031	0.555466	0.255343
Obg-like ATPase 1	Ola1	sp|Q9CZ30|OLA1_MOUSE Obg-like ATPase 1 OS=Mus musculus OX=10090 GN=Ola1 PE=1 SV=1;tr|B1AYJ9|B1AYJ9_MOUSE Obg-like ATPase 1 OS=Mus musculus OX=10090 GN=Ola1 PE=1 SV=1	12.5459	11.731	11.9274	12.046	11.5655	12.0711	5979.88	3399.25	3894.98	4228.7	3030.84	4302.92	1.14803	0.199166	0.557063	0.254095
26S proteasome non-ATPase regulatory subunit 7	Psmd7	sp|P26516|PSMD7_MOUSE 26S proteasome non-ATPase regulatory subunit 7 OS=Mus musculus OX=10090 GN=Psmd7 PE=1 SV=2	12.5384	11.237	11.7045	12.0653	11.2457	11.387	5948.87	2413.65	3337.38	4285.65	2428.25	2678.11	1.24573	0.31699	0.55886	0.252697
Syntaxin-binding protein 3	Stxbp3	sp|Q60770|STXB3_MOUSE Syntaxin-binding protein 3 OS=Mus musculus OX=10090 GN=Stxbp3 PE=1 SV=1	11.5359	11.2434	11.9344	11.7325	11.4077	12.1203	2969.29	2424.38	3913.92	3402.78	2716.81	4452.19	0.880418	-0.18374	0.561446	0.250692
6-phosphogluconolactonase	Pgls	sp|Q9CQ60|6PGL_MOUSE 6-phosphogluconolactonase OS=Mus musculus OX=10090 GN=Pgls PE=1 SV=1;tr|F6X8L5|F6X8L5_MOUSE 6-phosphogluconolactonase (Fragment) OS=Mus musculus OX=10090 GN=Pgls PE=1 SV=1;tr|Q8CBG6|Q8CBG6_MOUSE 6-phosphogluconolactonase OS=Mus musculu	12.3452	11.5707	11.9619	11.3554	12.1954	11.674	5203.26	3041.78	3989.24	2620.09	4690.09	3267.56	1.15661	0.209898	0.562126	0.250167
60S ribosomal protein L7	Rpl7	sp|P14148|RL7_MOUSE 60S ribosomal protein L7 OS=Mus musculus OX=10090 GN=Rpl7 PE=1 SV=2;tr|F6XI62|F6XI62_MOUSE 60S ribosomal protein L7 (Fragment) OS=Mus musculus OX=10090 GN=Rpl7 PE=1 SV=1	13.0912	12.2051	14.5992	13.3724	13.0193	12.8939	8726.58	4721.73	24819.7	10604.6	8302.33	7611.16	1.44309	0.529165	0.562352	0.249992
Protein scribble homolog	Scrib	sp|Q80U72|SCRIB_MOUSE Protein scribble homolog OS=Mus musculus OX=10090 GN=Scrib PE=1 SV=2	9.01859	9.62822	9.64007	10.2391	9.47435	9.19502	518.64	791.376	797.903	1208.58	711.318	586.107	0.841147	-0.24957	0.563888	0.248807
Phytanoyl-CoA hydroxylase-interacting protein-like	Phyhipl	sp|Q8BGT8|PHIPL_MOUSE Phytanoyl-CoA hydroxylase-interacting protein-like OS=Mus musculus OX=10090 GN=Phyhipl PE=1 SV=1;tr|F6U6Z2|F6U6Z2_MOUSE Phytanoyl-CoA hydroxylase-interacting protein-like (Fragment) OS=Mus musculus OX=10090 GN=Phyhipl PE=1 SV=1;tr|F7D	11.0932	11.6731	10.2779	11.2035	11.04	11.8283	2184.67	3265.53	1241.53	2358.25	2105.58	3636.41	0.826115	-0.275586	0.566544	0.246766
Polyadenylate-binding protein-interacting protein 2B	Paip2b	sp|Q91W45|PAI2B_MOUSE Polyadenylate-binding protein-interacting protein 2B OS=Mus musculus OX=10090 GN=Paip2b PE=1 SV=2	10.4825	11.216	11.3047	10.6664	10.9078	12.2205	1430.69	2378.77	2529.61	1625.2	1921.21	4772.4	0.762017	-0.392105	0.567548	0.245997
Sepiapterin reductase	Spr	sp|Q64105|SPRE_MOUSE Sepiapterin reductase OS=Mus musculus OX=10090 GN=Spr PE=1 SV=1;tr|G3UZ79|G3UZ79_MOUSE Sepiapterin reductase OS=Mus musculus OX=10090 GN=Spr PE=1 SV=1;tr|G3UXX3|G3UXX3_MOUSE Sepiapterin reductase OS=Mus musculus OX=10090 GN=Spr PE=1 SV	11.4156	9.77672	9.7617	11.4148	10.4893	10.7155	2731.73	877.174	868.09	2730.22	1437.45	1681.46	0.765412	-0.385692	0.567837	0.245776
Tax1-binding protein 1 homolog	Tax1bp1	sp|Q3UKC1|TAXB1_MOUSE Tax1-binding protein 1 homolog OS=Mus musculus OX=10090 GN=Tax1bp1 PE=1 SV=2	13.5536	12.7766	13.7317	13.4248	13.0794	13.1461	12023.8	7016.81	13603.6	10996.8	8655.49	9065.05	1.13674	0.184901	0.569075	0.244831
Guanine nucleotide-binding protein G(I)/G(S)/G(T) subunit beta-1	Gnb1	sp|P62874|GBB1_MOUSE Guanine nucleotide-binding protein G(I)/G(S)/G(T) subunit beta-1 OS=Mus musculus OX=10090 GN=Gnb1 PE=1 SV=3;tr|H3BKR2|H3BKR2_MOUSE Guanine nucleotide-binding protein G(I)/G(S)/G(T) subunit beta-1 (Fragment) OS=Mus musculus OX=10090 GN=	16.2798	16.2898	16.8992	16.4599	16.9039	16.6195	79562.4	80115.8	122227	90141.3	122626	100686	0.899355	-0.153038	0.571079	0.243304
Laminin subunit gamma-1	Lamc1	tr|F8VQJ3|F8VQJ3_MOUSE Laminin subunit gamma-1 OS=Mus musculus OX=10090 GN=Lamc1 PE=1 SV=1;sp|P02468|LAMC1_MOUSE Laminin subunit gamma-1 OS=Mus musculus OX=10090 GN=Lamc1 PE=1 SV=2	16.1557	16.0987	17.5815	16.2882	15.9985	16.7854	73004.6	70176.5	196137	80027	65467.9	112956	1.31289	0.392747	0.571856	0.242713
Tsukushin	Tsku	sp|Q8CBR6|TSK_MOUSE Tsukushin OS=Mus musculus OX=10090 GN=Tsku PE=2 SV=2	11.5219	11.2785	9.94687	10.9386	10.7216	10.6947	2940.61	2484.09	986.975	1962.67	1688.59	1657.39	1.20778	0.272357	0.571881	0.242695
Bromodomain adjacent to zinc finger domain protein 2A	Baz2a	sp|Q91YE5|BAZ2A_MOUSE Bromodomain adjacent to zinc finger domain protein 2A OS=Mus musculus OX=10090 GN=Baz2a PE=1 SV=2;tr|F8VPM0|F8VPM0_MOUSE Bromodomain adjacent to zinc finger domain protein 2A OS=Mus musculus OX=10090 GN=Baz2a PE=1 SV=1;tr|E9Q374|E9Q37	12.3312	13.2295	12.7687	12.2887	13.1867	13.5161	5153.01	9604.53	6978.49	5003.42	9323.78	11715.2	0.834639	-0.260777	0.574446	0.240751
Peptidyl-prolyl cis-trans isomerase FKBP4;Peptidyl-prolyl cis-trans isomerase FKBP4, N-terminally processed	Fkbp4	sp|P30416|FKBP4_MOUSE Peptidyl-prolyl cis-trans isomerase FKBP4 OS=Mus musculus OX=10090 GN=Fkbp4 PE=1 SV=5	11.818	12.1896	11.9016	12.3902	11.0309	11.4106	3610.54	4671.27	3825.94	5368.12	2092.34	2722.28	1.18905	0.249807	0.575698	0.239806
Spondin-1	Spon1	sp|Q8VCC9|SPON1_MOUSE Spondin-1 OS=Mus musculus OX=10090 GN=Spon1 PE=1 SV=1	12.7856	11.9919	13.9614	12.5866	12.8973	12.721	7060.72	4073.07	15951.5	6150.98	7629.12	6751.54	1.3192	0.399659	0.576026	0.239558
Protein NDRG2	Ndrg2	sp|Q9QYG0|NDRG2_MOUSE Protein NDRG2 OS=Mus musculus OX=10090 GN=Ndrg2 PE=1 SV=1;tr|A0A2I3BS20|A0A2I3BS20_MOUSE Protein NDRG2 (Fragment) OS=Mus musculus OX=10090 GN=Ndrg2 PE=1 SV=1;tr|A0A2I3BQM5|A0A2I3BQM5_MOUSE Protein NDRG2 (Fragment) OS=Mus musculus OX=1	12.7912	12.2207	12.5627	12.6356	12.4298	12.1257	7088.18	4773.06	6049.92	6363.48	5517.5	4468.89	1.09549	0.13158	0.579906	0.236642
Tubulin-specific chaperone C	Tbcc	sp|Q8VCN9|TBCC_MOUSE Tubulin-specific chaperone C OS=Mus musculus OX=10090 GN=Tbcc PE=1 SV=1;tr|A0A0R4J0M1|A0A0R4J0M1_MOUSE Tubulin-specific chaperone C OS=Mus musculus OX=10090 GN=Tbcc PE=1 SV=1	11.1625	10.3975	10.9723	10.862	10.9661	10.0474	2292.17	1348.84	2009.05	1861.18	2000.44	1058.2	1.14843	0.199662	0.580556	0.236156
Unconventional myosin-Ib	Myo1b	sp|P46735|MYO1B_MOUSE Unconventional myosin-Ib OS=Mus musculus OX=10090 GN=Myo1b PE=1 SV=3;tr|E9QNH6|E9QNH6_MOUSE Unconventional myosin-Ib OS=Mus musculus OX=10090 GN=Myo1b PE=1 SV=1;tr|E9Q580|E9Q580_MOUSE Unconventional myosin-Ib OS=Mus musculus OX=10090	13.6432	13.9263	14.1222	13.6924	14.068	13.5418	12794.2	15568	17832.2	13238	17174.7	11925.8	1.09107	0.125747	0.581661	0.23533
Cysteine sulfinic acid decarboxylase	Csad	sp|Q9DBE0|CSAD_MOUSE Cysteine sulfinic acid decarboxylase OS=Mus musculus OX=10090 GN=Csad PE=1 SV=1;tr|A0A2R8VHX0|A0A2R8VHX0_MOUSE Cysteine sulfinic acid decarboxylase OS=Mus musculus OX=10090 GN=Csad PE=1 SV=1;tr|A0A2R8VHD3|A0A2R8VHD3_MOUSE Cysteine sulf	13.3042	12.1496	12.6899	12.7469	12.6534	12.2351	10114.9	4543.54	6607.55	6873.84	6442.48	4820.94	1.1725	0.229594	0.581666	0.235327
60S ribosomal protein L29	Rpl29;Gm3550	sp|P47915|RL29_MOUSE 60S ribosomal protein L29 OS=Mus musculus OX=10090 GN=Rpl29 PE=1 SV=2;tr|A0A1L1SUN1|A0A1L1SUN1_MOUSE 60S ribosomal protein L29 (Fragment) OS=Mus musculus OX=10090 GN=Rpl29 PE=1 SV=1;tr|A0A1L1SS27|A0A1L1SS27_MOUSE 60S ribosomal protein	10.4955	10.0338	11.7565	10.0342	10.9095	10.6168	1443.64	1048.27	3459.86	1048.56	1923.48	1570.27	1.3103	0.389895	0.583494	0.233964
Unconventional myosin-XVIIIa	Myo18a	sp|Q9JMH9|MY18A_MOUSE Unconventional myosin-XVIIIa OS=Mus musculus OX=10090 GN=Myo18a PE=1 SV=2;tr|K3W4L0|K3W4L0_MOUSE Unconventional myosin-XVIIIa OS=Mus musculus OX=10090 GN=Myo18a PE=1 SV=1;tr|B2RRE2|B2RRE2_MOUSE Myo18a protein OS=Mus musculus OX=10090	11.5383	12.2717	10.6792	11.3776	11.5651	11.0391	2974.23	4944.81	1639.68	2660.72	3030	2104.26	1.22627	0.294273	0.58709	0.231295
SH3 domain-binding glutamic acid-rich-like protein	Sh3bgrl	sp|Q9JJU8|SH3L1_MOUSE SH3 domain-binding glutamic acid-rich-like protein OS=Mus musculus OX=10090 GN=Sh3bgrl PE=1 SV=1	11.6368	12.3404	12.366	12.2356	11.9498	11.7724	3184.39	5185.98	5278.82	4822.62	3955.93	3498.21	1.11179	0.152886	0.591707	0.227893
PDZ and LIM domain protein 5	Pdlim5	sp|Q8CI51|PDLI5_MOUSE PDZ and LIM domain protein 5 OS=Mus musculus OX=10090 GN=Pdlim5 PE=1 SV=4;tr|D9J2Z9|D9J2Z9_MOUSE ENH isoform 1b OS=Mus musculus OX=10090 GN=Pdlim5 PE=1 SV=1;tr|D9J300|D9J300_MOUSE ENH isoform 1c OS=Mus musculus OX=10090 GN=Pdlim5 PE=1	14.3689	14.1621	14.1761	14.1718	14.2282	14.518	21157.8	18332.3	18511.1	18456	19191.8	23461.4	0.94914	-0.0753066	0.597331	0.223785
OTU domain-containing protein 4	Otud4	sp|B2RRE7|OTUD4_MOUSE OTU domain-containing protein 4 OS=Mus musculus OX=10090 GN=Otud4 PE=1 SV=1;tr|A0A0R4J260|A0A0R4J260_MOUSE OTU domain-containing protein 4 OS=Mus musculus OX=10090 GN=Otud4 PE=1 SV=1	9.15273	9.19158	10.3343	10.6417	9.12595	9.88324	569.176	584.711	1291.02	1597.61	558.708	944.391	0.788501	-0.342816	0.600983	0.221138
Basement membrane-specific heparan sulfate proteoglycan core protein	Hspg2	tr|E9PZ16|E9PZ16_MOUSE Basement membrane-specific heparan sulfate proteoglycan core protein OS=Mus musculus OX=10090 GN=Hspg2 PE=1 SV=1;tr|B1B0C7|B1B0C7_MOUSE Basement membrane-specific heparan sulfate proteoglycan core protein OS=Mus musculus OX=10090 GN=	16.751	16.8754	17.4788	16.5959	16.7426	17.2532	110294	120227	182660	99052.1	109654	156218	1.13224	0.179178	0.604535	0.218578
Laminin subunit alpha-5	Lama5	sp|Q61001|LAMA5_MOUSE Laminin subunit alpha-5 OS=Mus musculus OX=10090 GN=Lama5 PE=1 SV=4	14.4732	14.1912	15.1525	13.543	14.376	14.9453	22744	18705.8	36421.4	11935.7	21262.2	31548.9	1.20271	0.266284	0.604744	0.218429
Catenin alpha-1	Ctnna1	sp|P26231|CTNA1_MOUSE Catenin alpha-1 OS=Mus musculus OX=10090 GN=Ctnna1 PE=1 SV=1	14.9738	14.7529	15.6243	15.203	15.5159	15.2307	32178.3	27609.9	50510.7	37718.9	46854.5	38450.1	0.896567	-0.157516	0.605925	0.217581
Ephrin type-A receptor 4	Epha4	sp|Q03137|EPHA4_MOUSE Ephrin type-A receptor 4 OS=Mus musculus OX=10090 GN=Epha4 PE=1 SV=2	11.5912	11.6007	12.2308	11.5335	12.053	12.3514	3085.31	3105.69	4806.6	2964.35	4249.27	5225.67	0.884102	-0.177715	0.609472	0.215046
Limbic system-associated membrane protein	Lsamp	sp|Q8BLK3|LSAMP_MOUSE Limbic system-associated membrane protein OS=Mus musculus OX=10090 GN=Lsamp PE=1 SV=1;tr|Q3TYE5|Q3TYE5_MOUSE Limbic system-associated membrane protein OS=Mus musculus OX=10090 GN=Lsamp PE=1 SV=1;tr|A0A087WP80|A0A087WP80_MOUSE Limbic s	14.1654	14.0479	13.863	14.2928	13.7751	14.2674	18374.3	16937.1	14899.7	20070.7	14019	19720.4	0.933118	-0.0998691	0.615351	0.210877
Protein FAM50A	Fam50a	sp|Q9WV03|FA50A_MOUSE Protein FAM50A OS=Mus musculus OX=10090 GN=Fam50a PE=1 SV=1	10.7632	11.2151	11.7512	12.1723	11.5219	10.6703	1737.99	2377.29	3447.18	4615.59	2940.61	1629.6	0.823276	-0.280552	0.616351	0.210172
Superoxide dismutase [Cu-Zn]	Sod1	sp|P08228|SODC_MOUSE Superoxide dismutase [Cu-Zn] OS=Mus musculus OX=10090 GN=Sod1 PE=1 SV=2	14.8493	15.5205	15.6865	15.6398	15.6129	15.3111	29517.8	47004.1	52736	51056.3	50113.1	40653.7	0.911403	-0.133839	0.616821	0.209841
Regulator of nonsense transcripts 1	Upf1	sp|Q9EPU0|RENT1_MOUSE Regulator of nonsense transcripts 1 OS=Mus musculus OX=10090 GN=Upf1 PE=1 SV=2	14.1501	13.3674	13.0211	13.6992	12.8931	13.3739	18180.4	10567.9	8312.69	13300.6	7606.94	10615.6	1.17568	0.233493	0.616837	0.20983
NADP-dependent malic enzyme;Malic enzyme	Me1	sp|P06801|MAOX_MOUSE NADP-dependent malic enzyme OS=Mus musculus OX=10090 GN=Me1 PE=1 SV=2;tr|Q3TQP6|Q3TQP6_MOUSE Malic enzyme OS=Mus musculus OX=10090 GN=Me1 PE=1 SV=1	10.005	12.7327	11.2892	11.1451	11.5806	11.073	1027.56	6806.51	2502.58	2264.69	3062.72	2154.29	1.38159	0.466328	0.616842	0.209826
V-type proton ATPase catalytic subunit A	Atp6v1a	sp|P50516|VATA_MOUSE V-type proton ATPase catalytic subunit A OS=Mus musculus OX=10090 GN=Atp6v1a PE=1 SV=2;tr|D3Z1B9|D3Z1B9_MOUSE V-type proton ATPase catalytic subunit A (Fragment) OS=Mus musculus OX=10090 GN=Atp6v1a PE=1 SV=1;tr|D3YZ23|D3YZ23_MOUSE V-ty	12.4434	12.2557	12.4903	12.6985	12.3506	12.3511	5569.76	4890.28	5753.8	6647.06	5222.77	5224.58	0.948488	-0.0762989	0.617056	0.209676
Heterogeneous nuclear ribonucleoprotein Q	Syncrip	sp|Q7TMK9|HNRPQ_MOUSE Heterogeneous nuclear ribonucleoprotein Q OS=Mus musculus OX=10090 GN=Syncrip PE=1 SV=2;tr|G3UZ48|G3UZ48_MOUSE Heterogeneous nuclear ribonucleoprotein Q OS=Mus musculus OX=10090 GN=Syncrip PE=1 SV=1;tr|G3UZI2|G3UZI2_MOUSE Heterogeneou	13.2103	13.2677	13.456	13.5455	12.8803	13.1004	9477.56	9862.24	11237.2	11956.4	7539.74	8782.4	1.08128	0.112739	0.617984	0.209023
Ras-related protein Rab-9A	Rab9a;Rab9	sp|Q9R0M6|RAB9A_MOUSE Ras-related protein Rab-9A OS=Mus musculus OX=10090 GN=Rab9a PE=1 SV=1;tr|A2AFP5|A2AFP5_MOUSE RAB9, member RAS oncogene family (Fragment) OS=Mus musculus OX=10090 GN=Rab9 PE=1 SV=1;tr|A2AFP4|A2AFP4_MOUSE RAB9, member RAS oncogene fami	11.5365	8.90027	11.2476	11.6653	10.7488	11.1803	2970.52	477.802	2431.45	3247.92	1720.72	2320.63	0.806633	-0.310015	0.620898	0.20698
WD40 repeat-containing protein SMU1;WD40 repeat-containing protein SMU1, N-terminally processed	Smu1	sp|Q3UKJ7|SMU1_MOUSE WD40 repeat-containing protein SMU1 OS=Mus musculus OX=10090 GN=Smu1 PE=2 SV=2	10.6165	11.5598	10.5769	12.0184	10.9666	10.5418	1569.95	3018.88	1527.44	4148.57	2001.13	1490.73	0.800514	-0.321002	0.621312	0.20669
Ras-related protein Rab-2A;Ras-related protein Rab-2B	Rab2a;Rab2b	sp|P53994|RAB2A_MOUSE Ras-related protein Rab-2A OS=Mus musculus OX=10090 GN=Rab2a PE=1 SV=1;sp|P59279|RAB2B_MOUSE Ras-related protein Rab-2B OS=Mus musculus OX=10090 GN=Rab2b PE=1 SV=1;tr|Q3TEG7|Q3TEG7_MOUSE Ras-related protein Rab-2B OS=Mus musculus OX=1	13.1871	13.6055	12.671	12.4732	13.2284	13.2274	9326.37	12464.2	6521.55	5686.01	9597.21	9590.56	1.13823	0.186793	0.622962	0.205538
Serine/threonine-protein phosphatase PP1-beta catalytic subunit	Ppp1cb	sp|P62141|PP1B_MOUSE Serine/threonine-protein phosphatase PP1-beta catalytic subunit OS=Mus musculus OX=10090 GN=Ppp1cb PE=1 SV=3;tr|A0A0J9YUU8|A0A0J9YUU8_MOUSE Serine/threonine-protein phosphatase PP1-beta catalytic subunit (Fragment) OS=Mus musculus OX=1	11.0982	11.2323	11.4089	11.4307	10.2302	11.3112	2192.26	2405.8	2719.07	2760.47	1201.15	2541.03	1.12525	0.170248	0.623208	0.205367
Serine/arginine-rich splicing factor 3	Srsf3	sp|P84104|SRSF3_MOUSE Serine/arginine-rich splicing factor 3 OS=Mus musculus OX=10090 GN=Srsf3 PE=1 SV=1	11.9946	11.3122	11.8964	10.5495	11.8556	11.8961	4080.7	2542.8	3812.18	1498.7	3705.88	3811.39	1.15747	0.210969	0.623336	0.205278
Ribose-phosphate pyrophosphokinase 1	Prps1;Prps1l3	sp|Q9D7G0|PRPS1_MOUSE Ribose-phosphate pyrophosphokinase 1 OS=Mus musculus OX=10090 GN=Prps1 PE=1 SV=4;tr|G3UXL2|G3UXL2_MOUSE Phosphoribosyl pyrophosphate synthetase 1-like 3 OS=Mus musculus OX=10090 GN=Prps1l3 PE=3 SV=1	10.1133	10.5518	8.40244	10.9077	10.0327	9.56511	1107.66	1501.1	338.366	1921.08	1047.47	757.504	0.790949	-0.338343	0.623378	0.205249
Pancreatic trypsin	Try4;Try5	tr|Q9R0T7|Q9R0T7_MOUSE Pancreatic trypsin OS=Mus musculus OX=10090 GN=Try4 PE=1 SV=1;tr|Q9QUK9|Q9QUK9_MOUSE TESP4 OS=Mus musculus OX=10090 GN=Try5 PE=1 SV=1	14.7465	15.3652	15.5488	16.1137	15.4527	14.6087	27487.7	42207.2	47935.3	70909.9	44846.3	24983.7	0.835798	-0.258773	0.626272	0.203237
14-3-3 protein epsilon	Ywhae	sp|P62259|1433E_MOUSE 14-3-3 protein epsilon OS=Mus musculus OX=10090 GN=Ywhae PE=1 SV=1	14.4857	17.1224	14.9643	15.5851	15.1872	15.6122	22941.9	142678	31967.1	49156.7	37308.1	50088.8	1.44695	0.533019	0.627026	0.202714
Solute carrier family 15 member 2	Slc15a2	sp|Q9ES07|S15A2_MOUSE Solute carrier family 15 member 2 OS=Mus musculus OX=10090 GN=Slc15a2 PE=1 SV=1;tr|E9PYQ9|E9PYQ9_MOUSE Solute carrier family 15 member 2 OS=Mus musculus OX=10090 GN=Slc15a2 PE=1 SV=1;tr|E9QMN8|E9QMN8_MOUSE Solute carrier family 15 mem	9.83989	12.972	11.2643	12.0689	11.9739	12.7216	916.436	8034.54	2459.76	4296.36	4022.56	6754.34	0.757018	-0.401601	0.627969	0.202062
N-acetylneuraminate lyase	Npl	sp|Q9DCJ9|NPL_MOUSE N-acetylneuraminate lyase OS=Mus musculus OX=10090 GN=Npl PE=1 SV=1	11.6359	11.3754	11.7216	11.4184	11.7317	11.8158	3182.4	2656.66	3377.17	2737.04	3400.9	3605.04	0.945936	-0.0801849	0.631888	0.19936
Vacuolar protein sorting-associated protein 26A	Vps26a	sp|P40336|VP26A_MOUSE Vacuolar protein sorting-associated protein 26A OS=Mus musculus OX=10090 GN=Vps26a PE=1 SV=1;tr|A0A1W2P7Z9|A0A1W2P7Z9_MOUSE Vacuolar protein sorting-associated protein 26A (Fragment) OS=Mus musculus OX=10090 GN=Vps26a PE=1 SV=1	11.2798	11.5715	10.4055	10.9456	10.1493	11.4139	2486.33	3043.47	1356.34	1972.21	1135.65	2728.51	1.17986	0.238621	0.63237	0.199029
AP-3 complex subunit beta-1	Ap3b1	sp|Q9Z1T1|AP3B1_MOUSE AP-3 complex subunit beta-1 OS=Mus musculus OX=10090 GN=Ap3b1 PE=1 SV=2	10.9804	8.57405	10.0483	9.00815	9.96594	10.1749	2020.36	381.106	1058.86	514.901	1000.11	1155.98	1.29553	0.373538	0.635212	0.197081
DIP2 disco-interacting protein 2 homolog B (Drosophila)	Dip2b	tr|B2RQC7|B2RQC7_MOUSE DIP2 disco-interacting protein 2 homolog B (Drosophila) OS=Mus musculus OX=10090 GN=Dip2b PE=1 SV=1	11.0143	11.1499	11.6703	10.8692	12.06	11.3889	2068.4	2272.24	3259.2	1870.49	4269.94	2681.64	0.861457	-0.215149	0.635255	0.197052
Glypican-4;Secreted glypican-4	Gpc4	sp|P51655|GPC4_MOUSE Glypican-4 OS=Mus musculus OX=10090 GN=Gpc4 PE=1 SV=2	13.5181	15.1595	14.0925	14.3499	14.5717	15.0295	11731.5	36598.6	17468.9	20881	24351.1	33444.9	0.836318	-0.257877	0.63621	0.1964
Calcium-transporting ATPase	Atp2b4	sp|Q6Q477|AT2B4_MOUSE Plasma membrane calcium-transporting ATPase 4 OS=Mus musculus OX=10090 GN=Atp2b4 PE=1 SV=1;tr|E9Q828|E9Q828_MOUSE Calcium-transporting ATPase OS=Mus musculus OX=10090 GN=Atp2b4 PE=1 SV=1;tr|F7AAP4|F7AAP4_MOUSE Calcium-transporting ATP	10.3153	10.5199	9.24544	9.00944	10.467	9.74342	1274.13	1468.27	606.953	515.361	1415.41	857.16	1.20138	0.26469	0.63954	0.194132
60S ribosomal protein L3	Rpl3	sp|P27659|RL3_MOUSE 60S ribosomal protein L3 OS=Mus musculus OX=10090 GN=Rpl3 PE=1 SV=3;tr|A0A087WNS0|A0A087WNS0_MOUSE 60S ribosomal protein L3 OS=Mus musculus OX=10090 GN=Rpl3 PE=1 SV=1;tr|A0A087WQK0|A0A087WQK0_MOUSE 60S ribosomal protein L3 (Fragment) OS	10.5409	10.2606	11.861	11.4744	9.34023	10.4567	1489.8	1226.73	3719.78	2845.37	648.171	1405.34	1.31383	0.393781	0.641808	0.192595
Rho-related GTP-binding protein RhoE	Rnd3	sp|P61588|RND3_MOUSE Rho-related GTP-binding protein RhoE OS=Mus musculus OX=10090 GN=Rnd3 PE=1 SV=1;tr|E9Q8D7|E9Q8D7_MOUSE Rho-related GTP-binding protein RhoE OS=Mus musculus OX=10090 GN=Rnd3 PE=1 SV=1	11.0506	10.6937	12.0213	11.6561	10.8398	10.5266	2121.1	1656.24	4156.92	3227.27	1832.76	1475.1	1.21409	0.279881	0.644314	0.190902
Triosephosphate isomerase	Tpi1	sp|P17751|TPIS_MOUSE Triosephosphate isomerase OS=Mus musculus OX=10090 GN=Tpi1 PE=1 SV=4;tr|H7BXC3|H7BXC3_MOUSE Triosephosphate isomerase OS=Mus musculus OX=10090 GN=Tpi1 PE=1 SV=1	14.6222	15.4852	14.3924	14.8024	14.72	14.6467	25218.6	45868	21505.2	28573.7	26987.4	25650.5	1.14013	0.189198	0.644954	0.190471
Nucleosome assembly protein 1-like 1	Nap1l1	sp|P28656|NP1L1_MOUSE Nucleosome assembly protein 1-like 1 OS=Mus musculus OX=10090 GN=Nap1l1 PE=1 SV=2;tr|Q3TF41|Q3TF41_MOUSE Nucleosome assembly protein 1-like 1 OS=Mus musculus OX=10090 GN=Nap1l1 PE=1 SV=1;tr|Q8BSH9|Q8BSH9_MOUSE Nucleosome assembly prot	9.68901	10.3165	9.95317	10.3646	9.41581	9.51633	825.435	1275.19	991.295	1318.43	683.032	732.32	1.13101	0.177608	0.64854	0.188063
Small nuclear ribonucleoprotein Sm D1	Snrpd1	sp|P62315|SMD1_MOUSE Small nuclear ribonucleoprotein Sm D1 OS=Mus musculus OX=10090 GN=Snrpd1 PE=1 SV=1;tr|A0A3Q4L381|A0A3Q4L381_MOUSE Small nuclear ribonucleoprotein Sm D1 OS=Mus musculus OX=10090 GN=Snrpd1 PE=1 SV=1;tr|A0A3Q4L2W0|A0A3Q4L2W0_MOUSE Small n	13.9847	13.8889	14.221	13.8157	13.888	14.7271	16211.2	15169.6	19096.2	14419.2	15160.2	27120.6	0.890249	-0.16772	0.653279	0.184901
Ephrin type-A receptor 5;Receptor protein-tyrosine kinase;Ephrin type-A receptor 3	Epha5;Epha3	sp|Q60629|EPHA5_MOUSE Ephrin type-A receptor 5 OS=Mus musculus OX=10090 GN=Epha5 PE=1 SV=2;tr|Q6PFV6|Q6PFV6_MOUSE Epha5 protein OS=Mus musculus OX=10090 GN=Epha5 PE=1 SV=1;tr|E9PUQ4|E9PUQ4_MOUSE Ephrin type-A receptor 5 OS=Mus musculus OX=10090 GN=Epha5 PE	14.0143	13.7885	14.182	13.9844	14.2302	13.9856	16547.2	14149.9	18586.9	16207.8	19218.4	16221.3	0.954238	-0.0675787	0.653525	0.184738
Leucine-rich repeats and immunoglobulin-like domains protein 1	Lrig1	sp|P70193|LRIG1_MOUSE Leucine-rich repeats and immunoglobulin-like domains protein 1 OS=Mus musculus OX=10090 GN=Lrig1 PE=1 SV=2	12.2759	13.742	12.8803	12.2642	13.1343	12.9871	4959.23	13701.1	7539.74	4919.17	8991.21	8119.08	1.18932	0.250134	0.653818	0.184543
S-phase kinase-associated protein 1	Skp1;Skp1a	sp|Q9WTX5|SKP1_MOUSE S-phase kinase-associated protein 1 OS=Mus musculus OX=10090 GN=Skp1 PE=1 SV=3;tr|E9PUV4|E9PUV4_MOUSE S-phase kinase-associated protein 1A (Fragment) OS=Mus musculus OX=10090 GN=Skp1a PE=1 SV=1	14.272	14.3242	14.4631	14.3534	14.4232	14.3767	19783.4	20512.3	22585.4	20931.7	21969.3	21272.5	0.97986	-0.0293519	0.65476	0.183918
Receptor-type tyrosine-protein phosphatase F	Ptprf	sp|A2A8L5|PTPRF_MOUSE Receptor-type tyrosine-protein phosphatase F OS=Mus musculus OX=10090 GN=Ptprf PE=1 SV=1;tr|F6Y3V0|F6Y3V0_MOUSE Receptor-type tyrosine-protein phosphatase F (Fragment) OS=Mus musculus OX=10090 GN=Ptprf PE=1 SV=1;tr|F6S1X8|F6S1X8_MOUSE	10.6877	10.2847	11.1554	10.3305	10.9941	10.3258	1649.37	1247.39	2280.92	1287.63	2039.64	1283.44	1.12297	0.167318	0.654917	0.183814
Plastin-3	Pls3	sp|Q99K51|PLST_MOUSE Plastin-3 OS=Mus musculus OX=10090 GN=Pls3 PE=1 SV=3;tr|A0A1C7CYV0|A0A1C7CYV0_MOUSE Plastin-3 (Fragment) OS=Mus musculus OX=10090 GN=Pls3 PE=1 SV=1;tr|B1AX58|B1AX58_MOUSE Plastin-3 OS=Mus musculus OX=10090 GN=Pls3 PE=1 SV=1	11.0567	10.3293	10.8244	9.61218	11.3174	11.507	2130.09	1286.56	1813.3	782.626	2551.98	2910.4	0.837461	-0.255905	0.655099	0.183693
NSFL1 cofactor p47	Nsfl1c	sp|Q9CZ44|NSF1C_MOUSE NSFL1 cofactor p47 OS=Mus musculus OX=10090 GN=Nsfl1c PE=1 SV=1;tr|A2AT02|A2AT02_MOUSE NSFL1 cofactor p47 OS=Mus musculus OX=10090 GN=Nsfl1c PE=1 SV=1	10.6233	12.0173	10.0709	11.9996	10.4679	11.5728	1577.36	4145.41	1075.58	4094.86	1416.29	3046.21	0.794445	-0.33198	0.658277	0.181591
Nucleoside diphosphate kinase;Nucleoside diphosphate kinase B	Gm20390;Nme2;Nme1	tr|E9PZF0|E9PZF0_MOUSE Nucleoside diphosphate kinase OS=Mus musculus OX=10090 GN=Gm20390 PE=3 SV=1;sp|Q01768|NDKB_MOUSE Nucleoside diphosphate kinase B OS=Mus musculus OX=10090 GN=Nme2 PE=1 SV=1;tr|Q5NC79|Q5NC79_MOUSE Nucleoside diphosphate kinase A OS=Mus	16.419	16.6992	17.3402	16.9372	16.7876	16.3437	87621.7	106405	165928	125489	113128	83165.6	1.11863	0.161727	0.659002	0.181113
Catenin delta-1	Ctnnd1	sp|P30999|CTND1_MOUSE Catenin delta-1 OS=Mus musculus OX=10090 GN=Ctnnd1 PE=1 SV=2;tr|E9Q986|E9Q986_MOUSE Catenin delta-1 OS=Mus musculus OX=10090 GN=Ctnnd1 PE=1 SV=1;tr|E9Q8Z6|E9Q8Z6_MOUSE Catenin delta-1 OS=Mus musculus OX=10090 GN=Ctnnd1 PE=1 SV=1;tr|E9	12.586	13.4651	12.9994	12.8794	12.831	13.0764	6148.42	11308.3	8188.59	7535.04	7286.45	8637.51	1.0932	0.128556	0.664051	0.177798
Spectrin beta chain, non-erythrocytic 1	Sptbn1	sp|Q62261|SPTB2_MOUSE Spectrin beta chain, non-erythrocytic 1 OS=Mus musculus OX=10090 GN=Sptbn1 PE=1 SV=2;tr|A0A0A0MQG2|A0A0A0MQG2_MOUSE Spectrin beta chain, non-erythrocytic 1 (Fragment) OS=Mus musculus OX=10090 GN=Sptbn1 PE=1 SV=1	11.9566	12.3737	12.9342	12.1251	12.5797	12.2292	3974.62	5307.07	7826.76	4467.03	6121.63	4801.27	1.11167	0.152723	0.667447	0.175583
Galectin-8;Galectin	Lgals8	sp|Q9JL15|LEG8_MOUSE Galectin-8 OS=Mus musculus OX=10090 GN=Lgals8 PE=1 SV=1;tr|A8DIL0|A8DIL0_MOUSE Galectin OS=Mus musculus OX=10090 GN=Lgals8 PE=1 SV=1;tr|Q8C6H0|Q8C6H0_MOUSE Galectin OS=Mus musculus OX=10090 GN=Lgals8 PE=1 SV=1	10.2745	9.56313	11.4866	10.5243	11.1136	11.0386	1238.6	756.465	2869.53	1472.75	2215.78	2103.53	0.839873	-0.251757	0.67289	0.172056
ERI1 exoribonuclease 3	Eri3	sp|Q8C460|ERI3_MOUSE ERI1 exoribonuclease 3 OS=Mus musculus OX=10090 GN=Eri3 PE=1 SV=1;tr|A0A0R4J1R9|A0A0R4J1R9_MOUSE ERI1 exoribonuclease 3 (Fragment) OS=Mus musculus OX=10090 GN=Eri3 PE=1 SV=1	10.4587	11.8508	10.3542	9.56032	11.0588	12.5096	1407.29	3693.57	1308.96	754.993	2133.19	5831.29	0.735114	-0.44396	0.674825	0.170809
ATP-binding cassette sub-family A member 1	Abca1	sp|P41233|ABCA1_MOUSE Phospholipid-transporting ATPase ABCA1 OS=Mus musculus OX=10090 GN=Abca1 PE=1 SV=4	13.7632	13.9729	14.835	14.0569	14.7261	14.4622	13903.9	16079.1	29226.7	17043.1	27101.8	22571.3	0.887487	-0.172202	0.678178	0.168656
Cyclin-Y	Ccny	sp|Q8BGU5|CCNY_MOUSE Cyclin-Y OS=Mus musculus OX=10090 GN=Ccny PE=1 SV=1	9.69564	9.10853	10.5711	10.5213	7.92696	9.14282	829.237	552.002	1521.31	1469.69	243.362	565.279	1.27398	0.349341	0.678795	0.168261
14-3-3 protein eta	Ywhah	sp|P68510|1433F_MOUSE 14-3-3 protein eta OS=Mus musculus OX=10090 GN=Ywhah PE=1 SV=2	11.9512	13.1207	12.376	12.675	11.8192	12.4865	3959.77	8906.85	5315.54	6539.66	3613.55	5738.67	1.14412	0.194234	0.679205	0.167999
60S ribosomal protein L23a	Rpl23a	sp|P62751|RL23A_MOUSE 60S ribosomal protein L23a OS=Mus musculus OX=10090 GN=Rpl23a PE=1 SV=1	12.2575	12.4398	13.2108	12.6087	12.7213	12.2687	4896.38	5555.88	9480.85	6245.93	6752.94	4934.54	1.11151	0.152517	0.685576	0.163944
Actin, alpha skeletal muscle;Actin, alpha cardiac muscle 1;Actin, aortic smooth muscle;Actin, gamma-enteric smooth muscle	Acta1;Actc1;Acta2;Actg2	sp|P68134|ACTS_MOUSE Actin, alpha skeletal muscle OS=Mus musculus OX=10090 GN=Acta1 PE=1 SV=1;sp|P68033|ACTC_MOUSE Actin, alpha cardiac muscle 1 OS=Mus musculus OX=10090 GN=Actc1 PE=1 SV=1;sp|P62737|ACTA_MOUSE Actin, aortic smooth muscle OS=Mus musculus OX	13.4933	15.1061	13.7163	14.1328	13.7482	14.1725	11531.6	35268.7	13459.2	17963.7	13760.1	18464.9	1.20066	0.263823	0.687477	0.162742
Splicing factor 3A subunit 1	Sf3a1	sp|Q8K4Z5|SF3A1_MOUSE Splicing factor 3A subunit 1 OS=Mus musculus OX=10090 GN=Sf3a1 PE=1 SV=1	12.4752	12.1031	12.2537	11.8322	12.6918	12.5465	5693.89	4399.43	4883.5	3646.26	6616.26	5982.36	0.921941	-0.117253	0.688133	0.162328
Mothers against decapentaplegic homolog 1;Mothers against decapentaplegic homolog 5;Mothers against decapentaplegic homolog	Smad1;Smad5	sp|P70340|SMAD1_MOUSE Mothers against decapentaplegic homolog 1 OS=Mus musculus OX=10090 GN=Smad1 PE=1 SV=2;sp|P97454|SMAD5_MOUSE Mothers against decapentaplegic homolog 5 OS=Mus musculus OX=10090 GN=Smad5 PE=1 SV=2;tr|Q8C3Y6|Q8C3Y6_MOUSE Mothers against d	10.483	11.8554	10.018	11.5944	10.9357	11.1388	1431.19	3705.37	1036.86	3092.16	1958.73	2254.83	0.845012	-0.242957	0.695923	0.157439
Granulins;Acrogranin;Granulin-1;Granulin-2;Granulin-3;Granulin-4;Granulin-5;Granulin-6;Granulin-7	Grn	sp|P28798|GRN_MOUSE Progranulin OS=Mus musculus OX=10090 GN=Grn PE=1 SV=2;tr|Q3U9N4|Q3U9N4_MOUSE Progranulin OS=Mus musculus OX=10090 GN=Grn PE=1 SV=1;tr|H3BJE0|H3BJE0_MOUSE Progranulin (Fragment) OS=Mus musculus OX=10090 GN=Grn PE=1 SV=1	11.0279	11.708	10.3706	10.6499	11.2827	10.8541	2087.99	3345.49	1323.92	1606.72	2491.33	1851.01	1.13588	0.183806	0.697876	0.156222
26S protease regulatory subunit 10B	Psmc6	sp|P62334|PRS10_MOUSE 26S proteasome regulatory subunit 10B OS=Mus musculus OX=10090 GN=Psmc6 PE=1 SV=1	10.5057	10.3612	9.67605	11.1032	10.3346	9.43745	1453.89	1315.32	818.053	2199.87	1291.29	693.355	0.857271	-0.222177	0.698791	0.155653
Ferritin heavy chain;Ferritin heavy chain, N-terminally processed	Fth1	sp|P09528|FRIH_MOUSE Ferritin heavy chain OS=Mus musculus OX=10090 GN=Fth1 PE=1 SV=2;tr|A0A494BAP3|A0A494BAP3_MOUSE Ferritin (Fragment) OS=Mus musculus OX=10090 GN=Fth1 PE=1 SV=1;tr|A0A494B9D4|A0A494B9D4_MOUSE Ferritin (Fragment) OS=Mus musculus OX=10090 G	11.8013	12.3016	11.4485	12.2842	11.6353	12.0679	3568.99	5048.36	2794.74	4987.84	3181.08	4293.39	0.915729	-0.127007	0.6999	0.154964
Acyl-protein thioesterase 2	Lypla2	sp|Q9WTL7|LYPA2_MOUSE Acyl-protein thioesterase 2 OS=Mus musculus OX=10090 GN=Lypla2 PE=1 SV=1	14.841	14.2857	14.2095	14.4955	14.6617	14.5204	29348.5	19972.1	18944.6	23098.3	25918.6	23500.4	0.941364	-0.0871748	0.700242	0.154752
Eukaryotic translation initiation factor 4 gamma 1	Eif4g1	sp|Q6NZJ6|IF4G1_MOUSE Eukaryotic translation initiation factor 4 gamma 1 OS=Mus musculus OX=10090 GN=Eif4g1 PE=1 SV=1;tr|A0A0J9YUS5|A0A0J9YUS5_MOUSE Eukaryotic translation initiation factor 4 gamma 1 OS=Mus musculus OX=10090 GN=Eif4g1 PE=1 SV=1;tr|E9PVC6|E	12.7973	12.9515	12.9871	12.9084	12.7115	13.2938	7118.22	7921.18	8119.08	7688.04	6707.22	10042.3	0.94766	-0.0775593	0.701724	0.153834
Cold shock domain-containing protein E1	Csde1	sp|Q91W50|CSDE1_MOUSE Cold shock domain-containing protein E1 OS=Mus musculus OX=10090 GN=Csde1 PE=1 SV=1;tr|A0A0G2JF72|A0A0G2JF72_MOUSE Cold shock domain-containing protein E1 OS=Mus musculus OX=10090 GN=Csde1 PE=1 SV=1;tr|Q8JZN2|Q8JZN2_MOUSE Cold shock d	10.2517	11.0802	10.8177	10.974	10.5257	10.3072	1219.18	2165.07	1804.9	2011.42	1474.18	1267	1.09185	0.126781	0.701942	0.153699
Collagen, type IV, alpha 6	Col4a6	tr|B1AVK5|B1AVK5_MOUSE Collagen, type IV, alpha 6 OS=Mus musculus OX=10090 GN=Col4a6 PE=1 SV=1	13.3862	14.3563	15.2265	13.8115	13.8358	14.8413	10706.5	20973.8	38338.3	14377.2	14621.5	29354.6	1.19991	0.262924	0.702203	0.153538
Unconventional myosin-VI	Myo6	tr|E9PVU0|E9PVU0_MOUSE Unconventional myosin-VI OS=Mus musculus OX=10090 GN=Myo6 PE=1 SV=1;tr|E9Q3L1|E9Q3L1_MOUSE Unconventional myosin-VI OS=Mus musculus OX=10090 GN=Myo6 PE=1 SV=1;tr|E9Q175|E9Q175_MOUSE Unconventional myosin-VI OS=Mus musculus OX=10090 G	15.1643	14.7177	14.2272	14.5334	14.7535	14.6165	36720.5	26944.4	19178.5	23713.2	27621.4	25119.1	1.08358	0.115801	0.7032	0.152921
CD9 antigen	Cd9	sp|P40240|CD9_MOUSE CD9 antigen OS=Mus musculus OX=10090 GN=Cd9 PE=1 SV=2	14.8731	18.0729	15.3138	16.4358	16.8697	17.9579	30008.8	275731	40729.9	88648	119753	254605	0.748305	-0.418302	0.703528	0.152718
60S ribosomal protein L13a	Rpl13a	sp|P19253|RL13A_MOUSE 60S ribosomal protein L13a OS=Mus musculus OX=10090 GN=Rpl13a PE=1 SV=4;tr|A0A1B0GSC2|A0A1B0GSC2_MOUSE 60S ribosomal protein L13a (Fragment) OS=Mus musculus OX=10090 GN=Rpl13a PE=1 SV=1;tr|A0A1B0GQW6|A0A1B0GQW6_MOUSE 60S ribosomal pro	13.1344	12.759	13.8237	13.62	13.3892	13.2896	8991.84	6931.73	14499.3	12590.1	10728.8	10013.1	0.912725	-0.131748	0.705233	0.151667
Matrix-remodeling-associated protein 8	Mxra8	sp|Q9DBV4|MXRA8_MOUSE Matrix remodeling-associated protein 8 OS=Mus musculus OX=10090 GN=Mxra8 PE=1 SV=1	11.6237	11.666	11.4411	10.6052	12.3173	11.8881	3155.6	3249.5	2780.44	1557.7	5103.6	3790.31	0.878864	-0.186288	0.706954	0.150609
Dynamin-3	Dnm3	sp|Q8BZ98|DYN3_MOUSE Dynamin-3 OS=Mus musculus OX=10090 GN=Dnm3 PE=1 SV=1;tr|E9QLL2|E9QLL2_MOUSE Dynamin-3 OS=Mus musculus OX=10090 GN=Dnm3 PE=1 SV=1	11.4242	11.6142	11.8332	10.9466	11.7902	11.7075	2748.06	3134.89	3648.78	1973.58	3541.64	3344.33	1.07587	0.105507	0.708473	0.149677
Peptidyl-prolyl cis-trans isomerase D	Ppid	sp|Q9CR16|PPID_MOUSE Peptidyl-prolyl cis-trans isomerase D OS=Mus musculus OX=10090 GN=Ppid PE=1 SV=3	12.3938	13.04	12.5249	12.7068	12.5841	12.4755	5381.53	8422.31	5893.46	6685.41	6140.33	5695.08	1.06352	0.0888503	0.71021	0.148613
Puromycin-sensitive aminopeptidase	Npepps	sp|Q11011|PSA_MOUSE Puromycin-sensitive aminopeptidase OS=Mus musculus OX=10090 GN=Npepps PE=1 SV=2;tr|F6QYF8|F6QYF8_MOUSE Aminopeptidase (Fragment) OS=Mus musculus OX=10090 GN=Npepps PE=1 SV=1;tr|E9Q039|E9Q039_MOUSE Aminopeptidase OS=Mus musculus OX=10090	13.597	13.908	13.8403	13.8254	13.8309	13.5336	12391	15371.8	14667.1	14516.4	14571.9	11858.2	1.03623	0.05134	0.716703	0.144661
Adenylosuccinate synthetase isozyme 2	Adss	sp|P46664|PURA2_MOUSE Adenylosuccinate synthetase isozyme 2 OS=Mus musculus OX=10090 GN=Adss2 PE=1 SV=2	10.2218	9.9495	9.78429	9.30405	10.0397	10.1847	1194.18	988.776	881.789	632.118	1052.57	1163.86	1.0759	0.10554	0.718245	0.143728
Inositol monophosphatase 1	Impa1	sp|O55023|IMPA1_MOUSE Inositol monophosphatase 1 OS=Mus musculus OX=10090 GN=Impa1 PE=1 SV=1;tr|Q924B0|Q924B0_MOUSE Inositol-1-monophosphatase OS=Mus musculus OX=10090 GN=Impa1 PE=1 SV=1;tr|Q80ZJ2|Q80ZJ2_MOUSE Inositol-1-monophosphatase OS=Mus musculus OX=	11.9118	12.0637	12.3494	12.2917	12.0551	11.7325	3853.09	4280.9	5218.43	5013.84	4255.46	3402.78	1.05369	0.0754477	0.731298	0.135905
TAR DNA-binding protein 43	Tardbp	sp|Q921F2|TADBP_MOUSE TAR DNA-binding protein 43 OS=Mus musculus OX=10090 GN=Tardbp PE=1 SV=1;tr|A0A087WQX8|A0A087WQX8_MOUSE TAR DNA-binding protein 43 (Fragment) OS=Mus musculus OX=10090 GN=Tardbp PE=1 SV=1;tr|A0A087WNY6|A0A087WNY6_MOUSE TAR DNA-binding p	12.4594	12.4116	12.4202	11.1348	12.4972	12.7722	5631.88	5448.34	5480.91	2248.58	5781.39	6995.44	1.10221	0.140396	0.737562	0.132202
Alcohol dehydrogenase class-3;Alcohol dehydrogenase class 4 mu/sigma chain	Adh5;Adh7	sp|P28474|ADHX_MOUSE Alcohol dehydrogenase class-3 OS=Mus musculus OX=10090 GN=Adh5 PE=1 SV=3;sp|Q64437|ADH7_MOUSE All-trans-retinol dehydrogenase [NAD(+)] ADH7 OS=Mus musculus OX=10090 GN=Adh7 PE=2 SV=2	13.835	13.2341	13.8154	13.9434	13.8002	13.4188	14613.4	9635.21	14416.2	15753.7	14265.1	10951.2	0.943734	-0.0835474	0.739942	0.130802
Fermitin family homolog 2	Fermt2	sp|Q8CIB5|FERM2_MOUSE Fermitin family homolog 2 OS=Mus musculus OX=10090 GN=Fermt2 PE=1 SV=1;tr|A6X940|A6X940_MOUSE Fermitin family homolog 2 (Fragment) OS=Mus musculus OX=10090 GN=Fermt2 PE=1 SV=1	13.9943	13.9986	13.4788	13.9913	13.8044	13.9053	16319.4	16368.1	11416.2	16285.5	14306.7	15343.1	0.960129	-0.0587001	0.74327	0.128853
Collagen alpha-2(IV) chain;Canstatin	Col4a2	sp|P08122|CO4A2_MOUSE Collagen alpha-2(IV) chain OS=Mus musculus OX=10090 GN=Col4a2 PE=1 SV=4	12.1533	12.255	12.8489	12.4986	12.8022	12.2962	4555.2	4887.9	7377.42	5787	7142.43	5029.5	0.93661	-0.0944793	0.743932	0.128467
Prosaposin	Psap	tr|E9PZ00|E9PZ00_MOUSE Prosaposin OS=Mus musculus OX=10090 GN=Psap PE=1 SV=1;tr|Q8BFQ1|Q8BFQ1_MOUSE Prosaposin OS=Mus musculus OX=10090 GN=Psap PE=1 SV=1;tr|K3W4L3|K3W4L3_MOUSE Prosaposin OS=Mus musculus OX=10090 GN=Psap PE=1 SV=1;tr|J3QPG5|J3QPG5_MOUSE Pr	16.9986	16.2908	16.7359	16.35	16.1227	17.7228	130945	80171.4	109146	83529.6	71353.7	216319	0.862771	-0.212951	0.744915	0.127893
Glutamate--cysteine ligase catalytic subunit	Gclc	sp|P97494|GSH1_MOUSE Glutamate--cysteine ligase catalytic subunit OS=Mus musculus OX=10090 GN=Gclc PE=1 SV=4	11.625	11.1989	11.4967	11.2142	11.7416	11.5501	3158.45	2350.74	2889.69	2375.8	3424.32	2998.66	0.954551	-0.0671055	0.747316	0.126496
Basement membrane-specific heparan sulfate proteoglycan core protein;Endorepellin;LG3 peptide	Hspg2	sp|Q05793|PGBM_MOUSE Basement membrane-specific heparan sulfate proteoglycan core protein OS=Mus musculus OX=10090 GN=Hspg2 PE=1 SV=1	12.3937	13.386	13.7581	12.8891	12.5689	13.6641	5381.15	10705	13854.8	7585.88	6075.97	12980.9	1.1238	0.16838	0.751539	0.124048
Dynein light chain 1, cytoplasmic	Dynll1	sp|P63168|DYL1_MOUSE Dynein light chain 1, cytoplasmic OS=Mus musculus OX=10090 GN=Dynll1 PE=1 SV=1	13.995	14.7437	13.4071	14.1837	14.1801	14.4604	16327.3	27434.4	10862.7	18608.8	18562.5	22543.1	0.914762	-0.128532	0.753812	0.122737
Calponin-3	Cnn3	sp|Q9DAW9|CNN3_MOUSE Calponin-3 OS=Mus musculus OX=10090 GN=Cnn3 PE=1 SV=1;tr|A0A0G2JDV8|A0A0G2JDV8_MOUSE Calponin OS=Mus musculus OX=10090 GN=Cnn3 PE=1 SV=1;tr|A0A0G2JFI6|A0A0G2JFI6_MOUSE Calponin-3 (Fragment) OS=Mus musculus OX=10090 GN=Cnn3 PE=1 SV=4	11.5736	12.704	12.2309	12.0948	12.3717	12.5509	3047.9	6672.45	4806.93	4374.19	5299.72	6000.64	0.926807	-0.109659	0.755686	0.121658
Coxsackievirus and adenovirus receptor homolog	Cxadr	sp|P97792|CXAR_MOUSE Coxsackievirus and adenovirus receptor homolog OS=Mus musculus OX=10090 GN=Cxadr PE=1 SV=1	11.3206	13.009	12.2292	12.757	12.5858	12.0779	2557.64	8243.26	4801.27	6922.13	6147.57	4323.25	0.897041	-0.156755	0.75989	0.119249
Annexin A5	Anxa5	sp|P48036|ANXA5_MOUSE Annexin A5 OS=Mus musculus OX=10090 GN=Anxa5 PE=1 SV=1	14.6254	15.3225	16.1464	15.5842	16.0207	15.2488	25274.6	40976.2	72535.5	49126	66483.1	38935.5	0.898034	-0.155158	0.759952	0.119214
Vacuolar protein sorting-associated protein 29	Vps29	sp|Q9QZ88|VPS29_MOUSE Vacuolar protein sorting-associated protein 29 OS=Mus musculus OX=10090 GN=Vps29 PE=1 SV=1;tr|D3YW98|D3YW98_MOUSE Vacuolar protein sorting-associated protein 29 OS=Mus musculus OX=10090 GN=Vps29 PE=1 SV=1;tr|D3YYD5|D3YYD5_MOUSE Vacuol	13.0453	13.3847	10.9111	12.2173	12.3506	13.022	8453.31	10695.4	1925.61	4761.83	5222.77	8317.88	1.15144	0.203445	0.762644	0.117678
Microtubule-associated protein 4;Microtubule-associated protein	Map4	sp|P27546|MAP4_MOUSE Microtubule-associated protein 4 OS=Mus musculus OX=10090 GN=Map4 PE=1 SV=3;tr|A0A0G2JFK3|A0A0G2JFK3_MOUSE Microtubule-associated protein (Fragment) OS=Mus musculus OX=10090 GN=Map4 PE=1 SV=1;tr|A0A0G2JDY5|A0A0G2JDY5_MOUSE Microtubule-	11.0101	11.0965	11.1175	11.7104	10.3497	11.2227	2062.39	2189.67	2221.78	3351.06	1304.88	2389.84	0.918826	-0.122137	0.763951	0.116935
Beta-adrenergic receptor kinase 1	Adrbk1	sp|Q99MK8|ARBK1_MOUSE Beta-adrenergic receptor kinase 1 OS=Mus musculus OX=10090 GN=Grk2 PE=1 SV=2	11.3147	11.2759	9.65886	10.3742	11.3339	10.2779	2547.21	2479.61	808.363	1327.23	2581.33	1241.53	1.13303	0.180181	0.765345	0.116143
Fructose-bisphosphate aldolase A;Fructose-bisphosphate aldolase	Aldoa;Aldoart1;Aldoart2	sp|P05064|ALDOA_MOUSE Fructose-bisphosphate aldolase A OS=Mus musculus OX=10090 GN=Aldoa PE=1 SV=2;tr|A6ZI44|A6ZI44_MOUSE Fructose-bisphosphate aldolase OS=Mus musculus OX=10090 GN=Aldoa PE=1 SV=1;tr|Q9CPQ9|Q9CPQ9_MOUSE Fructose-bisphosphate aldolase OS=Mu	15.9508	16.6537	16.6023	16.4991	16.4495	16.0971	63338.7	103101	99492.5	92624.1	89493.8	70098.7	1.05438	0.0763958	0.76859	0.114305
Endoplasmic reticulum resident protein 44	Erp44	sp|Q9D1Q6|ERP44_MOUSE Endoplasmic reticulum resident protein 44 OS=Mus musculus OX=10090 GN=Erp44 PE=1 SV=1	11.2812	11.6386	11.6158	11.1335	11.6576	11.8993	2488.74	3188.36	3138.37	2246.56	3230.63	3819.85	0.948203	-0.0767329	0.769232	0.113943
Plasminogen activator inhibitor 1 RNA-binding protein	Serbp1	sp|Q9CY58|PAIRB_MOUSE Plasminogen activator inhibitor 1 RNA-binding protein OS=Mus musculus OX=10090 GN=Serbp1 PE=1 SV=2;tr|A0A0N4SWH2|A0A0N4SWH2_MOUSE Plasminogen activator inhibitor 1 RNA-binding protein OS=Mus musculus OX=10090 GN=Serbp1 PE=1 SV=1;tr|A0	13.2367	12.718	12.6112	12.7601	12.6869	12.9739	9652.59	6737.51	6256.76	6937.02	6593.83	8045.13	1.04963	0.0698852	0.771329	0.11276
60S acidic ribosomal protein P1	Rplp1	sp|P47955|RLA1_MOUSE 60S acidic ribosomal protein P1 OS=Mus musculus OX=10090 GN=Rplp1 PE=1 SV=1	11.147	10.3262	12.0983	11.5546	10.9557	10.9952	2267.68	1283.8	4384.81	3008.02	1986.07	2041.2	1.12807	0.173855	0.773032	0.111803
Chloride intracellular channel protein 5	Clic5	sp|Q8BXK9|CLIC5_MOUSE Chloride intracellular channel protein 5 OS=Mus musculus OX=10090 GN=Clic5 PE=1 SV=1;tr|A0A668KLB7|A0A668KLB7_MOUSE Chloride intracellular channel protein 5 OS=Mus musculus OX=10090 GN=Clic5 PE=4 SV=1	12.3245	11.7353	11.5447	10.7164	12.5968	12.2954	5129.14	3409.39	2987.45	1682.51	6194.62	5026.71	0.893221	-0.162911	0.775079	0.110654
Lactadherin	Mfge8	sp|P21956|MFGM_MOUSE Lactadherin OS=Mus musculus OX=10090 GN=Mfge8 PE=1 SV=3	18.4133	19.4139	18.8545	19.0197	19.3316	18.7486	349105	698500	473991	531496	659768	440444	0.932516	-0.100799	0.775678	0.110319
Eukaryotic translation initiation factor 3 subunit L	Eif3l	sp|Q8QZY1|EIF3L_MOUSE Eukaryotic translation initiation factor 3 subunit L OS=Mus musculus OX=10090 GN=Eif3l PE=1 SV=1	10.7382	10.442	10.1874	10.654	10.5222	9.90569	1708.13	1391.09	1166.04	1611.29	1470.61	959.201	1.05547	0.0778837	0.782384	0.10658
Protein tweety homolog 1	Ttyh1	sp|Q9D3A9|TTYH1_MOUSE Protein tweety homolog 1 OS=Mus musculus OX=10090 GN=Ttyh1 PE=1 SV=1;tr|A0A0U1RPU8|A0A0U1RPU8_MOUSE Protein tweety homolog OS=Mus musculus OX=10090 GN=Ttyh1 PE=1 SV=1	14.5658	15.2538	14.6624	14.8635	14.8924	14.5906	24251.7	39070.7	25931.2	29809.8	30413	24672.2	1.05134	0.0722306	0.786912	0.104074
Proteasome subunit alpha type-5	Psma5	sp|Q9Z2U1|PSA5_MOUSE Proteasome subunit alpha type-5 OS=Mus musculus OX=10090 GN=Psma5 PE=1 SV=1	11.3617	10.6529	12.2583	11.6324	11.8021	11.6632	2631.56	1610.06	4899.1	3174.69	3570.97	3243.19	0.915091	-0.128012	0.787219	0.103904
Probable ATP-dependent RNA helicase DDX6	Ddx6	sp|P54823|DDX6_MOUSE Probable ATP-dependent RNA helicase DDX6 OS=Mus musculus OX=10090 GN=Ddx6 PE=1 SV=1	13.3896	13.7334	13.1611	13.8612	13.1639	13.4618	10731.8	13619.6	9159.8	14881.2	9177.59	11282.5	0.948217	-0.0767105	0.787469	0.103766
GMP reductase 2	Gmpr2	sp|Q99L27|GMPR2_MOUSE GMP reductase 2 OS=Mus musculus OX=10090 GN=Gmpr2 PE=1 SV=2	11.5471	10.9573	9.39779	10.9247	10.9369	10.1376	2992.43	1988.27	674.554	1943.85	1960.36	1126.48	1.12415	0.168838	0.788351	0.10328
U6 snRNA-associated Sm-like protein LSm4	Lsm4	sp|Q9QXA5|LSM4_MOUSE U6 snRNA-associated Sm-like protein LSm4 OS=Mus musculus OX=10090 GN=Lsm4 PE=1 SV=1;tr|D3YTP8|D3YTP8_MOUSE U6 snRNA-associated Sm-like protein LSm4 (Fragment) OS=Mus musculus OX=10090 GN=Lsm4 PE=1 SV=8;tr|Q9CY46|Q9CY46_MOUSE U6 snRNA-a	11.6354	10.3284	10.9675	10.3851	11.1278	11.1957	3181.3	1285.75	2002.38	1337.29	2237.7	2345.53	1.09271	0.127914	0.788638	0.103122
Immunoglobulin superfamily member 3	Igsf3	sp|Q6ZQA6|IGSF3_MOUSE Immunoglobulin superfamily member 3 OS=Mus musculus OX=10090 GN=Igsf3 PE=1 SV=2;tr|A0A0A6YX40|A0A0A6YX40_MOUSE Immunoglobulin superfamily member 3 OS=Mus musculus OX=10090 GN=Igsf3 PE=1 SV=1	13.6803	13.9721	14.0922	13.7758	13.9302	13.9541	13127.5	16070.2	17465.3	14025.8	15610.2	15870.9	1.0254	0.0361887	0.797124	0.0984742
Tetraspanin;Tetraspanin-5	Tspan5	tr|D3Z641|D3Z641_MOUSE Tetraspanin OS=Mus musculus OX=10090 GN=Tspan5 PE=1 SV=1;sp|P62080|TSN5_MOUSE Tetraspanin-5 OS=Mus musculus OX=10090 GN=Tspan5 PE=1 SV=1	11.8643	14.6181	12.3712	13.4878	13.0607	13.0462	3728.29	25147	5297.88	11487.7	8544.02	8458.58	1.19947	0.262395	0.799087	0.097406
Nucleolar protein 56	Nop56	sp|Q9D6Z1|NOP56_MOUSE Nucleolar protein 56 OS=Mus musculus OX=10090 GN=Nop56 PE=1 SV=2;tr|F6U250|F6U250_MOUSE Nucleolar protein 56 (Fragment) OS=Mus musculus OX=10090 GN=Nop56 PE=1 SV=1;tr|F6V095|F6V095_MOUSE Nucleolar protein 56 (Fragment) OS=Mus musculus	10.1994	9.84834	8.83919	9.63059	9.68168	9.59057	1175.78	921.819	457.996	792.677	821.251	770.991	1.07156	0.0997174	0.800456	0.0966624
F-actin-capping protein subunit alpha-1	Capza1	tr|Q5RKN9|Q5RKN9_MOUSE F-actin-capping protein subunit alpha OS=Mus musculus OX=10090 GN=Capza1 PE=1 SV=1;sp|P47753|CAZA1_MOUSE F-actin-capping protein subunit alpha-1 OS=Mus musculus OX=10090 GN=Capza1 PE=1 SV=4	12.8731	12.6986	12.9605	12.904	12.7563	12.8123	7502.21	6647.52	7970.75	7664.63	6918.77	7192.61	1.01582	0.022643	0.808871	0.0921206
Proteasome subunit alpha type-7	Psma7	sp|Q9Z2U0|PSA7_MOUSE Proteasome subunit alpha type-7 OS=Mus musculus OX=10090 GN=Psma7 PE=1 SV=1;tr|A0A338P7D7|A0A338P7D7_MOUSE Proteasome subunit alpha type OS=Mus musculus OX=10090 GN=Psma7 PE=1 SV=1	11.3001	11.299	11.7596	12.2434	11.3804	10.7696	2521.56	2519.64	3467.31	4848.76	2665.89	1745.71	0.918809	-0.122163	0.809401	0.0918364
Ras-related protein Rab-1B	Rab1b	sp|Q9D1G1|RAB1B_MOUSE Ras-related protein Rab-1B OS=Mus musculus OX=10090 GN=Rab1b PE=1 SV=1;tr|A0A494B945|A0A494B945_MOUSE Ras-related protein Rab-1B (Fragment) OS=Mus musculus OX=10090 GN=Rab1b PE=1 SV=1	10.4414	10.8299	11.6637	9.47997	11.5326	11.0461	1390.51	1820.22	3244.32	714.094	2962.5	2114.5	1.11465	0.156593	0.810105	0.0914585
UMP-CMP kinase	Cmpk1	sp|Q9DBP5|KCY_MOUSE UMP-CMP kinase OS=Mus musculus OX=10090 GN=Cmpk1 PE=1 SV=1;tr|A0A0R4J093|A0A0R4J093_MOUSE UMP-CMP kinase OS=Mus musculus OX=10090 GN=Cmpk1 PE=1 SV=1	11.6881	11.8339	12.1942	12.2586	11.8285	11.2836	3299.66	3650.55	4686.19	4900.12	3636.92	2492.88	1.05499	0.0772233	0.815261	0.0887034
Epidermal growth factor receptor	Egfr	sp|Q01279|EGFR_MOUSE Epidermal growth factor receptor OS=Mus musculus OX=10090 GN=Egfr PE=1 SV=1;tr|Q9WVF5|Q9WVF5_MOUSE Epidermal growth factor receptor OS=Mus musculus OX=10090 GN=Egfr PE=1 SV=1	14.8236	14.8363	14.8665	15.0433	14.6795	14.6814	28996.7	29253.1	29871.9	33766.4	26240.4	26274.9	1.02132	0.0304415	0.819432	0.0864869
Cystatin-C	Cst3	sp|P21460|CYTC_MOUSE Cystatin-C OS=Mus musculus OX=10090 GN=Cst3 PE=1 SV=2;tr|A2APX3|A2APX3_MOUSE Cystatin-C (Fragment) OS=Mus musculus OX=10090 GN=Cst3 PE=1 SV=1	10.9224	11.47	12.1563	11.0817	11.6707	11.6842	1940.75	2836.7	4564.69	2167.33	3260.1	3290.75	1.07157	0.0997277	0.819583	0.0864071
Alpha-actinin-4;Alpha-actinin-1	Actn4;Actn1	sp|P57780|ACTN4_MOUSE Alpha-actinin-4 OS=Mus musculus OX=10090 GN=Actn4 PE=1 SV=1;tr|A0A1L1SV25|A0A1L1SV25_MOUSE Alpha-actinin-4 OS=Mus musculus OX=10090 GN=Actn4 PE=1 SV=1;sp|Q7TPR4|ACTN1_MOUSE Alpha-actinin-1 OS=Mus musculus OX=10090 GN=Actn1 PE=1 SV=1;t	13.2742	12.9639	14.0785	13.5042	13.8302	13.453	9906.78	7989.56	17300.2	11619	14564.8	11213.9	0.941141	-0.0875177	0.820483	0.0859305
Myosin light polypeptide 6	Myl6	sp|Q60605|MYL6_MOUSE Myosin light polypeptide 6 OS=Mus musculus OX=10090 GN=Myl6 PE=1 SV=3;tr|A0A1W2P6F6|A0A1W2P6F6_MOUSE Myosin light polypeptide 6 OS=Mus musculus OX=10090 GN=Myl6 PE=1 SV=1;tr|A0A1W2P7Q9|A0A1W2P7Q9_MOUSE Myosin light polypeptide 6 OS=Mus	16.3913	16.0386	16.4022	16.4215	16.1816	16.3438	85955.4	67313.1	86607.2	87773.6	74327.1	83171.4	0.977998	-0.032096	0.821201	0.0855507
Secretory carrier-associated membrane protein 3	Scamp3	sp|O35609|SCAM3_MOUSE Secretory carrier-associated membrane protein 3 OS=Mus musculus OX=10090 GN=Scamp3 PE=1 SV=3;tr|E9Q855|E9Q855_MOUSE Secretory carrier-associated membrane protein OS=Mus musculus OX=10090 GN=Scamp3 PE=1 SV=1;tr|Q3UXS0|Q3UXS0_MOUSE Secr	10.7179	10.9733	11.7548	11.6078	11.3059	10.929	1684.26	2010.45	3455.79	3121.02	2531.72	1949.65	0.94056	-0.0884081	0.825711	0.0831721
[truncated: 77 more rows]

## Sheet: AQ
			aExo1(log2)	aExo2(log2)	aExo3(log2)	qExo1(log2)	qExo1(log2)	qExo1(log2)	aExo1	aExo2	aExo3	qExo1	qExo2	qExo3
[truncated: 1,211 more rows]

[truncated: 5 more sheets: ARE, QRE Qhigh significantly, QRE REhigh significantly, AQ Ahigh significantly, AQ Qhigh significantly]
